# Supplementary material
Source: MDPI journal article supplement (https://www.mdpi.com/2673-7256/2/1/9)
Supplement: s1 [file s1]

Supporting Information for

**Local and Remote Conformational Switching in 2-Fluoro-4-Hydroxy Benzoic Acid**

Sándor Góbi,<sup>a</sup> Mirjam Balbisi,<sup>b</sup> and György Tarczay<sup>a,b,\*</sup>

<sup>a</sup> *MTA-ELTE Lendület Laboratory Astrochemistry Research Group, Institute of Chemistry, ELTE Eötvös Loránd University, H-1518 Budapest, Hungary*

<sup>b</sup> *Laboratory of Molecular Spectroscopy, Institute of Chemistry, ELTE Eötvös Loránd University, H-1518 Budapest, Hungary*

**Table S1.** Geometry of conformer **A1** in Cartesian coordinates in Å as obtained at the B3LYP/cc-pVTZ level of theory.

|   |           |           |           |
|---|-----------|-----------|-----------|
| C | -2.195067 | -0.120805 | 0.000003  |
| C | -1.444508 | 1.050103  | -0.000005 |
| C | -0.065806 | 0.966306  | -0.000009 |
| C | 0.613295  | -0.257527 | -0.000005 |
| C | -0.176134 | -1.414043 | -0.000004 |
| C | -1.554801 | -1.362598 | 0.000001  |
| H | -1.928175 | 2.015225  | -0.000010 |
| H | 0.338127  | -2.364088 | -0.000005 |
| H | -2.136617 | -2.275739 | 0.000007  |
| C | 2.082881  | -0.445444 | 0.000000  |
| O | 2.619545  | -1.529622 | -0.000017 |
| O | 2.794669  | 0.701671  | 0.000033  |
| H | 3.725498  | 0.434414  | 0.000036  |
| F | 0.605253  | 2.124492  | -0.000017 |
| O | -3.545388 | 0.007610  | 0.000012  |
| H | -3.955878 | -0.863451 | 0.000015  |

**Table S2.** Geometry of conformer **A2** in Cartesian coordinates in Å as obtained at the B3LYP/cc-pVTZ level of theory.

|   |           |           |           |
|---|-----------|-----------|-----------|
| C | -2.186263 | -0.167431 | 0.000004  |
| C | -1.481146 | 1.031714  | -0.000001 |
| C | -0.100987 | 1.000212  | -0.000004 |
| C | 0.626085  | -0.198081 | -0.000001 |
| C | -0.117956 | -1.384784 | 0.000004  |
| C | -1.499261 | -1.383059 | 0.000007  |
| H | -2.000885 | 1.977870  | -0.000004 |
| H | 0.414151  | -2.323294 | 0.000007  |
| H | -2.046095 | -2.317569 | 0.000011  |
| C | 2.104427  | -0.215198 | -0.000003 |
| O | 2.833980  | 0.743968  | -0.000005 |
| O | 2.599816  | -1.485480 | 0.000002  |
| H | 3.562504  | -1.389709 | 0.000002  |
| F | 0.530261  | 2.176151  | -0.000009 |
| O | -3.540489 | -0.090547 | 0.000006  |
| H | -3.917876 | -0.976437 | 0.000010  |

**Table S3.** Geometry of conformer **B1** in Cartesian coordinates in Å as obtained at the B3LYP/cc-pVTZ level of theory.

|   |           |           |           |
|---|-----------|-----------|-----------|
| C | -2.194251 | -0.158020 | -0.000001 |
| C | -1.455917 | 1.021280  | -0.000002 |
| C | -0.073406 | 0.955725  | -0.000002 |
| C | 0.616564  | -0.258200 | -0.000001 |
| C | -0.163322 | -1.424843 | 0.000000  |
| C | -1.540401 | -1.392398 | 0.000000  |
| H | -1.932714 | 1.992474  | -0.000003 |
| H | 0.362458  | -2.368561 | 0.000000  |
| H | -2.126051 | -2.299778 | 0.000001  |
| C | 2.088044  | -0.428408 | -0.000001 |
| O | 2.638109  | -1.505508 | 0.000002  |
| O | 2.785934  | 0.727933  | 0.000007  |
| H | 3.719843  | 0.471678  | 0.000011  |
| F | 0.579142  | 2.125201  | -0.000003 |
| O | -3.550563 | -0.166093 | -0.000001 |
| H | -3.887529 | 0.735905  | -0.000001 |

**Table S4.** Geometry of conformer **B2** in Cartesian coordinates in Å as obtained at the B3LYP/cc-pVTZ level of theory.

|   |           |           |           |
|---|-----------|-----------|-----------|
| C | -2.184387 | -0.204872 | 0.000002  |
| C | -1.492035 | 1.002283  | 0.000001  |
| C | -0.108797 | 0.989389  | 0.000000  |
| C | 0.629035  | -0.198406 | 0.000000  |
| C | -0.104910 | -1.394926 | 0.000001  |
| C | -1.483847 | -1.412410 | 0.000002  |
| H | -2.005266 | 1.954693  | 0.000001  |
| H | 0.439030  | -2.326670 | 0.000001  |
| H | -2.034567 | -2.341415 | 0.000002  |
| C | 2.107404  | -0.197571 | 0.000000  |
| O | 2.824789  | 0.771081  | -0.000002 |
| O | 2.617863  | -1.461108 | -0.000004 |
| H | 3.579419  | -1.354431 | -0.000006 |
| F | 0.503463  | 2.176033  | -0.000001 |
| O | -3.539395 | -0.265075 | 0.000002  |
| H | -3.910622 | 0.623406  | 0.000002  |

**Table S5.** Geometry of conformer **C1** in Cartesian coordinates in Å as obtained at the B3LYP/cc-pVTZ level of theory.

|   |           |           |           |
|---|-----------|-----------|-----------|
| C | -2.190585 | -0.150256 | -0.000003 |
| C | -1.444828 | 1.025973  | -0.000001 |
| C | -0.067883 | 0.932920  | 0.000001  |
| C | 0.626003  | -0.271802 | 0.000000  |
| C | -0.163018 | -1.431478 | -0.000002 |
| C | -1.540597 | -1.386756 | -0.000003 |
| H | -1.911063 | 2.001935  | 0.000000  |
| H | 0.358172  | -2.377806 | -0.000002 |
| H | -2.132096 | -2.290457 | -0.000005 |
| C | 2.113806  | -0.446868 | 0.000002  |
| O | 2.626609  | -1.534386 | 0.000002  |
| O | 2.881672  | 0.662272  | 0.000004  |
| H | 2.337613  | 1.460317  | 0.000004  |
| F | 0.614926  | 2.113932  | 0.000003  |
| O | -3.545968 | -0.152764 | -0.000004 |
| H | -3.882852 | 0.749249  | -0.000004 |

**Table S6.** Geometry of conformer **C2** in Cartesian coordinates in Å as obtained at the B3LYP/cc-pVTZ level of theory.

|   |           |           |           |
|---|-----------|-----------|-----------|
| C | -2.177944 | -0.187361 | -0.022141 |
| C | -1.471217 | 1.006057  | 0.101344  |
| C | -0.088746 | 0.977099  | 0.086530  |
| C | 0.635530  | -0.210205 | -0.027009 |
| C | -0.109379 | -1.391380 | -0.142813 |
| C | -1.491136 | -1.395051 | -0.147964 |
| H | -1.974075 | 1.957784  | 0.210724  |
| H | 0.410950  | -2.331476 | -0.273085 |
| H | -2.050913 | -2.312096 | -0.256845 |
| C | 2.127153  | -0.206680 | -0.089008 |
| O | 2.786141  | 0.650821  | -0.602730 |
| O | 2.736773  | -1.291822 | 0.468925  |
| H | 2.101018  | -1.812044 | 0.973143  |
| F | 0.550165  | 2.142797  | 0.223103  |
| O | -3.533795 | -0.233594 | -0.025028 |
| H | -3.896986 | 0.654554  | 0.055172  |

**Table S7.** Geometry of conformer **C2\*** in Cartesian coordinates in Å as obtained at the B3LYP/cc-pVTZ level of theory.

|   |           |           |           |
|---|-----------|-----------|-----------|
| C | 2.177944  | -0.187361 | -0.022141 |
| C | 1.471217  | 1.006057  | 0.101344  |
| C | 0.088746  | 0.977099  | 0.086530  |
| C | -0.635530 | -0.210205 | -0.027009 |
| C | 0.109379  | -1.391380 | -0.142813 |
| C | 1.491136  | -1.395051 | -0.147964 |
| H | 1.974075  | 1.957784  | 0.210724  |
| H | -0.410950 | -2.331476 | -0.273085 |
| H | 2.050913  | -2.312096 | -0.256845 |
| C | -2.127153 | -0.206680 | -0.089008 |
| O | -2.786141 | 0.650821  | -0.602730 |
| O | -2.736773 | -1.291822 | 0.468925  |
| H | -2.101018 | -1.812044 | 0.973143  |
| F | -0.550165 | 2.142797  | 0.223103  |
| O | 3.533795  | -0.233594 | -0.025028 |
| H | 3.896986  | 0.654554  | 0.055172  |

**Table S8.** Geometry of conformer **D1** in Cartesian coordinates in Å as obtained at the B3LYP/cc-pVTZ level of theory.

|   |          |          |          |
|---|----------|----------|----------|
| C | -2.19110 | -0.11407 | 0.00000  |
| C | -1.43280 | 1.05375  | 0.00000  |
| C | -0.06036 | 0.94270  | 0.00000  |
| C | 0.62252  | -0.27218 | 0.00000  |
| C | -0.17597 | -1.42142 | 0.00000  |
| C | -1.55519 | -1.35783 | 0.00000  |
| H | -1.90663 | 2.02359  | 0.00000  |
| H | 0.33374  | -2.37401 | 0.00000  |
| H | -2.14260 | -2.26742 | -0.00001 |
| C | 2.10833  | -0.46426 | 0.00000  |
| O | 2.60854  | -1.55797 | 0.00001  |
| O | 2.88812  | 0.63572  | -0.00001 |
| H | 2.35248  | 1.43974  | -0.00001 |
| F | 0.64114  | 2.11203  | 0.00000  |
| O | -3.53939 | 0.02390  | 0.00000  |
| H | -3.95794 | -0.84344 | 0.00000  |

**Table S9.** Geometry of conformer **D2** in Cartesian coordinates in Å as obtained at the B3LYP/cc-pVTZ level of theory.

|   |           |           |           |
|---|-----------|-----------|-----------|
| C | -2.179264 | -0.151861 | 0.020311  |
| C | -1.460097 | 1.033754  | -0.105509 |
| C | -0.081213 | 0.986690  | -0.090383 |
| C | 0.632198  | -0.210749 | 0.025403  |
| C | -0.121643 | -1.382233 | 0.142394  |
| C | -1.506154 | -1.367023 | 0.147874  |
| H | -1.970547 | 1.978847  | -0.214292 |
| H | 0.387919  | -2.327993 | 0.273513  |
| H | -2.061281 | -2.289585 | 0.260000  |
| C | 2.123802  | -0.224225 | 0.092704  |
| O | 2.789901  | 0.616399  | 0.624129  |
| O | 2.723220  | -1.307566 | -0.480756 |
| H | 2.083908  | -1.807527 | -1.000705 |
| F | 0.577229  | 2.140801  | -0.228201 |
| O | -3.532777 | -0.058105 | 0.010684  |
| H | -3.923583 | -0.932895 | 0.106085  |

**Table S10.** Geometry of conformer **D2\*** in Cartesian coordinates in Å as obtained at the B3LYP/cc-pVTZ level of theory.

|   |           |           |           |
|---|-----------|-----------|-----------|
| C | -2.179264 | -0.151858 | 0.020197  |
| C | -1.460091 | 1.033737  | -0.105766 |
| C | -0.081208 | 0.986677  | -0.090551 |
| C | 0.632195  | -0.210745 | 0.025468  |
| C | -0.121652 | -1.382212 | 0.142595  |
| C | -1.506162 | -1.367001 | 0.147982  |
| H | -1.970535 | 1.978814  | -0.214726 |
| H | 0.387904  | -2.327951 | 0.273894  |
| H | -2.061300 | -2.289544 | 0.260218  |
| C | 2.123794  | -0.224208 | 0.092877  |
| O | 2.789854  | 0.616505  | 0.624211  |
| O | 2.723257  | -1.307647 | -0.480356 |
| H | 2.083983  | -1.807693 | -1.000271 |
| F | 0.577244  | 2.140765  | -0.228500 |
| O | -3.532778 | -0.058104 | 0.010469  |
| H | -3.923588 | -0.932880 | 0.105984  |

**Table S11.** Harmonic and anharmonic vibrational frequencies and their intensities of conformer **A1** as computed at the B3LYP/cc-pVTZ level of theory.

| Mode (quanta) | $\nu_{\text{harm}}$<br>( $\text{cm}^{-1}$ ) | $\nu_{\text{anharm}}$<br>( $\text{cm}^{-1}$ ) | $I_{\text{harm}}$<br>( $\text{km mol}^{-1}$ ) | $I_{\text{anharm}}$<br>( $\text{km mol}^{-1}$ ) |
|---------------|---------------------------------------------|-----------------------------------------------|-----------------------------------------------|-------------------------------------------------|
| 1(1)          | 3810.6                                      | 3626.5                                        | 86.9                                          | 71.5                                            |
| 2(1)          | 3745.2                                      | 3564.0                                        | 90.7                                          | 72.5                                            |
| 3(1)          | 3214.3                                      | 3087.5                                        | 0.1                                           | 0.7                                             |
| 4(1)          | 3206.7                                      | 3071.4                                        | 2.3                                           | 3.9                                             |
| 5(1)          | 3166.5                                      | 3031.5                                        | 9.5                                           | 11.1                                            |
| 6(1)          | 1775.4                                      | 1746.2                                        | 361.5                                         | 328.7                                           |
| 7(1)          | 1662.3                                      | 1618.4                                        | 309.7                                         | 169.9                                           |
| 8(1)          | 1624.1                                      | 1586.9                                        | 71.2                                          | 51.7                                            |
| 9(1)          | 1537.9                                      | 1498.2                                        | 17.0                                          | 11.0                                            |
| 10(1)         | 1495.5                                      | 1459.6                                        | 156.5                                         | 113.4                                           |
| 11(1)         | 1389.0                                      | 1369.1                                        | 69.3                                          | 48.8                                            |
| 12(1)         | 1366.3                                      | 1335.4                                        | 25.5                                          | 46.4                                            |
| 13(1)         | 1330.9                                      | 1298.8                                        | 187.8                                         | 120.6                                           |
| 14(1)         | 1273.6                                      | 1246.5                                        | 41.1                                          | 11.4                                            |
| 15(1)         | 1226.0                                      | 1206.4                                        | 40.2                                          | 21.7                                            |
| 16(1)         | 1210.1                                      | 1180.0                                        | 159.8                                         | 98.4                                            |
| 17(1)         | 1172.6                                      | 1146.3                                        | 50.1                                          | 37.6                                            |
| 18(1)         | 1137.7                                      | 1115.6                                        | 371.0                                         | 212.1                                           |
| 19(1)         | 1107.3                                      | 1084.7                                        | 6.5                                           | 26.2                                            |
| 20(1)         | 997.0                                       | 975.2                                         | 1.3                                           | 0.8                                             |
| 21(1)         | 991.3                                       | 976.6                                         | 44.4                                          | 29.2                                            |
| 22(1)         | 878.8                                       | 872.8                                         | 33.8                                          | 28.8                                            |
| 23(1)         | 840.4                                       | 829.1                                         | 4.1                                           | 1.8                                             |
| 24(1)         | 786.2                                       | 775.6                                         | 53.0                                          | 37.2                                            |
| 25(1)         | 758.3                                       | 746.1                                         | 6.1                                           | 6.2                                             |
| 26(1)         | 744.1                                       | 731.7                                         | 11.5                                          | 7.8                                             |
| 27(1)         | 712.2                                       | 698.9                                         | 33.7                                          | 17.1                                            |
| 28(1)         | 654.3                                       | 643.1                                         | 0.0                                           | 0.0                                             |
| 29(1)         | 613.8                                       | 608.4                                         | 29.5                                          | 27.8                                            |
| 30(1)         | 594.8                                       | 573.7                                         | 63.2                                          | 69.4                                            |
| 31(1)         | 587.4                                       | 580.9                                         | 46.5                                          | 45.1                                            |
| 32(1)         | 530.2                                       | 527.7                                         | 4.1                                           | 2.7                                             |
| 33(1)         | 473.8                                       | 466.2                                         | 3.7                                           | 6.5                                             |
| 34(1)         | 406.2                                       | 404.6                                         | 5.6                                           | 4.4                                             |
| 35(1)         | 395.6                                       | 363.1                                         | 99.4                                          | 95.6                                            |
| 36(1)         | 356.4                                       | 354.7                                         | 0.8                                           | 0.6                                             |

|       |        |        |     |      |
|-------|--------|--------|-----|------|
| 37(1) | 322.3  | 320.9  | 1.3 | 1.0  |
| 38(1) | 293.5  | 289.0  | 1.3 | 1.7  |
| 39(1) | 225.0  | 221.8  | 1.7 | 1.7  |
| 40(1) | 202.0  | 199.1  | 4.2 | 4.2  |
| 41(1) | 100.0  | 98.3   | 0.0 | 0.0  |
| 42(1) | 45.8   | 30.1   | 2.8 | 2.7  |
| 1(2)  | 7621.3 | 7085.6 |     | 6.2  |
| 2(2)  | 7490.4 | 6963.8 |     | 5.8  |
| 3(2)  | 6428.7 | 6070.8 |     | 0.7  |
| 4(2)  | 6413.4 | 6056.5 |     | 0.5  |
| 5(2)  | 6333.0 | 5969.7 |     | 0.7  |
| 6(2)  | 3550.8 | 3474.6 |     | 3.2  |
| 7(2)  | 3324.6 | 3236.2 |     | 0.4  |
| 8(2)  | 3248.1 | 3168.5 |     | 1.0  |
| 9(2)  | 3075.8 | 2994.2 |     | 0.3  |
| 10(2) | 2991.0 | 2918.0 |     | 0.1  |
| 11(2) | 2778.0 | 2699.5 |     | 0.3  |
| 12(2) | 2732.6 | 2671.1 |     | 1.3  |
| 13(2) | 2661.8 | 2593.7 |     | 1.0  |
| 14(2) | 2547.2 | 2489.1 |     | 0.2  |
| 15(2) | 2452.0 | 2396.1 |     | 1.4  |
| 16(2) | 2420.1 | 2356.6 |     | 0.8  |
| 17(2) | 2345.2 | 2291.8 |     | 0.1  |
| 18(2) | 2275.4 | 2229.9 |     | 0.8  |
| 19(2) | 2214.6 | 2166.7 |     | 0.7  |
| 20(2) | 1994.0 | 1946.2 |     | 3.4  |
| 21(2) | 1982.5 | 1952.1 |     | 0.5  |
| 22(2) | 1757.5 | 1748.3 |     | 1.9  |
| 23(2) | 1680.9 | 1658.4 |     | 5.8  |
| 24(2) | 1572.3 | 1551.9 |     | 0.1  |
| 25(2) | 1516.6 | 1491.2 |     | 0.3  |
| 26(2) | 1488.1 | 1463.2 |     | 1.1  |
| 27(2) | 1424.5 | 1399.6 |     | 0.4  |
| 28(2) | 1308.6 | 1286.2 |     | 1.3  |
| 29(2) | 1227.7 | 1217.7 |     | 20.7 |
| 30(2) | 1189.6 | 1134.5 |     | 6.1  |
| 31(2) | 1174.9 | 1161.4 |     | 2.4  |
| 32(2) | 1060.4 | 1055.1 |     | 0.2  |
| 33(2) | 947.7  | 932.7  |     | 0.4  |
| 34(2) | 812.4  | 809.3  |     | 0.1  |



|       |      |        |        |     |
|-------|------|--------|--------|-----|
| 35(2) |      | 791.1  | 702.2  | 9.9 |
| 36(2) |      | 712.8  | 709.3  | 0.2 |
| 37(2) |      | 644.6  | 642.0  | 0.1 |
| 38(2) |      | 586.9  | 578.2  | 0.4 |
| 39(2) |      | 450.0  | 443.5  | 0.3 |
| 40(2) |      | 404.0  | 395.5  | 0.5 |
| 41(2) |      | 200.0  | 195.1  | 0.0 |
| 42(2) |      | 91.5   | 60.5   | 0.0 |
| 2(1)  | 1(1) | 7555.8 | 7190.5 | 0.0 |
| 3(1)  | 1(1) | 7025.0 | 6715.6 | 0.0 |
| 3(1)  | 2(1) | 6959.5 | 6653.3 | 0.0 |
| 4(1)  | 1(1) | 7017.3 | 6706.3 | 0.0 |
| 4(1)  | 2(1) | 6951.9 | 6644.0 | 0.0 |
| 4(1)  | 3(1) | 6421.1 | 6166.0 | 0.0 |
| 5(1)  | 1(1) | 6977.1 | 6664.4 | 0.0 |
| 5(1)  | 2(1) | 6911.7 | 6603.4 | 0.0 |
| 5(1)  | 3(1) | 6380.8 | 6128.4 | 0.0 |
| 5(1)  | 4(1) | 6373.2 | 6108.4 | 0.1 |
| 6(1)  | 1(1) | 5586.0 | 5372.6 | 0.0 |
| 6(1)  | 2(1) | 5520.6 | 5309.0 | 1.0 |
| 6(1)  | 3(1) | 4989.8 | 4835.5 | 0.0 |
| 6(1)  | 4(1) | 4982.1 | 4826.4 | 0.1 |
| 6(1)  | 5(1) | 4941.9 | 4785.7 | 0.0 |
| 7(1)  | 1(1) | 5472.9 | 5244.5 | 0.0 |
| 7(1)  | 2(1) | 5407.5 | 5183.2 | 0.0 |
| 7(1)  | 3(1) | 4876.6 | 4711.3 | 0.0 |
| 7(1)  | 4(1) | 4869.0 | 4701.5 | 0.0 |
| 7(1)  | 5(1) | 4828.8 | 4658.7 | 0.3 |
| 7(1)  | 6(1) | 3437.7 | 3364.9 | 0.2 |
| 8(1)  | 1(1) | 5434.7 | 5212.0 | 0.6 |
| 8(1)  | 2(1) | 5369.3 | 5151.0 | 0.0 |
| 8(1)  | 3(1) | 4838.4 | 4674.3 | 0.2 |
| 8(1)  | 4(1) | 4830.8 | 4666.0 | 0.2 |
| 8(1)  | 5(1) | 4790.5 | 4627.8 | 0.1 |
| 8(1)  | 6(1) | 3399.5 | 3332.3 | 0.1 |
| 8(1)  | 7(1) | 3286.4 | 3204.4 | 0.5 |
| 9(1)  | 1(1) | 5348.5 | 5125.7 | 0.0 |
| 9(1)  | 2(1) | 5283.1 | 5064.2 | 0.0 |
| 9(1)  | 3(1) | 4752.2 | 4590.2 | 0.1 |
| 9(1)  | 4(1) | 4744.6 | 4582.3 | 0.0 |

|       |       |        |        |     |
|-------|-------|--------|--------|-----|
| 9(1)  | 5(1)  | 4704.4 | 4540.4 | 0.1 |
| 9(1)  | 6(1)  | 3313.3 | 3246.4 | 0.2 |
| 9(1)  | 7(1)  | 3200.2 | 3128.9 | 0.1 |
| 9(1)  | 8(1)  | 3162.0 | 3084.9 | 0.1 |
| 10(1) | 1(1)  | 5306.1 | 5085.7 | 0.6 |
| 10(1) | 2(1)  | 5240.7 | 5024.8 | 0.0 |
| 10(1) | 3(1)  | 4709.8 | 4555.0 | 0.2 |
| 10(1) | 4(1)  | 4702.2 | 4543.0 | 0.0 |
| 10(1) | 5(1)  | 4662.0 | 4503.4 | 0.1 |
| 10(1) | 6(1)  | 3270.9 | 3207.1 | 0.0 |
| 10(1) | 7(1)  | 3157.8 | 3067.6 | 0.0 |
| 10(1) | 8(1)  | 3119.6 | 3042.7 | 0.3 |
| 10(1) | 9(1)  | 3033.4 | 2957.5 | 0.1 |
| 11(1) | 1(1)  | 5199.6 | 4979.0 | 0.2 |
| 11(1) | 2(1)  | 5134.2 | 4905.5 | 0.8 |
| 11(1) | 3(1)  | 4603.4 | 4442.4 | 0.0 |
| 11(1) | 4(1)  | 4595.7 | 4433.6 | 0.0 |
| 11(1) | 5(1)  | 4555.5 | 4391.8 | 0.0 |
| 11(1) | 6(1)  | 3164.4 | 3095.9 | 0.6 |
| 11(1) | 7(1)  | 3051.3 | 2970.4 | 0.3 |
| 11(1) | 8(1)  | 3013.1 | 2939.0 | 0.1 |
| 11(1) | 9(1)  | 2926.9 | 2851.5 | 0.4 |
| 11(1) | 10(1) | 2884.5 | 2813.0 | 0.3 |
| 12(1) | 1(1)  | 5177.0 | 4962.2 | 0.0 |
| 12(1) | 2(1)  | 5111.5 | 4900.3 | 0.0 |
| 12(1) | 3(1)  | 4580.7 | 4428.0 | 0.1 |
| 12(1) | 4(1)  | 4573.0 | 4417.7 | 0.0 |
| 12(1) | 5(1)  | 4532.8 | 4381.5 | 0.0 |
| 12(1) | 6(1)  | 3141.7 | 3083.0 | 0.1 |
| 12(1) | 7(1)  | 3028.6 | 2944.2 | 0.1 |
| 12(1) | 8(1)  | 2990.4 | 2916.4 | 0.1 |
| 12(1) | 9(1)  | 2904.2 | 2832.3 | 0.7 |
| 12(1) | 10(1) | 2861.8 | 2793.2 | 1.5 |
| 12(1) | 11(1) | 2755.3 | 2688.7 | 0.7 |
| 13(1) | 1(1)  | 5141.5 | 4926.3 | 0.6 |
| 13(1) | 2(1)  | 5076.1 | 4861.8 | 0.1 |
| 13(1) | 3(1)  | 4545.2 | 4387.7 | 0.2 |
| 13(1) | 4(1)  | 4537.6 | 4377.6 | 0.1 |
| 13(1) | 5(1)  | 4497.4 | 4337.9 | 0.1 |
| 13(1) | 6(1)  | 3106.3 | 3045.0 | 0.1 |

|       |       |        |        |     |
|-------|-------|--------|--------|-----|
| 13(1) | 7(1)  | 2993.2 | 2913.9 | 0.2 |
| 13(1) | 8(1)  | 2955.0 | 2883.5 | 0.1 |
| 13(1) | 9(1)  | 2868.8 | 2795.3 | 0.7 |
| 13(1) | 10(1) | 2826.4 | 2756.4 | 0.1 |
| 13(1) | 11(1) | 2719.9 | 2650.5 | 0.4 |
| 13(1) | 12(1) | 2697.2 | 2634.3 | 0.8 |
| 14(1) | 1(1)  | 5084.2 | 4871.1 | 0.1 |
| 14(1) | 2(1)  | 5018.8 | 4808.5 | 0.1 |
| 14(1) | 3(1)  | 4488.0 | 4331.8 | 0.1 |
| 14(1) | 4(1)  | 4480.3 | 4318.4 | 0.1 |
| 14(1) | 5(1)  | 4440.1 | 4284.4 | 0.0 |
| 14(1) | 6(1)  | 3049.0 | 2991.2 | 0.1 |
| 14(1) | 7(1)  | 2935.9 | 2860.9 | 0.1 |
| 14(1) | 8(1)  | 2897.7 | 2831.0 | 0.1 |
| 14(1) | 9(1)  | 2811.5 | 2743.1 | 0.0 |
| 14(1) | 10(1) | 2769.1 | 2704.4 | 0.1 |
| 14(1) | 11(1) | 2662.6 | 2597.6 | 0.1 |
| 14(1) | 12(1) | 2639.9 | 2581.1 | 0.4 |
| 14(1) | 13(1) | 2604.5 | 2542.8 | 0.1 |
| 15(1) | 1(1)  | 5036.6 | 4819.1 | 0.6 |
| 15(1) | 2(1)  | 4971.2 | 4762.5 | 0.1 |
| 15(1) | 3(1)  | 4440.3 | 4289.7 | 0.0 |
| 15(1) | 4(1)  | 4432.7 | 4276.0 | 0.1 |
| 15(1) | 5(1)  | 4392.5 | 4238.8 | 0.0 |
| 15(1) | 6(1)  | 3001.4 | 2945.4 | 0.1 |
| 15(1) | 7(1)  | 2888.3 | 2816.7 | 0.1 |
| 15(1) | 8(1)  | 2850.1 | 2783.5 | 0.0 |
| 15(1) | 9(1)  | 2763.9 | 2698.0 | 0.1 |
| 15(1) | 10(1) | 2721.5 | 2657.3 | 0.0 |
| 15(1) | 11(1) | 2615.0 | 2551.1 | 0.4 |
| 15(1) | 12(1) | 2592.3 | 2534.6 | 0.6 |
| 15(1) | 13(1) | 2556.9 | 2494.9 | 0.7 |
| 15(1) | 14(1) | 2499.6 | 2443.5 | 0.1 |
| 16(1) | 1(1)  | 5020.7 | 4805.2 | 0.1 |
| 16(1) | 2(1)  | 4955.3 | 4737.2 | 0.3 |
| 16(1) | 3(1)  | 4424.4 | 4267.9 | 0.0 |
| 16(1) | 4(1)  | 4416.8 | 4259.2 | 0.0 |
| 16(1) | 5(1)  | 4376.6 | 4216.0 | 0.0 |
| 16(1) | 6(1)  | 2985.5 | 2923.9 | 0.3 |
| 16(1) | 7(1)  | 2872.4 | 2796.8 | 0.1 |

|       |       |        |        |     |
|-------|-------|--------|--------|-----|
| 16(1) | 8(1)  | 2834.1 | 2765.8 | 0.1 |
| 16(1) | 9(1)  | 2748.0 | 2679.0 | 0.2 |
| 16(1) | 10(1) | 2705.6 | 2639.3 | 0.0 |
| 16(1) | 11(1) | 2599.1 | 2527.1 | 0.2 |
| 16(1) | 12(1) | 2576.4 | 2514.8 | 0.3 |
| 16(1) | 13(1) | 2541.0 | 2477.1 | 0.2 |
| 16(1) | 14(1) | 2483.7 | 2424.5 | 0.6 |
| 16(1) | 15(1) | 2436.1 | 2377.5 | 1.2 |
| 17(1) | 1(1)  | 4983.2 | 4772.3 | 0.2 |
| 17(1) | 2(1)  | 4917.8 | 4710.7 | 0.0 |
| 17(1) | 3(1)  | 4386.9 | 4227.3 | 0.1 |
| 17(1) | 4(1)  | 4379.3 | 4224.8 | 0.0 |
| 17(1) | 5(1)  | 4339.1 | 4184.5 | 0.0 |
| 17(1) | 6(1)  | 2948.0 | 2893.0 | 0.0 |
| 17(1) | 7(1)  | 2834.9 | 2762.8 | 0.1 |
| 17(1) | 8(1)  | 2796.7 | 2731.6 | 0.1 |
| 17(1) | 9(1)  | 2710.5 | 2645.1 | 0.8 |
| 17(1) | 10(1) | 2668.1 | 2604.5 | 0.3 |
| 17(1) | 11(1) | 2561.6 | 2499.3 | 0.1 |
| 17(1) | 12(1) | 2538.9 | 2482.3 | 0.1 |
| 17(1) | 13(1) | 2503.5 | 2442.1 | 1.1 |
| 17(1) | 14(1) | 2446.2 | 2391.2 | 0.8 |
| 17(1) | 15(1) | 2398.6 | 2343.1 | 0.4 |
| 17(1) | 16(1) | 2382.7 | 2325.6 | 0.4 |
| 18(1) | 1(1)  | 4948.3 | 4741.5 | 0.3 |
| 18(1) | 2(1)  | 4882.9 | 4678.6 | 0.1 |
| 18(1) | 3(1)  | 4352.0 | 4203.2 | 0.1 |
| 18(1) | 4(1)  | 4344.4 | 4193.6 | 0.1 |
| 18(1) | 5(1)  | 4304.2 | 4150.2 | 0.0 |
| 18(1) | 6(1)  | 2913.1 | 2860.6 | 0.2 |
| 18(1) | 7(1)  | 2800.0 | 2731.6 | 0.6 |
| 18(1) | 8(1)  | 2761.8 | 2700.3 | 0.0 |
| 18(1) | 9(1)  | 2675.6 | 2613.7 | 0.0 |
| 18(1) | 10(1) | 2633.2 | 2575.0 | 0.7 |
| 18(1) | 11(1) | 2526.7 | 2464.5 | 0.3 |
| 18(1) | 12(1) | 2504.0 | 2450.5 | 0.1 |
| 18(1) | 13(1) | 2468.6 | 2412.8 | 0.4 |
| 18(1) | 14(1) | 2411.3 | 2360.2 | 0.8 |
| 18(1) | 15(1) | 2363.7 | 2313.9 | 0.3 |
| 18(1) | 16(1) | 2347.8 | 2292.6 | 0.3 |

|       |       |        |        |     |
|-------|-------|--------|--------|-----|
| 18(1) | 17(1) | 2310.3 | 2261.8 | 0.1 |
| 19(1) | 1(1)  | 4917.9 | 4711.1 | 0.0 |
| 19(1) | 2(1)  | 4852.5 | 4649.5 | 0.0 |
| 19(1) | 3(1)  | 4321.6 | 4173.3 | 0.2 |
| 19(1) | 4(1)  | 4314.0 | 4163.3 | 0.1 |
| 19(1) | 5(1)  | 4273.8 | 4123.6 | 0.1 |
| 19(1) | 6(1)  | 2882.7 | 2829.3 | 0.4 |
| 19(1) | 7(1)  | 2769.6 | 2701.4 | 0.0 |
| 19(1) | 8(1)  | 2731.3 | 2669.3 | 0.0 |
| 19(1) | 9(1)  | 2645.2 | 2583.6 | 0.1 |
| 19(1) | 10(1) | 2602.8 | 2544.1 | 0.3 |
| 19(1) | 11(1) | 2496.3 | 2432.7 | 1.0 |
| 19(1) | 12(1) | 2473.6 | 2419.6 | 0.0 |
| 19(1) | 13(1) | 2438.2 | 2382.5 | 0.7 |
| 19(1) | 14(1) | 2380.9 | 2329.5 | 0.1 |
| 19(1) | 15(1) | 2333.3 | 2283.4 | 0.1 |
| 19(1) | 16(1) | 2317.4 | 2262.4 | 0.6 |
| 19(1) | 17(1) | 2279.9 | 2231.1 | 0.2 |
| 19(1) | 18(1) | 2245.0 | 2197.4 | 0.5 |
| 20(1) | 1(1)  | 4807.6 | 4601.3 | 0.0 |
| 20(1) | 2(1)  | 4742.2 | 4539.1 | 0.0 |
| 20(1) | 3(1)  | 4211.3 | 4064.0 | 0.0 |
| 20(1) | 4(1)  | 4203.7 | 4040.8 | 0.0 |
| 20(1) | 5(1)  | 4163.5 | 4010.0 | 0.0 |
| 20(1) | 6(1)  | 2772.4 | 2721.6 | 0.0 |
| 20(1) | 7(1)  | 2659.3 | 2593.5 | 0.0 |
| 20(1) | 8(1)  | 2621.1 | 2561.0 | 0.0 |
| 20(1) | 9(1)  | 2534.9 | 2474.9 | 0.0 |
| 20(1) | 10(1) | 2492.5 | 2436.1 | 0.0 |
| 20(1) | 11(1) | 2386.0 | 2327.8 | 0.0 |
| 20(1) | 12(1) | 2363.3 | 2311.0 | 0.0 |
| 20(1) | 13(1) | 2327.9 | 2274.2 | 0.0 |
| 20(1) | 14(1) | 2270.6 | 2219.2 | 0.0 |
| 20(1) | 15(1) | 2223.0 | 2175.2 | 0.0 |
| 20(1) | 16(1) | 2207.1 | 2154.5 | 0.0 |
| 20(1) | 17(1) | 2169.6 | 2121.8 | 0.0 |
| 20(1) | 18(1) | 2134.7 | 2090.0 | 0.0 |
| 20(1) | 19(1) | 2104.3 | 2059.5 | 0.0 |
| 21(1) | 1(1)  | 4801.9 | 4603.3 | 0.0 |
| 21(1) | 2(1)  | 4736.5 | 4540.5 | 0.0 |

|       |       |        |        |     |
|-------|-------|--------|--------|-----|
| 21(1) | 3(1)  | 4205.6 | 4063.2 | 0.1 |
| 21(1) | 4(1)  | 4198.0 | 4054.8 | 0.0 |
| 21(1) | 5(1)  | 4157.7 | 4014.5 | 0.4 |
| 21(1) | 6(1)  | 2766.7 | 2722.6 | 0.0 |
| 21(1) | 7(1)  | 2653.6 | 2593.6 | 0.0 |
| 21(1) | 8(1)  | 2615.3 | 2559.5 | 0.0 |
| 21(1) | 9(1)  | 2529.2 | 2475.2 | 0.5 |
| 21(1) | 10(1) | 2486.8 | 2435.6 | 0.1 |
| 21(1) | 11(1) | 2380.3 | 2329.6 | 0.0 |
| 21(1) | 12(1) | 2357.6 | 2312.7 | 0.4 |
| 21(1) | 13(1) | 2322.2 | 2273.4 | 1.0 |
| 21(1) | 14(1) | 2264.9 | 2221.8 | 0.1 |
| 21(1) | 15(1) | 2217.2 | 2175.0 | 0.1 |
| 21(1) | 16(1) | 2201.3 | 2156.4 | 0.1 |
| 21(1) | 17(1) | 2163.9 | 2122.5 | 0.2 |
| 21(1) | 18(1) | 2129.0 | 2091.9 | 0.3 |
| 21(1) | 19(1) | 2098.5 | 2060.9 | 0.2 |
| 21(1) | 20(1) | 1988.3 | 1951.8 | 0.0 |
| 22(1) | 1(1)  | 4689.4 | 4498.9 | 0.0 |
| 22(1) | 2(1)  | 4624.0 | 4436.7 | 0.0 |
| 22(1) | 3(1)  | 4093.1 | 3947.2 | 0.0 |
| 22(1) | 4(1)  | 4085.5 | 3952.3 | 0.0 |
| 22(1) | 5(1)  | 4045.3 | 3911.8 | 0.0 |
| 22(1) | 6(1)  | 2654.2 | 2619.0 | 0.0 |
| 22(1) | 7(1)  | 2541.1 | 2489.4 | 0.0 |
| 22(1) | 8(1)  | 2502.8 | 2458.0 | 0.0 |
| 22(1) | 9(1)  | 2416.7 | 2372.4 | 0.0 |
| 22(1) | 10(1) | 2374.3 | 2331.8 | 0.0 |
| 22(1) | 11(1) | 2267.8 | 2226.0 | 0.0 |
| 22(1) | 12(1) | 2245.1 | 2209.3 | 0.0 |
| 22(1) | 13(1) | 2209.7 | 2170.8 | 0.0 |
| 22(1) | 14(1) | 2152.4 | 2119.1 | 0.0 |
| 22(1) | 15(1) | 2104.8 | 2071.3 | 0.0 |
| 22(1) | 16(1) | 2088.8 | 2052.5 | 0.0 |
| 22(1) | 17(1) | 2051.4 | 2020.5 | 0.0 |
| 22(1) | 18(1) | 2016.5 | 1988.1 | 0.0 |
| 22(1) | 19(1) | 1986.1 | 1956.8 | 0.0 |
| 22(1) | 20(1) | 1875.8 | 1849.7 | 0.5 |
| 22(1) | 21(1) | 1870.0 | 1849.0 | 0.0 |
| 23(1) | 1(1)  | 4651.1 | 4454.8 | 0.0 |

|       |       |        |        |     |
|-------|-------|--------|--------|-----|
| 23(1) | 2(1)  | 4585.6 | 4392.9 | 0.0 |
| 23(1) | 3(1)  | 4054.8 | 3918.2 | 0.0 |
| 23(1) | 4(1)  | 4047.2 | 3907.5 | 0.0 |
| 23(1) | 5(1)  | 4006.9 | 3859.6 | 0.0 |
| 23(1) | 6(1)  | 2615.9 | 2574.5 | 0.0 |
| 23(1) | 7(1)  | 2502.7 | 2446.1 | 0.0 |
| 23(1) | 8(1)  | 2464.5 | 2414.5 | 0.0 |
| 23(1) | 9(1)  | 2378.3 | 2327.3 | 0.0 |
| 23(1) | 10(1) | 2335.9 | 2289.8 | 0.0 |
| 23(1) | 11(1) | 2229.5 | 2179.0 | 0.0 |
| 23(1) | 12(1) | 2206.8 | 2166.2 | 0.0 |
| 23(1) | 13(1) | 2171.3 | 2128.3 | 0.0 |
| 23(1) | 14(1) | 2114.1 | 2074.2 | 0.0 |
| 23(1) | 15(1) | 2066.4 | 2028.5 | 0.0 |
| 23(1) | 16(1) | 2050.5 | 2007.9 | 0.0 |
| 23(1) | 17(1) | 2013.0 | 1975.5 | 0.0 |
| 23(1) | 18(1) | 1978.1 | 1945.0 | 0.0 |
| 23(1) | 19(1) | 1947.7 | 1912.9 | 0.0 |
| 23(1) | 20(1) | 1837.4 | 1803.8 | 0.8 |
| 23(1) | 21(1) | 1831.7 | 1805.1 | 0.0 |
| 23(1) | 22(1) | 1719.2 | 1703.2 | 0.8 |
| 24(1) | 1(1)  | 4596.8 | 4401.7 | 0.0 |
| 24(1) | 2(1)  | 4531.4 | 4339.5 | 0.0 |
| 24(1) | 3(1)  | 4000.5 | 3863.8 | 0.0 |
| 24(1) | 4(1)  | 3992.9 | 3853.4 | 0.0 |
| 24(1) | 5(1)  | 3952.6 | 3811.3 | 0.0 |
| 24(1) | 6(1)  | 2561.6 | 2520.1 | 0.0 |
| 24(1) | 7(1)  | 2448.5 | 2394.0 | 0.0 |
| 24(1) | 8(1)  | 2410.2 | 2361.3 | 0.0 |
| 24(1) | 9(1)  | 2324.1 | 2275.2 | 0.0 |
| 24(1) | 10(1) | 2281.7 | 2236.2 | 0.0 |
| 24(1) | 11(1) | 2175.2 | 2125.2 | 0.0 |
| 24(1) | 12(1) | 2152.5 | 2111.0 | 0.0 |
| 24(1) | 13(1) | 2117.1 | 2073.9 | 0.0 |
| 24(1) | 14(1) | 2059.8 | 2021.8 | 0.0 |
| 24(1) | 15(1) | 2012.1 | 1976.3 | 0.0 |
| 24(1) | 16(1) | 1996.2 | 1953.5 | 0.0 |
| 24(1) | 17(1) | 1958.8 | 1920.5 | 0.0 |
| 24(1) | 18(1) | 1923.9 | 1890.3 | 0.0 |
| 24(1) | 19(1) | 1893.4 | 1859.2 | 0.0 |

|       |       |        |        |      |
|-------|-------|--------|--------|------|
| 24(1) | 20(1) | 1783.2 | 1750.3 | 1.1  |
| 24(1) | 21(1) | 1777.4 | 1751.8 | 0.0  |
| 24(1) | 22(1) | 1664.9 | 1649.4 | 24.5 |
| 24(1) | 23(1) | 1626.6 | 1605.0 | 9.3  |
| 25(1) | 1(1)  | 4568.9 | 4372.4 | 0.0  |
| 25(1) | 2(1)  | 4503.5 | 4309.3 | 0.0  |
| 25(1) | 3(1)  | 3972.6 | 3835.0 | 0.0  |
| 25(1) | 4(1)  | 3965.0 | 3825.2 | 0.1  |
| 25(1) | 5(1)  | 3924.8 | 3785.4 | 0.0  |
| 25(1) | 6(1)  | 2533.7 | 2491.6 | 0.1  |
| 25(1) | 7(1)  | 2420.6 | 2364.3 | 1.0  |
| 25(1) | 8(1)  | 2382.3 | 2331.7 | 0.5  |
| 25(1) | 9(1)  | 2296.2 | 2245.6 | 0.1  |
| 25(1) | 10(1) | 2253.8 | 2205.8 | 0.3  |
| 25(1) | 11(1) | 2147.3 | 2098.6 | 0.1  |
| 25(1) | 12(1) | 2124.6 | 2081.0 | 0.2  |
| 25(1) | 13(1) | 2089.2 | 2044.2 | 0.4  |
| 25(1) | 14(1) | 2031.9 | 1990.8 | 0.3  |
| 25(1) | 15(1) | 1984.3 | 1945.2 | 0.3  |
| 25(1) | 16(1) | 1968.4 | 1925.6 | 0.5  |
| 25(1) | 17(1) | 1930.9 | 1892.8 | 0.3  |
| 25(1) | 18(1) | 1896.0 | 1860.9 | 0.9  |
| 25(1) | 19(1) | 1865.6 | 1828.8 | 0.5  |
| 25(1) | 20(1) | 1755.3 | 1720.8 | 0.0  |
| 25(1) | 21(1) | 1749.5 | 1722.3 | 0.4  |
| 25(1) | 22(1) | 1637.1 | 1618.7 | 0.0  |
| 25(1) | 23(1) | 1598.7 | 1574.6 | 0.0  |
| 25(1) | 24(1) | 1544.4 | 1521.1 | 0.0  |
| 26(1) | 1(1)  | 4554.7 | 4358.1 | 0.0  |
| 26(1) | 2(1)  | 4489.3 | 4293.3 | 0.1  |
| 26(1) | 3(1)  | 3958.4 | 3820.7 | 0.0  |
| 26(1) | 4(1)  | 3950.8 | 3811.1 | 0.1  |
| 26(1) | 5(1)  | 3910.6 | 3771.0 | 0.1  |
| 26(1) | 6(1)  | 2519.5 | 2476.1 | 0.1  |
| 26(1) | 7(1)  | 2406.4 | 2349.9 | 0.0  |
| 26(1) | 8(1)  | 2368.1 | 2317.4 | 0.1  |
| 26(1) | 9(1)  | 2282.0 | 2230.9 | 0.4  |
| 26(1) | 10(1) | 2239.6 | 2192.0 | 0.0  |
| 26(1) | 11(1) | 2133.1 | 2084.1 | 0.6  |
| 26(1) | 12(1) | 2110.4 | 2068.5 | 0.0  |



|       |       |        |        |     |
|-------|-------|--------|--------|-----|
| 26(1) | 13(1) | 2075.0 | 2029.2 | 0.3 |
| 26(1) | 14(1) | 2017.7 | 1977.1 | 0.1 |
| 26(1) | 15(1) | 1970.1 | 1931.1 | 0.0 |
| 26(1) | 16(1) | 1954.1 | 1910.9 | 1.9 |
| 26(1) | 17(1) | 1916.7 | 1878.4 | 0.8 |
| 26(1) | 18(1) | 1881.8 | 1846.1 | 0.3 |
| 26(1) | 19(1) | 1851.3 | 1815.9 | 1.0 |
| 26(1) | 20(1) | 1741.1 | 1706.5 | 0.0 |
| 26(1) | 21(1) | 1735.3 | 1708.2 | 0.0 |
| 26(1) | 22(1) | 1622.8 | 1604.4 | 0.0 |
| 26(1) | 23(1) | 1584.5 | 1560.3 | 0.0 |
| 26(1) | 24(1) | 1530.2 | 1506.6 | 0.0 |
| 26(1) | 25(1) | 1502.3 | 1477.8 | 8.1 |
| 27(1) | 1(1)  | 4522.9 | 4325.2 | 0.0 |
| 27(1) | 2(1)  | 4457.4 | 4263.0 | 0.1 |
| 27(1) | 3(1)  | 3926.6 | 3786.3 | 0.0 |
| 27(1) | 4(1)  | 3918.9 | 3778.4 | 0.0 |
| 27(1) | 5(1)  | 3878.7 | 3737.6 | 0.0 |
| 27(1) | 6(1)  | 2487.6 | 2444.3 | 0.0 |
| 27(1) | 7(1)  | 2374.5 | 2316.7 | 0.0 |
| 27(1) | 8(1)  | 2336.3 | 2284.2 | 0.0 |
| 27(1) | 9(1)  | 2250.1 | 2197.6 | 0.0 |
| 27(1) | 10(1) | 2207.7 | 2158.9 | 0.0 |
| 27(1) | 11(1) | 2101.2 | 2053.8 | 0.0 |
| 27(1) | 12(1) | 2078.6 | 2034.4 | 0.0 |
| 27(1) | 13(1) | 2043.1 | 1998.9 | 0.0 |
| 27(1) | 14(1) | 1985.8 | 1942.7 | 0.0 |
| 27(1) | 15(1) | 1938.2 | 1897.9 | 0.0 |
| 27(1) | 16(1) | 1922.3 | 1876.2 | 0.0 |
| 27(1) | 17(1) | 1884.8 | 1845.2 | 0.0 |
| 27(1) | 18(1) | 1849.9 | 1812.9 | 0.0 |
| 27(1) | 19(1) | 1819.5 | 1782.3 | 0.0 |
| 27(1) | 20(1) | 1709.2 | 1675.0 | 0.1 |
| 27(1) | 21(1) | 1703.5 | 1674.6 | 0.0 |
| 27(1) | 22(1) | 1591.0 | 1572.7 | 1.3 |
| 27(1) | 23(1) | 1552.7 | 1529.3 | 1.3 |
| 27(1) | 24(1) | 1498.4 | 1476.1 | 9.5 |
| 27(1) | 25(1) | 1470.5 | 1444.3 | 0.0 |
| 27(1) | 26(1) | 1456.3 | 1430.2 | 0.0 |
| 28(1) | 1(1)  | 4464.9 | 4269.4 | 0.0 |

|       |       |        |        |      |
|-------|-------|--------|--------|------|
| 28(1) | 2(1)  | 4399.5 | 4207.2 | 0.1  |
| 28(1) | 3(1)  | 3868.6 | 3731.9 | 0.0  |
| 28(1) | 4(1)  | 3861.0 | 3722.6 | 0.0  |
| 28(1) | 5(1)  | 3820.8 | 3680.5 | 0.0  |
| 28(1) | 6(1)  | 2429.7 | 2389.3 | 0.0  |
| 28(1) | 7(1)  | 2316.6 | 2262.4 | 0.0  |
| 28(1) | 8(1)  | 2278.3 | 2228.3 | 0.0  |
| 28(1) | 9(1)  | 2192.2 | 2142.5 | 0.0  |
| 28(1) | 10(1) | 2149.8 | 2102.5 | 0.0  |
| 28(1) | 11(1) | 2043.3 | 1997.2 | 0.0  |
| 28(1) | 12(1) | 2020.6 | 1979.1 | 0.0  |
| 28(1) | 13(1) | 1985.2 | 1941.1 | 0.0  |
| 28(1) | 14(1) | 1927.9 | 1889.2 | 0.0  |
| 28(1) | 15(1) | 1880.3 | 1843.0 | 0.0  |
| 28(1) | 16(1) | 1864.4 | 1822.3 | 0.0  |
| 28(1) | 17(1) | 1826.9 | 1789.9 | 0.0  |
| 28(1) | 18(1) | 1792.0 | 1760.8 | 0.0  |
| 28(1) | 19(1) | 1761.6 | 1727.0 | 0.0  |
| 28(1) | 20(1) | 1651.3 | 1616.8 | 41.6 |
| 28(1) | 21(1) | 1645.5 | 1618.5 | 0.0  |
| 28(1) | 22(1) | 1533.0 | 1520.3 | 0.6  |
| 28(1) | 23(1) | 1494.7 | 1472.4 | 0.6  |
| 28(1) | 24(1) | 1440.4 | 1419.4 | 0.3  |
| 28(1) | 25(1) | 1412.6 | 1388.9 | 0.0  |
| 28(1) | 26(1) | 1398.3 | 1374.5 | 0.0  |
| 28(1) | 27(1) | 1366.5 | 1341.4 | 10.6 |
| 29(1) | 1(1)  | 4424.5 | 4235.0 | 0.0  |
| 29(1) | 2(1)  | 4359.0 | 4172.0 | 0.0  |
| 29(1) | 3(1)  | 3828.2 | 3697.3 | 0.1  |
| 29(1) | 4(1)  | 3820.6 | 3688.1 | 0.0  |
| 29(1) | 5(1)  | 3780.3 | 3647.6 | 0.0  |
| 29(1) | 6(1)  | 2389.3 | 2352.0 | 0.0  |
| 29(1) | 7(1)  | 2276.1 | 2226.5 | 0.0  |
| 29(1) | 8(1)  | 2237.9 | 2194.5 | 0.0  |
| 29(1) | 9(1)  | 2151.7 | 2107.5 | 0.0  |
| 29(1) | 10(1) | 2109.3 | 2069.2 | 0.0  |
| 29(1) | 11(1) | 2002.9 | 1962.0 | 0.0  |
| 29(1) | 12(1) | 1980.2 | 1945.4 | 0.1  |
| 29(1) | 13(1) | 1944.7 | 1906.4 | 0.1  |
| 29(1) | 14(1) | 1887.5 | 1854.2 | 0.3  |

|       |       |        |        |     |
|-------|-------|--------|--------|-----|
| 29(1) | 15(1) | 1839.8 | 1806.3 | 0.3 |
| 29(1) | 16(1) | 1823.9 | 1788.4 | 2.9 |
| 29(1) | 17(1) | 1786.4 | 1755.3 | 1.4 |
| 29(1) | 18(1) | 1751.5 | 1723.3 | 1.4 |
| 29(1) | 19(1) | 1721.1 | 1692.2 | 0.7 |
| 29(1) | 20(1) | 1610.8 | 1583.4 | 0.0 |
| 29(1) | 21(1) | 1605.1 | 1585.0 | 0.7 |
| 29(1) | 22(1) | 1492.6 | 1481.2 | 0.0 |
| 29(1) | 23(1) | 1454.3 | 1437.4 | 0.0 |
| 29(1) | 24(1) | 1400.0 | 1383.9 | 0.0 |
| 29(1) | 25(1) | 1372.1 | 1355.2 | 1.4 |
| 29(1) | 26(1) | 1357.9 | 1339.0 | 3.8 |
| 29(1) | 27(1) | 1326.1 | 1306.2 | 0.0 |
| 29(1) | 28(1) | 1268.1 | 1251.2 | 0.0 |
| 30(1) | 1(1)  | 4405.4 | 4200.0 | 0.0 |
| 30(1) | 2(1)  | 4340.0 | 4137.7 | 0.9 |
| 30(1) | 3(1)  | 3809.1 | 3662.7 | 0.0 |
| 30(1) | 4(1)  | 3801.5 | 3653.4 | 0.0 |
| 30(1) | 5(1)  | 3761.3 | 3613.0 | 0.0 |
| 30(1) | 6(1)  | 2370.2 | 2319.7 | 0.1 |
| 30(1) | 7(1)  | 2257.1 | 2192.5 | 0.0 |
| 30(1) | 8(1)  | 2218.9 | 2160.1 | 0.0 |
| 30(1) | 9(1)  | 2132.7 | 2073.8 | 0.0 |
| 30(1) | 10(1) | 2090.3 | 2034.8 | 0.0 |
| 30(1) | 11(1) | 1983.8 | 1929.2 | 0.0 |
| 30(1) | 12(1) | 1961.1 | 1909.2 | 0.0 |
| 30(1) | 13(1) | 1925.7 | 1873.9 | 0.0 |
| 30(1) | 14(1) | 1868.4 | 1818.0 | 0.0 |
| 30(1) | 15(1) | 1820.8 | 1773.9 | 0.0 |
| 30(1) | 16(1) | 1804.9 | 1756.5 | 0.0 |
| 30(1) | 17(1) | 1767.4 | 1720.3 | 0.0 |
| 30(1) | 18(1) | 1732.5 | 1688.2 | 0.0 |
| 30(1) | 19(1) | 1702.1 | 1656.1 | 0.0 |
| 30(1) | 20(1) | 1591.8 | 1549.1 | 0.0 |
| 30(1) | 21(1) | 1586.1 | 1550.4 | 0.0 |
| 30(1) | 22(1) | 1473.6 | 1446.4 | 4.8 |
| 30(1) | 23(1) | 1435.3 | 1405.0 | 0.4 |
| 30(1) | 24(1) | 1381.0 | 1335.5 | 0.1 |
| 30(1) | 25(1) | 1353.1 | 1319.4 | 0.0 |
| 30(1) | 26(1) | 1338.9 | 1305.6 | 0.0 |

|       |       |        |        |       |
|-------|-------|--------|--------|-------|
| 30(1) | 27(1) | 1307.0 | 1264.2 | 100.8 |
| 30(1) | 28(1) | 1249.1 | 1213.7 | 7.2   |
| 30(1) | 29(1) | 1208.7 | 1181.5 | 0.0   |
| 31(1) | 1(1)  | 4398.1 | 4207.3 | 0.0   |
| 31(1) | 2(1)  | 4332.6 | 4143.6 | 0.1   |
| 31(1) | 3(1)  | 3801.8 | 3669.8 | 0.0   |
| 31(1) | 4(1)  | 3794.2 | 3660.6 | 0.0   |
| 31(1) | 5(1)  | 3753.9 | 3619.9 | 0.1   |
| 31(1) | 6(1)  | 2362.9 | 2325.9 | 0.0   |
| 31(1) | 7(1)  | 2249.7 | 2198.8 | 0.0   |
| 31(1) | 8(1)  | 2211.5 | 2166.6 | 0.0   |
| 31(1) | 9(1)  | 2125.3 | 2080.0 | 0.1   |
| 31(1) | 10(1) | 2082.9 | 2041.2 | 0.0   |
| 31(1) | 11(1) | 1976.5 | 1932.6 | 0.3   |
| 31(1) | 12(1) | 1953.8 | 1917.0 | 0.2   |
| 31(1) | 13(1) | 1918.3 | 1879.0 | 0.2   |
| 31(1) | 14(1) | 1861.1 | 1826.3 | 0.1   |
| 31(1) | 15(1) | 1813.4 | 1780.4 | 0.0   |
| 31(1) | 16(1) | 1797.5 | 1760.6 | 2.2   |
| 31(1) | 17(1) | 1760.0 | 1727.4 | 0.3   |
| 31(1) | 18(1) | 1725.1 | 1696.2 | 0.6   |
| 31(1) | 19(1) | 1694.7 | 1664.7 | 3.7   |
| 31(1) | 20(1) | 1584.4 | 1555.7 | 0.0   |
| 31(1) | 21(1) | 1578.7 | 1556.6 | 1.5   |
| 31(1) | 22(1) | 1466.2 | 1453.3 | 0.0   |
| 31(1) | 23(1) | 1427.9 | 1409.7 | 0.0   |
| 31(1) | 24(1) | 1373.6 | 1356.1 | 0.0   |
| 31(1) | 25(1) | 1345.7 | 1326.4 | 1.1   |
| 31(1) | 26(1) | 1331.5 | 1312.5 | 0.1   |
| 31(1) | 27(1) | 1299.7 | 1279.5 | 0.0   |
| 31(1) | 28(1) | 1241.7 | 1223.9 | 0.0   |
| 31(1) | 29(1) | 1201.3 | 1189.2 | 0.3   |
| 31(1) | 30(1) | 1182.2 | 1154.6 | 0.0   |
| 32(1) | 1(1)  | 4340.8 | 4154.3 | 0.0   |
| 32(1) | 2(1)  | 4275.4 | 4091.5 | 0.0   |
| 32(1) | 3(1)  | 3744.6 | 3616.9 | 0.1   |
| 32(1) | 4(1)  | 3736.9 | 3607.4 | 0.0   |
| 32(1) | 5(1)  | 3696.7 | 3566.7 | 0.0   |
| 32(1) | 6(1)  | 2305.6 | 2273.7 | 0.0   |
| 32(1) | 7(1)  | 2192.5 | 2144.9 | 0.3   |

|       |       |        |        |      |
|-------|-------|--------|--------|------|
| 32(1) | 8(1)  | 2154.3 | 2113.0 | 0.0  |
| 32(1) | 9(1)  | 2068.1 | 2027.5 | 0.0  |
| 32(1) | 10(1) | 2025.7 | 1986.5 | 0.1  |
| 32(1) | 11(1) | 1919.2 | 1880.9 | 0.0  |
| 32(1) | 12(1) | 1896.5 | 1863.7 | 0.1  |
| 32(1) | 13(1) | 1861.1 | 1826.1 | 0.1  |
| 32(1) | 14(1) | 1803.8 | 1773.1 | 0.2  |
| 32(1) | 15(1) | 1756.2 | 1726.9 | 1.3  |
| 32(1) | 16(1) | 1740.3 | 1707.7 | 0.3  |
| 32(1) | 17(1) | 1702.8 | 1675.0 | 3.2  |
| 32(1) | 18(1) | 1667.9 | 1644.5 | 0.1  |
| 32(1) | 19(1) | 1637.5 | 1612.8 | 4.4  |
| 32(1) | 20(1) | 1527.2 | 1502.7 | 0.0  |
| 32(1) | 21(1) | 1521.5 | 1504.6 | 10.1 |
| 32(1) | 22(1) | 1409.0 | 1400.2 | 0.0  |
| 32(1) | 23(1) | 1370.7 | 1356.6 | 0.0  |
| 32(1) | 24(1) | 1316.4 | 1303.1 | 0.0  |
| 32(1) | 25(1) | 1288.5 | 1273.7 | 0.0  |
| 32(1) | 26(1) | 1274.3 | 1259.3 | 0.3  |
| 32(1) | 27(1) | 1242.4 | 1226.3 | 0.0  |
| 32(1) | 28(1) | 1184.5 | 1170.6 | 0.0  |
| 32(1) | 29(1) | 1144.1 | 1136.3 | 16.5 |
| 32(1) | 30(1) | 1125.0 | 1101.2 | 0.0  |
| 32(1) | 31(1) | 1117.7 | 1108.3 | 0.2  |
| 33(1) | 1(1)  | 4284.5 | 4093.0 | 0.0  |
| 33(1) | 2(1)  | 4219.0 | 4030.1 | 0.0  |
| 33(1) | 3(1)  | 3688.2 | 3555.1 | 0.0  |
| 33(1) | 4(1)  | 3680.6 | 3545.2 | 0.0  |
| 33(1) | 5(1)  | 3640.3 | 3505.2 | 0.0  |
| 33(1) | 6(1)  | 2249.3 | 2212.3 | 0.0  |
| 33(1) | 7(1)  | 2136.1 | 2084.1 | 0.0  |
| 33(1) | 8(1)  | 2097.9 | 2052.0 | 0.0  |
| 33(1) | 9(1)  | 2011.7 | 1965.9 | 0.0  |
| 33(1) | 10(1) | 1969.3 | 1927.7 | 0.0  |
| 33(1) | 11(1) | 1862.9 | 1819.4 | 0.0  |
| 33(1) | 12(1) | 1840.2 | 1802.1 | 0.0  |
| 33(1) | 13(1) | 1804.7 | 1765.5 | 0.0  |
| 33(1) | 14(1) | 1747.4 | 1711.6 | 0.0  |
| 33(1) | 15(1) | 1699.8 | 1666.0 | 0.0  |
| 33(1) | 16(1) | 1683.9 | 1646.0 | 0.0  |

|       |       |        |        |      |
|-------|-------|--------|--------|------|
| 33(1) | 17(1) | 1646.4 | 1612.6 | 0.0  |
| 33(1) | 18(1) | 1611.5 | 1583.2 | 0.0  |
| 33(1) | 19(1) | 1581.1 | 1550.1 | 0.0  |
| 33(1) | 20(1) | 1470.8 | 1440.0 | 5.0  |
| 33(1) | 21(1) | 1465.1 | 1442.6 | 0.0  |
| 33(1) | 22(1) | 1352.6 | 1338.1 | 0.2  |
| 33(1) | 23(1) | 1314.3 | 1294.9 | 7.7  |
| 33(1) | 24(1) | 1260.0 | 1240.5 | 5.4  |
| 33(1) | 25(1) | 1232.1 | 1211.5 | 0.0  |
| 33(1) | 26(1) | 1217.9 | 1197.2 | 0.0  |
| 33(1) | 27(1) | 1186.1 | 1166.0 | 1.3  |
| 33(1) | 28(1) | 1128.1 | 1106.4 | 83.4 |
| 33(1) | 29(1) | 1087.7 | 1074.8 | 0.0  |
| 33(1) | 30(1) | 1068.6 | 1039.3 | 0.1  |
| 33(1) | 31(1) | 1061.3 | 1046.8 | 0.0  |
| 33(1) | 32(1) | 1004.1 | 994.1  | 0.0  |
| 34(1) | 1(1)  | 4216.9 | 4031.2 | 0.0  |
| 34(1) | 2(1)  | 4151.4 | 3968.1 | 0.0  |
| 34(1) | 3(1)  | 3620.6 | 3493.9 | 0.0  |
| 34(1) | 4(1)  | 3612.9 | 3484.4 | 0.0  |
| 34(1) | 5(1)  | 3572.7 | 3443.8 | 0.0  |
| 34(1) | 6(1)  | 2181.6 | 2150.2 | 0.0  |
| 34(1) | 7(1)  | 2068.5 | 2022.7 | 0.0  |
| 34(1) | 8(1)  | 2030.3 | 1990.8 | 0.0  |
| 34(1) | 9(1)  | 1944.1 | 1904.4 | 0.0  |
| 34(1) | 10(1) | 1901.7 | 1865.0 | 0.2  |
| 34(1) | 11(1) | 1795.2 | 1757.1 | 1.4  |
| 34(1) | 12(1) | 1772.5 | 1742.1 | 1.3  |
| 34(1) | 13(1) | 1737.1 | 1703.1 | 1.6  |
| 34(1) | 14(1) | 1679.8 | 1650.5 | 0.3  |
| 34(1) | 15(1) | 1632.2 | 1604.3 | 3.5  |
| 34(1) | 16(1) | 1616.3 | 1584.3 | 3.2  |
| 34(1) | 17(1) | 1578.8 | 1551.8 | 0.7  |
| 34(1) | 18(1) | 1543.9 | 1520.1 | 0.6  |
| 34(1) | 19(1) | 1513.5 | 1489.1 | 1.3  |
| 34(1) | 20(1) | 1403.2 | 1379.5 | 0.0  |
| 34(1) | 21(1) | 1397.5 | 1381.0 | 1.6  |
| 34(1) | 22(1) | 1285.0 | 1277.2 | 0.0  |
| 34(1) | 23(1) | 1246.7 | 1233.7 | 0.0  |
| 34(1) | 24(1) | 1192.4 | 1180.0 | 0.0  |

|       |       |        |        |      |
|-------|-------|--------|--------|------|
| 34(1) | 25(1) | 1164.5 | 1149.7 | 0.6  |
| 34(1) | 26(1) | 1150.3 | 1136.2 | 5.4  |
| 34(1) | 27(1) | 1118.5 | 1103.3 | 0.0  |
| 34(1) | 28(1) | 1060.5 | 1047.7 | 0.0  |
| 34(1) | 29(1) | 1020.1 | 1013.3 | 0.2  |
| 34(1) | 30(1) | 1001.0 | 978.1  | 0.0  |
| 34(1) | 31(1) | 993.7  | 985.3  | 2.5  |
| 34(1) | 32(1) | 936.4  | 932.3  | 0.1  |
| 34(1) | 33(1) | 880.1  | 871.3  | 8.6  |
| 35(1) | 1(1)  | 4206.2 | 3979.9 | 1.3  |
| 35(1) | 2(1)  | 4140.7 | 3926.9 | 0.0  |
| 35(1) | 3(1)  | 3609.9 | 3452.3 | 0.0  |
| 35(1) | 4(1)  | 3602.3 | 3442.9 | 0.0  |
| 35(1) | 5(1)  | 3562.0 | 3406.0 | 0.0  |
| 35(1) | 6(1)  | 2171.0 | 2109.8 | 0.0  |
| 35(1) | 7(1)  | 2057.8 | 1982.0 | 0.0  |
| 35(1) | 8(1)  | 2019.6 | 1948.5 | 0.0  |
| 35(1) | 9(1)  | 1933.4 | 1862.9 | 0.0  |
| 35(1) | 10(1) | 1891.0 | 1821.9 | 0.0  |
| 35(1) | 11(1) | 1784.6 | 1716.1 | 0.0  |
| 35(1) | 12(1) | 1761.9 | 1700.3 | 0.0  |
| 35(1) | 13(1) | 1726.4 | 1657.4 | 0.0  |
| 35(1) | 14(1) | 1669.2 | 1609.8 | 0.0  |
| 35(1) | 15(1) | 1621.5 | 1568.0 | 0.0  |
| 35(1) | 16(1) | 1605.6 | 1543.8 | 0.0  |
| 35(1) | 17(1) | 1568.2 | 1508.0 | 0.0  |
| 35(1) | 18(1) | 1533.2 | 1477.9 | 0.0  |
| 35(1) | 19(1) | 1502.8 | 1448.0 | 0.0  |
| 35(1) | 20(1) | 1392.5 | 1339.6 | 4.6  |
| 35(1) | 21(1) | 1386.8 | 1340.2 | 0.0  |
| 35(1) | 22(1) | 1274.3 | 1237.9 | 0.2  |
| 35(1) | 23(1) | 1236.0 | 1189.0 | 5.6  |
| 35(1) | 24(1) | 1181.7 | 1140.1 | 15.0 |
| 35(1) | 25(1) | 1153.8 | 1107.5 | 0.0  |
| 35(1) | 26(1) | 1139.6 | 1093.4 | 0.0  |
| 35(1) | 27(1) | 1107.8 | 1061.4 | 2.1  |
| 35(1) | 28(1) | 1049.8 | 1003.8 | 3.1  |
| 35(1) | 29(1) | 1009.4 | 972.1  | 0.0  |
| 35(1) | 30(1) | 990.4  | 936.2  | 15.3 |
| 35(1) | 31(1) | 983.0  | 943.0  | 0.0  |

|       |       |        |        |     |
|-------|-------|--------|--------|-----|
| 35(1) | 32(1) | 925.8  | 891.2  | 0.1 |
| 35(1) | 33(1) | 869.4  | 829.6  | 0.5 |
| 35(1) | 34(1) | 801.8  | 768.1  | 0.1 |
| 36(1) | 1(1)  | 4167.0 | 3981.7 | 0.0 |
| 36(1) | 2(1)  | 4101.6 | 3918.5 | 0.0 |
| 36(1) | 3(1)  | 3570.7 | 3444.0 | 0.0 |
| 36(1) | 4(1)  | 3563.1 | 3434.5 | 0.0 |
| 36(1) | 5(1)  | 3522.9 | 3394.1 | 0.0 |
| 36(1) | 6(1)  | 2131.8 | 2101.4 | 0.2 |
| 36(1) | 7(1)  | 2018.7 | 1973.6 | 0.3 |
| 36(1) | 8(1)  | 1980.5 | 1941.2 | 0.0 |
| 36(1) | 9(1)  | 1894.3 | 1854.6 | 0.1 |
| 36(1) | 10(1) | 1851.9 | 1815.5 | 0.3 |
| 36(1) | 11(1) | 1745.4 | 1706.6 | 1.6 |
| 36(1) | 12(1) | 1722.7 | 1691.4 | 0.2 |
| 36(1) | 13(1) | 1687.3 | 1652.9 | 1.0 |
| 36(1) | 14(1) | 1630.0 | 1600.4 | 0.3 |
| 36(1) | 15(1) | 1582.4 | 1554.4 | 0.4 |
| 36(1) | 16(1) | 1566.5 | 1535.0 | 0.2 |
| 36(1) | 17(1) | 1529.0 | 1501.8 | 0.0 |
| 36(1) | 18(1) | 1494.1 | 1470.5 | 0.2 |
| 36(1) | 19(1) | 1463.7 | 1438.7 | 1.8 |
| 36(1) | 20(1) | 1353.4 | 1329.7 | 0.0 |
| 36(1) | 21(1) | 1347.7 | 1331.6 | 7.3 |
| 36(1) | 22(1) | 1235.2 | 1227.5 | 0.0 |
| 36(1) | 23(1) | 1196.8 | 1183.8 | 0.0 |
| 36(1) | 24(1) | 1142.6 | 1130.1 | 0.0 |
| 36(1) | 25(1) | 1114.7 | 1100.9 | 3.6 |
| 36(1) | 26(1) | 1100.5 | 1084.9 | 0.8 |
| 36(1) | 27(1) | 1068.6 | 1053.3 | 0.0 |
| 36(1) | 28(1) | 1010.7 | 997.9  | 0.0 |
| 36(1) | 29(1) | 970.2  | 963.1  | 0.0 |
| 36(1) | 30(1) | 951.2  | 928.1  | 0.0 |
| 36(1) | 31(1) | 943.8  | 935.3  | 0.0 |
| 36(1) | 32(1) | 886.6  | 882.4  | 0.0 |
| 36(1) | 33(1) | 830.2  | 820.8  | 0.0 |
| 36(1) | 34(1) | 762.6  | 760.2  | 0.7 |
| 36(1) | 35(1) | 751.9  | 718.9  | 0.0 |
| 37(1) | 1(1)  | 4132.9 | 3948.1 | 0.0 |
| 37(1) | 2(1)  | 4067.5 | 3884.8 | 0.0 |



|       |       |        |        |      |
|-------|-------|--------|--------|------|
| 37(1) | 3(1)  | 3536.6 | 3410.2 | 0.0  |
| 37(1) | 4(1)  | 3529.0 | 3400.9 | 0.0  |
| 37(1) | 5(1)  | 3488.8 | 3360.3 | 0.0  |
| 37(1) | 6(1)  | 2097.7 | 2066.9 | 0.0  |
| 37(1) | 7(1)  | 1984.6 | 1937.5 | 0.0  |
| 37(1) | 8(1)  | 1946.4 | 1907.2 | 0.0  |
| 37(1) | 9(1)  | 1860.2 | 1822.0 | 0.3  |
| 37(1) | 10(1) | 1817.8 | 1781.5 | 0.1  |
| 37(1) | 11(1) | 1711.3 | 1674.1 | 0.0  |
| 37(1) | 12(1) | 1688.6 | 1660.6 | 29.6 |
| 37(1) | 13(1) | 1653.2 | 1619.5 | 3.1  |
| 37(1) | 14(1) | 1595.9 | 1566.3 | 0.2  |
| 37(1) | 15(1) | 1548.3 | 1520.7 | 0.3  |
| 37(1) | 16(1) | 1532.4 | 1500.2 | 8.2  |
| 37(1) | 17(1) | 1494.9 | 1468.6 | 0.0  |
| 37(1) | 18(1) | 1460.0 | 1436.5 | 0.8  |
| 37(1) | 19(1) | 1429.6 | 1405.3 | 0.1  |
| 37(1) | 20(1) | 1319.3 | 1296.1 | 0.0  |
| 37(1) | 21(1) | 1313.6 | 1297.2 | 0.8  |
| 37(1) | 22(1) | 1201.1 | 1193.7 | 0.0  |
| 37(1) | 23(1) | 1162.8 | 1150.0 | 0.0  |
| 37(1) | 24(1) | 1108.5 | 1096.5 | 0.0  |
| 37(1) | 25(1) | 1080.6 | 1066.8 | 0.0  |
| 37(1) | 26(1) | 1066.4 | 1052.4 | 0.2  |
| 37(1) | 27(1) | 1034.5 | 1019.4 | 0.0  |
| 37(1) | 28(1) | 976.6  | 964.0  | 0.0  |
| 37(1) | 29(1) | 936.2  | 929.3  | 0.0  |
| 37(1) | 30(1) | 917.1  | 894.5  | 0.0  |
| 37(1) | 31(1) | 909.7  | 901.8  | 0.0  |
| 37(1) | 32(1) | 852.5  | 850.0  | 0.0  |
| 37(1) | 33(1) | 796.1  | 787.1  | 0.0  |
| 37(1) | 34(1) | 728.5  | 725.7  | 0.2  |
| 37(1) | 35(1) | 717.9  | 686.0  | 0.2  |
| 37(1) | 36(1) | 678.7  | 675.5  | 0.0  |
| 38(1) | 1(1)  | 4104.1 | 3915.1 | 0.0  |
| 38(1) | 2(1)  | 4038.7 | 3853.0 | 0.1  |
| 38(1) | 3(1)  | 3507.8 | 3378.2 | 0.0  |
| 38(1) | 4(1)  | 3500.2 | 3368.7 | 0.0  |
| 38(1) | 5(1)  | 3459.9 | 3328.2 | 0.0  |
| 38(1) | 6(1)  | 2068.9 | 2035.1 | 0.0  |

|       |       |        |        |      |
|-------|-------|--------|--------|------|
| 38(1) | 7(1)  | 1955.8 | 1907.7 | 0.0  |
| 38(1) | 8(1)  | 1917.5 | 1875.2 | 0.0  |
| 38(1) | 9(1)  | 1831.3 | 1789.0 | 0.0  |
| 38(1) | 10(1) | 1789.0 | 1749.8 | 0.0  |
| 38(1) | 11(1) | 1682.5 | 1642.0 | 0.0  |
| 38(1) | 12(1) | 1659.8 | 1625.7 | 0.0  |
| 38(1) | 13(1) | 1624.4 | 1587.9 | 0.0  |
| 38(1) | 14(1) | 1567.1 | 1532.9 | 0.0  |
| 38(1) | 15(1) | 1519.4 | 1489.0 | 0.0  |
| 38(1) | 16(1) | 1503.5 | 1468.7 | 0.0  |
| 38(1) | 17(1) | 1466.1 | 1435.7 | 0.0  |
| 38(1) | 18(1) | 1431.2 | 1404.8 | 0.0  |
| 38(1) | 19(1) | 1400.7 | 1373.6 | 0.0  |
| 38(1) | 20(1) | 1290.4 | 1265.8 | 4.7  |
| 38(1) | 21(1) | 1284.7 | 1265.4 | 0.0  |
| 38(1) | 22(1) | 1172.2 | 1162.2 | 1.1  |
| 38(1) | 23(1) | 1133.9 | 1117.0 | 83.9 |
| 38(1) | 24(1) | 1079.6 | 1063.9 | 0.8  |
| 38(1) | 25(1) | 1051.7 | 1035.0 | 0.0  |
| 38(1) | 26(1) | 1037.5 | 1019.8 | 0.0  |
| 38(1) | 27(1) | 1005.7 | 987.5  | 0.1  |
| 38(1) | 28(1) | 947.7  | 932.1  | 0.2  |
| 38(1) | 29(1) | 907.3  | 897.3  | 0.0  |
| 38(1) | 30(1) | 888.3  | 862.5  | 0.1  |
| 38(1) | 31(1) | 880.9  | 870.0  | 1.2  |
| 38(1) | 32(1) | 823.7  | 816.1  | 0.1  |
| 38(1) | 33(1) | 767.3  | 755.9  | 0.6  |
| 38(1) | 34(1) | 699.7  | 695.2  | 0.0  |
| 38(1) | 35(1) | 689.0  | 652.5  | 0.3  |
| 38(1) | 36(1) | 649.8  | 644.4  | 0.0  |
| 38(1) | 37(1) | 615.8  | 609.8  | 0.1  |
| 39(1) | 1(1)  | 4035.6 | 3848.8 | 0.1  |
| 39(1) | 2(1)  | 3970.2 | 3785.8 | 0.0  |
| 39(1) | 3(1)  | 3439.4 | 3310.9 | 0.0  |
| 39(1) | 4(1)  | 3431.7 | 3301.6 | 0.0  |
| 39(1) | 5(1)  | 3391.5 | 3261.2 | 0.0  |
| 39(1) | 6(1)  | 2000.4 | 1968.2 | 0.0  |
| 39(1) | 7(1)  | 1887.3 | 1840.5 | 0.0  |
| 39(1) | 8(1)  | 1849.1 | 1808.5 | 0.0  |
| 39(1) | 9(1)  | 1762.9 | 1722.1 | 0.0  |

|       |       |        |        |     |
|-------|-------|--------|--------|-----|
| 39(1) | 10(1) | 1720.5 | 1682.7 | 0.1 |
| 39(1) | 11(1) | 1614.0 | 1575.1 | 0.0 |
| 39(1) | 12(1) | 1591.3 | 1558.4 | 0.0 |
| 39(1) | 13(1) | 1555.9 | 1520.6 | 0.2 |
| 39(1) | 14(1) | 1498.6 | 1467.6 | 0.0 |
| 39(1) | 15(1) | 1451.0 | 1421.8 | 0.1 |
| 39(1) | 16(1) | 1435.1 | 1401.8 | 0.0 |
| 39(1) | 17(1) | 1397.6 | 1368.8 | 0.0 |
| 39(1) | 18(1) | 1362.7 | 1337.3 | 0.0 |
| 39(1) | 19(1) | 1332.3 | 1306.3 | 0.0 |
| 39(1) | 20(1) | 1222.0 | 1196.6 | 3.6 |
| 39(1) | 21(1) | 1216.3 | 1198.4 | 0.0 |
| 39(1) | 22(1) | 1103.8 | 1095.0 | 0.0 |
| 39(1) | 23(1) | 1065.5 | 1050.6 | 0.1 |
| 39(1) | 24(1) | 1011.2 | 997.3  | 0.0 |
| 39(1) | 25(1) | 983.3  | 968.0  | 0.0 |
| 39(1) | 26(1) | 969.1  | 953.7  | 0.0 |
| 39(1) | 27(1) | 937.3  | 920.4  | 0.1 |
| 39(1) | 28(1) | 879.3  | 864.5  | 0.0 |
| 39(1) | 29(1) | 838.9  | 830.3  | 0.1 |
| 39(1) | 30(1) | 819.8  | 795.2  | 0.0 |
| 39(1) | 31(1) | 812.5  | 803.1  | 0.0 |
| 39(1) | 32(1) | 755.2  | 750.9  | 0.0 |
| 39(1) | 33(1) | 698.9  | 687.6  | 0.1 |
| 39(1) | 34(1) | 631.2  | 626.1  | 0.0 |
| 39(1) | 35(1) | 620.6  | 586.4  | 0.4 |
| 39(1) | 36(1) | 581.4  | 576.2  | 0.7 |
| 39(1) | 37(1) | 547.3  | 542.6  | 0.0 |
| 39(1) | 38(1) | 518.5  | 510.3  | 0.1 |
| 40(1) | 1(1)  | 4012.6 | 3823.8 | 0.0 |
| 40(1) | 2(1)  | 3947.2 | 3761.3 | 0.1 |
| 40(1) | 3(1)  | 3416.3 | 3286.9 | 0.0 |
| 40(1) | 4(1)  | 3408.7 | 3277.8 | 0.0 |
| 40(1) | 5(1)  | 3368.5 | 3237.0 | 0.0 |
| 40(1) | 6(1)  | 1977.4 | 1943.6 | 0.4 |
| 40(1) | 7(1)  | 1864.3 | 1816.7 | 0.1 |
| 40(1) | 8(1)  | 1826.1 | 1784.3 | 0.2 |
| 40(1) | 9(1)  | 1739.9 | 1697.7 | 1.1 |
| 40(1) | 10(1) | 1697.5 | 1658.8 | 3.3 |
| 40(1) | 11(1) | 1591.0 | 1550.2 | 1.0 |

|       |       |        |        |     |
|-------|-------|--------|--------|-----|
| 40(1) | 12(1) | 1568.3 | 1534.1 | 1.8 |
| 40(1) | 13(1) | 1532.9 | 1496.5 | 0.4 |
| 40(1) | 14(1) | 1475.6 | 1443.1 | 0.1 |
| 40(1) | 15(1) | 1428.0 | 1397.8 | 0.1 |
| 40(1) | 16(1) | 1412.1 | 1377.3 | 0.4 |
| 40(1) | 17(1) | 1374.6 | 1344.7 | 0.3 |
| 40(1) | 18(1) | 1339.7 | 1313.0 | 1.1 |
| 40(1) | 19(1) | 1309.3 | 1281.7 | 0.1 |
| 40(1) | 20(1) | 1199.0 | 1172.7 | 0.0 |
| 40(1) | 21(1) | 1193.3 | 1174.4 | 0.5 |
| 40(1) | 22(1) | 1080.8 | 1070.1 | 0.0 |
| 40(1) | 23(1) | 1042.4 | 1026.7 | 0.0 |
| 40(1) | 24(1) | 988.2  | 973.0  | 0.0 |
| 40(1) | 25(1) | 960.3  | 943.2  | 0.1 |
| 40(1) | 26(1) | 946.1  | 929.1  | 0.0 |
| 40(1) | 27(1) | 914.2  | 896.2  | 0.0 |
| 40(1) | 28(1) | 856.3  | 840.7  | 0.0 |
| 40(1) | 29(1) | 815.8  | 806.3  | 0.1 |
| 40(1) | 30(1) | 796.8  | 771.0  | 0.0 |
| 40(1) | 31(1) | 789.4  | 778.5  | 0.1 |
| 40(1) | 32(1) | 732.2  | 726.5  | 0.0 |
| 40(1) | 33(1) | 675.8  | 663.4  | 0.0 |
| 40(1) | 34(1) | 608.2  | 602.6  | 0.6 |
| 40(1) | 35(1) | 597.5  | 559.1  | 0.0 |
| 40(1) | 36(1) | 558.4  | 552.2  | 0.0 |
| 40(1) | 37(1) | 524.3  | 516.9  | 0.7 |
| 40(1) | 38(1) | 495.5  | 487.0  | 0.0 |
| 40(1) | 39(1) | 427.0  | 418.9  | 0.0 |
| 41(1) | 1(1)  | 3910.6 | 3725.1 | 0.0 |
| 41(1) | 2(1)  | 3845.2 | 3662.5 | 0.1 |
| 41(1) | 3(1)  | 3314.3 | 3187.6 | 0.0 |
| 41(1) | 4(1)  | 3306.7 | 3178.0 | 0.0 |
| 41(1) | 5(1)  | 3266.5 | 3137.7 | 0.0 |
| 41(1) | 6(1)  | 1875.4 | 1844.8 | 0.2 |
| 41(1) | 7(1)  | 1762.3 | 1717.5 | 0.0 |
| 41(1) | 8(1)  | 1724.1 | 1685.0 | 0.0 |
| 41(1) | 9(1)  | 1637.9 | 1598.8 | 0.1 |
| 41(1) | 10(1) | 1595.5 | 1559.4 | 0.0 |
| 41(1) | 11(1) | 1489.0 | 1451.6 | 0.0 |
| 41(1) | 12(1) | 1466.3 | 1435.1 | 0.0 |

|       |       |        |        |      |
|-------|-------|--------|--------|------|
| 41(1) | 13(1) | 1430.9 | 1397.4 | 0.1  |
| 41(1) | 14(1) | 1373.6 | 1344.3 | 0.0  |
| 41(1) | 15(1) | 1326.0 | 1298.2 | 0.0  |
| 41(1) | 16(1) | 1310.1 | 1278.3 | 0.0  |
| 41(1) | 17(1) | 1272.6 | 1245.3 | 0.1  |
| 41(1) | 18(1) | 1237.7 | 1213.9 | 0.0  |
| 41(1) | 19(1) | 1207.3 | 1183.1 | 0.1  |
| 41(1) | 20(1) | 1097.0 | 1072.6 | 0.1  |
| 41(1) | 21(1) | 1091.3 | 1074.9 | 0.0  |
| 41(1) | 22(1) | 978.8  | 970.7  | 0.0  |
| 41(1) | 23(1) | 940.5  | 927.3  | 0.2  |
| 41(1) | 24(1) | 886.2  | 873.7  | 0.1  |
| 41(1) | 25(1) | 858.3  | 844.5  | 0.0  |
| 41(1) | 26(1) | 844.1  | 830.1  | 0.0  |
| 41(1) | 27(1) | 812.2  | 795.9  | 0.0  |
| 41(1) | 28(1) | 754.3  | 741.2  | 0.1  |
| 41(1) | 29(1) | 713.9  | 708.3  | 17.5 |
| 41(1) | 30(1) | 694.8  | 671.6  | 0.1  |
| 41(1) | 31(1) | 687.4  | 679.4  | 0.0  |
| 41(1) | 32(1) | 630.2  | 626.2  | 0.0  |
| 41(1) | 33(1) | 573.8  | 564.0  | 0.8  |
| 41(1) | 34(1) | 506.2  | 504.2  | 0.0  |
| 41(1) | 35(1) | 495.6  | 461.6  | 0.3  |
| 41(1) | 36(1) | 456.4  | 453.1  | 0.0  |
| 41(1) | 37(1) | 422.3  | 419.7  | 0.0  |
| 41(1) | 38(1) | 393.5  | 386.1  | 0.6  |
| 41(1) | 39(1) | 325.0  | 320.0  | 0.0  |
| 41(1) | 40(1) | 302.0  | 295.0  | 0.0  |
| 42(1) | 1(1)  | 3856.4 | 3654.7 | 0.0  |
| 42(1) | 2(1)  | 3791.0 | 3593.3 | 0.0  |
| 42(1) | 3(1)  | 3260.1 | 3119.5 | 0.0  |
| 42(1) | 4(1)  | 3252.5 | 3109.5 | 0.0  |
| 42(1) | 5(1)  | 3212.3 | 3069.3 | 0.0  |
| 42(1) | 6(1)  | 1821.2 | 1777.9 | 1.6  |
| 42(1) | 7(1)  | 1708.1 | 1649.3 | 0.1  |
| 42(1) | 8(1)  | 1669.8 | 1617.1 | 0.0  |
| 42(1) | 9(1)  | 1583.7 | 1530.1 | 0.0  |
| 42(1) | 10(1) | 1541.3 | 1491.3 | 0.0  |
| 42(1) | 11(1) | 1434.8 | 1383.0 | 0.2  |
| 42(1) | 12(1) | 1412.1 | 1367.0 | 0.0  |

|       |       |        |        |     |
|-------|-------|--------|--------|-----|
| 42(1) | 13(1) | 1376.7 | 1328.6 | 0.0 |
| 42(1) | 14(1) | 1319.4 | 1275.8 | 0.0 |
| 42(1) | 15(1) | 1271.8 | 1229.9 | 0.0 |
| 42(1) | 16(1) | 1255.8 | 1209.6 | 0.4 |
| 42(1) | 17(1) | 1218.4 | 1177.1 | 0.1 |
| 42(1) | 18(1) | 1183.5 | 1145.1 | 0.3 |
| 42(1) | 19(1) | 1153.0 | 1114.0 | 0.5 |
| 42(1) | 20(1) | 1042.8 | 1002.4 | 0.0 |
| 42(1) | 21(1) | 1037.0 | 1007.3 | 0.0 |
| 42(1) | 22(1) | 924.5  | 903.4  | 0.0 |
| 42(1) | 23(1) | 886.2  | 859.0  | 0.1 |
| 42(1) | 24(1) | 831.9  | 805.3  | 0.1 |
| 42(1) | 25(1) | 804.0  | 776.0  | 0.0 |
| 42(1) | 26(1) | 789.8  | 761.3  | 0.0 |
| 42(1) | 27(1) | 758.0  | 728.2  | 0.1 |
| 42(1) | 28(1) | 700.0  | 673.0  | 0.1 |
| 42(1) | 29(1) | 659.6  | 638.1  | 0.9 |
| 42(1) | 30(1) | 640.6  | 600.2  | 1.0 |
| 42(1) | 31(1) | 633.2  | 610.2  | 0.5 |
| 42(1) | 32(1) | 576.0  | 558.2  | 0.0 |
| 42(1) | 33(1) | 519.6  | 494.3  | 0.0 |
| 42(1) | 34(1) | 452.0  | 434.1  | 0.0 |
| 42(1) | 35(1) | 441.3  | 381.9  | 0.0 |
| 42(1) | 36(1) | 402.2  | 387.0  | 0.0 |
| 42(1) | 37(1) | 368.1  | 350.7  | 0.0 |
| 42(1) | 38(1) | 339.2  | 315.8  | 0.1 |
| 42(1) | 39(1) | 270.8  | 249.1  | 0.0 |
| 42(1) | 40(1) | 247.8  | 226.0  | 0.0 |
| 42(1) | 41(1) | 145.8  | 128.4  | 0.0 |

**Table S12.** Harmonic and anharmonic vibrational frequencies and their intensities of conformer **A2** as computed at the B3LYP/cc-pVTZ level of theory.

| Mode (quanta) | $\nu_{\text{harm}}$<br>( $\text{cm}^{-1}$ ) | $\nu_{\text{anharm}}$<br>( $\text{cm}^{-1}$ ) | $I_{\text{harm}}$<br>( $\text{km mol}^{-1}$ ) | $I_{\text{anharm}}$<br>( $\text{km mol}^{-1}$ ) |
|---------------|---------------------------------------------|-----------------------------------------------|-----------------------------------------------|-------------------------------------------------|
| 1(1)          | 3810.8                                      | 3621.9                                        | 86.9                                          | 73.1                                            |
| 2(1)          | 3759.3                                      | 3577.0                                        | 96.6                                          | 79.1                                            |
| 3(1)          | 3220.3                                      | 3090.6                                        | 0.7                                           | 1.5                                             |
| 4(1)          | 3215.0                                      | 3074.9                                        | 0.1                                           | 0.0                                             |
| 5(1)          | 3166.3                                      | 3028.9                                        | 10.5                                          | 12.1                                            |
| 6(1)          | 1799.6                                      | 1769.2                                        | 413.0                                         | 195.9                                           |
| 7(1)          | 1662.9                                      | 1616.9                                        | 253.4                                         | 89.3                                            |
| 8(1)          | 1623.4                                      | 1587.0                                        | 132.1                                         | 98.0                                            |
| 9(1)          | 1538.9                                      | 1498.0                                        | 43.5                                          | 26.8                                            |
| 10(1)         | 1491.0                                      | 1455.3                                        | 45.3                                          | 17.7                                            |
| 11(1)         | 1376.6                                      | 1351.2                                        | 37.1                                          | 25.9                                            |
| 12(1)         | 1356.5                                      | 1317.2                                        | 10.3                                          | 4.5                                             |
| 13(1)         | 1334.2                                      | 1298.8                                        | 192.1                                         | 162.1                                           |
| 14(1)         | 1282.2                                      | 1254.2                                        | 0.7                                           | 0.4                                             |
| 15(1)         | 1228.4                                      | 1207.8                                        | 20.5                                          | 18.1                                            |
| 16(1)         | 1203.6                                      | 1173.0                                        | 191.7                                         | 97.4                                            |
| 17(1)         | 1179.0                                      | 1157.0                                        | 21.0                                          | 20.3                                            |
| 18(1)         | 1151.4                                      | 1125.1                                        | 331.5                                         | 327.1                                           |
| 19(1)         | 1074.4                                      | 1048.8                                        | 149.3                                         | 95.8                                            |
| 20(1)         | 992.6                                       | 976.3                                         | 36.7                                          | 36.6                                            |
| 21(1)         | 982.3                                       | 969.4                                         | 0.9                                           | 0.1                                             |
| 22(1)         | 881.6                                       | 875.1                                         | 34.1                                          | 32.6                                            |
| 23(1)         | 837.5                                       | 825.9                                         | 3.6                                           | 2.5                                             |
| 24(1)         | 783.8                                       | 775.5                                         | 45.5                                          | 21.6                                            |
| 25(1)         | 757.7                                       | 747.1                                         | 4.0                                           | 3.2                                             |
| 26(1)         | 743.2                                       | 731.3                                         | 5.9                                           | 3.8                                             |
| 27(1)         | 707.8                                       | 702.2                                         | 31.0                                          | 35.3                                            |
| 28(1)         | 650.9                                       | 642.1                                         | 0.6                                           | 3.2                                             |
| 29(1)         | 605.6                                       | 598.3                                         | 10.7                                          | 10.9                                            |
| 30(1)         | 591.2                                       | 585.8                                         | 69.0                                          | 61.5                                            |
| 31(1)         | 577.2                                       | 552.1                                         | 68.5                                          | 68.1                                            |
| 32(1)         | 526.1                                       | 522.2                                         | 5.6                                           | 4.6                                             |
| 33(1)         | 467.7                                       | 463.5                                         | 8.8                                           | 12.4                                            |
| 34(1)         | 409.7                                       | 408.0                                         | 5.0                                           | 4.4                                             |
| 35(1)         | 395.1                                       | 360.2                                         | 99.1                                          | 92.2                                            |
| 36(1)         | 366.7                                       | 362.7                                         | 1.7                                           | 1.9                                             |
| 37(1)         | 317.3                                       | 314.6                                         | 0.5                                           | 0.4                                             |

|       |        |        |       |       |
|-------|--------|--------|-------|-------|
| 38(1) | 291.7  | 289.0  | 0.9   | 1.0   |
| 39(1) | 225.4  | 223.4  | 1.7   | 2.4   |
| 40(1) | 197.9  | 195.2  | 0.3   | 0.3   |
| 41(1) | 99.0   | 99.5   | 0.0   | 0.0   |
| 42(1) | 40.3   | 47.1   | 0.3   | 0.3   |
| 1(2)  | 3810.8 | 3621.9 | 86.9  | 73.1  |
| 2(2)  | 3759.3 | 3577.0 | 96.6  | 79.1  |
| 3(2)  | 3220.3 | 3090.6 | 0.7   | 1.5   |
| 4(2)  | 3215.0 | 3074.9 | 0.1   | 0.0   |
| 5(2)  | 3166.3 | 3028.9 | 10.5  | 12.1  |
| 6(2)  | 1799.6 | 1769.2 | 413.0 | 195.9 |
| 7(2)  | 1662.9 | 1616.9 | 253.4 | 89.3  |
| 8(2)  | 1623.4 | 1587.0 | 132.1 | 98.0  |
| 9(2)  | 1538.9 | 1498.0 | 43.5  | 26.8  |
| 10(2) | 1491.0 | 1455.3 | 45.3  | 17.7  |
| 11(2) | 1376.6 | 1351.2 | 37.1  | 25.9  |
| 12(2) | 1356.5 | 1317.2 | 10.3  | 4.5   |
| 13(2) | 1334.2 | 1298.8 | 192.1 | 162.1 |
| 14(2) | 1282.2 | 1254.2 | 0.7   | 0.4   |
| 15(2) | 1228.4 | 1207.8 | 20.5  | 18.1  |
| 16(2) | 1203.6 | 1173.0 | 191.7 | 97.4  |
| 17(2) | 1179.0 | 1157.0 | 21.0  | 20.3  |
| 18(2) | 1151.4 | 1125.1 | 331.5 | 327.1 |
| 19(2) | 1074.4 | 1048.8 | 149.3 | 95.8  |
| 20(2) | 992.6  | 976.3  | 36.7  | 36.6  |
| 21(2) | 982.3  | 969.4  | 0.9   | 0.1   |
| 22(2) | 881.6  | 875.1  | 34.1  | 32.6  |
| 23(2) | 837.5  | 825.9  | 3.6   | 2.5   |
| 24(2) | 783.8  | 775.5  | 45.5  | 21.6  |
| 25(2) | 757.7  | 747.1  | 4.0   | 3.2   |
| 26(2) | 743.2  | 731.3  | 5.9   | 3.8   |
| 27(2) | 707.8  | 702.2  | 31.0  | 35.3  |
| 28(2) | 650.9  | 642.1  | 0.6   | 3.2   |
| 29(2) | 605.6  | 598.3  | 10.7  | 10.9  |
| 30(2) | 591.2  | 585.8  | 69.0  | 61.5  |
| 31(2) | 577.2  | 552.1  | 68.5  | 68.1  |
| 32(2) | 526.1  | 522.2  | 5.6   | 4.6   |
| 33(2) | 467.7  | 463.5  | 8.8   | 12.4  |
| 34(2) | 409.7  | 408.0  | 5.0   | 4.4   |
| 35(2) | 395.1  | 360.2  | 99.1  | 92.2  |



|       |      |        |        |       |       |
|-------|------|--------|--------|-------|-------|
| 36(2) |      | 366.7  | 362.7  | 1.7   | 1.9   |
| 37(2) |      | 317.3  | 314.6  | 0.5   | 0.4   |
| 38(2) |      | 291.7  | 289.0  | 0.9   | 1.0   |
| 39(2) |      | 225.4  | 223.4  | 1.7   | 2.4   |
| 40(2) |      | 197.9  | 195.2  | 0.3   | 0.3   |
| 41(2) |      | 99.0   | 99.5   | 0.0   | 0.0   |
| 42(2) |      | 40.3   | 47.1   | 0.3   | 0.3   |
| 2(1)  | 1(1) | 3810.8 | 3621.9 | 86.9  | 73.1  |
| 3(1)  | 1(1) | 3759.3 | 3577.0 | 96.6  | 79.1  |
| 3(1)  | 2(1) | 3220.3 | 3090.6 | 0.7   | 1.5   |
| 4(1)  | 1(1) | 3215.0 | 3074.9 | 0.1   | 0.0   |
| 4(1)  | 2(1) | 3166.3 | 3028.9 | 10.5  | 12.1  |
| 4(1)  | 3(1) | 1799.6 | 1769.2 | 413.0 | 195.9 |
| 5(1)  | 1(1) | 1662.9 | 1616.9 | 253.4 | 89.3  |
| 5(1)  | 2(1) | 1623.4 | 1587.0 | 132.1 | 98.0  |
| 5(1)  | 3(1) | 1538.9 | 1498.0 | 43.5  | 26.8  |
| 5(1)  | 4(1) | 1491.0 | 1455.3 | 45.3  | 17.7  |
| 6(1)  | 1(1) | 1376.6 | 1351.2 | 37.1  | 25.9  |
| 6(1)  | 2(1) | 1356.5 | 1317.2 | 10.3  | 4.5   |
| 6(1)  | 3(1) | 1334.2 | 1298.8 | 192.1 | 162.1 |
| 6(1)  | 4(1) | 1282.2 | 1254.2 | 0.7   | 0.4   |
| 6(1)  | 5(1) | 1228.4 | 1207.8 | 20.5  | 18.1  |
| 7(1)  | 1(1) | 1203.6 | 1173.0 | 191.7 | 97.4  |
| 7(1)  | 2(1) | 1179.0 | 1157.0 | 21.0  | 20.3  |
| 7(1)  | 3(1) | 1151.4 | 1125.1 | 331.5 | 327.1 |
| 7(1)  | 4(1) | 1074.4 | 1048.8 | 149.3 | 95.8  |
| 7(1)  | 5(1) | 992.6  | 976.3  | 36.7  | 36.6  |
| 7(1)  | 6(1) | 982.3  | 969.4  | 0.9   | 0.1   |
| 8(1)  | 1(1) | 881.6  | 875.1  | 34.1  | 32.6  |
| 8(1)  | 2(1) | 837.5  | 825.9  | 3.6   | 2.5   |
| 8(1)  | 3(1) | 783.8  | 775.5  | 45.5  | 21.6  |
| 8(1)  | 4(1) | 757.7  | 747.1  | 4.0   | 3.2   |
| 8(1)  | 5(1) | 743.2  | 731.3  | 5.9   | 3.8   |
| 8(1)  | 6(1) | 707.8  | 702.2  | 31.0  | 35.3  |
| 8(1)  | 7(1) | 650.9  | 642.1  | 0.6   | 3.2   |
| 9(1)  | 1(1) | 605.6  | 598.3  | 10.7  | 10.9  |
| 9(1)  | 2(1) | 591.2  | 585.8  | 69.0  | 61.5  |
| 9(1)  | 3(1) | 577.2  | 552.1  | 68.5  | 68.1  |
| 9(1)  | 4(1) | 526.1  | 522.2  | 5.6   | 4.6   |
| 9(1)  | 5(1) | 467.7  | 463.5  | 8.8   | 12.4  |

|       |       |        |        |       |       |
|-------|-------|--------|--------|-------|-------|
| 9(1)  | 6(1)  | 409.7  | 408.0  | 5.0   | 4.4   |
| 9(1)  | 7(1)  | 395.1  | 360.2  | 99.1  | 92.2  |
| 9(1)  | 8(1)  | 366.7  | 362.7  | 1.7   | 1.9   |
| 10(1) | 1(1)  | 317.3  | 314.6  | 0.5   | 0.4   |
| 10(1) | 2(1)  | 291.7  | 289.0  | 0.9   | 1.0   |
| 10(1) | 3(1)  | 225.4  | 223.4  | 1.7   | 2.4   |
| 10(1) | 4(1)  | 197.9  | 195.2  | 0.3   | 0.3   |
| 10(1) | 5(1)  | 99.0   | 99.5   | 0.0   | 0.0   |
| 10(1) | 6(1)  | 40.3   | 47.1   | 0.3   | 0.3   |
| 10(1) | 7(1)  | 3810.8 | 3621.9 | 86.9  | 73.1  |
| 10(1) | 8(1)  | 3759.3 | 3577.0 | 96.6  | 79.1  |
| 10(1) | 9(1)  | 3220.3 | 3090.6 | 0.7   | 1.5   |
| 11(1) | 1(1)  | 3215.0 | 3074.9 | 0.1   | 0.0   |
| 11(1) | 2(1)  | 3166.3 | 3028.9 | 10.5  | 12.1  |
| 11(1) | 3(1)  | 1799.6 | 1769.2 | 413.0 | 195.9 |
| 11(1) | 4(1)  | 1662.9 | 1616.9 | 253.4 | 89.3  |
| 11(1) | 5(1)  | 1623.4 | 1587.0 | 132.1 | 98.0  |
| 11(1) | 6(1)  | 1538.9 | 1498.0 | 43.5  | 26.8  |
| 11(1) | 7(1)  | 1491.0 | 1455.3 | 45.3  | 17.7  |
| 11(1) | 8(1)  | 1376.6 | 1351.2 | 37.1  | 25.9  |
| 11(1) | 9(1)  | 1356.5 | 1317.2 | 10.3  | 4.5   |
| 11(1) | 10(1) | 1334.2 | 1298.8 | 192.1 | 162.1 |
| 12(1) | 1(1)  | 1282.2 | 1254.2 | 0.7   | 0.4   |
| 12(1) | 2(1)  | 1228.4 | 1207.8 | 20.5  | 18.1  |
| 12(1) | 3(1)  | 1203.6 | 1173.0 | 191.7 | 97.4  |
| 12(1) | 4(1)  | 1179.0 | 1157.0 | 21.0  | 20.3  |
| 12(1) | 5(1)  | 1151.4 | 1125.1 | 331.5 | 327.1 |
| 12(1) | 6(1)  | 1074.4 | 1048.8 | 149.3 | 95.8  |
| 12(1) | 7(1)  | 992.6  | 976.3  | 36.7  | 36.6  |
| 12(1) | 8(1)  | 982.3  | 969.4  | 0.9   | 0.1   |
| 12(1) | 9(1)  | 881.6  | 875.1  | 34.1  | 32.6  |
| 12(1) | 10(1) | 837.5  | 825.9  | 3.6   | 2.5   |
| 12(1) | 11(1) | 783.8  | 775.5  | 45.5  | 21.6  |
| 13(1) | 1(1)  | 757.7  | 747.1  | 4.0   | 3.2   |
| 13(1) | 2(1)  | 743.2  | 731.3  | 5.9   | 3.8   |
| 13(1) | 3(1)  | 707.8  | 702.2  | 31.0  | 35.3  |
| 13(1) | 4(1)  | 650.9  | 642.1  | 0.6   | 3.2   |
| 13(1) | 5(1)  | 605.6  | 598.3  | 10.7  | 10.9  |
| 13(1) | 6(1)  | 591.2  | 585.8  | 69.0  | 61.5  |
| 13(1) | 7(1)  | 577.2  | 552.1  | 68.5  | 68.1  |

|       |       |        |        |       |       |
|-------|-------|--------|--------|-------|-------|
| 13(1) | 8(1)  | 526.1  | 522.2  | 5.6   | 4.6   |
| 13(1) | 9(1)  | 467.7  | 463.5  | 8.8   | 12.4  |
| 13(1) | 10(1) | 409.7  | 408.0  | 5.0   | 4.4   |
| 13(1) | 11(1) | 395.1  | 360.2  | 99.1  | 92.2  |
| 13(1) | 12(1) | 366.7  | 362.7  | 1.7   | 1.9   |
| 14(1) | 1(1)  | 317.3  | 314.6  | 0.5   | 0.4   |
| 14(1) | 2(1)  | 291.7  | 289.0  | 0.9   | 1.0   |
| 14(1) | 3(1)  | 225.4  | 223.4  | 1.7   | 2.4   |
| 14(1) | 4(1)  | 197.9  | 195.2  | 0.3   | 0.3   |
| 14(1) | 5(1)  | 99.0   | 99.5   | 0.0   | 0.0   |
| 14(1) | 6(1)  | 40.3   | 47.1   | 0.3   | 0.3   |
| 14(1) | 7(1)  | 3810.8 | 3621.9 | 86.9  | 73.1  |
| 14(1) | 8(1)  | 3759.3 | 3577.0 | 96.6  | 79.1  |
| 14(1) | 9(1)  | 3220.3 | 3090.6 | 0.7   | 1.5   |
| 14(1) | 10(1) | 3215.0 | 3074.9 | 0.1   | 0.0   |
| 14(1) | 11(1) | 3166.3 | 3028.9 | 10.5  | 12.1  |
| 14(1) | 12(1) | 1799.6 | 1769.2 | 413.0 | 195.9 |
| 14(1) | 13(1) | 1662.9 | 1616.9 | 253.4 | 89.3  |
| 15(1) | 1(1)  | 1623.4 | 1587.0 | 132.1 | 98.0  |
| 15(1) | 2(1)  | 1538.9 | 1498.0 | 43.5  | 26.8  |
| 15(1) | 3(1)  | 1491.0 | 1455.3 | 45.3  | 17.7  |
| 15(1) | 4(1)  | 1376.6 | 1351.2 | 37.1  | 25.9  |
| 15(1) | 5(1)  | 1356.5 | 1317.2 | 10.3  | 4.5   |
| 15(1) | 6(1)  | 1334.2 | 1298.8 | 192.1 | 162.1 |
| 15(1) | 7(1)  | 1282.2 | 1254.2 | 0.7   | 0.4   |
| 15(1) | 8(1)  | 1228.4 | 1207.8 | 20.5  | 18.1  |
| 15(1) | 9(1)  | 1203.6 | 1173.0 | 191.7 | 97.4  |
| 15(1) | 10(1) | 1179.0 | 1157.0 | 21.0  | 20.3  |
| 15(1) | 11(1) | 1151.4 | 1125.1 | 331.5 | 327.1 |
| 15(1) | 12(1) | 1074.4 | 1048.8 | 149.3 | 95.8  |
| 15(1) | 13(1) | 992.6  | 976.3  | 36.7  | 36.6  |
| 15(1) | 14(1) | 982.3  | 969.4  | 0.9   | 0.1   |
| 16(1) | 1(1)  | 881.6  | 875.1  | 34.1  | 32.6  |
| 16(1) | 2(1)  | 837.5  | 825.9  | 3.6   | 2.5   |
| 16(1) | 3(1)  | 783.8  | 775.5  | 45.5  | 21.6  |
| 16(1) | 4(1)  | 757.7  | 747.1  | 4.0   | 3.2   |
| 16(1) | 5(1)  | 743.2  | 731.3  | 5.9   | 3.8   |
| 16(1) | 6(1)  | 707.8  | 702.2  | 31.0  | 35.3  |
| 16(1) | 7(1)  | 650.9  | 642.1  | 0.6   | 3.2   |
| 16(1) | 8(1)  | 605.6  | 598.3  | 10.7  | 10.9  |

|       |       |        |        |       |       |
|-------|-------|--------|--------|-------|-------|
| 16(1) | 9(1)  | 591.2  | 585.8  | 69.0  | 61.5  |
| 16(1) | 10(1) | 577.2  | 552.1  | 68.5  | 68.1  |
| 16(1) | 11(1) | 526.1  | 522.2  | 5.6   | 4.6   |
| 16(1) | 12(1) | 467.7  | 463.5  | 8.8   | 12.4  |
| 16(1) | 13(1) | 409.7  | 408.0  | 5.0   | 4.4   |
| 16(1) | 14(1) | 395.1  | 360.2  | 99.1  | 92.2  |
| 16(1) | 15(1) | 366.7  | 362.7  | 1.7   | 1.9   |
| 17(1) | 1(1)  | 317.3  | 314.6  | 0.5   | 0.4   |
| 17(1) | 2(1)  | 291.7  | 289.0  | 0.9   | 1.0   |
| 17(1) | 3(1)  | 225.4  | 223.4  | 1.7   | 2.4   |
| 17(1) | 4(1)  | 197.9  | 195.2  | 0.3   | 0.3   |
| 17(1) | 5(1)  | 99.0   | 99.5   | 0.0   | 0.0   |
| 17(1) | 6(1)  | 40.3   | 47.1   | 0.3   | 0.3   |
| 17(1) | 7(1)  | 3810.8 | 3621.9 | 86.9  | 73.1  |
| 17(1) | 8(1)  | 3759.3 | 3577.0 | 96.6  | 79.1  |
| 17(1) | 9(1)  | 3220.3 | 3090.6 | 0.7   | 1.5   |
| 17(1) | 10(1) | 3215.0 | 3074.9 | 0.1   | 0.0   |
| 17(1) | 11(1) | 3166.3 | 3028.9 | 10.5  | 12.1  |
| 17(1) | 12(1) | 1799.6 | 1769.2 | 413.0 | 195.9 |
| 17(1) | 13(1) | 1662.9 | 1616.9 | 253.4 | 89.3  |
| 17(1) | 14(1) | 1623.4 | 1587.0 | 132.1 | 98.0  |
| 17(1) | 15(1) | 1538.9 | 1498.0 | 43.5  | 26.8  |
| 17(1) | 16(1) | 1491.0 | 1455.3 | 45.3  | 17.7  |
| 18(1) | 1(1)  | 1376.6 | 1351.2 | 37.1  | 25.9  |
| 18(1) | 2(1)  | 1356.5 | 1317.2 | 10.3  | 4.5   |
| 18(1) | 3(1)  | 1334.2 | 1298.8 | 192.1 | 162.1 |
| 18(1) | 4(1)  | 1282.2 | 1254.2 | 0.7   | 0.4   |
| 18(1) | 5(1)  | 1228.4 | 1207.8 | 20.5  | 18.1  |
| 18(1) | 6(1)  | 1203.6 | 1173.0 | 191.7 | 97.4  |
| 18(1) | 7(1)  | 1179.0 | 1157.0 | 21.0  | 20.3  |
| 18(1) | 8(1)  | 1151.4 | 1125.1 | 331.5 | 327.1 |
| 18(1) | 9(1)  | 1074.4 | 1048.8 | 149.3 | 95.8  |
| 18(1) | 10(1) | 992.6  | 976.3  | 36.7  | 36.6  |
| 18(1) | 11(1) | 982.3  | 969.4  | 0.9   | 0.1   |
| 18(1) | 12(1) | 881.6  | 875.1  | 34.1  | 32.6  |
| 18(1) | 13(1) | 837.5  | 825.9  | 3.6   | 2.5   |
| 18(1) | 14(1) | 783.8  | 775.5  | 45.5  | 21.6  |
| 18(1) | 15(1) | 757.7  | 747.1  | 4.0   | 3.2   |
| 18(1) | 16(1) | 743.2  | 731.3  | 5.9   | 3.8   |
| 18(1) | 17(1) | 707.8  | 702.2  | 31.0  | 35.3  |

|       |       |        |        |       |       |
|-------|-------|--------|--------|-------|-------|
| 19(1) | 1(1)  | 650.9  | 642.1  | 0.6   | 3.2   |
| 19(1) | 2(1)  | 605.6  | 598.3  | 10.7  | 10.9  |
| 19(1) | 3(1)  | 591.2  | 585.8  | 69.0  | 61.5  |
| 19(1) | 4(1)  | 577.2  | 552.1  | 68.5  | 68.1  |
| 19(1) | 5(1)  | 526.1  | 522.2  | 5.6   | 4.6   |
| 19(1) | 6(1)  | 467.7  | 463.5  | 8.8   | 12.4  |
| 19(1) | 7(1)  | 409.7  | 408.0  | 5.0   | 4.4   |
| 19(1) | 8(1)  | 395.1  | 360.2  | 99.1  | 92.2  |
| 19(1) | 9(1)  | 366.7  | 362.7  | 1.7   | 1.9   |
| 19(1) | 10(1) | 317.3  | 314.6  | 0.5   | 0.4   |
| 19(1) | 11(1) | 291.7  | 289.0  | 0.9   | 1.0   |
| 19(1) | 12(1) | 225.4  | 223.4  | 1.7   | 2.4   |
| 19(1) | 13(1) | 197.9  | 195.2  | 0.3   | 0.3   |
| 19(1) | 14(1) | 99.0   | 99.5   | 0.0   | 0.0   |
| 19(1) | 15(1) | 40.3   | 47.1   | 0.3   | 0.3   |
| 19(1) | 16(1) | 3810.8 | 3621.9 | 86.9  | 73.1  |
| 19(1) | 17(1) | 3759.3 | 3577.0 | 96.6  | 79.1  |
| 19(1) | 18(1) | 3220.3 | 3090.6 | 0.7   | 1.5   |
| 20(1) | 1(1)  | 3215.0 | 3074.9 | 0.1   | 0.0   |
| 20(1) | 2(1)  | 3166.3 | 3028.9 | 10.5  | 12.1  |
| 20(1) | 3(1)  | 1799.6 | 1769.2 | 413.0 | 195.9 |
| 20(1) | 4(1)  | 1662.9 | 1616.9 | 253.4 | 89.3  |
| 20(1) | 5(1)  | 1623.4 | 1587.0 | 132.1 | 98.0  |
| 20(1) | 6(1)  | 1538.9 | 1498.0 | 43.5  | 26.8  |
| 20(1) | 7(1)  | 1491.0 | 1455.3 | 45.3  | 17.7  |
| 20(1) | 8(1)  | 1376.6 | 1351.2 | 37.1  | 25.9  |
| 20(1) | 9(1)  | 1356.5 | 1317.2 | 10.3  | 4.5   |
| 20(1) | 10(1) | 1334.2 | 1298.8 | 192.1 | 162.1 |
| 20(1) | 11(1) | 1282.2 | 1254.2 | 0.7   | 0.4   |
| 20(1) | 12(1) | 1228.4 | 1207.8 | 20.5  | 18.1  |
| 20(1) | 13(1) | 1203.6 | 1173.0 | 191.7 | 97.4  |
| 20(1) | 14(1) | 1179.0 | 1157.0 | 21.0  | 20.3  |
| 20(1) | 15(1) | 1151.4 | 1125.1 | 331.5 | 327.1 |
| 20(1) | 16(1) | 1074.4 | 1048.8 | 149.3 | 95.8  |
| 20(1) | 17(1) | 992.6  | 976.3  | 36.7  | 36.6  |
| 20(1) | 18(1) | 982.3  | 969.4  | 0.9   | 0.1   |
| 20(1) | 19(1) | 881.6  | 875.1  | 34.1  | 32.6  |
| 21(1) | 1(1)  | 837.5  | 825.9  | 3.6   | 2.5   |
| 21(1) | 2(1)  | 783.8  | 775.5  | 45.5  | 21.6  |
| 21(1) | 3(1)  | 757.7  | 747.1  | 4.0   | 3.2   |

|       |       |        |        |       |       |
|-------|-------|--------|--------|-------|-------|
| 21(1) | 4(1)  | 743.2  | 731.3  | 5.9   | 3.8   |
| 21(1) | 5(1)  | 707.8  | 702.2  | 31.0  | 35.3  |
| 21(1) | 6(1)  | 650.9  | 642.1  | 0.6   | 3.2   |
| 21(1) | 7(1)  | 605.6  | 598.3  | 10.7  | 10.9  |
| 21(1) | 8(1)  | 591.2  | 585.8  | 69.0  | 61.5  |
| 21(1) | 9(1)  | 577.2  | 552.1  | 68.5  | 68.1  |
| 21(1) | 10(1) | 526.1  | 522.2  | 5.6   | 4.6   |
| 21(1) | 11(1) | 467.7  | 463.5  | 8.8   | 12.4  |
| 21(1) | 12(1) | 409.7  | 408.0  | 5.0   | 4.4   |
| 21(1) | 13(1) | 395.1  | 360.2  | 99.1  | 92.2  |
| 21(1) | 14(1) | 366.7  | 362.7  | 1.7   | 1.9   |
| 21(1) | 15(1) | 317.3  | 314.6  | 0.5   | 0.4   |
| 21(1) | 16(1) | 291.7  | 289.0  | 0.9   | 1.0   |
| 21(1) | 17(1) | 225.4  | 223.4  | 1.7   | 2.4   |
| 21(1) | 18(1) | 197.9  | 195.2  | 0.3   | 0.3   |
| 21(1) | 19(1) | 99.0   | 99.5   | 0.0   | 0.0   |
| 21(1) | 20(1) | 40.3   | 47.1   | 0.3   | 0.3   |
| 22(1) | 1(1)  | 3810.8 | 3621.9 | 86.9  | 73.1  |
| 22(1) | 2(1)  | 3759.3 | 3577.0 | 96.6  | 79.1  |
| 22(1) | 3(1)  | 3220.3 | 3090.6 | 0.7   | 1.5   |
| 22(1) | 4(1)  | 3215.0 | 3074.9 | 0.1   | 0.0   |
| 22(1) | 5(1)  | 3166.3 | 3028.9 | 10.5  | 12.1  |
| 22(1) | 6(1)  | 1799.6 | 1769.2 | 413.0 | 195.9 |
| 22(1) | 7(1)  | 1662.9 | 1616.9 | 253.4 | 89.3  |
| 22(1) | 8(1)  | 1623.4 | 1587.0 | 132.1 | 98.0  |
| 22(1) | 9(1)  | 1538.9 | 1498.0 | 43.5  | 26.8  |
| 22(1) | 10(1) | 1491.0 | 1455.3 | 45.3  | 17.7  |
| 22(1) | 11(1) | 1376.6 | 1351.2 | 37.1  | 25.9  |
| 22(1) | 12(1) | 1356.5 | 1317.2 | 10.3  | 4.5   |
| 22(1) | 13(1) | 1334.2 | 1298.8 | 192.1 | 162.1 |
| 22(1) | 14(1) | 1282.2 | 1254.2 | 0.7   | 0.4   |
| 22(1) | 15(1) | 1228.4 | 1207.8 | 20.5  | 18.1  |
| 22(1) | 16(1) | 1203.6 | 1173.0 | 191.7 | 97.4  |
| 22(1) | 17(1) | 1179.0 | 1157.0 | 21.0  | 20.3  |
| 22(1) | 18(1) | 1151.4 | 1125.1 | 331.5 | 327.1 |
| 22(1) | 19(1) | 1074.4 | 1048.8 | 149.3 | 95.8  |
| 22(1) | 20(1) | 992.6  | 976.3  | 36.7  | 36.6  |
| 22(1) | 21(1) | 982.3  | 969.4  | 0.9   | 0.1   |
| 23(1) | 1(1)  | 881.6  | 875.1  | 34.1  | 32.6  |
| 23(1) | 2(1)  | 837.5  | 825.9  | 3.6   | 2.5   |

|       |       |        |        |       |       |
|-------|-------|--------|--------|-------|-------|
| 23(1) | 3(1)  | 783.8  | 775.5  | 45.5  | 21.6  |
| 23(1) | 4(1)  | 757.7  | 747.1  | 4.0   | 3.2   |
| 23(1) | 5(1)  | 743.2  | 731.3  | 5.9   | 3.8   |
| 23(1) | 6(1)  | 707.8  | 702.2  | 31.0  | 35.3  |
| 23(1) | 7(1)  | 650.9  | 642.1  | 0.6   | 3.2   |
| 23(1) | 8(1)  | 605.6  | 598.3  | 10.7  | 10.9  |
| 23(1) | 9(1)  | 591.2  | 585.8  | 69.0  | 61.5  |
| 23(1) | 10(1) | 577.2  | 552.1  | 68.5  | 68.1  |
| 23(1) | 11(1) | 526.1  | 522.2  | 5.6   | 4.6   |
| 23(1) | 12(1) | 467.7  | 463.5  | 8.8   | 12.4  |
| 23(1) | 13(1) | 409.7  | 408.0  | 5.0   | 4.4   |
| 23(1) | 14(1) | 395.1  | 360.2  | 99.1  | 92.2  |
| 23(1) | 15(1) | 366.7  | 362.7  | 1.7   | 1.9   |
| 23(1) | 16(1) | 317.3  | 314.6  | 0.5   | 0.4   |
| 23(1) | 17(1) | 291.7  | 289.0  | 0.9   | 1.0   |
| 23(1) | 18(1) | 225.4  | 223.4  | 1.7   | 2.4   |
| 23(1) | 19(1) | 197.9  | 195.2  | 0.3   | 0.3   |
| 23(1) | 20(1) | 99.0   | 99.5   | 0.0   | 0.0   |
| 23(1) | 21(1) | 40.3   | 47.1   | 0.3   | 0.3   |
| 23(1) | 22(1) | 3810.8 | 3621.9 | 86.9  | 73.1  |
| 24(1) | 1(1)  | 3759.3 | 3577.0 | 96.6  | 79.1  |
| 24(1) | 2(1)  | 3220.3 | 3090.6 | 0.7   | 1.5   |
| 24(1) | 3(1)  | 3215.0 | 3074.9 | 0.1   | 0.0   |
| 24(1) | 4(1)  | 3166.3 | 3028.9 | 10.5  | 12.1  |
| 24(1) | 5(1)  | 1799.6 | 1769.2 | 413.0 | 195.9 |
| 24(1) | 6(1)  | 1662.9 | 1616.9 | 253.4 | 89.3  |
| 24(1) | 7(1)  | 1623.4 | 1587.0 | 132.1 | 98.0  |
| 24(1) | 8(1)  | 1538.9 | 1498.0 | 43.5  | 26.8  |
| 24(1) | 9(1)  | 1491.0 | 1455.3 | 45.3  | 17.7  |
| 24(1) | 10(1) | 1376.6 | 1351.2 | 37.1  | 25.9  |
| 24(1) | 11(1) | 1356.5 | 1317.2 | 10.3  | 4.5   |
| 24(1) | 12(1) | 1334.2 | 1298.8 | 192.1 | 162.1 |
| 24(1) | 13(1) | 1282.2 | 1254.2 | 0.7   | 0.4   |
| 24(1) | 14(1) | 1228.4 | 1207.8 | 20.5  | 18.1  |
| 24(1) | 15(1) | 1203.6 | 1173.0 | 191.7 | 97.4  |
| 24(1) | 16(1) | 1179.0 | 1157.0 | 21.0  | 20.3  |
| 24(1) | 17(1) | 1151.4 | 1125.1 | 331.5 | 327.1 |
| 24(1) | 18(1) | 1074.4 | 1048.8 | 149.3 | 95.8  |
| 24(1) | 19(1) | 992.6  | 976.3  | 36.7  | 36.6  |
| 24(1) | 20(1) | 982.3  | 969.4  | 0.9   | 0.1   |

|       |       |        |        |       |       |
|-------|-------|--------|--------|-------|-------|
| 24(1) | 21(1) | 881.6  | 875.1  | 34.1  | 32.6  |
| 24(1) | 22(1) | 837.5  | 825.9  | 3.6   | 2.5   |
| 24(1) | 23(1) | 783.8  | 775.5  | 45.5  | 21.6  |
| 25(1) | 1(1)  | 757.7  | 747.1  | 4.0   | 3.2   |
| 25(1) | 2(1)  | 743.2  | 731.3  | 5.9   | 3.8   |
| 25(1) | 3(1)  | 707.8  | 702.2  | 31.0  | 35.3  |
| 25(1) | 4(1)  | 650.9  | 642.1  | 0.6   | 3.2   |
| 25(1) | 5(1)  | 605.6  | 598.3  | 10.7  | 10.9  |
| 25(1) | 6(1)  | 591.2  | 585.8  | 69.0  | 61.5  |
| 25(1) | 7(1)  | 577.2  | 552.1  | 68.5  | 68.1  |
| 25(1) | 8(1)  | 526.1  | 522.2  | 5.6   | 4.6   |
| 25(1) | 9(1)  | 467.7  | 463.5  | 8.8   | 12.4  |
| 25(1) | 10(1) | 409.7  | 408.0  | 5.0   | 4.4   |
| 25(1) | 11(1) | 395.1  | 360.2  | 99.1  | 92.2  |
| 25(1) | 12(1) | 366.7  | 362.7  | 1.7   | 1.9   |
| 25(1) | 13(1) | 317.3  | 314.6  | 0.5   | 0.4   |
| 25(1) | 14(1) | 291.7  | 289.0  | 0.9   | 1.0   |
| 25(1) | 15(1) | 225.4  | 223.4  | 1.7   | 2.4   |
| 25(1) | 16(1) | 197.9  | 195.2  | 0.3   | 0.3   |
| 25(1) | 17(1) | 99.0   | 99.5   | 0.0   | 0.0   |
| 25(1) | 18(1) | 40.3   | 47.1   | 0.3   | 0.3   |
| 25(1) | 19(1) | 3810.8 | 3621.9 | 86.9  | 73.1  |
| 25(1) | 20(1) | 3759.3 | 3577.0 | 96.6  | 79.1  |
| 25(1) | 21(1) | 3220.3 | 3090.6 | 0.7   | 1.5   |
| 25(1) | 22(1) | 3215.0 | 3074.9 | 0.1   | 0.0   |
| 25(1) | 23(1) | 3166.3 | 3028.9 | 10.5  | 12.1  |
| 25(1) | 24(1) | 1799.6 | 1769.2 | 413.0 | 195.9 |
| 26(1) | 1(1)  | 1662.9 | 1616.9 | 253.4 | 89.3  |
| 26(1) | 2(1)  | 1623.4 | 1587.0 | 132.1 | 98.0  |
| 26(1) | 3(1)  | 1538.9 | 1498.0 | 43.5  | 26.8  |
| 26(1) | 4(1)  | 1491.0 | 1455.3 | 45.3  | 17.7  |
| 26(1) | 5(1)  | 1376.6 | 1351.2 | 37.1  | 25.9  |
| 26(1) | 6(1)  | 1356.5 | 1317.2 | 10.3  | 4.5   |
| 26(1) | 7(1)  | 1334.2 | 1298.8 | 192.1 | 162.1 |
| 26(1) | 8(1)  | 1282.2 | 1254.2 | 0.7   | 0.4   |
| 26(1) | 9(1)  | 1228.4 | 1207.8 | 20.5  | 18.1  |
| 26(1) | 10(1) | 1203.6 | 1173.0 | 191.7 | 97.4  |
| 26(1) | 11(1) | 1179.0 | 1157.0 | 21.0  | 20.3  |
| 26(1) | 12(1) | 1151.4 | 1125.1 | 331.5 | 327.1 |
| 26(1) | 13(1) | 1074.4 | 1048.8 | 149.3 | 95.8  |



|       |       |        |        |       |       |
|-------|-------|--------|--------|-------|-------|
| 26(1) | 14(1) | 992.6  | 976.3  | 36.7  | 36.6  |
| 26(1) | 15(1) | 982.3  | 969.4  | 0.9   | 0.1   |
| 26(1) | 16(1) | 881.6  | 875.1  | 34.1  | 32.6  |
| 26(1) | 17(1) | 837.5  | 825.9  | 3.6   | 2.5   |
| 26(1) | 18(1) | 783.8  | 775.5  | 45.5  | 21.6  |
| 26(1) | 19(1) | 757.7  | 747.1  | 4.0   | 3.2   |
| 26(1) | 20(1) | 743.2  | 731.3  | 5.9   | 3.8   |
| 26(1) | 21(1) | 707.8  | 702.2  | 31.0  | 35.3  |
| 26(1) | 22(1) | 650.9  | 642.1  | 0.6   | 3.2   |
| 26(1) | 23(1) | 605.6  | 598.3  | 10.7  | 10.9  |
| 26(1) | 24(1) | 591.2  | 585.8  | 69.0  | 61.5  |
| 26(1) | 25(1) | 577.2  | 552.1  | 68.5  | 68.1  |
| 27(1) | 1(1)  | 526.1  | 522.2  | 5.6   | 4.6   |
| 27(1) | 2(1)  | 467.7  | 463.5  | 8.8   | 12.4  |
| 27(1) | 3(1)  | 409.7  | 408.0  | 5.0   | 4.4   |
| 27(1) | 4(1)  | 395.1  | 360.2  | 99.1  | 92.2  |
| 27(1) | 5(1)  | 366.7  | 362.7  | 1.7   | 1.9   |
| 27(1) | 6(1)  | 317.3  | 314.6  | 0.5   | 0.4   |
| 27(1) | 7(1)  | 291.7  | 289.0  | 0.9   | 1.0   |
| 27(1) | 8(1)  | 225.4  | 223.4  | 1.7   | 2.4   |
| 27(1) | 9(1)  | 197.9  | 195.2  | 0.3   | 0.3   |
| 27(1) | 10(1) | 99.0   | 99.5   | 0.0   | 0.0   |
| 27(1) | 11(1) | 40.3   | 47.1   | 0.3   | 0.3   |
| 27(1) | 12(1) | 3810.8 | 3621.9 | 86.9  | 73.1  |
| 27(1) | 13(1) | 3759.3 | 3577.0 | 96.6  | 79.1  |
| 27(1) | 14(1) | 3220.3 | 3090.6 | 0.7   | 1.5   |
| 27(1) | 15(1) | 3215.0 | 3074.9 | 0.1   | 0.0   |
| 27(1) | 16(1) | 3166.3 | 3028.9 | 10.5  | 12.1  |
| 27(1) | 17(1) | 1799.6 | 1769.2 | 413.0 | 195.9 |
| 27(1) | 18(1) | 1662.9 | 1616.9 | 253.4 | 89.3  |
| 27(1) | 19(1) | 1623.4 | 1587.0 | 132.1 | 98.0  |
| 27(1) | 20(1) | 1538.9 | 1498.0 | 43.5  | 26.8  |
| 27(1) | 21(1) | 1491.0 | 1455.3 | 45.3  | 17.7  |
| 27(1) | 22(1) | 1376.6 | 1351.2 | 37.1  | 25.9  |
| 27(1) | 23(1) | 1356.5 | 1317.2 | 10.3  | 4.5   |
| 27(1) | 24(1) | 1334.2 | 1298.8 | 192.1 | 162.1 |
| 27(1) | 25(1) | 1282.2 | 1254.2 | 0.7   | 0.4   |
| 27(1) | 26(1) | 1228.4 | 1207.8 | 20.5  | 18.1  |
| 28(1) | 1(1)  | 1203.6 | 1173.0 | 191.7 | 97.4  |
| 28(1) | 2(1)  | 1179.0 | 1157.0 | 21.0  | 20.3  |

|       |       |        |        |       |       |
|-------|-------|--------|--------|-------|-------|
| 28(1) | 3(1)  | 1151.4 | 1125.1 | 331.5 | 327.1 |
| 28(1) | 4(1)  | 1074.4 | 1048.8 | 149.3 | 95.8  |
| 28(1) | 5(1)  | 992.6  | 976.3  | 36.7  | 36.6  |
| 28(1) | 6(1)  | 982.3  | 969.4  | 0.9   | 0.1   |
| 28(1) | 7(1)  | 881.6  | 875.1  | 34.1  | 32.6  |
| 28(1) | 8(1)  | 837.5  | 825.9  | 3.6   | 2.5   |
| 28(1) | 9(1)  | 783.8  | 775.5  | 45.5  | 21.6  |
| 28(1) | 10(1) | 757.7  | 747.1  | 4.0   | 3.2   |
| 28(1) | 11(1) | 743.2  | 731.3  | 5.9   | 3.8   |
| 28(1) | 12(1) | 707.8  | 702.2  | 31.0  | 35.3  |
| 28(1) | 13(1) | 650.9  | 642.1  | 0.6   | 3.2   |
| 28(1) | 14(1) | 605.6  | 598.3  | 10.7  | 10.9  |
| 28(1) | 15(1) | 591.2  | 585.8  | 69.0  | 61.5  |
| 28(1) | 16(1) | 577.2  | 552.1  | 68.5  | 68.1  |
| 28(1) | 17(1) | 526.1  | 522.2  | 5.6   | 4.6   |
| 28(1) | 18(1) | 467.7  | 463.5  | 8.8   | 12.4  |
| 28(1) | 19(1) | 409.7  | 408.0  | 5.0   | 4.4   |
| 28(1) | 20(1) | 395.1  | 360.2  | 99.1  | 92.2  |
| 28(1) | 21(1) | 366.7  | 362.7  | 1.7   | 1.9   |
| 28(1) | 22(1) | 317.3  | 314.6  | 0.5   | 0.4   |
| 28(1) | 23(1) | 291.7  | 289.0  | 0.9   | 1.0   |
| 28(1) | 24(1) | 225.4  | 223.4  | 1.7   | 2.4   |
| 28(1) | 25(1) | 197.9  | 195.2  | 0.3   | 0.3   |
| 28(1) | 26(1) | 99.0   | 99.5   | 0.0   | 0.0   |
| 28(1) | 27(1) | 40.3   | 47.1   | 0.3   | 0.3   |
| 29(1) | 1(1)  | 3810.8 | 3621.9 | 86.9  | 73.1  |
| 29(1) | 2(1)  | 3759.3 | 3577.0 | 96.6  | 79.1  |
| 29(1) | 3(1)  | 3220.3 | 3090.6 | 0.7   | 1.5   |
| 29(1) | 4(1)  | 3215.0 | 3074.9 | 0.1   | 0.0   |
| 29(1) | 5(1)  | 3166.3 | 3028.9 | 10.5  | 12.1  |
| 29(1) | 6(1)  | 1799.6 | 1769.2 | 413.0 | 195.9 |
| 29(1) | 7(1)  | 1662.9 | 1616.9 | 253.4 | 89.3  |
| 29(1) | 8(1)  | 1623.4 | 1587.0 | 132.1 | 98.0  |
| 29(1) | 9(1)  | 1538.9 | 1498.0 | 43.5  | 26.8  |
| 29(1) | 10(1) | 1491.0 | 1455.3 | 45.3  | 17.7  |
| 29(1) | 11(1) | 1376.6 | 1351.2 | 37.1  | 25.9  |
| 29(1) | 12(1) | 1356.5 | 1317.2 | 10.3  | 4.5   |
| 29(1) | 13(1) | 1334.2 | 1298.8 | 192.1 | 162.1 |
| 29(1) | 14(1) | 1282.2 | 1254.2 | 0.7   | 0.4   |
| 29(1) | 15(1) | 1228.4 | 1207.8 | 20.5  | 18.1  |

|       |       |        |        |       |       |
|-------|-------|--------|--------|-------|-------|
| 29(1) | 16(1) | 1203.6 | 1173.0 | 191.7 | 97.4  |
| 29(1) | 17(1) | 1179.0 | 1157.0 | 21.0  | 20.3  |
| 29(1) | 18(1) | 1151.4 | 1125.1 | 331.5 | 327.1 |
| 29(1) | 19(1) | 1074.4 | 1048.8 | 149.3 | 95.8  |
| 29(1) | 20(1) | 992.6  | 976.3  | 36.7  | 36.6  |
| 29(1) | 21(1) | 982.3  | 969.4  | 0.9   | 0.1   |
| 29(1) | 22(1) | 881.6  | 875.1  | 34.1  | 32.6  |
| 29(1) | 23(1) | 837.5  | 825.9  | 3.6   | 2.5   |
| 29(1) | 24(1) | 783.8  | 775.5  | 45.5  | 21.6  |
| 29(1) | 25(1) | 757.7  | 747.1  | 4.0   | 3.2   |
| 29(1) | 26(1) | 743.2  | 731.3  | 5.9   | 3.8   |
| 29(1) | 27(1) | 707.8  | 702.2  | 31.0  | 35.3  |
| 29(1) | 28(1) | 650.9  | 642.1  | 0.6   | 3.2   |
| 30(1) | 1(1)  | 605.6  | 598.3  | 10.7  | 10.9  |
| 30(1) | 2(1)  | 591.2  | 585.8  | 69.0  | 61.5  |
| 30(1) | 3(1)  | 577.2  | 552.1  | 68.5  | 68.1  |
| 30(1) | 4(1)  | 526.1  | 522.2  | 5.6   | 4.6   |
| 30(1) | 5(1)  | 467.7  | 463.5  | 8.8   | 12.4  |
| 30(1) | 6(1)  | 409.7  | 408.0  | 5.0   | 4.4   |
| 30(1) | 7(1)  | 395.1  | 360.2  | 99.1  | 92.2  |
| 30(1) | 8(1)  | 366.7  | 362.7  | 1.7   | 1.9   |
| 30(1) | 9(1)  | 317.3  | 314.6  | 0.5   | 0.4   |
| 30(1) | 10(1) | 291.7  | 289.0  | 0.9   | 1.0   |
| 30(1) | 11(1) | 225.4  | 223.4  | 1.7   | 2.4   |
| 30(1) | 12(1) | 197.9  | 195.2  | 0.3   | 0.3   |
| 30(1) | 13(1) | 99.0   | 99.5   | 0.0   | 0.0   |
| 30(1) | 14(1) | 40.3   | 47.1   | 0.3   | 0.3   |
| 30(1) | 15(1) | 3810.8 | 3621.9 | 86.9  | 73.1  |
| 30(1) | 16(1) | 3759.3 | 3577.0 | 96.6  | 79.1  |
| 30(1) | 17(1) | 3220.3 | 3090.6 | 0.7   | 1.5   |
| 30(1) | 18(1) | 3215.0 | 3074.9 | 0.1   | 0.0   |
| 30(1) | 19(1) | 3166.3 | 3028.9 | 10.5  | 12.1  |
| 30(1) | 20(1) | 1799.6 | 1769.2 | 413.0 | 195.9 |
| 30(1) | 21(1) | 1662.9 | 1616.9 | 253.4 | 89.3  |
| 30(1) | 22(1) | 1623.4 | 1587.0 | 132.1 | 98.0  |
| 30(1) | 23(1) | 1538.9 | 1498.0 | 43.5  | 26.8  |
| 30(1) | 24(1) | 1491.0 | 1455.3 | 45.3  | 17.7  |
| 30(1) | 25(1) | 1376.6 | 1351.2 | 37.1  | 25.9  |
| 30(1) | 26(1) | 1356.5 | 1317.2 | 10.3  | 4.5   |
| 30(1) | 27(1) | 1334.2 | 1298.8 | 192.1 | 162.1 |

|       |       |        |        |       |       |
|-------|-------|--------|--------|-------|-------|
| 30(1) | 28(1) | 1282.2 | 1254.2 | 0.7   | 0.4   |
| 30(1) | 29(1) | 1228.4 | 1207.8 | 20.5  | 18.1  |
| 31(1) | 1(1)  | 1203.6 | 1173.0 | 191.7 | 97.4  |
| 31(1) | 2(1)  | 1179.0 | 1157.0 | 21.0  | 20.3  |
| 31(1) | 3(1)  | 1151.4 | 1125.1 | 331.5 | 327.1 |
| 31(1) | 4(1)  | 1074.4 | 1048.8 | 149.3 | 95.8  |
| 31(1) | 5(1)  | 992.6  | 976.3  | 36.7  | 36.6  |
| 31(1) | 6(1)  | 982.3  | 969.4  | 0.9   | 0.1   |
| 31(1) | 7(1)  | 881.6  | 875.1  | 34.1  | 32.6  |
| 31(1) | 8(1)  | 837.5  | 825.9  | 3.6   | 2.5   |
| 31(1) | 9(1)  | 783.8  | 775.5  | 45.5  | 21.6  |
| 31(1) | 10(1) | 757.7  | 747.1  | 4.0   | 3.2   |
| 31(1) | 11(1) | 743.2  | 731.3  | 5.9   | 3.8   |
| 31(1) | 12(1) | 707.8  | 702.2  | 31.0  | 35.3  |
| 31(1) | 13(1) | 650.9  | 642.1  | 0.6   | 3.2   |
| 31(1) | 14(1) | 605.6  | 598.3  | 10.7  | 10.9  |
| 31(1) | 15(1) | 591.2  | 585.8  | 69.0  | 61.5  |
| 31(1) | 16(1) | 577.2  | 552.1  | 68.5  | 68.1  |
| 31(1) | 17(1) | 526.1  | 522.2  | 5.6   | 4.6   |
| 31(1) | 18(1) | 467.7  | 463.5  | 8.8   | 12.4  |
| 31(1) | 19(1) | 409.7  | 408.0  | 5.0   | 4.4   |
| 31(1) | 20(1) | 395.1  | 360.2  | 99.1  | 92.2  |
| 31(1) | 21(1) | 366.7  | 362.7  | 1.7   | 1.9   |
| 31(1) | 22(1) | 317.3  | 314.6  | 0.5   | 0.4   |
| 31(1) | 23(1) | 291.7  | 289.0  | 0.9   | 1.0   |
| 31(1) | 24(1) | 225.4  | 223.4  | 1.7   | 2.4   |
| 31(1) | 25(1) | 197.9  | 195.2  | 0.3   | 0.3   |
| 31(1) | 26(1) | 99.0   | 99.5   | 0.0   | 0.0   |
| 31(1) | 27(1) | 40.3   | 47.1   | 0.3   | 0.3   |
| 31(1) | 28(1) | 3810.8 | 3621.9 | 86.9  | 73.1  |
| 31(1) | 29(1) | 3759.3 | 3577.0 | 96.6  | 79.1  |
| 31(1) | 30(1) | 3220.3 | 3090.6 | 0.7   | 1.5   |
| 32(1) | 1(1)  | 3215.0 | 3074.9 | 0.1   | 0.0   |
| 32(1) | 2(1)  | 3166.3 | 3028.9 | 10.5  | 12.1  |
| 32(1) | 3(1)  | 1799.6 | 1769.2 | 413.0 | 195.9 |
| 32(1) | 4(1)  | 1662.9 | 1616.9 | 253.4 | 89.3  |
| 32(1) | 5(1)  | 1623.4 | 1587.0 | 132.1 | 98.0  |
| 32(1) | 6(1)  | 1538.9 | 1498.0 | 43.5  | 26.8  |
| 32(1) | 7(1)  | 1491.0 | 1455.3 | 45.3  | 17.7  |
| 32(1) | 8(1)  | 1376.6 | 1351.2 | 37.1  | 25.9  |

|       |       |        |        |       |       |
|-------|-------|--------|--------|-------|-------|
| 32(1) | 9(1)  | 1356.5 | 1317.2 | 10.3  | 4.5   |
| 32(1) | 10(1) | 1334.2 | 1298.8 | 192.1 | 162.1 |
| 32(1) | 11(1) | 1282.2 | 1254.2 | 0.7   | 0.4   |
| 32(1) | 12(1) | 1228.4 | 1207.8 | 20.5  | 18.1  |
| 32(1) | 13(1) | 1203.6 | 1173.0 | 191.7 | 97.4  |
| 32(1) | 14(1) | 1179.0 | 1157.0 | 21.0  | 20.3  |
| 32(1) | 15(1) | 1151.4 | 1125.1 | 331.5 | 327.1 |
| 32(1) | 16(1) | 1074.4 | 1048.8 | 149.3 | 95.8  |
| 32(1) | 17(1) | 992.6  | 976.3  | 36.7  | 36.6  |
| 32(1) | 18(1) | 982.3  | 969.4  | 0.9   | 0.1   |
| 32(1) | 19(1) | 881.6  | 875.1  | 34.1  | 32.6  |
| 32(1) | 20(1) | 837.5  | 825.9  | 3.6   | 2.5   |
| 32(1) | 21(1) | 783.8  | 775.5  | 45.5  | 21.6  |
| 32(1) | 22(1) | 757.7  | 747.1  | 4.0   | 3.2   |
| 32(1) | 23(1) | 743.2  | 731.3  | 5.9   | 3.8   |
| 32(1) | 24(1) | 707.8  | 702.2  | 31.0  | 35.3  |
| 32(1) | 25(1) | 650.9  | 642.1  | 0.6   | 3.2   |
| 32(1) | 26(1) | 605.6  | 598.3  | 10.7  | 10.9  |
| 32(1) | 27(1) | 591.2  | 585.8  | 69.0  | 61.5  |
| 32(1) | 28(1) | 577.2  | 552.1  | 68.5  | 68.1  |
| 32(1) | 29(1) | 526.1  | 522.2  | 5.6   | 4.6   |
| 32(1) | 30(1) | 467.7  | 463.5  | 8.8   | 12.4  |
| 32(1) | 31(1) | 409.7  | 408.0  | 5.0   | 4.4   |
| 33(1) | 1(1)  | 395.1  | 360.2  | 99.1  | 92.2  |
| 33(1) | 2(1)  | 366.7  | 362.7  | 1.7   | 1.9   |
| 33(1) | 3(1)  | 317.3  | 314.6  | 0.5   | 0.4   |
| 33(1) | 4(1)  | 291.7  | 289.0  | 0.9   | 1.0   |
| 33(1) | 5(1)  | 225.4  | 223.4  | 1.7   | 2.4   |
| 33(1) | 6(1)  | 197.9  | 195.2  | 0.3   | 0.3   |
| 33(1) | 7(1)  | 99.0   | 99.5   | 0.0   | 0.0   |
| 33(1) | 8(1)  | 40.3   | 47.1   | 0.3   | 0.3   |
| 33(1) | 9(1)  | 3810.8 | 3621.9 | 86.9  | 73.1  |
| 33(1) | 10(1) | 3759.3 | 3577.0 | 96.6  | 79.1  |
| 33(1) | 11(1) | 3220.3 | 3090.6 | 0.7   | 1.5   |
| 33(1) | 12(1) | 3215.0 | 3074.9 | 0.1   | 0.0   |
| 33(1) | 13(1) | 3166.3 | 3028.9 | 10.5  | 12.1  |
| 33(1) | 14(1) | 1799.6 | 1769.2 | 413.0 | 195.9 |
| 33(1) | 15(1) | 1662.9 | 1616.9 | 253.4 | 89.3  |
| 33(1) | 16(1) | 1623.4 | 1587.0 | 132.1 | 98.0  |
| 33(1) | 17(1) | 1538.9 | 1498.0 | 43.5  | 26.8  |

|       |       |        |        |       |       |
|-------|-------|--------|--------|-------|-------|
| 33(1) | 18(1) | 1491.0 | 1455.3 | 45.3  | 17.7  |
| 33(1) | 19(1) | 1376.6 | 1351.2 | 37.1  | 25.9  |
| 33(1) | 20(1) | 1356.5 | 1317.2 | 10.3  | 4.5   |
| 33(1) | 21(1) | 1334.2 | 1298.8 | 192.1 | 162.1 |
| 33(1) | 22(1) | 1282.2 | 1254.2 | 0.7   | 0.4   |
| 33(1) | 23(1) | 1228.4 | 1207.8 | 20.5  | 18.1  |
| 33(1) | 24(1) | 1203.6 | 1173.0 | 191.7 | 97.4  |
| 33(1) | 25(1) | 1179.0 | 1157.0 | 21.0  | 20.3  |
| 33(1) | 26(1) | 1151.4 | 1125.1 | 331.5 | 327.1 |
| 33(1) | 27(1) | 1074.4 | 1048.8 | 149.3 | 95.8  |
| 33(1) | 28(1) | 992.6  | 976.3  | 36.7  | 36.6  |
| 33(1) | 29(1) | 982.3  | 969.4  | 0.9   | 0.1   |
| 33(1) | 30(1) | 881.6  | 875.1  | 34.1  | 32.6  |
| 33(1) | 31(1) | 837.5  | 825.9  | 3.6   | 2.5   |
| 33(1) | 32(1) | 783.8  | 775.5  | 45.5  | 21.6  |
| 34(1) | 1(1)  | 757.7  | 747.1  | 4.0   | 3.2   |
| 34(1) | 2(1)  | 743.2  | 731.3  | 5.9   | 3.8   |
| 34(1) | 3(1)  | 707.8  | 702.2  | 31.0  | 35.3  |
| 34(1) | 4(1)  | 650.9  | 642.1  | 0.6   | 3.2   |
| 34(1) | 5(1)  | 605.6  | 598.3  | 10.7  | 10.9  |
| 34(1) | 6(1)  | 591.2  | 585.8  | 69.0  | 61.5  |
| 34(1) | 7(1)  | 577.2  | 552.1  | 68.5  | 68.1  |
| 34(1) | 8(1)  | 526.1  | 522.2  | 5.6   | 4.6   |
| 34(1) | 9(1)  | 467.7  | 463.5  | 8.8   | 12.4  |
| 34(1) | 10(1) | 409.7  | 408.0  | 5.0   | 4.4   |
| 34(1) | 11(1) | 395.1  | 360.2  | 99.1  | 92.2  |
| 34(1) | 12(1) | 366.7  | 362.7  | 1.7   | 1.9   |
| 34(1) | 13(1) | 317.3  | 314.6  | 0.5   | 0.4   |
| 34(1) | 14(1) | 291.7  | 289.0  | 0.9   | 1.0   |
| 34(1) | 15(1) | 225.4  | 223.4  | 1.7   | 2.4   |
| 34(1) | 16(1) | 197.9  | 195.2  | 0.3   | 0.3   |
| 34(1) | 17(1) | 99.0   | 99.5   | 0.0   | 0.0   |
| 34(1) | 18(1) | 40.3   | 47.1   | 0.3   | 0.3   |
| 34(1) | 19(1) | 3810.8 | 3621.9 | 86.9  | 73.1  |
| 34(1) | 20(1) | 3759.3 | 3577.0 | 96.6  | 79.1  |
| 34(1) | 21(1) | 3220.3 | 3090.6 | 0.7   | 1.5   |
| 34(1) | 22(1) | 3215.0 | 3074.9 | 0.1   | 0.0   |
| 34(1) | 23(1) | 3166.3 | 3028.9 | 10.5  | 12.1  |
| 34(1) | 24(1) | 1799.6 | 1769.2 | 413.0 | 195.9 |
| 34(1) | 25(1) | 1662.9 | 1616.9 | 253.4 | 89.3  |

|       |       |        |        |       |       |
|-------|-------|--------|--------|-------|-------|
| 34(1) | 26(1) | 1623.4 | 1587.0 | 132.1 | 98.0  |
| 34(1) | 27(1) | 1538.9 | 1498.0 | 43.5  | 26.8  |
| 34(1) | 28(1) | 1491.0 | 1455.3 | 45.3  | 17.7  |
| 34(1) | 29(1) | 1376.6 | 1351.2 | 37.1  | 25.9  |
| 34(1) | 30(1) | 1356.5 | 1317.2 | 10.3  | 4.5   |
| 34(1) | 31(1) | 1334.2 | 1298.8 | 192.1 | 162.1 |
| 34(1) | 32(1) | 1282.2 | 1254.2 | 0.7   | 0.4   |
| 34(1) | 33(1) | 1228.4 | 1207.8 | 20.5  | 18.1  |
| 35(1) | 1(1)  | 1203.6 | 1173.0 | 191.7 | 97.4  |
| 35(1) | 2(1)  | 1179.0 | 1157.0 | 21.0  | 20.3  |
| 35(1) | 3(1)  | 1151.4 | 1125.1 | 331.5 | 327.1 |
| 35(1) | 4(1)  | 1074.4 | 1048.8 | 149.3 | 95.8  |
| 35(1) | 5(1)  | 992.6  | 976.3  | 36.7  | 36.6  |
| 35(1) | 6(1)  | 982.3  | 969.4  | 0.9   | 0.1   |
| 35(1) | 7(1)  | 881.6  | 875.1  | 34.1  | 32.6  |
| 35(1) | 8(1)  | 837.5  | 825.9  | 3.6   | 2.5   |
| 35(1) | 9(1)  | 783.8  | 775.5  | 45.5  | 21.6  |
| 35(1) | 10(1) | 757.7  | 747.1  | 4.0   | 3.2   |
| 35(1) | 11(1) | 743.2  | 731.3  | 5.9   | 3.8   |
| 35(1) | 12(1) | 707.8  | 702.2  | 31.0  | 35.3  |
| 35(1) | 13(1) | 650.9  | 642.1  | 0.6   | 3.2   |
| 35(1) | 14(1) | 605.6  | 598.3  | 10.7  | 10.9  |
| 35(1) | 15(1) | 591.2  | 585.8  | 69.0  | 61.5  |
| 35(1) | 16(1) | 577.2  | 552.1  | 68.5  | 68.1  |
| 35(1) | 17(1) | 526.1  | 522.2  | 5.6   | 4.6   |
| 35(1) | 18(1) | 467.7  | 463.5  | 8.8   | 12.4  |
| 35(1) | 19(1) | 409.7  | 408.0  | 5.0   | 4.4   |
| 35(1) | 20(1) | 395.1  | 360.2  | 99.1  | 92.2  |
| 35(1) | 21(1) | 366.7  | 362.7  | 1.7   | 1.9   |
| 35(1) | 22(1) | 317.3  | 314.6  | 0.5   | 0.4   |
| 35(1) | 23(1) | 291.7  | 289.0  | 0.9   | 1.0   |
| 35(1) | 24(1) | 225.4  | 223.4  | 1.7   | 2.4   |
| 35(1) | 25(1) | 197.9  | 195.2  | 0.3   | 0.3   |
| 35(1) | 26(1) | 99.0   | 99.5   | 0.0   | 0.0   |
| 35(1) | 27(1) | 40.3   | 47.1   | 0.3   | 0.3   |
| 35(1) | 28(1) | 3810.8 | 3621.9 | 86.9  | 73.1  |
| 35(1) | 29(1) | 3759.3 | 3577.0 | 96.6  | 79.1  |
| 35(1) | 30(1) | 3220.3 | 3090.6 | 0.7   | 1.5   |
| 35(1) | 31(1) | 3215.0 | 3074.9 | 0.1   | 0.0   |
| 35(1) | 32(1) | 3166.3 | 3028.9 | 10.5  | 12.1  |

|       |       |        |        |       |       |
|-------|-------|--------|--------|-------|-------|
| 35(1) | 33(1) | 1799.6 | 1769.2 | 413.0 | 195.9 |
| 35(1) | 34(1) | 1662.9 | 1616.9 | 253.4 | 89.3  |
| 36(1) | 1(1)  | 1623.4 | 1587.0 | 132.1 | 98.0  |
| 36(1) | 2(1)  | 1538.9 | 1498.0 | 43.5  | 26.8  |
| 36(1) | 3(1)  | 1491.0 | 1455.3 | 45.3  | 17.7  |
| 36(1) | 4(1)  | 1376.6 | 1351.2 | 37.1  | 25.9  |
| 36(1) | 5(1)  | 1356.5 | 1317.2 | 10.3  | 4.5   |
| 36(1) | 6(1)  | 1334.2 | 1298.8 | 192.1 | 162.1 |
| 36(1) | 7(1)  | 1282.2 | 1254.2 | 0.7   | 0.4   |
| 36(1) | 8(1)  | 1228.4 | 1207.8 | 20.5  | 18.1  |
| 36(1) | 9(1)  | 1203.6 | 1173.0 | 191.7 | 97.4  |
| 36(1) | 10(1) | 1179.0 | 1157.0 | 21.0  | 20.3  |
| 36(1) | 11(1) | 1151.4 | 1125.1 | 331.5 | 327.1 |
| 36(1) | 12(1) | 1074.4 | 1048.8 | 149.3 | 95.8  |
| 36(1) | 13(1) | 992.6  | 976.3  | 36.7  | 36.6  |
| 36(1) | 14(1) | 982.3  | 969.4  | 0.9   | 0.1   |
| 36(1) | 15(1) | 881.6  | 875.1  | 34.1  | 32.6  |
| 36(1) | 16(1) | 837.5  | 825.9  | 3.6   | 2.5   |
| 36(1) | 17(1) | 783.8  | 775.5  | 45.5  | 21.6  |
| 36(1) | 18(1) | 757.7  | 747.1  | 4.0   | 3.2   |
| 36(1) | 19(1) | 743.2  | 731.3  | 5.9   | 3.8   |
| 36(1) | 20(1) | 707.8  | 702.2  | 31.0  | 35.3  |
| 36(1) | 21(1) | 650.9  | 642.1  | 0.6   | 3.2   |
| 36(1) | 22(1) | 605.6  | 598.3  | 10.7  | 10.9  |
| 36(1) | 23(1) | 591.2  | 585.8  | 69.0  | 61.5  |
| 36(1) | 24(1) | 577.2  | 552.1  | 68.5  | 68.1  |
| 36(1) | 25(1) | 526.1  | 522.2  | 5.6   | 4.6   |
| 36(1) | 26(1) | 467.7  | 463.5  | 8.8   | 12.4  |
| 36(1) | 27(1) | 409.7  | 408.0  | 5.0   | 4.4   |
| 36(1) | 28(1) | 395.1  | 360.2  | 99.1  | 92.2  |
| 36(1) | 29(1) | 366.7  | 362.7  | 1.7   | 1.9   |
| 36(1) | 30(1) | 317.3  | 314.6  | 0.5   | 0.4   |
| 36(1) | 31(1) | 291.7  | 289.0  | 0.9   | 1.0   |
| 36(1) | 32(1) | 225.4  | 223.4  | 1.7   | 2.4   |
| 36(1) | 33(1) | 197.9  | 195.2  | 0.3   | 0.3   |
| 36(1) | 34(1) | 99.0   | 99.5   | 0.0   | 0.0   |
| 36(1) | 35(1) | 40.3   | 47.1   | 0.3   | 0.3   |
| 37(1) | 1(1)  | 3810.8 | 3621.9 | 86.9  | 73.1  |
| 37(1) | 2(1)  | 3759.3 | 3577.0 | 96.6  | 79.1  |
| 37(1) | 3(1)  | 3220.3 | 3090.6 | 0.7   | 1.5   |



|       |       |        |        |       |       |
|-------|-------|--------|--------|-------|-------|
| 37(1) | 4(1)  | 3215.0 | 3074.9 | 0.1   | 0.0   |
| 37(1) | 5(1)  | 3166.3 | 3028.9 | 10.5  | 12.1  |
| 37(1) | 6(1)  | 1799.6 | 1769.2 | 413.0 | 195.9 |
| 37(1) | 7(1)  | 1662.9 | 1616.9 | 253.4 | 89.3  |
| 37(1) | 8(1)  | 1623.4 | 1587.0 | 132.1 | 98.0  |
| 37(1) | 9(1)  | 1538.9 | 1498.0 | 43.5  | 26.8  |
| 37(1) | 10(1) | 1491.0 | 1455.3 | 45.3  | 17.7  |
| 37(1) | 11(1) | 1376.6 | 1351.2 | 37.1  | 25.9  |
| 37(1) | 12(1) | 1356.5 | 1317.2 | 10.3  | 4.5   |
| 37(1) | 13(1) | 1334.2 | 1298.8 | 192.1 | 162.1 |
| 37(1) | 14(1) | 1282.2 | 1254.2 | 0.7   | 0.4   |
| 37(1) | 15(1) | 1228.4 | 1207.8 | 20.5  | 18.1  |
| 37(1) | 16(1) | 1203.6 | 1173.0 | 191.7 | 97.4  |
| 37(1) | 17(1) | 1179.0 | 1157.0 | 21.0  | 20.3  |
| 37(1) | 18(1) | 1151.4 | 1125.1 | 331.5 | 327.1 |
| 37(1) | 19(1) | 1074.4 | 1048.8 | 149.3 | 95.8  |
| 37(1) | 20(1) | 992.6  | 976.3  | 36.7  | 36.6  |
| 37(1) | 21(1) | 982.3  | 969.4  | 0.9   | 0.1   |
| 37(1) | 22(1) | 881.6  | 875.1  | 34.1  | 32.6  |
| 37(1) | 23(1) | 837.5  | 825.9  | 3.6   | 2.5   |
| 37(1) | 24(1) | 783.8  | 775.5  | 45.5  | 21.6  |
| 37(1) | 25(1) | 757.7  | 747.1  | 4.0   | 3.2   |
| 37(1) | 26(1) | 743.2  | 731.3  | 5.9   | 3.8   |
| 37(1) | 27(1) | 707.8  | 702.2  | 31.0  | 35.3  |
| 37(1) | 28(1) | 650.9  | 642.1  | 0.6   | 3.2   |
| 37(1) | 29(1) | 605.6  | 598.3  | 10.7  | 10.9  |
| 37(1) | 30(1) | 591.2  | 585.8  | 69.0  | 61.5  |
| 37(1) | 31(1) | 577.2  | 552.1  | 68.5  | 68.1  |
| 37(1) | 32(1) | 526.1  | 522.2  | 5.6   | 4.6   |
| 37(1) | 33(1) | 467.7  | 463.5  | 8.8   | 12.4  |
| 37(1) | 34(1) | 409.7  | 408.0  | 5.0   | 4.4   |
| 37(1) | 35(1) | 395.1  | 360.2  | 99.1  | 92.2  |
| 37(1) | 36(1) | 366.7  | 362.7  | 1.7   | 1.9   |
| 38(1) | 1(1)  | 317.3  | 314.6  | 0.5   | 0.4   |
| 38(1) | 2(1)  | 291.7  | 289.0  | 0.9   | 1.0   |
| 38(1) | 3(1)  | 225.4  | 223.4  | 1.7   | 2.4   |
| 38(1) | 4(1)  | 197.9  | 195.2  | 0.3   | 0.3   |
| 38(1) | 5(1)  | 99.0   | 99.5   | 0.0   | 0.0   |
| 38(1) | 6(1)  | 40.3   | 47.1   | 0.3   | 0.3   |
| 38(1) | 7(1)  | 3810.8 | 3621.9 | 86.9  | 73.1  |

|       |       |        |        |       |       |
|-------|-------|--------|--------|-------|-------|
| 38(1) | 8(1)  | 3759.3 | 3577.0 | 96.6  | 79.1  |
| 38(1) | 9(1)  | 3220.3 | 3090.6 | 0.7   | 1.5   |
| 38(1) | 10(1) | 3215.0 | 3074.9 | 0.1   | 0.0   |
| 38(1) | 11(1) | 3166.3 | 3028.9 | 10.5  | 12.1  |
| 38(1) | 12(1) | 1799.6 | 1769.2 | 413.0 | 195.9 |
| 38(1) | 13(1) | 1662.9 | 1616.9 | 253.4 | 89.3  |
| 38(1) | 14(1) | 1623.4 | 1587.0 | 132.1 | 98.0  |
| 38(1) | 15(1) | 1538.9 | 1498.0 | 43.5  | 26.8  |
| 38(1) | 16(1) | 1491.0 | 1455.3 | 45.3  | 17.7  |
| 38(1) | 17(1) | 1376.6 | 1351.2 | 37.1  | 25.9  |
| 38(1) | 18(1) | 1356.5 | 1317.2 | 10.3  | 4.5   |
| 38(1) | 19(1) | 1334.2 | 1298.8 | 192.1 | 162.1 |
| 38(1) | 20(1) | 1282.2 | 1254.2 | 0.7   | 0.4   |
| 38(1) | 21(1) | 1228.4 | 1207.8 | 20.5  | 18.1  |
| 38(1) | 22(1) | 1203.6 | 1173.0 | 191.7 | 97.4  |
| 38(1) | 23(1) | 1179.0 | 1157.0 | 21.0  | 20.3  |
| 38(1) | 24(1) | 1151.4 | 1125.1 | 331.5 | 327.1 |
| 38(1) | 25(1) | 1074.4 | 1048.8 | 149.3 | 95.8  |
| 38(1) | 26(1) | 992.6  | 976.3  | 36.7  | 36.6  |
| 38(1) | 27(1) | 982.3  | 969.4  | 0.9   | 0.1   |
| 38(1) | 28(1) | 881.6  | 875.1  | 34.1  | 32.6  |
| 38(1) | 29(1) | 837.5  | 825.9  | 3.6   | 2.5   |
| 38(1) | 30(1) | 783.8  | 775.5  | 45.5  | 21.6  |
| 38(1) | 31(1) | 757.7  | 747.1  | 4.0   | 3.2   |
| 38(1) | 32(1) | 743.2  | 731.3  | 5.9   | 3.8   |
| 38(1) | 33(1) | 707.8  | 702.2  | 31.0  | 35.3  |
| 38(1) | 34(1) | 650.9  | 642.1  | 0.6   | 3.2   |
| 38(1) | 35(1) | 605.6  | 598.3  | 10.7  | 10.9  |
| 38(1) | 36(1) | 591.2  | 585.8  | 69.0  | 61.5  |
| 38(1) | 37(1) | 577.2  | 552.1  | 68.5  | 68.1  |
| 39(1) | 1(1)  | 526.1  | 522.2  | 5.6   | 4.6   |
| 39(1) | 2(1)  | 467.7  | 463.5  | 8.8   | 12.4  |
| 39(1) | 3(1)  | 409.7  | 408.0  | 5.0   | 4.4   |
| 39(1) | 4(1)  | 395.1  | 360.2  | 99.1  | 92.2  |
| 39(1) | 5(1)  | 366.7  | 362.7  | 1.7   | 1.9   |
| 39(1) | 6(1)  | 317.3  | 314.6  | 0.5   | 0.4   |
| 39(1) | 7(1)  | 291.7  | 289.0  | 0.9   | 1.0   |
| 39(1) | 8(1)  | 225.4  | 223.4  | 1.7   | 2.4   |
| 39(1) | 9(1)  | 197.9  | 195.2  | 0.3   | 0.3   |
| 39(1) | 10(1) | 99.0   | 99.5   | 0.0   | 0.0   |

|       |       |        |        |       |       |
|-------|-------|--------|--------|-------|-------|
| 39(1) | 11(1) | 40.3   | 47.1   | 0.3   | 0.3   |
| 39(1) | 12(1) | 3810.8 | 3621.9 | 86.9  | 73.1  |
| 39(1) | 13(1) | 3759.3 | 3577.0 | 96.6  | 79.1  |
| 39(1) | 14(1) | 3220.3 | 3090.6 | 0.7   | 1.5   |
| 39(1) | 15(1) | 3215.0 | 3074.9 | 0.1   | 0.0   |
| 39(1) | 16(1) | 3166.3 | 3028.9 | 10.5  | 12.1  |
| 39(1) | 17(1) | 1799.6 | 1769.2 | 413.0 | 195.9 |
| 39(1) | 18(1) | 1662.9 | 1616.9 | 253.4 | 89.3  |
| 39(1) | 19(1) | 1623.4 | 1587.0 | 132.1 | 98.0  |
| 39(1) | 20(1) | 1538.9 | 1498.0 | 43.5  | 26.8  |
| 39(1) | 21(1) | 1491.0 | 1455.3 | 45.3  | 17.7  |
| 39(1) | 22(1) | 1376.6 | 1351.2 | 37.1  | 25.9  |
| 39(1) | 23(1) | 1356.5 | 1317.2 | 10.3  | 4.5   |
| 39(1) | 24(1) | 1334.2 | 1298.8 | 192.1 | 162.1 |
| 39(1) | 25(1) | 1282.2 | 1254.2 | 0.7   | 0.4   |
| 39(1) | 26(1) | 1228.4 | 1207.8 | 20.5  | 18.1  |
| 39(1) | 27(1) | 1203.6 | 1173.0 | 191.7 | 97.4  |
| 39(1) | 28(1) | 1179.0 | 1157.0 | 21.0  | 20.3  |
| 39(1) | 29(1) | 1151.4 | 1125.1 | 331.5 | 327.1 |
| 39(1) | 30(1) | 1074.4 | 1048.8 | 149.3 | 95.8  |
| 39(1) | 31(1) | 992.6  | 976.3  | 36.7  | 36.6  |
| 39(1) | 32(1) | 982.3  | 969.4  | 0.9   | 0.1   |
| 39(1) | 33(1) | 881.6  | 875.1  | 34.1  | 32.6  |
| 39(1) | 34(1) | 837.5  | 825.9  | 3.6   | 2.5   |
| 39(1) | 35(1) | 783.8  | 775.5  | 45.5  | 21.6  |
| 39(1) | 36(1) | 757.7  | 747.1  | 4.0   | 3.2   |
| 39(1) | 37(1) | 743.2  | 731.3  | 5.9   | 3.8   |
| 39(1) | 38(1) | 707.8  | 702.2  | 31.0  | 35.3  |
| 40(1) | 1(1)  | 650.9  | 642.1  | 0.6   | 3.2   |
| 40(1) | 2(1)  | 605.6  | 598.3  | 10.7  | 10.9  |
| 40(1) | 3(1)  | 591.2  | 585.8  | 69.0  | 61.5  |
| 40(1) | 4(1)  | 577.2  | 552.1  | 68.5  | 68.1  |
| 40(1) | 5(1)  | 526.1  | 522.2  | 5.6   | 4.6   |
| 40(1) | 6(1)  | 467.7  | 463.5  | 8.8   | 12.4  |
| 40(1) | 7(1)  | 409.7  | 408.0  | 5.0   | 4.4   |
| 40(1) | 8(1)  | 395.1  | 360.2  | 99.1  | 92.2  |
| 40(1) | 9(1)  | 366.7  | 362.7  | 1.7   | 1.9   |
| 40(1) | 10(1) | 317.3  | 314.6  | 0.5   | 0.4   |
| 40(1) | 11(1) | 291.7  | 289.0  | 0.9   | 1.0   |
| 40(1) | 12(1) | 225.4  | 223.4  | 1.7   | 2.4   |

|       |       |        |        |       |       |
|-------|-------|--------|--------|-------|-------|
| 40(1) | 13(1) | 197.9  | 195.2  | 0.3   | 0.3   |
| 40(1) | 14(1) | 99.0   | 99.5   | 0.0   | 0.0   |
| 40(1) | 15(1) | 40.3   | 47.1   | 0.3   | 0.3   |
| 40(1) | 16(1) | 3810.8 | 3621.9 | 86.9  | 73.1  |
| 40(1) | 17(1) | 3759.3 | 3577.0 | 96.6  | 79.1  |
| 40(1) | 18(1) | 3220.3 | 3090.6 | 0.7   | 1.5   |
| 40(1) | 19(1) | 3215.0 | 3074.9 | 0.1   | 0.0   |
| 40(1) | 20(1) | 3166.3 | 3028.9 | 10.5  | 12.1  |
| 40(1) | 21(1) | 1799.6 | 1769.2 | 413.0 | 195.9 |
| 40(1) | 22(1) | 1662.9 | 1616.9 | 253.4 | 89.3  |
| 40(1) | 23(1) | 1623.4 | 1587.0 | 132.1 | 98.0  |
| 40(1) | 24(1) | 1538.9 | 1498.0 | 43.5  | 26.8  |
| 40(1) | 25(1) | 1491.0 | 1455.3 | 45.3  | 17.7  |
| 40(1) | 26(1) | 1376.6 | 1351.2 | 37.1  | 25.9  |
| 40(1) | 27(1) | 1356.5 | 1317.2 | 10.3  | 4.5   |
| 40(1) | 28(1) | 1334.2 | 1298.8 | 192.1 | 162.1 |
| 40(1) | 29(1) | 1282.2 | 1254.2 | 0.7   | 0.4   |
| 40(1) | 30(1) | 1228.4 | 1207.8 | 20.5  | 18.1  |
| 40(1) | 31(1) | 1203.6 | 1173.0 | 191.7 | 97.4  |
| 40(1) | 32(1) | 1179.0 | 1157.0 | 21.0  | 20.3  |
| 40(1) | 33(1) | 1151.4 | 1125.1 | 331.5 | 327.1 |
| 40(1) | 34(1) | 1074.4 | 1048.8 | 149.3 | 95.8  |
| 40(1) | 35(1) | 992.6  | 976.3  | 36.7  | 36.6  |
| 40(1) | 36(1) | 982.3  | 969.4  | 0.9   | 0.1   |
| 40(1) | 37(1) | 881.6  | 875.1  | 34.1  | 32.6  |
| 40(1) | 38(1) | 837.5  | 825.9  | 3.6   | 2.5   |
| 40(1) | 39(1) | 783.8  | 775.5  | 45.5  | 21.6  |
| 41(1) | 1(1)  | 757.7  | 747.1  | 4.0   | 3.2   |
| 41(1) | 2(1)  | 743.2  | 731.3  | 5.9   | 3.8   |
| 41(1) | 3(1)  | 707.8  | 702.2  | 31.0  | 35.3  |
| 41(1) | 4(1)  | 650.9  | 642.1  | 0.6   | 3.2   |
| 41(1) | 5(1)  | 605.6  | 598.3  | 10.7  | 10.9  |
| 41(1) | 6(1)  | 591.2  | 585.8  | 69.0  | 61.5  |
| 41(1) | 7(1)  | 577.2  | 552.1  | 68.5  | 68.1  |
| 41(1) | 8(1)  | 526.1  | 522.2  | 5.6   | 4.6   |
| 41(1) | 9(1)  | 467.7  | 463.5  | 8.8   | 12.4  |
| 41(1) | 10(1) | 409.7  | 408.0  | 5.0   | 4.4   |
| 41(1) | 11(1) | 395.1  | 360.2  | 99.1  | 92.2  |
| 41(1) | 12(1) | 366.7  | 362.7  | 1.7   | 1.9   |
| 41(1) | 13(1) | 317.3  | 314.6  | 0.5   | 0.4   |

|       |       |        |        |       |       |
|-------|-------|--------|--------|-------|-------|
| 41(1) | 14(1) | 291.7  | 289.0  | 0.9   | 1.0   |
| 41(1) | 15(1) | 225.4  | 223.4  | 1.7   | 2.4   |
| 41(1) | 16(1) | 197.9  | 195.2  | 0.3   | 0.3   |
| 41(1) | 17(1) | 99.0   | 99.5   | 0.0   | 0.0   |
| 41(1) | 18(1) | 40.3   | 47.1   | 0.3   | 0.3   |
| 41(1) | 19(1) | 3810.8 | 3621.9 | 86.9  | 73.1  |
| 41(1) | 20(1) | 3759.3 | 3577.0 | 96.6  | 79.1  |
| 41(1) | 21(1) | 3220.3 | 3090.6 | 0.7   | 1.5   |
| 41(1) | 22(1) | 3215.0 | 3074.9 | 0.1   | 0.0   |
| 41(1) | 23(1) | 3166.3 | 3028.9 | 10.5  | 12.1  |
| 41(1) | 24(1) | 1799.6 | 1769.2 | 413.0 | 195.9 |
| 41(1) | 25(1) | 1662.9 | 1616.9 | 253.4 | 89.3  |
| 41(1) | 26(1) | 1623.4 | 1587.0 | 132.1 | 98.0  |
| 41(1) | 27(1) | 1538.9 | 1498.0 | 43.5  | 26.8  |
| 41(1) | 28(1) | 1491.0 | 1455.3 | 45.3  | 17.7  |
| 41(1) | 29(1) | 1376.6 | 1351.2 | 37.1  | 25.9  |
| 41(1) | 30(1) | 1356.5 | 1317.2 | 10.3  | 4.5   |
| 41(1) | 31(1) | 1334.2 | 1298.8 | 192.1 | 162.1 |
| 41(1) | 32(1) | 1282.2 | 1254.2 | 0.7   | 0.4   |
| 41(1) | 33(1) | 1228.4 | 1207.8 | 20.5  | 18.1  |
| 41(1) | 34(1) | 1203.6 | 1173.0 | 191.7 | 97.4  |
| 41(1) | 35(1) | 1179.0 | 1157.0 | 21.0  | 20.3  |
| 41(1) | 36(1) | 1151.4 | 1125.1 | 331.5 | 327.1 |
| 41(1) | 37(1) | 1074.4 | 1048.8 | 149.3 | 95.8  |
| 41(1) | 38(1) | 992.6  | 976.3  | 36.7  | 36.6  |
| 41(1) | 39(1) | 982.3  | 969.4  | 0.9   | 0.1   |
| 41(1) | 40(1) | 881.6  | 875.1  | 34.1  | 32.6  |
| 42(1) | 1(1)  | 837.5  | 825.9  | 3.6   | 2.5   |
| 42(1) | 2(1)  | 783.8  | 775.5  | 45.5  | 21.6  |
| 42(1) | 3(1)  | 757.7  | 747.1  | 4.0   | 3.2   |
| 42(1) | 4(1)  | 743.2  | 731.3  | 5.9   | 3.8   |
| 42(1) | 5(1)  | 707.8  | 702.2  | 31.0  | 35.3  |
| 42(1) | 6(1)  | 650.9  | 642.1  | 0.6   | 3.2   |
| 42(1) | 7(1)  | 605.6  | 598.3  | 10.7  | 10.9  |
| 42(1) | 8(1)  | 591.2  | 585.8  | 69.0  | 61.5  |
| 42(1) | 9(1)  | 577.2  | 552.1  | 68.5  | 68.1  |
| 42(1) | 10(1) | 526.1  | 522.2  | 5.6   | 4.6   |
| 42(1) | 11(1) | 467.7  | 463.5  | 8.8   | 12.4  |
| 42(1) | 12(1) | 409.7  | 408.0  | 5.0   | 4.4   |
| 42(1) | 13(1) | 395.1  | 360.2  | 99.1  | 92.2  |

|       |       |        |        |       |       |
|-------|-------|--------|--------|-------|-------|
| 42(1) | 14(1) | 366.7  | 362.7  | 1.7   | 1.9   |
| 42(1) | 15(1) | 317.3  | 314.6  | 0.5   | 0.4   |
| 42(1) | 16(1) | 291.7  | 289.0  | 0.9   | 1.0   |
| 42(1) | 17(1) | 225.4  | 223.4  | 1.7   | 2.4   |
| 42(1) | 18(1) | 197.9  | 195.2  | 0.3   | 0.3   |
| 42(1) | 19(1) | 99.0   | 99.5   | 0.0   | 0.0   |
| 42(1) | 20(1) | 40.3   | 47.1   | 0.3   | 0.3   |
| 42(1) | 21(1) | 3810.8 | 3621.9 | 86.9  | 73.1  |
| 42(1) | 22(1) | 3759.3 | 3577.0 | 96.6  | 79.1  |
| 42(1) | 23(1) | 3220.3 | 3090.6 | 0.7   | 1.5   |
| 42(1) | 24(1) | 3215.0 | 3074.9 | 0.1   | 0.0   |
| 42(1) | 25(1) | 3166.3 | 3028.9 | 10.5  | 12.1  |
| 42(1) | 26(1) | 1799.6 | 1769.2 | 413.0 | 195.9 |
| 42(1) | 27(1) | 1662.9 | 1616.9 | 253.4 | 89.3  |
| 42(1) | 28(1) | 1623.4 | 1587.0 | 132.1 | 98.0  |
| 42(1) | 29(1) | 1538.9 | 1498.0 | 43.5  | 26.8  |
| 42(1) | 30(1) | 1491.0 | 1455.3 | 45.3  | 17.7  |
| 42(1) | 31(1) | 1376.6 | 1351.2 | 37.1  | 25.9  |
| 42(1) | 32(1) | 1356.5 | 1317.2 | 10.3  | 4.5   |
| 42(1) | 33(1) | 1334.2 | 1298.8 | 192.1 | 162.1 |
| 42(1) | 34(1) | 1282.2 | 1254.2 | 0.7   | 0.4   |
| 42(1) | 35(1) | 1228.4 | 1207.8 | 20.5  | 18.1  |
| 42(1) | 36(1) | 1203.6 | 1173.0 | 191.7 | 97.4  |
| 42(1) | 37(1) | 1179.0 | 1157.0 | 21.0  | 20.3  |
| 42(1) | 38(1) | 1151.4 | 1125.1 | 331.5 | 327.1 |
| 42(1) | 39(1) | 1074.4 | 1048.8 | 149.3 | 95.8  |
| 42(1) | 40(1) | 992.6  | 976.3  | 36.7  | 36.6  |
| 42(1) | 41(1) | 982.3  | 969.4  | 0.9   | 0.1   |

**Table S13.** Harmonic and anharmonic vibrational frequencies and their intensities of conformer **B1** as computed at the B3LYP/cc-pVTZ level of theory.

| Mode (quanta) | $\nu_{\text{harm}}$<br>( $\text{cm}^{-1}$ ) | $\nu_{\text{anharm}}$<br>( $\text{cm}^{-1}$ ) | $I_{\text{harm}}$<br>( $\text{km mol}^{-1}$ ) | $I_{\text{anharm}}$<br>( $\text{km mol}^{-1}$ ) |
|---------------|---------------------------------------------|-----------------------------------------------|-----------------------------------------------|-------------------------------------------------|
| 1(1)          | 3811.1                                      | 3628.5                                        | 85.9                                          | 70.3                                            |
| 2(1)          | 3745.2                                      | 3567.4                                        | 90.3                                          | 76.5                                            |
| 3(1)          | 3211.6                                      | 3086.3                                        | 2.8                                           | 3.9                                             |
| 4(1)          | 3198.8                                      | 3068.1                                        | 0.4                                           | 0.5                                             |
| 5(1)          | 3182.4                                      | 3049.1                                        | 2.5                                           | 3.3                                             |
| 6(1)          | 1776.7                                      | 1742.1                                        | 364.6                                         | 316.4                                           |
| 7(1)          | 1660.6                                      | 1617.1                                        | 321.8                                         | 229.1                                           |
| 8(1)          | 1625.8                                      | 1586.5                                        | 73.3                                          | 54.1                                            |
| 9(1)          | 1542.2                                      | 1508.3                                        | 43.3                                          | 33.5                                            |
| 10(1)         | 1489.5                                      | 1458.9                                        | 52.4                                          | 39.1                                            |
| 11(1)         | 1383.4                                      | 1337.9                                        | 168.7                                         | 94.9                                            |
| 12(1)         | 1366.3                                      | 1336.1                                        | 21.6                                          | 4.9                                             |
| 13(1)         | 1345.0                                      | 1313.9                                        | 32.9                                          | 10.7                                            |
| 14(1)         | 1274.4                                      | 1247.2                                        | 125.9                                         | 72.7                                            |
| 15(1)         | 1212.5                                      | 1181.4                                        | 91.8                                          | 117.2                                           |
| 16(1)         | 1202.8                                      | 1174.6                                        | 247.1                                         | 74.0                                            |
| 17(1)         | 1186.2                                      | 1164.0                                        | 126.4                                         | 149.1                                           |
| 18(1)         | 1132.0                                      | 1116.0                                        | 187.6                                         | 192.5                                           |
| 19(1)         | 1106.3                                      | 1085.3                                        | 13.9                                          | 12.3                                            |
| 20(1)         | 1009.3                                      | 987.9                                         | 0.4                                           | 0.0                                             |
| 21(1)         | 992.3                                       | 977.3                                         | 20.9                                          | 20.9                                            |
| 22(1)         | 863.2                                       | 851.9                                         | 23.1                                          | 60.8                                            |
| 23(1)         | 853.1                                       | 849.1                                         | 31.3                                          | 6.3                                             |
| 24(1)         | 790.2                                       | 778.6                                         | 28.1                                          | 21.5                                            |
| 25(1)         | 760.6                                       | 747.3                                         | 10.3                                          | 9.8                                             |
| 26(1)         | 745.3                                       | 733.5                                         | 12.1                                          | 9.6                                             |
| 27(1)         | 709.7                                       | 703.0                                         | 42.7                                          | 44.3                                            |
| 28(1)         | 653.6                                       | 644.4                                         | 1.9                                           | 0.4                                             |
| 29(1)         | 616.3                                       | 609.9                                         | 11.3                                          | 11.2                                            |
| 30(1)         | 593.7                                       | 586.0                                         | 54.3                                          | 53.2                                            |
| 31(1)         | 585.1                                       | 578.2                                         | 68.1                                          | 62.6                                            |
| 32(1)         | 530.0                                       | 525.8                                         | 4.1                                           | 3.1                                             |
| 33(1)         | 472.1                                       | 466.4                                         | 8.1                                           | 7.8                                             |
| 34(1)         | 407.1                                       | 404.5                                         | 6.5                                           | 5.5                                             |
| 35(1)         | 393.8                                       | 351.9                                         | 104.7                                         | 100.2                                           |
| 36(1)         | 356.5                                       | 353.4                                         | 2.6                                           | 2.2                                             |
| 37(1)         | 321.1                                       | 317.9                                         | 3.4                                           | 3.1                                             |

|       |        |        |     |     |
|-------|--------|--------|-----|-----|
| 38(1) | 292.7  | 290.5  | 0.0 | 0.1 |
| 39(1) | 226.1  | 222.0  | 0.4 | 0.6 |
| 40(1) | 201.7  | 197.5  | 1.1 | 1.0 |
| 41(1) | 100.2  | 99.8   | 0.5 | 0.8 |
| 42(1) | 45.8   | 39.8   | 1.7 | 1.0 |
| 1(2)  | 7622.1 | 7090.7 |     | 6.3 |
| 2(2)  | 7490.5 | 6970.6 |     | 5.8 |
| 3(2)  | 6423.1 | 6118.2 |     | 0.3 |
| 4(2)  | 6397.7 | 6091.0 |     | 0.8 |
| 5(2)  | 6364.8 | 6002.9 |     | 0.6 |
| 6(2)  | 3553.3 | 3466.1 |     | 3.2 |
| 7(2)  | 3321.2 | 3232.8 |     | 0.4 |
| 8(2)  | 3251.7 | 3168.1 |     | 1.4 |
| 9(2)  | 3084.4 | 3009.9 |     | 0.1 |
| 10(2) | 2978.9 | 2904.0 |     | 0.1 |
| 11(2) | 2766.9 | 2693.1 |     | 0.3 |
| 12(2) | 2732.7 | 2669.5 |     | 1.4 |
| 13(2) | 2690.1 | 2625.0 |     | 0.1 |
| 14(2) | 2548.8 | 2492.3 |     | 0.1 |
| 15(2) | 2425.0 | 2358.3 |     | 1.1 |
| 16(2) | 2405.6 | 2345.4 |     | 0.0 |
| 17(2) | 2372.5 | 2321.6 |     | 0.8 |
| 18(2) | 2263.9 | 2222.2 |     | 0.6 |
| 19(2) | 2212.6 | 2168.0 |     | 0.7 |
| 20(2) | 2018.6 | 1970.6 |     | 2.8 |
| 21(2) | 1984.6 | 1953.5 |     | 0.5 |
| 22(2) | 1726.5 | 1703.7 |     | 0.6 |
| 23(2) | 1706.2 | 1700.9 |     | 1.4 |
| 24(2) | 1580.4 | 1557.3 |     | 0.7 |
| 25(2) | 1521.2 | 1493.6 |     | 0.9 |
| 26(2) | 1490.7 | 1466.9 |     | 7.4 |
| 27(2) | 1419.4 | 1407.5 |     | 1.4 |
| 28(2) | 1307.2 | 1288.9 |     | 1.1 |
| 29(2) | 1232.7 | 1219.9 |     | 0.6 |
| 30(2) | 1187.3 | 1159.2 |     | 5.1 |
| 31(2) | 1170.2 | 1156.7 |     | 0.2 |
| 32(2) | 1060.0 | 1051.3 |     | 0.1 |
| 33(2) | 944.1  | 933.1  |     | 0.2 |
| 34(2) | 814.3  | 809.0  |     | 0.1 |
| 35(2) | 787.7  | 677.5  |     | 5.2 |



|       |      |        |        |     |
|-------|------|--------|--------|-----|
| 36(2) |      | 712.9  | 706.6  | 0.2 |
| 37(2) |      | 642.2  | 635.9  | 0.1 |
| 38(2) |      | 585.4  | 581.8  | 0.1 |
| 39(2) |      | 452.2  | 443.8  | 0.3 |
| 40(2) |      | 403.4  | 399.1  | 0.5 |
| 41(2) |      | 200.5  | 201.4  | 0.0 |
| 42(2) |      | 91.7   | 78.6   | 0.0 |
| 2(1)  | 1(1) | 7556.3 | 7196.0 | 0.0 |
| 3(1)  | 1(1) | 7022.6 | 6715.4 | 0.0 |
| 3(1)  | 2(1) | 6956.8 | 6654.4 | 0.0 |
| 4(1)  | 1(1) | 7009.9 | 6701.8 | 0.0 |
| 4(1)  | 2(1) | 6944.1 | 6640.9 | 0.0 |
| 4(1)  | 3(1) | 6410.4 | 6051.1 | 0.3 |
| 5(1)  | 1(1) | 6993.5 | 6684.7 | 0.0 |
| 5(1)  | 2(1) | 6927.6 | 6624.7 | 0.0 |
| 5(1)  | 3(1) | 6394.0 | 6144.0 | 0.0 |
| 5(1)  | 4(1) | 6381.3 | 6130.4 | 0.0 |
| 6(1)  | 1(1) | 5587.7 | 5370.4 | 0.0 |
| 6(1)  | 2(1) | 5521.9 | 5308.3 | 1.0 |
| 6(1)  | 3(1) | 4988.2 | 4829.2 | 0.1 |
| 6(1)  | 4(1) | 4975.5 | 4815.6 | 0.0 |
| 6(1)  | 5(1) | 4959.1 | 4799.5 | 0.0 |
| 7(1)  | 1(1) | 5471.7 | 5245.4 | 0.1 |
| 7(1)  | 2(1) | 5405.8 | 5185.3 | 0.0 |
| 7(1)  | 3(1) | 4872.2 | 4705.4 | 0.1 |
| 7(1)  | 4(1) | 4859.4 | 4694.7 | 0.0 |
| 7(1)  | 5(1) | 4843.0 | 4677.7 | 0.1 |
| 7(1)  | 6(1) | 3437.3 | 3359.5 | 0.2 |
| 8(1)  | 1(1) | 5436.9 | 5213.3 | 0.6 |
| 8(1)  | 2(1) | 5371.1 | 5153.9 | 0.0 |
| 8(1)  | 3(1) | 4837.4 | 4675.3 | 0.1 |
| 8(1)  | 4(1) | 4824.7 | 4658.7 | 0.2 |
| 8(1)  | 5(1) | 4808.3 | 4642.5 | 0.2 |
| 8(1)  | 6(1) | 3402.5 | 3327.4 | 0.1 |
| 8(1)  | 7(1) | 3286.4 | 3204.1 | 0.1 |
| 9(1)  | 1(1) | 5353.2 | 5135.3 | 0.1 |
| 9(1)  | 2(1) | 5287.4 | 5075.6 | 0.0 |
| 9(1)  | 3(1) | 4753.8 | 4600.0 | 0.0 |
| 9(1)  | 4(1) | 4741.0 | 4582.0 | 0.1 |
| 9(1)  | 5(1) | 4724.6 | 4566.9 | 0.0 |

|       |       |        |        |     |
|-------|-------|--------|--------|-----|
| 9(1)  | 6(1)  | 3318.9 | 3249.8 | 0.1 |
| 9(1)  | 7(1)  | 3202.8 | 3131.9 | 0.1 |
| 9(1)  | 8(1)  | 3168.0 | 3089.0 | 0.3 |
| 10(1) | 1(1)  | 5300.5 | 5082.1 | 0.4 |
| 10(1) | 2(1)  | 5234.7 | 5020.6 | 0.0 |
| 10(1) | 3(1)  | 4701.0 | 4543.3 | 0.1 |
| 10(1) | 4(1)  | 4688.3 | 4531.2 | 0.0 |
| 10(1) | 5(1)  | 4671.9 | 4515.0 | 0.1 |
| 10(1) | 6(1)  | 3266.1 | 3195.8 | 0.1 |
| 10(1) | 7(1)  | 3150.1 | 3055.8 | 0.3 |
| 10(1) | 8(1)  | 3115.3 | 3036.0 | 0.0 |
| 10(1) | 9(1)  | 3031.7 | 2958.9 | 0.2 |
| 11(1) | 1(1)  | 5194.5 | 4977.9 | 0.2 |
| 11(1) | 2(1)  | 5128.7 | 4905.4 | 0.8 |
| 11(1) | 3(1)  | 4595.0 | 4436.1 | 0.0 |
| 11(1) | 4(1)  | 4582.3 | 4423.1 | 0.0 |
| 11(1) | 5(1)  | 4565.9 | 4407.1 | 0.0 |
| 11(1) | 6(1)  | 3160.1 | 3088.3 | 1.0 |
| 11(1) | 7(1)  | 3044.0 | 2965.6 | 0.4 |
| 11(1) | 8(1)  | 3009.3 | 2935.2 | 0.0 |
| 11(1) | 9(1)  | 2925.6 | 2856.6 | 0.1 |
| 11(1) | 10(1) | 2872.9 | 2801.6 | 0.3 |
| 12(1) | 1(1)  | 5177.4 | 4964.8 | 0.2 |
| 12(1) | 2(1)  | 5111.6 | 4903.1 | 0.0 |
| 12(1) | 3(1)  | 4577.9 | 4425.2 | 0.0 |
| 12(1) | 4(1)  | 4565.2 | 4411.4 | 0.0 |
| 12(1) | 5(1)  | 4548.8 | 4396.0 | 0.1 |
| 12(1) | 6(1)  | 3143.0 | 3077.9 | 0.0 |
| 12(1) | 7(1)  | 3026.9 | 2942.4 | 0.2 |
| 12(1) | 8(1)  | 2992.2 | 2915.0 | 0.0 |
| 12(1) | 9(1)  | 2908.5 | 2838.9 | 1.4 |
| 12(1) | 10(1) | 2855.8 | 2785.2 | 0.7 |
| 12(1) | 11(1) | 2749.8 | 2684.9 | 0.5 |
| 13(1) | 1(1)  | 5156.1 | 4937.4 | 0.3 |
| 13(1) | 2(1)  | 5090.3 | 4880.7 | 0.1 |
| 13(1) | 3(1)  | 4556.6 | 4399.9 | 0.1 |
| 13(1) | 4(1)  | 4543.9 | 4387.3 | 0.1 |
| 13(1) | 5(1)  | 4527.4 | 4372.0 | 0.2 |
| 13(1) | 6(1)  | 3121.7 | 3056.1 | 0.1 |
| 13(1) | 7(1)  | 3005.6 | 2927.3 | 0.0 |

|       |       |        |        |     |
|-------|-------|--------|--------|-----|
| 13(1) | 8(1)  | 2970.9 | 2898.9 | 0.2 |
| 13(1) | 9(1)  | 2887.2 | 2819.0 | 0.4 |
| 13(1) | 10(1) | 2834.5 | 2764.6 | 0.4 |
| 13(1) | 11(1) | 2728.5 | 2662.5 | 0.6 |
| 13(1) | 12(1) | 2711.4 | 2648.5 | 0.8 |
| 14(1) | 1(1)  | 5085.4 | 4875.9 | 0.2 |
| 14(1) | 2(1)  | 5019.6 | 4814.2 | 0.1 |
| 14(1) | 3(1)  | 4485.9 | 4329.7 | 0.0 |
| 14(1) | 4(1)  | 4473.2 | 4317.2 | 0.1 |
| 14(1) | 5(1)  | 4456.8 | 4300.8 | 0.0 |
| 14(1) | 6(1)  | 3051.0 | 2988.7 | 0.1 |
| 14(1) | 7(1)  | 2935.0 | 2861.9 | 0.3 |
| 14(1) | 8(1)  | 2900.2 | 2830.7 | 0.0 |
| 14(1) | 9(1)  | 2816.6 | 2752.8 | 0.2 |
| 14(1) | 10(1) | 2763.8 | 2699.1 | 0.0 |
| 14(1) | 11(1) | 2657.8 | 2596.3 | 0.1 |
| 14(1) | 12(1) | 2640.7 | 2581.5 | 0.5 |
| 14(1) | 13(1) | 2619.4 | 2559.8 | 0.2 |
| 15(1) | 1(1)  | 5023.6 | 4809.5 | 0.1 |
| 15(1) | 2(1)  | 4957.8 | 4740.5 | 0.4 |
| 15(1) | 3(1)  | 4424.1 | 4266.1 | 0.0 |
| 15(1) | 4(1)  | 4411.4 | 4252.2 | 0.1 |
| 15(1) | 5(1)  | 4394.9 | 4238.0 | 0.1 |
| 15(1) | 6(1)  | 2989.2 | 2920.5 | 0.3 |
| 15(1) | 7(1)  | 2873.1 | 2796.8 | 0.1 |
| 15(1) | 8(1)  | 2838.4 | 2767.9 | 0.0 |
| 15(1) | 9(1)  | 2754.7 | 2688.2 | 0.4 |
| 15(1) | 10(1) | 2702.0 | 2633.1 | 0.0 |
| 15(1) | 11(1) | 2596.0 | 2524.2 | 0.6 |
| 15(1) | 12(1) | 2578.9 | 2515.7 | 0.1 |
| 15(1) | 13(1) | 2557.6 | 2494.3 | 0.1 |
| 15(1) | 14(1) | 2486.9 | 2428.0 | 0.3 |
| 16(1) | 1(1)  | 5013.8 | 4802.3 | 0.7 |
| 16(1) | 2(1)  | 4948.0 | 4741.9 | 0.0 |
| 16(1) | 3(1)  | 4414.4 | 4259.2 | 0.1 |
| 16(1) | 4(1)  | 4401.6 | 4246.2 | 0.0 |
| 16(1) | 5(1)  | 4385.2 | 4230.8 | 0.0 |
| 16(1) | 6(1)  | 2979.5 | 2916.3 | 0.1 |
| 16(1) | 7(1)  | 2863.4 | 2789.6 | 0.2 |
| 16(1) | 8(1)  | 2828.6 | 2757.9 | 0.0 |

|       |       |        |        |     |
|-------|-------|--------|--------|-----|
| 16(1) | 9(1)  | 2745.0 | 2680.1 | 0.5 |
| 16(1) | 10(1) | 2692.3 | 2624.7 | 0.7 |
| 16(1) | 11(1) | 2586.2 | 2523.8 | 0.0 |
| 16(1) | 12(1) | 2569.1 | 2508.0 | 1.6 |
| 16(1) | 13(1) | 2547.8 | 2484.1 | 2.0 |
| 16(1) | 14(1) | 2477.2 | 2419.5 | 0.9 |
| 16(1) | 15(1) | 2415.3 | 2355.3 | 0.3 |
| 17(1) | 1(1)  | 4997.3 | 4785.9 | 0.4 |
| 17(1) | 2(1)  | 4931.5 | 4729.6 | 0.0 |
| 17(1) | 3(1)  | 4397.8 | 4249.0 | 0.0 |
| 17(1) | 4(1)  | 4385.1 | 4235.3 | 0.0 |
| 17(1) | 5(1)  | 4368.6 | 4213.5 | 0.1 |
| 17(1) | 6(1)  | 2962.9 | 2904.3 | 0.0 |
| 17(1) | 7(1)  | 2846.8 | 2778.7 | 0.0 |
| 17(1) | 8(1)  | 2812.1 | 2744.7 | 0.3 |
| 17(1) | 9(1)  | 2728.4 | 2668.9 | 0.3 |
| 17(1) | 10(1) | 2675.7 | 2613.2 | 0.1 |
| 17(1) | 11(1) | 2569.7 | 2511.2 | 0.0 |
| 17(1) | 12(1) | 2552.6 | 2497.6 | 0.3 |
| 17(1) | 13(1) | 2531.3 | 2473.6 | 0.6 |
| 17(1) | 14(1) | 2460.6 | 2408.4 | 0.1 |
| 17(1) | 15(1) | 2398.7 | 2342.4 | 1.0 |
| 17(1) | 16(1) | 2389.0 | 2332.0 | 0.9 |
| 18(1) | 1(1)  | 4943.0 | 4739.9 | 0.0 |
| 18(1) | 2(1)  | 4877.2 | 4678.2 | 0.1 |
| 18(1) | 3(1)  | 4343.5 | 4194.2 | 0.0 |
| 18(1) | 4(1)  | 4330.8 | 4179.6 | 0.1 |
| 18(1) | 5(1)  | 4314.4 | 4167.9 | 0.1 |
| 18(1) | 6(1)  | 2908.6 | 2852.5 | 0.2 |
| 18(1) | 7(1)  | 2792.5 | 2726.0 | 0.4 |
| 18(1) | 8(1)  | 2757.8 | 2695.3 | 0.0 |
| 18(1) | 9(1)  | 2674.1 | 2618.2 | 0.1 |
| 18(1) | 10(1) | 2621.4 | 2563.0 | 0.4 |
| 18(1) | 11(1) | 2515.4 | 2457.6 | 0.4 |
| 18(1) | 12(1) | 2498.3 | 2445.6 | 0.0 |
| 18(1) | 13(1) | 2477.0 | 2424.4 | 0.1 |
| 18(1) | 14(1) | 2406.3 | 2358.1 | 0.4 |
| 18(1) | 15(1) | 2344.5 | 2290.2 | 0.1 |
| 18(1) | 16(1) | 2334.7 | 2285.8 | 0.1 |
| 18(1) | 17(1) | 2318.2 | 2273.6 | 0.5 |

|       |       |        |        |     |
|-------|-------|--------|--------|-----|
| 19(1) | 1(1)  | 4917.3 | 4713.7 | 0.0 |
| 19(1) | 2(1)  | 4851.5 | 4653.8 | 0.0 |
| 19(1) | 3(1)  | 4317.9 | 4171.5 | 0.1 |
| 19(1) | 4(1)  | 4305.1 | 4157.9 | 0.1 |
| 19(1) | 5(1)  | 4288.7 | 4142.2 | 0.1 |
| 19(1) | 6(1)  | 2883.0 | 2825.7 | 0.4 |
| 19(1) | 7(1)  | 2766.9 | 2700.7 | 0.0 |
| 19(1) | 8(1)  | 2732.1 | 2669.8 | 0.0 |
| 19(1) | 9(1)  | 2648.5 | 2592.4 | 0.1 |
| 19(1) | 10(1) | 2595.8 | 2537.5 | 0.1 |
| 19(1) | 11(1) | 2489.7 | 2430.3 | 1.0 |
| 19(1) | 12(1) | 2472.6 | 2419.5 | 0.0 |
| 19(1) | 13(1) | 2451.3 | 2398.5 | 0.6 |
| 19(1) | 14(1) | 2380.7 | 2331.8 | 0.1 |
| 19(1) | 15(1) | 2318.8 | 2264.1 | 0.6 |
| 19(1) | 16(1) | 2309.1 | 2259.2 | 0.1 |
| 19(1) | 17(1) | 2292.5 | 2247.4 | 0.3 |
| 19(1) | 18(1) | 2238.2 | 2194.5 | 0.5 |
| 20(1) | 1(1)  | 4820.3 | 4616.3 | 0.0 |
| 20(1) | 2(1)  | 4754.5 | 4555.3 | 0.0 |
| 20(1) | 3(1)  | 4220.8 | 4064.4 | 0.0 |
| 20(1) | 4(1)  | 4208.1 | 4052.1 | 0.0 |
| 20(1) | 5(1)  | 4191.7 | 4044.9 | 0.0 |
| 20(1) | 6(1)  | 2785.9 | 2730.1 | 0.0 |
| 20(1) | 7(1)  | 2669.9 | 2603.7 | 0.0 |
| 20(1) | 8(1)  | 2635.1 | 2573.0 | 0.0 |
| 20(1) | 9(1)  | 2551.5 | 2495.5 | 0.0 |
| 20(1) | 10(1) | 2498.7 | 2440.8 | 0.0 |
| 20(1) | 11(1) | 2392.7 | 2337.7 | 0.0 |
| 20(1) | 12(1) | 2375.6 | 2322.8 | 0.0 |
| 20(1) | 13(1) | 2354.3 | 2302.4 | 0.0 |
| 20(1) | 14(1) | 2283.7 | 2234.3 | 0.0 |
| 20(1) | 15(1) | 2221.8 | 2168.6 | 0.0 |
| 20(1) | 16(1) | 2212.1 | 2162.4 | 0.0 |
| 20(1) | 17(1) | 2195.5 | 2150.4 | 0.0 |
| 20(1) | 18(1) | 2141.2 | 2098.8 | 0.0 |
| 20(1) | 19(1) | 2115.6 | 2072.1 | 0.0 |
| 21(1) | 1(1)  | 4803.3 | 4605.1 | 0.0 |
| 21(1) | 2(1)  | 4737.5 | 4544.7 | 0.0 |
| 21(1) | 3(1)  | 4203.9 | 4062.8 | 0.1 |

|       |       |        |        |     |
|-------|-------|--------|--------|-----|
| 21(1) | 4(1)  | 4191.1 | 4049.2 | 0.2 |
| 21(1) | 5(1)  | 4174.7 | 4032.3 | 0.2 |
| 21(1) | 6(1)  | 2769.0 | 2719.1 | 0.0 |
| 21(1) | 7(1)  | 2652.9 | 2592.8 | 0.0 |
| 21(1) | 8(1)  | 2618.1 | 2559.8 | 0.0 |
| 21(1) | 9(1)  | 2534.5 | 2483.5 | 0.3 |
| 21(1) | 10(1) | 2481.8 | 2429.6 | 0.5 |
| 21(1) | 11(1) | 2375.7 | 2327.2 | 0.0 |
| 21(1) | 12(1) | 2358.6 | 2312.5 | 0.3 |
| 21(1) | 13(1) | 2337.3 | 2290.3 | 0.4 |
| 21(1) | 14(1) | 2266.7 | 2224.1 | 0.2 |
| 21(1) | 15(1) | 2204.8 | 2158.6 | 0.1 |
| 21(1) | 16(1) | 2195.1 | 2150.9 | 0.8 |
| 21(1) | 17(1) | 2178.5 | 2138.8 | 0.2 |
| 21(1) | 18(1) | 2124.2 | 2088.8 | 0.3 |
| 21(1) | 19(1) | 2098.6 | 2062.4 | 0.2 |
| 21(1) | 20(1) | 2001.6 | 1965.2 | 0.0 |
| 22(1) | 1(1)  | 4674.3 | 4480.0 | 0.0 |
| 22(1) | 2(1)  | 4608.5 | 4419.3 | 0.0 |
| 22(1) | 3(1)  | 4074.8 | 3933.0 | 0.0 |
| 22(1) | 4(1)  | 4062.1 | 3918.7 | 0.0 |
| 22(1) | 5(1)  | 4045.6 | 3907.7 | 0.0 |
| 22(1) | 6(1)  | 2639.9 | 2593.5 | 0.0 |
| 22(1) | 7(1)  | 2523.8 | 2468.1 | 0.0 |
| 22(1) | 8(1)  | 2489.1 | 2436.7 | 0.0 |
| 22(1) | 9(1)  | 2405.4 | 2359.2 | 0.0 |
| 22(1) | 10(1) | 2352.7 | 2305.2 | 0.0 |
| 22(1) | 11(1) | 2246.7 | 2201.2 | 0.0 |
| 22(1) | 12(1) | 2229.6 | 2188.5 | 0.0 |
| 22(1) | 13(1) | 2208.3 | 2167.0 | 0.0 |
| 22(1) | 14(1) | 2137.6 | 2099.3 | 0.0 |
| 22(1) | 15(1) | 2075.8 | 2032.7 | 0.0 |
| 22(1) | 16(1) | 2066.0 | 2025.5 | 0.0 |
| 22(1) | 17(1) | 2049.5 | 2013.3 | 0.0 |
| 22(1) | 18(1) | 1995.2 | 1964.1 | 0.0 |
| 22(1) | 19(1) | 1969.5 | 1936.8 | 0.0 |
| 22(1) | 20(1) | 1872.5 | 1837.5 | 0.7 |
| 22(1) | 21(1) | 1855.5 | 1828.5 | 0.0 |
| 23(1) | 1(1)  | 4664.1 | 4476.7 | 0.0 |
| 23(1) | 2(1)  | 4598.3 | 4416.5 | 0.0 |

|       |       |        |        |     |
|-------|-------|--------|--------|-----|
| 23(1) | 3(1)  | 4064.6 | 3935.6 | 0.0 |
| 23(1) | 4(1)  | 4051.9 | 3922.0 | 0.0 |
| 23(1) | 5(1)  | 4035.5 | 3894.7 | 0.0 |
| 23(1) | 6(1)  | 2629.7 | 2590.8 | 0.0 |
| 23(1) | 7(1)  | 2513.7 | 2465.0 | 0.0 |
| 23(1) | 8(1)  | 2478.9 | 2433.5 | 0.0 |
| 23(1) | 9(1)  | 2395.3 | 2358.3 | 0.0 |
| 23(1) | 10(1) | 2342.5 | 2301.0 | 0.0 |
| 23(1) | 11(1) | 2236.5 | 2198.5 | 0.0 |
| 23(1) | 12(1) | 2219.4 | 2184.5 | 0.0 |
| 23(1) | 13(1) | 2198.1 | 2162.8 | 0.0 |
| 23(1) | 14(1) | 2127.5 | 2096.6 | 0.0 |
| 23(1) | 15(1) | 2065.6 | 2029.5 | 0.0 |
| 23(1) | 16(1) | 2055.9 | 2022.6 | 0.0 |
| 23(1) | 17(1) | 2039.3 | 2011.7 | 0.0 |
| 23(1) | 18(1) | 1985.0 | 1960.0 | 0.0 |
| 23(1) | 19(1) | 1959.4 | 1933.7 | 0.0 |
| 23(1) | 20(1) | 1862.4 | 1837.7 | 0.4 |
| 23(1) | 21(1) | 1845.4 | 1826.1 | 0.0 |
| 23(1) | 22(1) | 1716.3 | 1702.2 | 0.2 |
| 24(1) | 1(1)  | 4601.2 | 4406.7 | 0.0 |
| 24(1) | 2(1)  | 4535.4 | 4346.0 | 0.0 |
| 24(1) | 3(1)  | 4001.8 | 3863.8 | 0.0 |
| 24(1) | 4(1)  | 3989.0 | 3850.3 | 0.0 |
| 24(1) | 5(1)  | 3972.6 | 3834.1 | 0.0 |
| 24(1) | 6(1)  | 2566.9 | 2518.3 | 0.0 |
| 24(1) | 7(1)  | 2450.8 | 2396.0 | 0.0 |
| 24(1) | 8(1)  | 2416.0 | 2364.1 | 0.0 |
| 24(1) | 9(1)  | 2332.4 | 2286.3 | 0.0 |
| 24(1) | 10(1) | 2279.7 | 2232.1 | 0.0 |
| 24(1) | 11(1) | 2173.6 | 2124.2 | 0.0 |
| 24(1) | 12(1) | 2156.5 | 2113.6 | 0.0 |
| 24(1) | 13(1) | 2135.2 | 2091.8 | 0.0 |
| 24(1) | 14(1) | 2064.6 | 2026.7 | 0.0 |
| 24(1) | 15(1) | 2002.7 | 1956.5 | 0.0 |
| 24(1) | 16(1) | 1993.0 | 1953.3 | 0.0 |
| 24(1) | 17(1) | 1976.4 | 1941.0 | 0.0 |
| 24(1) | 18(1) | 1922.1 | 1889.5 | 0.0 |
| 24(1) | 19(1) | 1896.5 | 1862.9 | 0.0 |
| 24(1) | 20(1) | 1799.5 | 1765.5 | 0.1 |

|       |       |        |        |      |
|-------|-------|--------|--------|------|
| 24(1) | 21(1) | 1782.5 | 1755.8 | 0.0  |
| 24(1) | 22(1) | 1653.4 | 1630.0 | 11.1 |
| 24(1) | 23(1) | 1643.3 | 1627.7 | 6.0  |
| 25(1) | 1(1)  | 4571.6 | 4375.6 | 0.0  |
| 25(1) | 2(1)  | 4505.8 | 4314.2 | 0.0  |
| 25(1) | 3(1)  | 3972.1 | 3833.8 | 0.0  |
| 25(1) | 4(1)  | 3959.4 | 3820.4 | 0.1  |
| 25(1) | 5(1)  | 3943.0 | 3804.4 | 0.1  |
| 25(1) | 6(1)  | 2537.2 | 2488.6 | 0.1  |
| 25(1) | 7(1)  | 2421.2 | 2363.9 | 1.1  |
| 25(1) | 8(1)  | 2386.4 | 2332.5 | 0.3  |
| 25(1) | 9(1)  | 2302.8 | 2254.8 | 0.1  |
| 25(1) | 10(1) | 2250.0 | 2200.1 | 0.1  |
| 25(1) | 11(1) | 2144.0 | 2097.1 | 0.1  |
| 25(1) | 12(1) | 2126.9 | 2079.2 | 0.3  |
| 25(1) | 13(1) | 2105.6 | 2060.4 | 0.3  |
| 25(1) | 14(1) | 2035.0 | 1993.7 | 0.4  |
| 25(1) | 15(1) | 1973.1 | 1928.3 | 0.4  |
| 25(1) | 16(1) | 1963.4 | 1921.3 | 0.6  |
| 25(1) | 17(1) | 1946.8 | 1909.9 | 0.2  |
| 25(1) | 18(1) | 1892.5 | 1858.2 | 0.7  |
| 25(1) | 19(1) | 1866.9 | 1831.2 | 0.4  |
| 25(1) | 20(1) | 1769.9 | 1734.9 | 0.0  |
| 25(1) | 21(1) | 1752.9 | 1724.3 | 0.3  |
| 25(1) | 22(1) | 1623.8 | 1599.0 | 0.0  |
| 25(1) | 23(1) | 1613.7 | 1596.2 | 0.0  |
| 25(1) | 24(1) | 1550.8 | 1525.4 | 0.0  |
| 26(1) | 1(1)  | 4556.4 | 4361.8 | 0.0  |
| 26(1) | 2(1)  | 4490.6 | 4298.5 | 0.1  |
| 26(1) | 3(1)  | 3956.9 | 3820.1 | 0.0  |
| 26(1) | 4(1)  | 3944.2 | 3806.6 | 0.1  |
| 26(1) | 5(1)  | 3927.7 | 3790.5 | 0.0  |
| 26(1) | 6(1)  | 2522.0 | 2473.6 | 0.1  |
| 26(1) | 7(1)  | 2405.9 | 2350.1 | 0.0  |
| 26(1) | 8(1)  | 2371.2 | 2318.9 | 0.1  |
| 26(1) | 9(1)  | 2287.5 | 2240.7 | 0.2  |
| 26(1) | 10(1) | 2234.8 | 2186.3 | 0.3  |
| 26(1) | 11(1) | 2128.8 | 2083.1 | 0.3  |
| 26(1) | 12(1) | 2111.7 | 2069.6 | 0.1  |
| 26(1) | 13(1) | 2090.4 | 2046.2 | 0.0  |



|       |       |        |        |     |
|-------|-------|--------|--------|-----|
| 26(1) | 14(1) | 2019.7 | 1980.6 | 0.0 |
| 26(1) | 15(1) | 1957.9 | 1913.9 | 2.3 |
| 26(1) | 16(1) | 1948.1 | 1907.5 | 0.7 |
| 26(1) | 17(1) | 1931.6 | 1896.2 | 0.2 |
| 26(1) | 18(1) | 1877.3 | 1844.1 | 0.3 |
| 26(1) | 19(1) | 1851.6 | 1818.9 | 1.1 |
| 26(1) | 20(1) | 1754.6 | 1721.1 | 0.0 |
| 26(1) | 21(1) | 1737.6 | 1710.7 | 0.0 |
| 26(1) | 22(1) | 1608.6 | 1585.0 | 0.0 |
| 26(1) | 23(1) | 1598.4 | 1582.5 | 0.0 |
| 26(1) | 24(1) | 1535.5 | 1511.4 | 0.0 |
| 26(1) | 25(1) | 1505.9 | 1480.7 | 1.4 |
| 27(1) | 1(1)  | 4520.7 | 4331.1 | 0.0 |
| 27(1) | 2(1)  | 4454.9 | 4270.7 | 0.1 |
| 27(1) | 3(1)  | 3921.3 | 3789.5 | 0.0 |
| 27(1) | 4(1)  | 3908.5 | 3775.9 | 0.0 |
| 27(1) | 5(1)  | 3892.1 | 3758.0 | 0.0 |
| 27(1) | 6(1)  | 2486.4 | 2444.2 | 0.0 |
| 27(1) | 7(1)  | 2370.3 | 2319.4 | 0.0 |
| 27(1) | 8(1)  | 2335.5 | 2288.2 | 0.0 |
| 27(1) | 9(1)  | 2251.9 | 2210.3 | 0.0 |
| 27(1) | 10(1) | 2199.2 | 2156.2 | 0.0 |
| 27(1) | 11(1) | 2093.1 | 2055.7 | 0.0 |
| 27(1) | 12(1) | 2076.0 | 2039.0 | 0.0 |
| 27(1) | 13(1) | 2054.7 | 2017.6 | 0.0 |
| 27(1) | 14(1) | 1984.1 | 1948.9 | 0.0 |
| 27(1) | 15(1) | 1922.2 | 1881.4 | 0.0 |
| 27(1) | 16(1) | 1912.5 | 1877.5 | 0.0 |
| 27(1) | 17(1) | 1895.9 | 1865.7 | 0.0 |
| 27(1) | 18(1) | 1841.6 | 1813.1 | 0.0 |
| 27(1) | 19(1) | 1816.0 | 1787.6 | 0.0 |
| 27(1) | 20(1) | 1719.0 | 1691.7 | 0.0 |
| 27(1) | 21(1) | 1702.0 | 1679.5 | 0.0 |
| 27(1) | 22(1) | 1572.9 | 1555.5 | 0.3 |
| 27(1) | 23(1) | 1562.8 | 1552.9 | 1.3 |
| 27(1) | 24(1) | 1499.9 | 1482.4 | 0.4 |
| 27(1) | 25(1) | 1470.3 | 1450.0 | 0.0 |
| 27(1) | 26(1) | 1455.0 | 1436.3 | 0.0 |
| 28(1) | 1(1)  | 4464.6 | 4272.9 | 0.0 |
| 28(1) | 2(1)  | 4398.8 | 4212.0 | 0.1 |

|       |       |        |        |      |
|-------|-------|--------|--------|------|
| 28(1) | 3(1)  | 3865.1 | 3730.4 | 0.0  |
| 28(1) | 4(1)  | 3852.4 | 3716.7 | 0.0  |
| 28(1) | 5(1)  | 3836.0 | 3701.2 | 0.0  |
| 28(1) | 6(1)  | 2430.2 | 2386.3 | 0.0  |
| 28(1) | 7(1)  | 2314.2 | 2261.1 | 0.0  |
| 28(1) | 8(1)  | 2279.4 | 2229.1 | 0.0  |
| 28(1) | 9(1)  | 2195.8 | 2153.8 | 0.0  |
| 28(1) | 10(1) | 2143.0 | 2096.8 | 0.0  |
| 28(1) | 11(1) | 2037.0 | 1996.0 | 0.0  |
| 28(1) | 12(1) | 2019.9 | 1980.6 | 0.0  |
| 28(1) | 13(1) | 1998.6 | 1958.2 | 0.0  |
| 28(1) | 14(1) | 1928.0 | 1892.0 | 0.0  |
| 28(1) | 15(1) | 1866.1 | 1824.4 | 0.0  |
| 28(1) | 16(1) | 1856.4 | 1818.6 | 0.0  |
| 28(1) | 17(1) | 1839.8 | 1808.5 | 0.0  |
| 28(1) | 18(1) | 1785.5 | 1755.5 | 0.0  |
| 28(1) | 19(1) | 1759.9 | 1728.9 | 0.0  |
| 28(1) | 20(1) | 1662.9 | 1632.6 | 0.1  |
| 28(1) | 21(1) | 1645.9 | 1620.5 | 0.0  |
| 28(1) | 22(1) | 1516.8 | 1496.0 | 1.3  |
| 28(1) | 23(1) | 1506.7 | 1493.5 | 3.9  |
| 28(1) | 24(1) | 1443.8 | 1424.0 | 0.8  |
| 28(1) | 25(1) | 1414.2 | 1391.3 | 0.0  |
| 28(1) | 26(1) | 1398.9 | 1377.6 | 0.0  |
| 28(1) | 27(1) | 1363.3 | 1344.7 | 30.3 |
| 29(1) | 1(1)  | 4427.4 | 4238.5 | 0.0  |
| 29(1) | 2(1)  | 4361.6 | 4176.9 | 0.0  |
| 29(1) | 3(1)  | 3827.9 | 3696.7 | 0.0  |
| 29(1) | 4(1)  | 3815.2 | 3683.2 | 0.0  |
| 29(1) | 5(1)  | 3798.7 | 3666.8 | 0.1  |
| 29(1) | 6(1)  | 2393.0 | 2348.9 | 0.0  |
| 29(1) | 7(1)  | 2276.9 | 2226.8 | 0.0  |
| 29(1) | 8(1)  | 2242.2 | 2195.5 | 0.0  |
| 29(1) | 9(1)  | 2158.5 | 2116.9 | 0.0  |
| 29(1) | 10(1) | 2105.8 | 2063.4 | 0.0  |
| 29(1) | 11(1) | 1999.8 | 1961.0 | 0.1  |
| 29(1) | 12(1) | 1982.7 | 1944.1 | 0.1  |
| 29(1) | 13(1) | 1961.4 | 1922.8 | 0.0  |
| 29(1) | 14(1) | 1890.7 | 1857.3 | 0.2  |
| 29(1) | 15(1) | 1828.9 | 1791.1 | 3.2  |

|       |       |        |        |      |
|-------|-------|--------|--------|------|
| 29(1) | 16(1) | 1819.1 | 1784.4 | 0.3  |
| 29(1) | 17(1) | 1802.6 | 1772.7 | 1.2  |
| 29(1) | 18(1) | 1748.3 | 1720.9 | 0.5  |
| 29(1) | 19(1) | 1722.6 | 1694.5 | 0.6  |
| 29(1) | 20(1) | 1625.6 | 1597.6 | 0.0  |
| 29(1) | 21(1) | 1608.6 | 1587.2 | 0.9  |
| 29(1) | 22(1) | 1479.6 | 1461.8 | 0.0  |
| 29(1) | 23(1) | 1469.4 | 1459.1 | 0.0  |
| 29(1) | 24(1) | 1406.5 | 1388.5 | 0.0  |
| 29(1) | 25(1) | 1376.9 | 1358.4 | 23.6 |
| 29(1) | 26(1) | 1361.7 | 1342.1 | 11.2 |
| 29(1) | 27(1) | 1326.0 | 1312.9 | 0.0  |
| 29(1) | 28(1) | 1269.9 | 1254.1 | 0.0  |
| 30(1) | 1(1)  | 4404.7 | 4214.3 | 0.0  |
| 30(1) | 2(1)  | 4338.9 | 4153.4 | 0.9  |
| 30(1) | 3(1)  | 3805.2 | 3672.9 | 0.0  |
| 30(1) | 4(1)  | 3792.5 | 3659.3 | 0.0  |
| 30(1) | 5(1)  | 3776.1 | 3643.0 | 0.0  |
| 30(1) | 6(1)  | 2370.3 | 2327.8 | 0.0  |
| 30(1) | 7(1)  | 2254.2 | 2203.4 | 0.0  |
| 30(1) | 8(1)  | 2219.5 | 2172.2 | 0.0  |
| 30(1) | 9(1)  | 2135.8 | 2094.2 | 0.0  |
| 30(1) | 10(1) | 2083.1 | 2039.8 | 0.0  |
| 30(1) | 11(1) | 1977.1 | 1939.8 | 0.0  |
| 30(1) | 12(1) | 1960.0 | 1921.1 | 0.0  |
| 30(1) | 13(1) | 1938.7 | 1900.4 | 0.0  |
| 30(1) | 14(1) | 1868.0 | 1832.4 | 0.0  |
| 30(1) | 15(1) | 1806.2 | 1769.7 | 0.0  |
| 30(1) | 16(1) | 1796.4 | 1760.8 | 0.0  |
| 30(1) | 17(1) | 1779.9 | 1748.6 | 0.0  |
| 30(1) | 18(1) | 1725.6 | 1696.9 | 0.0  |
| 30(1) | 19(1) | 1699.9 | 1669.4 | 0.0  |
| 30(1) | 20(1) | 1602.9 | 1574.4 | 0.1  |
| 30(1) | 21(1) | 1585.9 | 1563.5 | 0.0  |
| 30(1) | 22(1) | 1456.9 | 1438.7 | 0.3  |
| 30(1) | 23(1) | 1446.7 | 1435.8 | 0.6  |
| 30(1) | 24(1) | 1383.8 | 1378.8 | 7.2  |
| 30(1) | 25(1) | 1354.2 | 1333.3 | 0.0  |
| 30(1) | 26(1) | 1339.0 | 1320.1 | 0.0  |
| 30(1) | 27(1) | 1303.3 | 1282.7 | 70.9 |

|       |       |        |        |      |
|-------|-------|--------|--------|------|
| 30(1) | 28(1) | 1247.2 | 1227.4 | 4.6  |
| 30(1) | 29(1) | 1210.0 | 1195.7 | 0.0  |
| 31(1) | 1(1)  | 4396.2 | 4206.7 | 0.0  |
| 31(1) | 2(1)  | 4330.3 | 4144.9 | 0.1  |
| 31(1) | 3(1)  | 3796.7 | 3665.4 | 0.1  |
| 31(1) | 4(1)  | 3784.0 | 3651.7 | 0.0  |
| 31(1) | 5(1)  | 3767.5 | 3635.6 | 0.0  |
| 31(1) | 6(1)  | 2361.8 | 2319.3 | 0.0  |
| 31(1) | 7(1)  | 2245.7 | 2195.0 | 0.0  |
| 31(1) | 8(1)  | 2211.0 | 2163.6 | 0.0  |
| 31(1) | 9(1)  | 2127.3 | 2085.7 | 0.1  |
| 31(1) | 10(1) | 2074.6 | 2031.7 | 0.1  |
| 31(1) | 11(1) | 1968.6 | 1927.1 | 0.2  |
| 31(1) | 12(1) | 1951.5 | 1913.8 | 0.3  |
| 31(1) | 13(1) | 1930.1 | 1891.9 | 0.0  |
| 31(1) | 14(1) | 1859.5 | 1825.6 | 0.1  |
| 31(1) | 15(1) | 1797.6 | 1759.8 | 3.0  |
| 31(1) | 16(1) | 1787.9 | 1753.3 | 1.1  |
| 31(1) | 17(1) | 1771.3 | 1741.1 | 2.5  |
| 31(1) | 18(1) | 1717.1 | 1690.0 | 0.4  |
| 31(1) | 19(1) | 1691.4 | 1663.2 | 3.5  |
| 31(1) | 20(1) | 1594.4 | 1566.2 | 0.0  |
| 31(1) | 21(1) | 1577.4 | 1555.4 | 0.9  |
| 31(1) | 22(1) | 1448.3 | 1430.3 | 0.0  |
| 31(1) | 23(1) | 1438.2 | 1427.5 | 0.0  |
| 31(1) | 24(1) | 1375.3 | 1356.9 | 0.0  |
| 31(1) | 25(1) | 1345.7 | 1325.8 | 26.7 |
| 31(1) | 26(1) | 1330.5 | 1311.5 | 1.2  |
| 31(1) | 27(1) | 1294.8 | 1281.6 | 0.0  |
| 31(1) | 28(1) | 1238.7 | 1223.0 | 0.0  |
| 31(1) | 29(1) | 1201.5 | 1188.0 | 77.6 |
| 31(1) | 30(1) | 1178.8 | 1165.0 | 0.0  |
| 32(1) | 1(1)  | 4341.0 | 4154.1 | 0.0  |
| 32(1) | 2(1)  | 4275.2 | 4093.2 | 0.0  |
| 32(1) | 3(1)  | 3741.6 | 3612.6 | 0.0  |
| 32(1) | 4(1)  | 3728.8 | 3599.1 | 0.0  |
| 32(1) | 5(1)  | 3712.4 | 3583.0 | 0.1  |
| 32(1) | 6(1)  | 2306.7 | 2267.5 | 0.0  |
| 32(1) | 7(1)  | 2190.6 | 2141.8 | 0.4  |
| 32(1) | 8(1)  | 2155.8 | 2110.2 | 0.1  |

|       |       |        |        |     |
|-------|-------|--------|--------|-----|
| 32(1) | 9(1)  | 2072.2 | 2033.2 | 0.0 |
| 32(1) | 10(1) | 2019.5 | 1978.0 | 0.0 |
| 32(1) | 11(1) | 1913.4 | 1875.7 | 0.1 |
| 32(1) | 12(1) | 1896.3 | 1860.8 | 0.2 |
| 32(1) | 13(1) | 1875.0 | 1839.4 | 0.0 |
| 32(1) | 14(1) | 1804.4 | 1772.9 | 0.3 |
| 32(1) | 15(1) | 1742.5 | 1707.2 | 0.2 |
| 32(1) | 16(1) | 1732.8 | 1699.6 | 0.4 |
| 32(1) | 17(1) | 1716.2 | 1688.6 | 1.5 |
| 32(1) | 18(1) | 1661.9 | 1638.5 | 0.9 |
| 32(1) | 19(1) | 1636.3 | 1611.7 | 9.1 |
| 32(1) | 20(1) | 1539.3 | 1513.7 | 0.0 |
| 32(1) | 21(1) | 1522.3 | 1503.4 | 3.7 |
| 32(1) | 22(1) | 1393.2 | 1377.6 | 0.0 |
| 32(1) | 23(1) | 1383.1 | 1374.8 | 0.0 |
| 32(1) | 24(1) | 1320.2 | 1304.3 | 0.0 |
| 32(1) | 25(1) | 1290.6 | 1273.2 | 0.8 |
| 32(1) | 26(1) | 1275.3 | 1259.4 | 0.1 |
| 32(1) | 27(1) | 1239.7 | 1228.8 | 0.0 |
| 32(1) | 28(1) | 1183.6 | 1170.0 | 0.0 |
| 32(1) | 29(1) | 1146.3 | 1135.7 | 2.5 |
| 32(1) | 30(1) | 1123.6 | 1112.0 | 0.0 |
| 32(1) | 31(1) | 1115.1 | 1104.2 | 0.0 |
| 33(1) | 1(1)  | 4283.1 | 4094.9 | 0.0 |
| 33(1) | 2(1)  | 4217.3 | 4033.8 | 0.0 |
| 33(1) | 3(1)  | 3683.6 | 3552.7 | 0.0 |
| 33(1) | 4(1)  | 3670.9 | 3539.2 | 0.0 |
| 33(1) | 5(1)  | 3654.5 | 3523.4 | 0.0 |
| 33(1) | 6(1)  | 2248.7 | 2208.2 | 0.0 |
| 33(1) | 7(1)  | 2132.7 | 2083.0 | 0.0 |
| 33(1) | 8(1)  | 2097.9 | 2051.7 | 0.0 |
| 33(1) | 9(1)  | 2014.2 | 1973.9 | 0.0 |
| 33(1) | 10(1) | 1961.5 | 1920.1 | 0.0 |
| 33(1) | 11(1) | 1855.5 | 1816.5 | 0.0 |
| 33(1) | 12(1) | 1838.4 | 1801.4 | 0.0 |
| 33(1) | 13(1) | 1817.1 | 1781.3 | 0.0 |
| 33(1) | 14(1) | 1746.4 | 1713.8 | 0.0 |
| 33(1) | 15(1) | 1684.6 | 1647.5 | 0.0 |
| 33(1) | 16(1) | 1674.8 | 1640.7 | 0.0 |
| 33(1) | 17(1) | 1658.3 | 1629.4 | 0.0 |

|       |       |        |        |      |
|-------|-------|--------|--------|------|
| 33(1) | 18(1) | 1604.0 | 1576.7 | 0.0  |
| 33(1) | 19(1) | 1578.3 | 1551.1 | 0.0  |
| 33(1) | 20(1) | 1481.3 | 1448.5 | 0.4  |
| 33(1) | 21(1) | 1464.3 | 1443.6 | 0.0  |
| 33(1) | 22(1) | 1335.3 | 1316.8 | 3.2  |
| 33(1) | 23(1) | 1325.1 | 1315.3 | 1.4  |
| 33(1) | 24(1) | 1262.2 | 1243.6 | 6.5  |
| 33(1) | 25(1) | 1232.6 | 1213.0 | 0.0  |
| 33(1) | 26(1) | 1217.4 | 1199.0 | 0.0  |
| 33(1) | 27(1) | 1181.7 | 1169.9 | 18.9 |
| 33(1) | 28(1) | 1125.6 | 1105.9 | 2.7  |
| 33(1) | 29(1) | 1088.4 | 1076.5 | 0.0  |
| 33(1) | 30(1) | 1065.7 | 1052.3 | 0.1  |
| 33(1) | 31(1) | 1057.2 | 1044.8 | 0.0  |
| 33(1) | 32(1) | 1002.0 | 992.5  | 0.0  |
| 34(1) | 1(1)  | 4218.2 | 4032.9 | 0.0  |
| 34(1) | 2(1)  | 4152.4 | 3971.6 | 0.0  |
| 34(1) | 3(1)  | 3618.7 | 3491.4 | 0.0  |
| 34(1) | 4(1)  | 3606.0 | 3477.9 | 0.0  |
| 34(1) | 5(1)  | 3589.5 | 3461.6 | 0.0  |
| 34(1) | 6(1)  | 2183.8 | 2145.6 | 0.0  |
| 34(1) | 7(1)  | 2067.7 | 2020.8 | 0.0  |
| 34(1) | 8(1)  | 2033.0 | 1991.7 | 0.0  |
| 34(1) | 9(1)  | 1949.3 | 1912.3 | 0.1  |
| 34(1) | 10(1) | 1896.6 | 1857.9 | 0.3  |
| 34(1) | 11(1) | 1790.6 | 1753.8 | 3.0  |
| 34(1) | 12(1) | 1773.5 | 1741.0 | 1.1  |
| 34(1) | 13(1) | 1752.2 | 1718.3 | 0.8  |
| 34(1) | 14(1) | 1681.5 | 1651.9 | 0.0  |
| 34(1) | 15(1) | 1619.7 | 1584.7 | 9.9  |
| 34(1) | 16(1) | 1609.9 | 1578.5 | 1.0  |
| 34(1) | 17(1) | 1593.4 | 1567.6 | 1.9  |
| 34(1) | 18(1) | 1539.1 | 1515.8 | 1.4  |
| 34(1) | 19(1) | 1513.4 | 1489.4 | 0.6  |
| 34(1) | 20(1) | 1416.4 | 1392.3 | 0.0  |
| 34(1) | 21(1) | 1399.4 | 1381.7 | 0.4  |
| 34(1) | 22(1) | 1270.4 | 1256.4 | 0.0  |
| 34(1) | 23(1) | 1260.2 | 1253.8 | 0.0  |
| 34(1) | 24(1) | 1197.3 | 1183.0 | 0.0  |
| 34(1) | 25(1) | 1167.7 | 1150.3 | 1.6  |

|       |       |        |        |     |
|-------|-------|--------|--------|-----|
| 34(1) | 26(1) | 1152.5 | 1137.8 | 1.8 |
| 34(1) | 27(1) | 1116.8 | 1107.7 | 0.0 |
| 34(1) | 28(1) | 1060.7 | 1048.9 | 0.0 |
| 34(1) | 29(1) | 1023.5 | 1014.7 | 0.2 |
| 34(1) | 30(1) | 1000.8 | 990.9  | 0.0 |
| 34(1) | 31(1) | 992.2  | 982.8  | 0.0 |
| 34(1) | 32(1) | 937.1  | 930.3  | 0.1 |
| 34(1) | 33(1) | 879.2  | 871.1  | 0.0 |
| 35(1) | 1(1)  | 4204.9 | 3973.4 | 1.3 |
| 35(1) | 2(1)  | 4139.1 | 3919.1 | 0.0 |
| 35(1) | 3(1)  | 3605.4 | 3438.8 | 0.0 |
| 35(1) | 4(1)  | 3592.7 | 3425.2 | 0.0 |
| 35(1) | 5(1)  | 3576.3 | 3412.0 | 0.0 |
| 35(1) | 6(1)  | 2170.5 | 2093.9 | 0.0 |
| 35(1) | 7(1)  | 2054.4 | 1968.9 | 0.0 |
| 35(1) | 8(1)  | 2019.7 | 1936.5 | 0.0 |
| 35(1) | 9(1)  | 1936.0 | 1859.2 | 0.0 |
| 35(1) | 10(1) | 1883.3 | 1802.7 | 0.0 |
| 35(1) | 11(1) | 1777.3 | 1701.5 | 0.0 |
| 35(1) | 12(1) | 1760.2 | 1685.1 | 0.0 |
| 35(1) | 13(1) | 1738.9 | 1668.0 | 0.0 |
| 35(1) | 14(1) | 1668.2 | 1598.7 | 0.0 |
| 35(1) | 15(1) | 1606.4 | 1532.4 | 0.0 |
| 35(1) | 16(1) | 1596.6 | 1522.6 | 0.1 |
| 35(1) | 17(1) | 1580.1 | 1518.9 | 0.0 |
| 35(1) | 18(1) | 1525.8 | 1463.6 | 0.0 |
| 35(1) | 19(1) | 1500.1 | 1437.4 | 0.0 |
| 35(1) | 20(1) | 1403.1 | 1339.4 | 0.1 |
| 35(1) | 21(1) | 1386.1 | 1329.1 | 0.0 |
| 35(1) | 22(1) | 1257.1 | 1206.2 | 1.0 |
| 35(1) | 23(1) | 1246.9 | 1206.2 | 2.1 |
| 35(1) | 24(1) | 1184.0 | 1130.6 | 0.6 |
| 35(1) | 25(1) | 1154.4 | 1095.7 | 0.0 |
| 35(1) | 26(1) | 1139.2 | 1083.4 | 0.0 |
| 35(1) | 27(1) | 1103.5 | 1055.1 | 0.5 |
| 35(1) | 28(1) | 1047.4 | 992.1  | 3.8 |
| 35(1) | 29(1) | 1010.2 | 960.7  | 0.1 |
| 35(1) | 30(1) | 987.5  | 937.9  | 0.2 |
| 35(1) | 31(1) | 979.0  | 929.9  | 0.0 |
| 35(1) | 32(1) | 923.8  | 876.9  | 0.0 |

|       |       |        |        |     |
|-------|-------|--------|--------|-----|
| 35(1) | 33(1) | 865.9  | 818.3  | 0.0 |
| 35(1) | 34(1) | 801.0  | 755.2  | 0.5 |
| 36(1) | 1(1)  | 4167.5 | 3981.9 | 0.0 |
| 36(1) | 2(1)  | 4101.7 | 3920.8 | 0.0 |
| 36(1) | 3(1)  | 3568.0 | 3440.3 | 0.0 |
| 36(1) | 4(1)  | 3555.3 | 3426.8 | 0.0 |
| 36(1) | 5(1)  | 3538.9 | 3410.5 | 0.0 |
| 36(1) | 6(1)  | 2133.1 | 2095.6 | 0.2 |
| 36(1) | 7(1)  | 2017.1 | 1970.8 | 0.3 |
| 36(1) | 8(1)  | 1982.3 | 1939.2 | 0.0 |
| 36(1) | 9(1)  | 1898.6 | 1861.0 | 0.1 |
| 36(1) | 10(1) | 1845.9 | 1806.8 | 0.3 |
| 36(1) | 11(1) | 1739.9 | 1702.1 | 0.8 |
| 36(1) | 12(1) | 1722.8 | 1689.2 | 0.4 |
| 36(1) | 13(1) | 1701.5 | 1667.5 | 0.6 |
| 36(1) | 14(1) | 1630.8 | 1600.9 | 3.1 |
| 36(1) | 15(1) | 1569.0 | 1535.1 | 0.1 |
| 36(1) | 16(1) | 1559.2 | 1527.9 | 0.8 |
| 36(1) | 17(1) | 1542.7 | 1516.3 | 0.2 |
| 36(1) | 18(1) | 1488.4 | 1465.2 | 0.3 |
| 36(1) | 19(1) | 1462.8 | 1439.0 | 0.5 |
| 36(1) | 20(1) | 1365.7 | 1341.2 | 0.0 |
| 36(1) | 21(1) | 1348.8 | 1330.9 | 0.6 |
| 36(1) | 22(1) | 1219.7 | 1205.1 | 0.0 |
| 36(1) | 23(1) | 1209.5 | 1202.7 | 0.0 |
| 36(1) | 24(1) | 1146.6 | 1131.7 | 0.0 |
| 36(1) | 25(1) | 1117.0 | 1100.0 | 4.1 |
| 36(1) | 26(1) | 1101.8 | 1085.0 | 3.1 |
| 36(1) | 27(1) | 1066.1 | 1056.6 | 0.0 |
| 36(1) | 28(1) | 1010.0 | 998.0  | 0.1 |
| 36(1) | 29(1) | 972.8  | 963.2  | 0.1 |
| 36(1) | 30(1) | 950.1  | 939.8  | 0.0 |
| 36(1) | 31(1) | 941.6  | 931.7  | 0.0 |
| 36(1) | 32(1) | 886.4  | 879.0  | 0.0 |
| 36(1) | 33(1) | 828.5  | 819.7  | 0.0 |
| 36(1) | 34(1) | 763.6  | 759.0  | 3.1 |
| 36(1) | 35(1) | 750.3  | 704.4  | 0.0 |
| 37(1) | 1(1)  | 4132.2 | 3946.2 | 0.0 |
| 37(1) | 2(1)  | 4066.3 | 3885.3 | 0.0 |
| 37(1) | 3(1)  | 3532.7 | 3405.0 | 0.0 |



|       |       |        |        |      |
|-------|-------|--------|--------|------|
| 37(1) | 4(1)  | 3520.0 | 3391.4 | 0.0  |
| 37(1) | 5(1)  | 3503.5 | 3375.1 | 0.0  |
| 37(1) | 6(1)  | 2097.8 | 2059.5 | 0.0  |
| 37(1) | 7(1)  | 1981.7 | 1933.7 | 0.0  |
| 37(1) | 8(1)  | 1947.0 | 1903.0 | 0.0  |
| 37(1) | 9(1)  | 1863.3 | 1826.8 | 0.3  |
| 37(1) | 10(1) | 1810.6 | 1771.1 | 0.0  |
| 37(1) | 11(1) | 1704.6 | 1667.9 | 0.1  |
| 37(1) | 12(1) | 1687.5 | 1656.5 | 27.0 |
| 37(1) | 13(1) | 1666.1 | 1631.9 | 3.4  |
| 37(1) | 14(1) | 1595.5 | 1565.1 | 0.2  |
| 37(1) | 15(1) | 1533.6 | 1499.3 | 3.9  |
| 37(1) | 16(1) | 1523.9 | 1491.8 | 0.6  |
| 37(1) | 17(1) | 1507.3 | 1480.8 | 0.4  |
| 37(1) | 18(1) | 1453.1 | 1429.5 | 0.5  |
| 37(1) | 19(1) | 1427.4 | 1403.1 | 0.1  |
| 37(1) | 20(1) | 1330.4 | 1306.0 | 0.0  |
| 37(1) | 21(1) | 1313.4 | 1294.6 | 0.7  |
| 37(1) | 22(1) | 1184.3 | 1169.9 | 0.0  |
| 37(1) | 23(1) | 1174.2 | 1167.3 | 0.0  |
| 37(1) | 24(1) | 1111.3 | 1096.4 | 0.0  |
| 37(1) | 25(1) | 1081.7 | 1065.1 | 0.0  |
| 37(1) | 26(1) | 1066.5 | 1051.1 | 0.3  |
| 37(1) | 27(1) | 1030.8 | 1021.1 | 0.0  |
| 37(1) | 28(1) | 974.7  | 962.3  | 0.0  |
| 37(1) | 29(1) | 937.5  | 927.7  | 0.0  |
| 37(1) | 30(1) | 914.8  | 904.5  | 0.0  |
| 37(1) | 31(1) | 906.2  | 896.4  | 0.0  |
| 37(1) | 32(1) | 851.1  | 844.8  | 0.0  |
| 37(1) | 33(1) | 793.2  | 784.3  | 0.0  |
| 37(1) | 34(1) | 728.2  | 722.4  | 0.2  |
| 37(1) | 35(1) | 715.0  | 669.0  | 0.6  |
| 37(1) | 36(1) | 677.6  | 670.9  | 0.0  |
| 38(1) | 1(1)  | 4103.7 | 3918.6 | 0.0  |
| 38(1) | 2(1)  | 4037.9 | 3858.2 | 0.1  |
| 38(1) | 3(1)  | 3504.3 | 3377.4 | 0.0  |
| 38(1) | 4(1)  | 3491.5 | 3363.8 | 0.0  |
| 38(1) | 5(1)  | 3475.1 | 3347.7 | 0.0  |
| 38(1) | 6(1)  | 2069.4 | 2032.0 | 0.0  |
| 38(1) | 7(1)  | 1953.3 | 1907.7 | 0.0  |

|       |       |        |        |     |
|-------|-------|--------|--------|-----|
| 38(1) | 8(1)  | 1918.5 | 1876.5 | 0.0 |
| 38(1) | 9(1)  | 1834.9 | 1798.5 | 0.0 |
| 38(1) | 10(1) | 1782.2 | 1744.1 | 0.0 |
| 38(1) | 11(1) | 1676.1 | 1640.3 | 0.0 |
| 38(1) | 12(1) | 1659.0 | 1626.4 | 0.0 |
| 38(1) | 13(1) | 1637.7 | 1605.0 | 0.0 |
| 38(1) | 14(1) | 1567.1 | 1536.6 | 0.0 |
| 38(1) | 15(1) | 1505.2 | 1471.8 | 0.0 |
| 38(1) | 16(1) | 1495.5 | 1465.2 | 0.1 |
| 38(1) | 17(1) | 1478.9 | 1453.4 | 0.0 |
| 38(1) | 18(1) | 1424.6 | 1401.6 | 0.0 |
| 38(1) | 19(1) | 1399.0 | 1376.1 | 0.0 |
| 38(1) | 20(1) | 1302.0 | 1279.5 | 3.0 |
| 38(1) | 21(1) | 1285.0 | 1267.6 | 0.0 |
| 38(1) | 22(1) | 1155.9 | 1141.9 | 0.1 |
| 38(1) | 23(1) | 1145.8 | 1139.5 | 3.5 |
| 38(1) | 24(1) | 1082.9 | 1068.3 | 2.4 |
| 38(1) | 25(1) | 1053.3 | 1037.8 | 0.0 |
| 38(1) | 26(1) | 1038.0 | 1023.1 | 0.0 |
| 38(1) | 27(1) | 1002.4 | 993.7  | 0.3 |
| 38(1) | 28(1) | 946.3  | 935.2  | 0.1 |
| 38(1) | 29(1) | 909.0  | 900.4  | 0.0 |
| 38(1) | 30(1) | 886.3  | 877.4  | 0.1 |
| 38(1) | 31(1) | 877.8  | 869.2  | 0.1 |
| 38(1) | 32(1) | 822.7  | 815.8  | 0.1 |
| 38(1) | 33(1) | 764.8  | 758.0  | 0.9 |
| 38(1) | 34(1) | 699.8  | 696.6  | 0.0 |
| 38(1) | 35(1) | 686.5  | 642.7  | 0.4 |
| 38(1) | 36(1) | 649.2  | 644.4  | 0.0 |
| 38(1) | 37(1) | 613.8  | 608.2  | 0.0 |
| 39(1) | 1(1)  | 4037.1 | 3850.2 | 0.0 |
| 39(1) | 2(1)  | 3971.3 | 3789.6 | 0.0 |
| 39(1) | 3(1)  | 3437.7 | 3308.9 | 0.0 |
| 39(1) | 4(1)  | 3424.9 | 3295.3 | 0.0 |
| 39(1) | 5(1)  | 3408.5 | 3279.0 | 0.0 |
| 39(1) | 6(1)  | 2002.8 | 1963.8 | 0.0 |
| 39(1) | 7(1)  | 1886.7 | 1839.2 | 0.0 |
| 39(1) | 8(1)  | 1851.9 | 1808.0 | 0.0 |
| 39(1) | 9(1)  | 1768.3 | 1730.0 | 0.0 |
| 39(1) | 10(1) | 1715.6 | 1675.6 | 0.1 |

|       |       |        |        |     |
|-------|-------|--------|--------|-----|
| 39(1) | 11(1) | 1609.5 | 1571.9 | 0.0 |
| 39(1) | 12(1) | 1592.4 | 1557.5 | 0.0 |
| 39(1) | 13(1) | 1571.1 | 1536.0 | 0.1 |
| 39(1) | 14(1) | 1500.5 | 1469.2 | 0.0 |
| 39(1) | 15(1) | 1438.6 | 1403.3 | 0.0 |
| 39(1) | 16(1) | 1428.9 | 1396.1 | 0.0 |
| 39(1) | 17(1) | 1412.3 | 1384.5 | 0.1 |
| 39(1) | 18(1) | 1358.0 | 1333.5 | 0.0 |
| 39(1) | 19(1) | 1332.4 | 1307.3 | 0.0 |
| 39(1) | 20(1) | 1235.4 | 1209.9 | 0.2 |
| 39(1) | 21(1) | 1218.4 | 1199.2 | 0.0 |
| 39(1) | 22(1) | 1089.3 | 1073.6 | 0.1 |
| 39(1) | 23(1) | 1079.2 | 1071.7 | 0.1 |
| 39(1) | 24(1) | 1016.3 | 1000.6 | 0.0 |
| 39(1) | 25(1) | 986.7  | 969.3  | 0.0 |
| 39(1) | 26(1) | 971.4  | 955.7  | 0.0 |
| 39(1) | 27(1) | 935.8  | 925.4  | 0.1 |
| 39(1) | 28(1) | 879.7  | 866.1  | 0.0 |
| 39(1) | 29(1) | 842.4  | 831.9  | 0.2 |
| 39(1) | 30(1) | 819.7  | 808.5  | 0.0 |
| 39(1) | 31(1) | 811.2  | 800.9  | 0.0 |
| 39(1) | 32(1) | 756.1  | 749.0  | 0.0 |
| 39(1) | 33(1) | 698.1  | 688.1  | 0.0 |
| 39(1) | 34(1) | 633.2  | 626.0  | 0.0 |
| 39(1) | 35(1) | 619.9  | 572.0  | 0.7 |
| 39(1) | 36(1) | 582.5  | 575.2  | 0.8 |
| 39(1) | 37(1) | 547.2  | 539.3  | 0.0 |
| 39(1) | 38(1) | 518.8  | 512.2  | 0.5 |
| 40(1) | 1(1)  | 4012.8 | 3827.8 | 0.0 |
| 40(1) | 2(1)  | 3946.9 | 3766.9 | 0.0 |
| 40(1) | 3(1)  | 3413.3 | 3286.6 | 0.0 |
| 40(1) | 4(1)  | 3400.6 | 3273.0 | 0.0 |
| 40(1) | 5(1)  | 3384.1 | 3256.6 | 0.0 |
| 40(1) | 6(1)  | 1978.4 | 1940.7 | 0.4 |
| 40(1) | 7(1)  | 1862.3 | 1817.0 | 0.0 |
| 40(1) | 8(1)  | 1827.6 | 1785.6 | 0.3 |
| 40(1) | 9(1)  | 1743.9 | 1707.5 | 1.0 |
| 40(1) | 10(1) | 1691.2 | 1653.2 | 3.8 |
| 40(1) | 11(1) | 1585.2 | 1548.7 | 1.4 |
| 40(1) | 12(1) | 1568.1 | 1534.9 | 1.6 |

|       |       |        |        |      |
|-------|-------|--------|--------|------|
| 40(1) | 13(1) | 1546.7 | 1513.6 | 0.0  |
| 40(1) | 14(1) | 1476.1 | 1446.6 | 0.2  |
| 40(1) | 15(1) | 1414.2 | 1380.7 | 1.3  |
| 40(1) | 16(1) | 1404.5 | 1374.7 | 0.0  |
| 40(1) | 17(1) | 1387.9 | 1362.0 | 1.6  |
| 40(1) | 18(1) | 1333.7 | 1310.9 | 0.2  |
| 40(1) | 19(1) | 1308.0 | 1284.4 | 0.2  |
| 40(1) | 20(1) | 1211.0 | 1187.8 | 0.0  |
| 40(1) | 21(1) | 1194.0 | 1176.6 | 15.7 |
| 40(1) | 22(1) | 1064.9 | 1051.4 | 0.0  |
| 40(1) | 23(1) | 1054.8 | 1048.9 | 0.0  |
| 40(1) | 24(1) | 991.9  | 978.0  | 0.0  |
| 40(1) | 25(1) | 962.3  | 946.2  | 0.0  |
| 40(1) | 26(1) | 947.0  | 932.7  | 0.1  |
| 40(1) | 27(1) | 911.4  | 903.2  | 0.0  |
| 40(1) | 28(1) | 855.3  | 844.1  | 0.1  |
| 40(1) | 29(1) | 818.0  | 809.7  | 0.1  |
| 40(1) | 30(1) | 795.4  | 786.5  | 0.0  |
| 40(1) | 31(1) | 786.8  | 778.0  | 0.1  |
| 40(1) | 32(1) | 731.7  | 725.9  | 0.0  |
| 40(1) | 33(1) | 673.8  | 665.8  | 0.1  |
| 40(1) | 34(1) | 608.8  | 604.0  | 0.3  |
| 40(1) | 35(1) | 595.6  | 550.9  | 0.0  |
| 40(1) | 36(1) | 558.2  | 552.6  | 0.0  |
| 40(1) | 37(1) | 522.8  | 516.0  | 0.8  |
| 40(1) | 38(1) | 494.4  | 490.5  | 0.0  |
| 40(1) | 39(1) | 427.8  | 421.0  | 0.0  |
| 41(1) | 1(1)  | 3911.3 | 3728.3 | 0.1  |
| 41(1) | 2(1)  | 3845.5 | 3668.0 | 0.1  |
| 41(1) | 3(1)  | 3311.8 | 3186.8 | 0.0  |
| 41(1) | 4(1)  | 3299.1 | 3173.2 | 0.0  |
| 41(1) | 5(1)  | 3282.6 | 3157.1 | 0.0  |
| 41(1) | 6(1)  | 1876.9 | 1841.0 | 0.1  |
| 41(1) | 7(1)  | 1760.8 | 1717.3 | 0.1  |
| 41(1) | 8(1)  | 1726.1 | 1686.1 | 0.0  |
| 41(1) | 9(1)  | 1642.4 | 1608.0 | 0.1  |
| 41(1) | 10(1) | 1589.7 | 1553.6 | 0.0  |
| 41(1) | 11(1) | 1483.7 | 1449.6 | 0.0  |
| 41(1) | 12(1) | 1466.6 | 1435.8 | 0.0  |
| 41(1) | 13(1) | 1445.3 | 1414.2 | 0.0  |

|       |       |        |        |     |
|-------|-------|--------|--------|-----|
| 41(1) | 14(1) | 1374.6 | 1347.2 | 0.0 |
| 41(1) | 15(1) | 1312.8 | 1281.3 | 0.0 |
| 41(1) | 16(1) | 1303.0 | 1274.4 | 0.2 |
| 41(1) | 17(1) | 1286.5 | 1262.5 | 0.0 |
| 41(1) | 18(1) | 1232.2 | 1211.6 | 0.0 |
| 41(1) | 19(1) | 1206.5 | 1184.7 | 0.0 |
| 41(1) | 20(1) | 1109.5 | 1088.3 | 6.3 |
| 41(1) | 21(1) | 1092.5 | 1077.1 | 0.0 |
| 41(1) | 22(1) | 963.5  | 951.8  | 0.3 |
| 41(1) | 23(1) | 953.3  | 949.3  | 0.0 |
| 41(1) | 24(1) | 890.4  | 878.4  | 0.2 |
| 41(1) | 25(1) | 860.8  | 846.8  | 2.0 |
| 41(1) | 26(1) | 845.6  | 833.8  | 0.0 |
| 41(1) | 27(1) | 809.9  | 803.4  | 0.0 |
| 41(1) | 28(1) | 753.8  | 744.5  | 0.1 |
| 41(1) | 29(1) | 716.6  | 710.5  | 0.9 |
| 41(1) | 30(1) | 693.9  | 688.0  | 0.1 |
| 41(1) | 31(1) | 685.3  | 678.5  | 0.0 |
| 41(1) | 32(1) | 630.2  | 625.6  | 0.0 |
| 41(1) | 33(1) | 572.3  | 565.9  | 1.5 |
| 41(1) | 34(1) | 507.4  | 504.9  | 0.0 |
| 41(1) | 35(1) | 494.1  | 451.4  | 0.3 |
| 41(1) | 36(1) | 456.7  | 453.3  | 0.0 |
| 41(1) | 37(1) | 421.3  | 417.9  | 0.0 |
| 41(1) | 38(1) | 392.9  | 389.6  | 0.5 |
| 41(1) | 39(1) | 326.3  | 321.6  | 0.0 |
| 41(1) | 40(1) | 301.9  | 298.2  | 0.0 |
| 42(1) | 1(1)  | 3856.9 | 3667.3 | 0.0 |
| 42(1) | 2(1)  | 3791.1 | 3608.9 | 0.0 |
| 42(1) | 3(1)  | 3257.4 | 3126.6 | 0.0 |
| 42(1) | 4(1)  | 3244.7 | 3113.0 | 0.0 |
| 42(1) | 5(1)  | 3228.3 | 3096.9 | 0.0 |
| 42(1) | 6(1)  | 1822.5 | 1780.0 | 1.6 |
| 42(1) | 7(1)  | 1706.4 | 1657.4 | 0.0 |
| 42(1) | 8(1)  | 1671.7 | 1626.5 | 0.1 |
| 42(1) | 9(1)  | 1588.0 | 1548.0 | 0.1 |
| 42(1) | 10(1) | 1535.3 | 1493.5 | 0.0 |
| 42(1) | 11(1) | 1429.3 | 1388.6 | 0.1 |
| 42(1) | 12(1) | 1412.2 | 1375.6 | 0.0 |
| 42(1) | 13(1) | 1390.9 | 1354.2 | 0.0 |

|       |       |        |        |     |
|-------|-------|--------|--------|-----|
| 42(1) | 14(1) | 1320.2 | 1287.1 | 0.0 |
| 42(1) | 15(1) | 1258.4 | 1221.5 | 0.5 |
| 42(1) | 16(1) | 1248.6 | 1214.3 | 0.0 |
| 42(1) | 17(1) | 1232.1 | 1202.5 | 0.1 |
| 42(1) | 18(1) | 1177.8 | 1152.0 | 0.3 |
| 42(1) | 19(1) | 1152.1 | 1125.6 | 0.5 |
| 42(1) | 20(1) | 1055.1 | 1027.1 | 0.0 |
| 42(1) | 21(1) | 1038.1 | 1017.8 | 0.0 |
| 42(1) | 22(1) | 909.1  | 891.4  | 0.1 |
| 42(1) | 23(1) | 898.9  | 889.9  | 0.0 |
| 42(1) | 24(1) | 836.0  | 818.4  | 0.1 |
| 42(1) | 25(1) | 806.4  | 786.9  | 0.0 |
| 42(1) | 26(1) | 791.2  | 773.1  | 0.0 |
| 42(1) | 27(1) | 755.5  | 745.1  | 0.7 |
| 42(1) | 28(1) | 699.4  | 684.4  | 0.1 |
| 42(1) | 29(1) | 662.2  | 649.1  | 0.6 |
| 42(1) | 30(1) | 639.5  | 630.7  | 1.0 |
| 42(1) | 31(1) | 631.0  | 617.3  | 0.5 |
| 42(1) | 32(1) | 575.8  | 565.9  | 0.0 |
| 42(1) | 33(1) | 517.9  | 506.3  | 0.1 |
| 42(1) | 34(1) | 453.0  | 443.7  | 0.0 |
| 42(1) | 35(1) | 439.7  | 382.9  | 0.0 |
| 42(1) | 36(1) | 402.3  | 395.3  | 0.0 |
| 42(1) | 37(1) | 367.0  | 357.4  | 0.0 |
| 42(1) | 38(1) | 338.5  | 327.6  | 0.1 |
| 42(1) | 39(1) | 271.9  | 259.3  | 0.0 |
| 42(1) | 40(1) | 247.6  | 236.9  | 0.0 |
| 42(1) | 41(1) | 146.1  | 138.5  | 0.0 |

**Table S14.** Harmonic and anharmonic vibrational frequencies and their intensities of conformer **B2** as computed at the B3LYP/cc-pVTZ level of theory.

| Mode (quanta) | $\nu_{\text{harm}}$<br>( $\text{cm}^{-1}$ ) | $\nu_{\text{anharm}}$<br>( $\text{cm}^{-1}$ ) | $I_{\text{harm}}$<br>( $\text{km mol}^{-1}$ ) | $I_{\text{anharm}}$<br>( $\text{km mol}^{-1}$ ) |
|---------------|---------------------------------------------|-----------------------------------------------|-----------------------------------------------|-------------------------------------------------|
| 1(1)          | 3810.8                                      | 3620.6                                        | 85.6                                          | 69.9                                            |
| 2(1)          | 3759.2                                      | 3576.0                                        | 97.1                                          | 79.7                                            |
| 3(1)          | 3221.8                                      | 3093.0                                        | 0.9                                           | 1.7                                             |
| 4(1)          | 3201.6                                      | 3073.3                                        | 1.4                                           | 2.6                                             |
| 5(1)          | 3183.2                                      | 3048.9                                        | 2.2                                           | 3.7                                             |
| 6(1)          | 1798.3                                      | 1768.7                                        | 409.0                                         | 111.0                                           |
| 7(1)          | 1660.7                                      | 1616.4                                        | 311.7                                         | 157.8                                           |
| 8(1)          | 1626.5                                      | 1589.1                                        | 46.2                                          | 31.5                                            |
| 9(1)          | 1544.9                                      | 1508.6                                        | 48.2                                          | 23.0                                            |
| 10(1)         | 1479.4                                      | 1447.2                                        | 50.3                                          | 30.7                                            |
| 11(1)         | 1374.6                                      | 1352.3                                        | 139.1                                         | 94.7                                            |
| 12(1)         | 1357.1                                      | 1320.8                                        | 9.3                                           | 20.4                                            |
| 13(1)         | 1348.8                                      | 1307.7                                        | 35.7                                          | 12.5                                            |
| 14(1)         | 1284.5                                      | 1256.1                                        | 26.6                                          | 31.1                                            |
| 15(1)         | 1211.2                                      | 1175.6                                        | 70.6                                          | 89.8                                            |
| 16(1)         | 1203.0                                      | 1178.6                                        | 120.0                                         | 15.7                                            |
| 17(1)         | 1184.4                                      | 1158.4                                        | 246.8                                         | 254.4                                           |
| 18(1)         | 1149.8                                      | 1126.6                                        | 156.2                                         | 110.1                                           |
| 19(1)         | 1076.1                                      | 1050.1                                        | 180.4                                         | 19.0                                            |
| 20(1)         | 996.1                                       | 977.8                                         | 0.1                                           | 0.1                                             |
| 21(1)         | 993.7                                       | 978.1                                         | 19.2                                          | 17.6                                            |
| 22(1)         | 859.2                                       | 850.1                                         | 43.1                                          | 120.5                                           |
| 23(1)         | 855.7                                       | 844.5                                         | 11.0                                          | 28.1                                            |
| 24(1)         | 788.6                                       | 778.3                                         | 22.4                                          | 18.4                                            |
| 25(1)         | 760.2                                       | 747.8                                         | 6.4                                           | 9.8                                             |
| 26(1)         | 744.6                                       | 731.8                                         | 9.0                                           | 5.3                                             |
| 27(1)         | 706.3                                       | 697.3                                         | 36.9                                          | 32.9                                            |
| 28(1)         | 649.7                                       | 640.7                                         | 0.5                                           | 1.4                                             |
| 29(1)         | 603.1                                       | 594.5                                         | 28.0                                          | 22.2                                            |
| 30(1)         | 593.3                                       | 588.3                                         | 48.2                                          | 41.3                                            |
| 31(1)         | 577.6                                       | 549.5                                         | 61.0                                          | 66.1                                            |
| 32(1)         | 526.6                                       | 521.9                                         | 1.2                                           | 1.4                                             |
| 33(1)         | 466.0                                       | 460.0                                         | 14.8                                          | 18.8                                            |
| 34(1)         | 409.9                                       | 407.2                                         | 3.9                                           | 3.7                                             |
| 35(1)         | 393.9                                       | 339.5                                         | 105.2                                         | 100.0                                           |
| 36(1)         | 366.9                                       | 362.2                                         | 5.1                                           | 4.7                                             |
| 37(1)         | 316.2                                       | 311.8                                         | 3.1                                           | 2.9                                             |

|       |        |        |     |      |
|-------|--------|--------|-----|------|
| 38(1) | 290.9  | 287.1  | 0.0 | 0.0  |
| 39(1) | 226.5  | 221.0  | 0.5 | 0.6  |
| 40(1) | 197.6  | 195.9  | 1.8 | 1.9  |
| 41(1) | 99.1   | 96.3   | 0.7 | 1.0  |
| 42(1) | 40.9   | 41.8   | 1.0 | 1.2  |
| 1(2)  | 7621.6 | 7072.5 |     | 6.3  |
| 2(2)  | 7518.4 | 6987.6 |     | 5.5  |
| 3(2)  | 6443.5 | 6105.7 |     | 0.5  |
| 4(2)  | 6403.2 | 6067.8 |     | 0.9  |
| 5(2)  | 6366.4 | 6000.1 |     | 0.6  |
| 6(2)  | 3596.7 | 3519.2 |     | 3.5  |
| 7(2)  | 3321.3 | 3229.9 |     | 0.5  |
| 8(2)  | 3252.9 | 3173.7 |     | 1.3  |
| 9(2)  | 3089.8 | 3010.1 |     | 0.1  |
| 10(2) | 2958.7 | 2889.9 |     | 0.1  |
| 11(2) | 2749.2 | 2684.2 |     | 0.2  |
| 12(2) | 2714.1 | 2647.8 |     | 0.1  |
| 13(2) | 2697.5 | 2633.3 |     | 0.1  |
| 14(2) | 2568.9 | 2515.1 |     | 0.1  |
| 15(2) | 2422.3 | 2347.7 |     | 0.3  |
| 16(2) | 2405.9 | 2355.4 |     | 0.5  |
| 17(2) | 2368.7 | 2312.4 |     | 0.6  |
| 18(2) | 2299.6 | 2253.0 |     | 0.1  |
| 19(2) | 2152.3 | 2096.7 |     | 1.7  |
| 20(2) | 1992.2 | 1953.3 |     | 3.1  |
| 21(2) | 1987.5 | 1955.1 |     | 0.4  |
| 22(2) | 1718.4 | 1702.2 |     | 0.4  |
| 23(2) | 1711.4 | 1689.2 |     | 0.2  |
| 24(2) | 1577.1 | 1556.9 |     | 0.2  |
| 25(2) | 1520.3 | 1494.7 |     | 1.0  |
| 26(2) | 1489.3 | 1463.1 |     | 0.2  |
| 27(2) | 1412.5 | 1395.6 |     | 0.4  |
| 28(2) | 1299.5 | 1281.5 |     | 0.0  |
| 29(2) | 1206.2 | 1188.3 |     | 3.8  |
| 30(2) | 1186.7 | 1176.6 |     | 8.4  |
| 31(2) | 1155.3 | 1080.3 |     | 30.7 |
| 32(2) | 1053.2 | 1043.6 |     | 0.2  |
| 33(2) | 932.0  | 919.4  |     | 0.1  |
| 34(2) | 819.9  | 814.5  |     | 0.1  |
| 35(2) | 787.7  | 648.2  |     | 5.7  |



|       |      |        |        |     |
|-------|------|--------|--------|-----|
| 36(2) |      | 733.7  | 724.1  | 0.6 |
| 37(2) |      | 632.3  | 623.7  | 0.1 |
| 38(2) |      | 581.8  | 574.2  | 1.0 |
| 39(2) |      | 452.9  | 441.8  | 0.3 |
| 40(2) |      | 395.1  | 390.1  | 0.1 |
| 41(2) |      | 198.3  | 191.1  | 0.0 |
| 42(2) |      | 81.8   | 86.4   | 0.0 |
| 2(1)  | 1(1) | 7570.0 | 7196.5 | 0.0 |
| 3(1)  | 1(1) | 7032.6 | 6716.4 | 0.0 |
| 3(1)  | 2(1) | 6981.0 | 6671.6 | 0.0 |
| 4(1)  | 1(1) | 7012.4 | 6698.2 | 0.0 |
| 4(1)  | 2(1) | 6960.8 | 6653.7 | 0.0 |
| 4(1)  | 3(1) | 6423.4 | 6126.9 | 0.2 |
| 5(1)  | 1(1) | 6994.0 | 6675.7 | 0.0 |
| 5(1)  | 2(1) | 6942.4 | 6632.2 | 0.0 |
| 5(1)  | 3(1) | 6404.9 | 6152.2 | 0.0 |
| 5(1)  | 4(1) | 6384.8 | 6133.9 | 0.0 |
| 6(1)  | 1(1) | 5609.1 | 5389.1 | 0.0 |
| 6(1)  | 2(1) | 5557.6 | 5343.3 | 0.9 |
| 6(1)  | 3(1) | 5020.1 | 4864.3 | 0.0 |
| 6(1)  | 4(1) | 4999.9 | 4846.5 | 0.0 |
| 6(1)  | 5(1) | 4981.5 | 4825.0 | 0.0 |
| 7(1)  | 1(1) | 5471.5 | 5235.9 | 0.1 |
| 7(1)  | 2(1) | 5419.9 | 5192.2 | 0.0 |
| 7(1)  | 3(1) | 4882.4 | 4710.3 | 0.1 |
| 7(1)  | 4(1) | 4862.3 | 4699.7 | 0.1 |
| 7(1)  | 5(1) | 4843.8 | 4674.3 | 0.1 |
| 7(1)  | 6(1) | 3459.0 | 3384.7 | 0.3 |
| 8(1)  | 1(1) | 5437.3 | 5207.8 | 0.6 |
| 8(1)  | 2(1) | 5385.7 | 5165.0 | 0.0 |
| 8(1)  | 3(1) | 4848.2 | 4686.2 | 0.1 |
| 8(1)  | 4(1) | 4828.1 | 4665.4 | 0.2 |
| 8(1)  | 5(1) | 4809.7 | 4643.9 | 0.2 |
| 8(1)  | 6(1) | 3424.8 | 3356.9 | 0.1 |
| 8(1)  | 7(1) | 3287.1 | 3205.6 | 0.0 |
| 9(1)  | 1(1) | 5355.7 | 5127.5 | 0.1 |
| 9(1)  | 2(1) | 5304.1 | 5084.4 | 0.0 |
| 9(1)  | 3(1) | 4766.7 | 4610.6 | 0.0 |
| 9(1)  | 4(1) | 4746.5 | 4585.5 | 0.0 |
| 9(1)  | 5(1) | 4728.1 | 4565.9 | 0.0 |

|       |       |        |        |     |
|-------|-------|--------|--------|-----|
| 9(1)  | 6(1)  | 3343.2 | 3276.9 | 0.1 |
| 9(1)  | 7(1)  | 3205.6 | 3132.8 | 0.1 |
| 9(1)  | 8(1)  | 3171.4 | 3090.5 | 0.1 |
| 10(1) | 1(1)  | 5290.2 | 5067.1 | 0.5 |
| 10(1) | 2(1)  | 5238.6 | 5023.1 | 0.0 |
| 10(1) | 3(1)  | 4701.1 | 4542.9 | 0.0 |
| 10(1) | 4(1)  | 4681.0 | 4531.4 | 0.0 |
| 10(1) | 5(1)  | 4662.6 | 4506.4 | 0.1 |
| 10(1) | 6(1)  | 3277.7 | 3215.7 | 0.0 |
| 10(1) | 7(1)  | 3140.0 | 3047.1 | 0.2 |
| 10(1) | 8(1)  | 3105.8 | 3031.7 | 0.0 |
| 10(1) | 9(1)  | 3024.3 | 2952.6 | 0.0 |
| 11(1) | 1(1)  | 5185.4 | 4963.4 | 0.2 |
| 11(1) | 2(1)  | 5133.8 | 4913.6 | 0.3 |
| 11(1) | 3(1)  | 4596.3 | 4442.6 | 0.0 |
| 11(1) | 4(1)  | 4576.2 | 4422.1 | 0.0 |
| 11(1) | 5(1)  | 4557.8 | 4401.8 | 0.0 |
| 11(1) | 6(1)  | 3172.9 | 3111.1 | 0.9 |
| 11(1) | 7(1)  | 3035.2 | 2953.1 | 0.7 |
| 11(1) | 8(1)  | 3001.1 | 2927.9 | 0.1 |
| 11(1) | 9(1)  | 2919.5 | 2847.2 | 0.6 |
| 11(1) | 10(1) | 2854.0 | 2788.9 | 0.5 |
| 12(1) | 1(1)  | 5167.9 | 4946.0 | 0.0 |
| 12(1) | 2(1)  | 5116.3 | 4897.3 | 0.3 |
| 12(1) | 3(1)  | 4578.8 | 4419.9 | 0.0 |
| 12(1) | 4(1)  | 4558.7 | 4404.7 | 0.1 |
| 12(1) | 5(1)  | 4540.3 | 4382.7 | 0.2 |
| 12(1) | 6(1)  | 3155.4 | 3092.9 | 0.2 |
| 12(1) | 7(1)  | 3017.7 | 2934.3 | 0.0 |
| 12(1) | 8(1)  | 2983.5 | 2910.9 | 0.0 |
| 12(1) | 9(1)  | 2902.0 | 2830.4 | 0.9 |
| 12(1) | 10(1) | 2836.4 | 2768.8 | 0.2 |
| 12(1) | 11(1) | 2731.7 | 2666.1 | 1.5 |
| 13(1) | 1(1)  | 5159.6 | 4933.4 | 0.3 |
| 13(1) | 2(1)  | 5108.0 | 4889.8 | 0.3 |
| 13(1) | 3(1)  | 4570.5 | 4413.9 | 0.1 |
| 13(1) | 4(1)  | 4550.4 | 4395.9 | 0.1 |
| 13(1) | 5(1)  | 4532.0 | 4374.5 | 0.1 |
| 13(1) | 6(1)  | 3147.1 | 3085.9 | 0.4 |
| 13(1) | 7(1)  | 3009.4 | 2930.0 | 0.0 |

|       |       |        |        |     |
|-------|-------|--------|--------|-----|
| 13(1) | 8(1)  | 2975.2 | 2905.2 | 0.1 |
| 13(1) | 9(1)  | 2893.7 | 2823.2 | 0.5 |
| 13(1) | 10(1) | 2828.1 | 2762.5 | 0.7 |
| 13(1) | 11(1) | 2723.4 | 2658.4 | 1.6 |
| 13(1) | 12(1) | 2705.8 | 2641.4 | 0.3 |
| 14(1) | 1(1)  | 5095.3 | 4879.4 | 0.1 |
| 14(1) | 2(1)  | 5043.7 | 4835.1 | 0.0 |
| 14(1) | 3(1)  | 4506.2 | 4348.6 | 0.0 |
| 14(1) | 4(1)  | 4486.1 | 4335.4 | 0.1 |
| 14(1) | 5(1)  | 4467.7 | 4311.5 | 0.1 |
| 14(1) | 6(1)  | 3082.8 | 3027.1 | 0.0 |
| 14(1) | 7(1)  | 2945.1 | 2871.9 | 0.1 |
| 14(1) | 8(1)  | 2910.9 | 2844.9 | 0.0 |
| 14(1) | 9(1)  | 2829.4 | 2764.3 | 0.2 |
| 14(1) | 10(1) | 2763.8 | 2703.8 | 0.0 |
| 14(1) | 11(1) | 2659.1 | 2600.8 | 0.3 |
| 14(1) | 12(1) | 2641.5 | 2582.5 | 0.2 |
| 14(1) | 13(1) | 2633.2 | 2575.3 | 0.2 |
| 15(1) | 1(1)  | 5022.0 | 4793.7 | 0.6 |
| 15(1) | 2(1)  | 4970.4 | 4746.8 | 0.3 |
| 15(1) | 3(1)  | 4432.9 | 4269.7 | 0.1 |
| 15(1) | 4(1)  | 4412.8 | 4252.1 | 0.0 |
| 15(1) | 5(1)  | 4394.4 | 4231.0 | 0.0 |
| 15(1) | 6(1)  | 3009.5 | 2941.9 | 0.1 |
| 15(1) | 7(1)  | 2871.8 | 2789.5 | 0.0 |
| 15(1) | 8(1)  | 2837.6 | 2763.4 | 0.1 |
| 15(1) | 9(1)  | 2756.1 | 2682.1 | 0.8 |
| 15(1) | 10(1) | 2690.5 | 2620.1 | 0.4 |
| 15(1) | 11(1) | 2585.8 | 2515.9 | 0.1 |
| 15(1) | 12(1) | 2568.2 | 2498.7 | 0.9 |
| 15(1) | 13(1) | 2559.9 | 2489.5 | 0.9 |
| 15(1) | 14(1) | 2495.6 | 2432.7 | 0.6 |
| 16(1) | 1(1)  | 5013.8 | 4799.1 | 0.1 |
| 16(1) | 2(1)  | 4962.2 | 4752.3 | 0.1 |
| 16(1) | 3(1)  | 4424.7 | 4273.2 | 0.0 |
| 16(1) | 4(1)  | 4404.6 | 4253.4 | 0.0 |
| 16(1) | 5(1)  | 4386.1 | 4233.1 | 0.1 |
| 16(1) | 6(1)  | 3001.3 | 2947.0 | 0.0 |
| 16(1) | 7(1)  | 2863.6 | 2791.5 | 0.3 |
| 16(1) | 8(1)  | 2829.4 | 2766.3 | 0.0 |

|       |       |        |        |     |
|-------|-------|--------|--------|-----|
| 16(1) | 9(1)  | 2747.9 | 2683.8 | 0.2 |
| 16(1) | 10(1) | 2682.3 | 2622.8 | 0.2 |
| 16(1) | 11(1) | 2577.5 | 2520.0 | 0.2 |
| 16(1) | 12(1) | 2560.0 | 2500.5 | 1.0 |
| 16(1) | 13(1) | 2551.7 | 2494.5 | 0.5 |
| 16(1) | 14(1) | 2487.4 | 2436.0 | 0.3 |
| 16(1) | 15(1) | 2414.1 | 2351.7 | 0.2 |
| 17(1) | 1(1)  | 4995.2 | 4772.3 | 0.5 |
| 17(1) | 2(1)  | 4943.6 | 4732.3 | 0.1 |
| 17(1) | 3(1)  | 4406.1 | 4254.2 | 0.0 |
| 17(1) | 4(1)  | 4386.0 | 4235.6 | 0.0 |
| 17(1) | 5(1)  | 4367.5 | 4210.0 | 0.0 |
| 17(1) | 6(1)  | 2982.7 | 2927.1 | 0.1 |
| 17(1) | 7(1)  | 2845.0 | 2772.7 | 0.1 |
| 17(1) | 8(1)  | 2810.8 | 2742.6 | 0.2 |
| 17(1) | 9(1)  | 2729.3 | 2664.2 | 0.2 |
| 17(1) | 10(1) | 2663.7 | 2602.0 | 0.1 |
| 17(1) | 11(1) | 2559.0 | 2499.9 | 0.6 |
| 17(1) | 12(1) | 2541.4 | 2482.9 | 0.9 |
| 17(1) | 13(1) | 2533.1 | 2472.3 | 0.3 |
| 17(1) | 14(1) | 2468.8 | 2415.6 | 0.1 |
| 17(1) | 15(1) | 2395.5 | 2327.4 | 2.0 |
| 17(1) | 16(1) | 2387.3 | 2335.4 | 1.1 |
| 18(1) | 1(1)  | 4960.6 | 4747.2 | 0.0 |
| 18(1) | 2(1)  | 4909.0 | 4702.3 | 0.1 |
| 18(1) | 3(1)  | 4371.5 | 4220.6 | 0.0 |
| 18(1) | 4(1)  | 4351.4 | 4197.5 | 0.1 |
| 18(1) | 5(1)  | 4333.0 | 4181.8 | 0.1 |
| 18(1) | 6(1)  | 2948.1 | 2894.7 | 0.2 |
| 18(1) | 7(1)  | 2810.4 | 2739.5 | 0.5 |
| 18(1) | 8(1)  | 2776.3 | 2713.8 | 0.0 |
| 18(1) | 9(1)  | 2694.7 | 2632.8 | 0.1 |
| 18(1) | 10(1) | 2629.2 | 2571.2 | 0.5 |
| 18(1) | 11(1) | 2524.4 | 2468.2 | 0.0 |
| 18(1) | 12(1) | 2506.9 | 2449.5 | 0.3 |
| 18(1) | 13(1) | 2498.5 | 2443.7 | 0.4 |
| 18(1) | 14(1) | 2434.2 | 2385.0 | 0.2 |
| 18(1) | 15(1) | 2361.0 | 2300.5 | 0.2 |
| 18(1) | 16(1) | 2352.7 | 2304.0 | 0.2 |
| 18(1) | 17(1) | 2334.1 | 2284.3 | 0.6 |

|       |       |        |        |     |
|-------|-------|--------|--------|-----|
| 19(1) | 1(1)  | 4886.9 | 4671.1 | 0.0 |
| 19(1) | 2(1)  | 4835.3 | 4628.1 | 0.1 |
| 19(1) | 3(1)  | 4297.9 | 4146.1 | 0.2 |
| 19(1) | 4(1)  | 4277.7 | 4127.8 | 0.1 |
| 19(1) | 5(1)  | 4259.3 | 4106.3 | 0.1 |
| 19(1) | 6(1)  | 2874.5 | 2817.9 | 0.3 |
| 19(1) | 7(1)  | 2736.8 | 2664.6 | 0.0 |
| 19(1) | 8(1)  | 2702.6 | 2638.6 | 0.0 |
| 19(1) | 9(1)  | 2621.0 | 2558.3 | 0.1 |
| 19(1) | 10(1) | 2555.5 | 2497.2 | 0.2 |
| 19(1) | 11(1) | 2450.7 | 2390.0 | 0.5 |
| 19(1) | 12(1) | 2433.2 | 2373.7 | 0.3 |
| 19(1) | 13(1) | 2424.9 | 2366.5 | 0.3 |
| 19(1) | 14(1) | 2360.6 | 2308.7 | 0.0 |
| 19(1) | 15(1) | 2287.3 | 2224.5 | 0.1 |
| 19(1) | 16(1) | 2279.1 | 2228.4 | 0.2 |
| 19(1) | 17(1) | 2260.5 | 2208.1 | 0.2 |
| 19(1) | 18(1) | 2225.9 | 2174.9 | 1.0 |
| 20(1) | 1(1)  | 4806.9 | 4598.3 | 0.0 |
| 20(1) | 2(1)  | 4755.3 | 4553.5 | 0.0 |
| 20(1) | 3(1)  | 4217.9 | 4060.6 | 0.0 |
| 20(1) | 4(1)  | 4197.7 | 4048.4 | 0.0 |
| 20(1) | 5(1)  | 4179.3 | 4033.9 | 0.0 |
| 20(1) | 6(1)  | 2794.4 | 2746.4 | 0.0 |
| 20(1) | 7(1)  | 2656.7 | 2592.4 | 0.0 |
| 20(1) | 8(1)  | 2622.6 | 2565.2 | 0.0 |
| 20(1) | 9(1)  | 2541.0 | 2485.5 | 0.0 |
| 20(1) | 10(1) | 2475.5 | 2426.1 | 0.0 |
| 20(1) | 11(1) | 2370.7 | 2321.3 | 0.0 |
| 20(1) | 12(1) | 2353.2 | 2302.5 | 0.0 |
| 20(1) | 13(1) | 2344.9 | 2296.1 | 0.0 |
| 20(1) | 14(1) | 2280.6 | 2236.5 | 0.0 |
| 20(1) | 15(1) | 2207.3 | 2153.3 | 0.0 |
| 20(1) | 16(1) | 2199.0 | 2155.5 | 0.0 |
| 20(1) | 17(1) | 2180.5 | 2135.7 | 0.0 |
| 20(1) | 18(1) | 2145.9 | 2103.9 | 0.0 |
| 20(1) | 19(1) | 2072.2 | 2028.6 | 0.0 |
| 21(1) | 1(1)  | 4804.6 | 4597.9 | 0.0 |
| 21(1) | 2(1)  | 4753.0 | 4554.1 | 0.0 |
| 21(1) | 3(1)  | 4215.5 | 4072.9 | 0.0 |

|       |       |        |        |     |
|-------|-------|--------|--------|-----|
| 21(1) | 4(1)  | 4195.3 | 4054.6 | 0.3 |
| 21(1) | 5(1)  | 4176.9 | 4031.9 | 0.2 |
| 21(1) | 6(1)  | 2792.1 | 2746.8 | 0.0 |
| 21(1) | 7(1)  | 2654.4 | 2592.0 | 0.0 |
| 21(1) | 8(1)  | 2620.2 | 2563.4 | 0.0 |
| 21(1) | 9(1)  | 2538.6 | 2484.4 | 0.3 |
| 21(1) | 10(1) | 2473.1 | 2423.9 | 0.6 |
| 21(1) | 11(1) | 2368.3 | 2321.5 | 0.0 |
| 21(1) | 12(1) | 2350.8 | 2302.0 | 0.4 |
| 21(1) | 13(1) | 2342.5 | 2294.4 | 0.3 |
| 21(1) | 14(1) | 2278.2 | 2236.3 | 0.2 |
| 21(1) | 15(1) | 2204.9 | 2153.0 | 0.5 |
| 21(1) | 16(1) | 2196.7 | 2155.9 | 0.3 |
| 21(1) | 17(1) | 2178.1 | 2135.2 | 0.3 |
| 21(1) | 18(1) | 2143.5 | 2104.6 | 0.5 |
| 21(1) | 19(1) | 2069.9 | 2028.4 | 0.3 |
| 21(1) | 20(1) | 1989.8 | 1955.9 | 0.0 |
| 22(1) | 1(1)  | 4670.0 | 4470.0 | 0.0 |
| 22(1) | 2(1)  | 4618.4 | 4425.9 | 0.0 |
| 22(1) | 3(1)  | 4081.0 | 3943.6 | 0.0 |
| 22(1) | 4(1)  | 4060.8 | 3921.8 | 0.0 |
| 22(1) | 5(1)  | 4042.4 | 3899.9 | 0.0 |
| 22(1) | 6(1)  | 2657.5 | 2618.7 | 0.0 |
| 22(1) | 7(1)  | 2519.9 | 2464.3 | 0.0 |
| 22(1) | 8(1)  | 2485.7 | 2437.1 | 0.0 |
| 22(1) | 9(1)  | 2404.1 | 2358.1 | 0.0 |
| 22(1) | 10(1) | 2338.6 | 2296.5 | 0.0 |
| 22(1) | 11(1) | 2233.8 | 2193.6 | 0.0 |
| 22(1) | 12(1) | 2216.3 | 2175.6 | 0.0 |
| 22(1) | 13(1) | 2208.0 | 2168.3 | 0.0 |
| 22(1) | 14(1) | 2143.7 | 2109.3 | 0.0 |
| 22(1) | 15(1) | 2070.4 | 2022.9 | 0.0 |
| 22(1) | 16(1) | 2062.2 | 2028.7 | 0.0 |
| 22(1) | 17(1) | 2043.6 | 2006.4 | 0.0 |
| 22(1) | 18(1) | 2009.0 | 1977.3 | 0.0 |
| 22(1) | 19(1) | 1935.3 | 1900.3 | 0.0 |
| 22(1) | 20(1) | 1855.3 | 1827.6 | 0.4 |
| 22(1) | 21(1) | 1852.9 | 1827.4 | 0.0 |
| 23(1) | 1(1)  | 4666.5 | 4464.4 | 0.0 |
| 23(1) | 2(1)  | 4614.9 | 4420.3 | 0.0 |

|       |       |        |        |     |
|-------|-------|--------|--------|-----|
| 23(1) | 3(1)  | 4077.4 | 3939.1 | 0.0 |
| 23(1) | 4(1)  | 4057.3 | 3919.4 | 0.0 |
| 23(1) | 5(1)  | 4038.9 | 3893.1 | 0.0 |
| 23(1) | 6(1)  | 2654.0 | 2612.8 | 0.0 |
| 23(1) | 7(1)  | 2516.3 | 2459.1 | 0.0 |
| 23(1) | 8(1)  | 2482.2 | 2432.1 | 0.0 |
| 23(1) | 9(1)  | 2400.6 | 2353.0 | 0.0 |
| 23(1) | 10(1) | 2335.1 | 2289.9 | 0.0 |
| 23(1) | 11(1) | 2230.3 | 2187.4 | 0.0 |
| 23(1) | 12(1) | 2212.8 | 2169.2 | 0.0 |
| 23(1) | 13(1) | 2204.5 | 2161.9 | 0.0 |
| 23(1) | 14(1) | 2140.2 | 2102.8 | 0.0 |
| 23(1) | 15(1) | 2066.9 | 2019.1 | 0.0 |
| 23(1) | 16(1) | 2058.6 | 2023.0 | 0.0 |
| 23(1) | 17(1) | 2040.0 | 2002.6 | 0.0 |
| 23(1) | 18(1) | 2005.5 | 1972.0 | 0.0 |
| 23(1) | 19(1) | 1931.8 | 1894.4 | 0.0 |
| 23(1) | 20(1) | 1851.8 | 1821.3 | 0.7 |
| 23(1) | 21(1) | 1849.4 | 1822.4 | 0.0 |
| 23(1) | 22(1) | 1714.9 | 1694.9 | 2.8 |
| 24(1) | 1(1)  | 4599.4 | 4398.4 | 0.0 |
| 24(1) | 2(1)  | 4547.8 | 4354.1 | 0.0 |
| 24(1) | 3(1)  | 4010.3 | 3872.2 | 0.0 |
| 24(1) | 4(1)  | 3990.2 | 3854.2 | 0.0 |
| 24(1) | 5(1)  | 3971.7 | 3832.3 | 0.0 |
| 24(1) | 6(1)  | 2586.9 | 2545.1 | 0.0 |
| 24(1) | 7(1)  | 2449.2 | 2394.1 | 0.0 |
| 24(1) | 8(1)  | 2415.0 | 2366.5 | 0.0 |
| 24(1) | 9(1)  | 2333.5 | 2286.1 | 0.0 |
| 24(1) | 10(1) | 2267.9 | 2225.4 | 0.0 |
| 24(1) | 11(1) | 2163.2 | 2120.3 | 0.0 |
| 24(1) | 12(1) | 2145.6 | 2103.0 | 0.0 |
| 24(1) | 13(1) | 2137.3 | 2095.6 | 0.0 |
| 24(1) | 14(1) | 2073.0 | 2037.9 | 0.0 |
| 24(1) | 15(1) | 1999.7 | 1952.3 | 0.0 |
| 24(1) | 16(1) | 1991.5 | 1956.2 | 0.0 |
| 24(1) | 17(1) | 1972.9 | 1935.9 | 0.0 |
| 24(1) | 18(1) | 1938.3 | 1904.9 | 0.0 |
| 24(1) | 19(1) | 1864.7 | 1827.5 | 0.0 |
| 24(1) | 20(1) | 1784.7 | 1755.3 | 5.2 |

|       |       |        |        |     |
|-------|-------|--------|--------|-----|
| 24(1) | 21(1) | 1782.3 | 1756.3 | 0.0 |
| 24(1) | 22(1) | 1647.8 | 1628.5 | 1.0 |
| 24(1) | 23(1) | 1644.3 | 1622.2 | 5.9 |
| 25(1) | 1(1)  | 4571.0 | 4368.1 | 0.0 |
| 25(1) | 2(1)  | 4519.4 | 4323.5 | 0.0 |
| 25(1) | 3(1)  | 3981.9 | 3843.0 | 0.1 |
| 25(1) | 4(1)  | 3961.8 | 3825.6 | 0.1 |
| 25(1) | 5(1)  | 3943.4 | 3804.0 | 0.0 |
| 25(1) | 6(1)  | 2558.5 | 2516.3 | 0.0 |
| 25(1) | 7(1)  | 2420.8 | 2362.7 | 1.1 |
| 25(1) | 8(1)  | 2386.6 | 2335.6 | 0.3 |
| 25(1) | 9(1)  | 2305.1 | 2255.3 | 0.1 |
| 25(1) | 10(1) | 2239.5 | 2193.9 | 0.1 |
| 25(1) | 11(1) | 2134.8 | 2090.8 | 0.2 |
| 25(1) | 12(1) | 2117.2 | 2071.8 | 0.3 |
| 25(1) | 13(1) | 2108.9 | 2064.9 | 0.2 |
| 25(1) | 14(1) | 2044.6 | 2005.8 | 0.2 |
| 25(1) | 15(1) | 1971.3 | 1923.1 | 0.2 |
| 25(1) | 16(1) | 1963.1 | 1925.9 | 0.8 |
| 25(1) | 17(1) | 1944.5 | 1905.9 | 0.3 |
| 25(1) | 18(1) | 1909.9 | 1874.2 | 0.7 |
| 25(1) | 19(1) | 1836.3 | 1797.8 | 0.3 |
| 25(1) | 20(1) | 1756.3 | 1725.3 | 0.0 |
| 25(1) | 21(1) | 1753.9 | 1725.6 | 0.2 |
| 25(1) | 22(1) | 1619.4 | 1597.6 | 0.0 |
| 25(1) | 23(1) | 1615.9 | 1592.1 | 0.0 |
| 25(1) | 24(1) | 1548.7 | 1525.7 | 0.0 |
| 26(1) | 1(1)  | 4555.5 | 4352.1 | 0.0 |
| 26(1) | 2(1)  | 4503.9 | 4305.2 | 0.1 |
| 26(1) | 3(1)  | 3966.4 | 3827.7 | 0.0 |
| 26(1) | 4(1)  | 3946.2 | 3809.4 | 0.1 |
| 26(1) | 5(1)  | 3927.8 | 3787.7 | 0.0 |
| 26(1) | 6(1)  | 2543.0 | 2498.4 | 0.1 |
| 26(1) | 7(1)  | 2405.3 | 2347.1 | 0.0 |
| 26(1) | 8(1)  | 2371.1 | 2319.9 | 0.0 |
| 26(1) | 9(1)  | 2289.5 | 2239.2 | 0.3 |
| 26(1) | 10(1) | 2224.0 | 2178.5 | 0.0 |
| 26(1) | 11(1) | 2119.2 | 2075.3 | 0.4 |
| 26(1) | 12(1) | 2101.7 | 2056.2 | 0.2 |
| 26(1) | 13(1) | 2093.4 | 2050.2 | 0.1 |



|       |       |        |        |     |
|-------|-------|--------|--------|-----|
| 26(1) | 14(1) | 2029.1 | 1990.4 | 0.1 |
| 26(1) | 15(1) | 1955.8 | 1906.8 | 2.5 |
| 26(1) | 16(1) | 1947.6 | 1909.8 | 0.2 |
| 26(1) | 17(1) | 1929.0 | 1890.0 | 0.5 |
| 26(1) | 18(1) | 1894.4 | 1857.2 | 0.3 |
| 26(1) | 19(1) | 1820.8 | 1780.3 | 3.9 |
| 26(1) | 20(1) | 1740.7 | 1709.5 | 0.0 |
| 26(1) | 21(1) | 1738.4 | 1709.8 | 0.1 |
| 26(1) | 22(1) | 1603.9 | 1581.7 | 0.0 |
| 26(1) | 23(1) | 1600.3 | 1576.0 | 0.0 |
| 26(1) | 24(1) | 1533.2 | 1509.4 | 0.0 |
| 26(1) | 25(1) | 1504.8 | 1479.4 | 0.3 |
| 27(1) | 1(1)  | 4517.1 | 4317.5 | 0.0 |
| 27(1) | 2(1)  | 4465.5 | 4273.1 | 0.0 |
| 27(1) | 3(1)  | 3928.0 | 3792.9 | 0.0 |
| 27(1) | 4(1)  | 3907.9 | 3774.3 | 0.0 |
| 27(1) | 5(1)  | 3889.4 | 3751.1 | 0.0 |
| 27(1) | 6(1)  | 2504.6 | 2465.2 | 0.0 |
| 27(1) | 7(1)  | 2366.9 | 2312.1 | 0.0 |
| 27(1) | 8(1)  | 2332.7 | 2285.1 | 0.0 |
| 27(1) | 9(1)  | 2251.2 | 2204.6 | 0.0 |
| 27(1) | 10(1) | 2185.6 | 2143.7 | 0.0 |
| 27(1) | 11(1) | 2080.8 | 2041.4 | 0.0 |
| 27(1) | 12(1) | 2063.3 | 2022.6 | 0.0 |
| 27(1) | 13(1) | 2055.0 | 2015.7 | 0.0 |
| 27(1) | 14(1) | 1990.7 | 1955.6 | 0.0 |
| 27(1) | 15(1) | 1917.4 | 1870.9 | 0.0 |
| 27(1) | 16(1) | 1909.2 | 1874.9 | 0.0 |
| 27(1) | 17(1) | 1890.6 | 1855.1 | 0.0 |
| 27(1) | 18(1) | 1856.0 | 1821.9 | 0.0 |
| 27(1) | 19(1) | 1782.4 | 1746.7 | 0.0 |
| 27(1) | 20(1) | 1702.3 | 1676.1 | 0.1 |
| 27(1) | 21(1) | 1700.0 | 1674.1 | 0.0 |
| 27(1) | 22(1) | 1565.5 | 1548.0 | 0.4 |
| 27(1) | 23(1) | 1561.9 | 1542.0 | 1.1 |
| 27(1) | 24(1) | 1494.8 | 1476.1 | 2.0 |
| 27(1) | 25(1) | 1466.4 | 1444.9 | 0.0 |
| 27(1) | 26(1) | 1450.9 | 1428.7 | 0.0 |
| 28(1) | 1(1)  | 4460.5 | 4261.1 | 0.0 |
| 28(1) | 2(1)  | 4409.0 | 4216.5 | 0.0 |

|       |       |        |        |      |
|-------|-------|--------|--------|------|
| 28(1) | 3(1)  | 3871.5 | 3736.2 | 0.0  |
| 28(1) | 4(1)  | 3851.3 | 3717.0 | 0.0  |
| 28(1) | 5(1)  | 3832.9 | 3696.4 | 0.0  |
| 28(1) | 6(1)  | 2448.1 | 2409.2 | 0.0  |
| 28(1) | 7(1)  | 2310.4 | 2256.1 | 0.0  |
| 28(1) | 8(1)  | 2276.2 | 2227.7 | 0.0  |
| 28(1) | 9(1)  | 2194.6 | 2150.0 | 0.0  |
| 28(1) | 10(1) | 2129.1 | 2086.4 | 0.0  |
| 28(1) | 11(1) | 2024.3 | 1983.8 | 0.0  |
| 28(1) | 12(1) | 2006.8 | 1965.1 | 0.0  |
| 28(1) | 13(1) | 1998.5 | 1958.1 | 0.0  |
| 28(1) | 14(1) | 1934.2 | 1898.8 | 0.0  |
| 28(1) | 15(1) | 1860.9 | 1814.5 | 0.0  |
| 28(1) | 16(1) | 1852.7 | 1818.2 | 0.0  |
| 28(1) | 17(1) | 1834.1 | 1800.6 | 0.0  |
| 28(1) | 18(1) | 1799.5 | 1767.0 | 0.0  |
| 28(1) | 19(1) | 1725.9 | 1690.7 | 0.0  |
| 28(1) | 20(1) | 1645.8 | 1618.4 | 12.3 |
| 28(1) | 21(1) | 1643.5 | 1617.4 | 0.0  |
| 28(1) | 22(1) | 1508.9 | 1490.3 | 2.8  |
| 28(1) | 23(1) | 1505.4 | 1485.0 | 6.2  |
| 28(1) | 24(1) | 1438.3 | 1419.8 | 1.6  |
| 28(1) | 25(1) | 1409.9 | 1388.0 | 0.0  |
| 28(1) | 26(1) | 1394.4 | 1371.9 | 0.0  |
| 28(1) | 27(1) | 1356.0 | 1340.8 | 1.2  |
| 29(1) | 1(1)  | 4413.9 | 4214.7 | 0.0  |
| 29(1) | 2(1)  | 4362.3 | 4170.1 | 0.0  |
| 29(1) | 3(1)  | 3824.8 | 3690.5 | 0.0  |
| 29(1) | 4(1)  | 3804.7 | 3672.0 | 0.1  |
| 29(1) | 5(1)  | 3786.3 | 3650.6 | 0.0  |
| 29(1) | 6(1)  | 2401.4 | 2360.9 | 0.1  |
| 29(1) | 7(1)  | 2263.7 | 2209.8 | 0.0  |
| 29(1) | 8(1)  | 2229.6 | 2182.8 | 0.0  |
| 29(1) | 9(1)  | 2148.0 | 2101.7 | 0.1  |
| 29(1) | 10(1) | 2082.5 | 2041.2 | 0.0  |
| 29(1) | 11(1) | 1977.7 | 1939.3 | 0.1  |
| 29(1) | 12(1) | 1960.2 | 1919.3 | 0.1  |
| 29(1) | 13(1) | 1951.9 | 1912.2 | 0.1  |
| 29(1) | 14(1) | 1887.6 | 1852.9 | 0.0  |
| 29(1) | 15(1) | 1814.3 | 1771.1 | 15.4 |

|       |       |        |        |       |
|-------|-------|--------|--------|-------|
| 29(1) | 16(1) | 1806.0 | 1773.5 | 40.4  |
| 29(1) | 17(1) | 1787.4 | 1752.2 | 19.6  |
| 29(1) | 18(1) | 1752.9 | 1721.1 | 1.0   |
| 29(1) | 19(1) | 1679.2 | 1644.7 | 1.3   |
| 29(1) | 20(1) | 1599.2 | 1572.2 | 0.0   |
| 29(1) | 21(1) | 1596.8 | 1571.9 | 1.6   |
| 29(1) | 22(1) | 1462.3 | 1444.6 | 0.0   |
| 29(1) | 23(1) | 1458.8 | 1439.0 | 0.0   |
| 29(1) | 24(1) | 1391.6 | 1372.8 | 0.0   |
| 29(1) | 25(1) | 1363.3 | 1341.4 | 6.8   |
| 29(1) | 26(1) | 1347.7 | 1325.4 | 3.8   |
| 29(1) | 27(1) | 1309.3 | 1291.9 | 0.0   |
| 29(1) | 28(1) | 1252.8 | 1236.3 | 0.0   |
| 30(1) | 1(1)  | 4404.2 | 4208.9 | 0.0   |
| 30(1) | 2(1)  | 4352.6 | 4163.0 | 0.1   |
| 30(1) | 3(1)  | 3815.1 | 3684.3 | 0.0   |
| 30(1) | 4(1)  | 3794.9 | 3666.0 | 0.0   |
| 30(1) | 5(1)  | 3776.5 | 3644.4 | 0.1   |
| 30(1) | 6(1)  | 2391.7 | 2355.5 | 0.0   |
| 30(1) | 7(1)  | 2254.0 | 2203.2 | 0.0   |
| 30(1) | 8(1)  | 2219.8 | 2176.3 | 0.0   |
| 30(1) | 9(1)  | 2138.2 | 2095.6 | 0.0   |
| 30(1) | 10(1) | 2072.7 | 2035.1 | 0.0   |
| 30(1) | 11(1) | 1967.9 | 1931.0 | 0.2   |
| 30(1) | 12(1) | 1950.4 | 1912.8 | 0.2   |
| 30(1) | 13(1) | 1942.1 | 1906.8 | 0.1   |
| 30(1) | 14(1) | 1877.8 | 1847.1 | 0.0   |
| 30(1) | 15(1) | 1804.5 | 1764.5 | 52.9  |
| 30(1) | 16(1) | 1796.3 | 1766.5 | 147.7 |
| 30(1) | 17(1) | 1777.7 | 1746.3 | 2.1   |
| 30(1) | 18(1) | 1743.1 | 1714.5 | 0.3   |
| 30(1) | 19(1) | 1669.5 | 1638.4 | 17.9  |
| 30(1) | 20(1) | 1589.4 | 1566.1 | 0.0   |
| 30(1) | 21(1) | 1587.1 | 1566.5 | 0.8   |
| 30(1) | 22(1) | 1452.5 | 1438.3 | 0.0   |
| 30(1) | 23(1) | 1449.0 | 1432.8 | 0.0   |
| 30(1) | 24(1) | 1381.9 | 1366.6 | 0.0   |
| 30(1) | 25(1) | 1353.5 | 1337.3 | 1.4   |
| 30(1) | 26(1) | 1338.0 | 1319.2 | 3.0   |
| 30(1) | 27(1) | 1299.6 | 1285.7 | 0.0   |

|       |       |        |        |      |
|-------|-------|--------|--------|------|
| 30(1) | 28(1) | 1243.1 | 1228.8 | 0.0  |
| 30(1) | 29(1) | 1196.4 | 1182.8 | 0.6  |
| 31(1) | 1(1)  | 4388.5 | 4169.9 | 0.0  |
| 31(1) | 2(1)  | 4336.9 | 4122.0 | 1.1  |
| 31(1) | 3(1)  | 3799.4 | 3645.6 | 0.0  |
| 31(1) | 4(1)  | 3779.2 | 3627.3 | 0.0  |
| 31(1) | 5(1)  | 3760.8 | 3605.5 | 0.0  |
| 31(1) | 6(1)  | 2376.0 | 2318.1 | 0.1  |
| 31(1) | 7(1)  | 2238.3 | 2165.4 | 0.0  |
| 31(1) | 8(1)  | 2204.1 | 2138.2 | 0.0  |
| 31(1) | 9(1)  | 2122.5 | 2057.3 | 0.0  |
| 31(1) | 10(1) | 2057.0 | 1996.7 | 0.0  |
| 31(1) | 11(1) | 1952.2 | 1894.5 | 0.0  |
| 31(1) | 12(1) | 1934.7 | 1876.0 | 0.0  |
| 31(1) | 13(1) | 1926.4 | 1869.9 | 0.0  |
| 31(1) | 14(1) | 1862.1 | 1807.8 | 0.0  |
| 31(1) | 15(1) | 1788.8 | 1723.5 | 0.0  |
| 31(1) | 16(1) | 1780.6 | 1727.4 | 0.0  |
| 31(1) | 17(1) | 1762.0 | 1708.9 | 0.0  |
| 31(1) | 18(1) | 1727.4 | 1672.2 | 0.0  |
| 31(1) | 19(1) | 1653.8 | 1596.5 | 0.0  |
| 31(1) | 20(1) | 1573.7 | 1527.7 | 0.0  |
| 31(1) | 21(1) | 1571.4 | 1527.3 | 0.0  |
| 31(1) | 22(1) | 1436.8 | 1399.8 | 0.1  |
| 31(1) | 23(1) | 1433.3 | 1395.1 | 0.2  |
| 31(1) | 24(1) | 1366.2 | 1332.5 | 3.3  |
| 31(1) | 25(1) | 1337.8 | 1297.1 | 0.0  |
| 31(1) | 26(1) | 1322.3 | 1281.0 | 0.0  |
| 31(1) | 27(1) | 1283.9 | 1239.7 | 29.2 |
| 31(1) | 28(1) | 1227.4 | 1189.5 | 13.6 |
| 31(1) | 29(1) | 1180.7 | 1143.5 | 0.0  |
| 31(1) | 30(1) | 1171.0 | 1138.6 | 0.0  |
| 32(1) | 1(1)  | 4337.4 | 4142.1 | 0.0  |
| 32(1) | 2(1)  | 4285.8 | 4097.6 | 0.0  |
| 32(1) | 3(1)  | 3748.4 | 3617.7 | 0.0  |
| 32(1) | 4(1)  | 3728.2 | 3599.5 | 0.0  |
| 32(1) | 5(1)  | 3709.8 | 3578.1 | 0.1  |
| 32(1) | 6(1)  | 2324.9 | 2290.6 | 0.0  |
| 32(1) | 7(1)  | 2187.3 | 2135.9 | 0.4  |
| 32(1) | 8(1)  | 2153.1 | 2110.1 | 0.1  |

|       |       |        |        |     |
|-------|-------|--------|--------|-----|
| 32(1) | 9(1)  | 2071.5 | 2029.5 | 0.0 |
| 32(1) | 10(1) | 2006.0 | 1967.4 | 0.0 |
| 32(1) | 11(1) | 1901.2 | 1864.9 | 0.2 |
| 32(1) | 12(1) | 1883.7 | 1846.7 | 0.1 |
| 32(1) | 13(1) | 1875.4 | 1839.3 | 0.0 |
| 32(1) | 14(1) | 1811.1 | 1780.8 | 0.7 |
| 32(1) | 15(1) | 1737.8 | 1697.0 | 0.4 |
| 32(1) | 16(1) | 1729.6 | 1700.1 | 0.1 |
| 32(1) | 17(1) | 1711.0 | 1680.2 | 1.4 |
| 32(1) | 18(1) | 1676.4 | 1649.7 | 7.6 |
| 32(1) | 19(1) | 1602.7 | 1572.0 | 0.9 |
| 32(1) | 20(1) | 1522.7 | 1499.6 | 0.0 |
| 32(1) | 21(1) | 1520.4 | 1500.3 | 1.2 |
| 32(1) | 22(1) | 1385.8 | 1371.8 | 0.0 |
| 32(1) | 23(1) | 1382.3 | 1366.4 | 0.0 |
| 32(1) | 24(1) | 1315.2 | 1300.2 | 0.0 |
| 32(1) | 25(1) | 1286.8 | 1270.5 | 0.3 |
| 32(1) | 26(1) | 1271.3 | 1253.5 | 0.1 |
| 32(1) | 27(1) | 1232.9 | 1219.0 | 0.0 |
| 32(1) | 28(1) | 1176.3 | 1162.3 | 0.0 |
| 32(1) | 29(1) | 1129.7 | 1116.2 | 0.0 |
| 32(1) | 30(1) | 1120.0 | 1110.2 | 0.2 |
| 32(1) | 31(1) | 1104.3 | 1071.2 | 0.0 |
| 33(1) | 1(1)  | 4276.8 | 4079.9 | 0.0 |
| 33(1) | 2(1)  | 4225.2 | 4034.9 | 0.1 |
| 33(1) | 3(1)  | 3687.7 | 3554.4 | 0.0 |
| 33(1) | 4(1)  | 3667.6 | 3536.8 | 0.0 |
| 33(1) | 5(1)  | 3649.2 | 3515.3 | 0.0 |
| 33(1) | 6(1)  | 2264.3 | 2228.0 | 0.0 |
| 33(1) | 7(1)  | 2126.6 | 2074.4 | 0.0 |
| 33(1) | 8(1)  | 2092.5 | 2047.4 | 0.0 |
| 33(1) | 9(1)  | 2010.9 | 1967.0 | 0.0 |
| 33(1) | 10(1) | 1945.4 | 1908.4 | 0.0 |
| 33(1) | 11(1) | 1840.6 | 1802.4 | 0.0 |
| 33(1) | 12(1) | 1823.1 | 1784.5 | 0.0 |
| 33(1) | 13(1) | 1814.8 | 1777.7 | 0.0 |
| 33(1) | 14(1) | 1750.4 | 1717.7 | 0.0 |
| 33(1) | 15(1) | 1677.2 | 1634.8 | 0.0 |
| 33(1) | 16(1) | 1668.9 | 1637.7 | 0.0 |
| 33(1) | 17(1) | 1650.3 | 1618.1 | 0.0 |

|       |       |        |        |      |
|-------|-------|--------|--------|------|
| 33(1) | 18(1) | 1615.8 | 1584.6 | 0.0  |
| 33(1) | 19(1) | 1542.1 | 1509.5 | 0.0  |
| 33(1) | 20(1) | 1462.1 | 1435.5 | 10.1 |
| 33(1) | 21(1) | 1459.7 | 1437.2 | 0.0  |
| 33(1) | 22(1) | 1325.2 | 1308.7 | 0.5  |
| 33(1) | 23(1) | 1321.7 | 1303.8 | 2.4  |
| 33(1) | 24(1) | 1254.5 | 1236.4 | 0.7  |
| 33(1) | 25(1) | 1226.2 | 1206.6 | 0.0  |
| 33(1) | 26(1) | 1210.6 | 1189.8 | 0.0  |
| 33(1) | 27(1) | 1172.2 | 1158.0 | 17.4 |
| 33(1) | 28(1) | 1115.7 | 1098.7 | 0.8  |
| 33(1) | 29(1) | 1069.1 | 1053.6 | 0.0  |
| 33(1) | 30(1) | 1059.3 | 1047.9 | 0.0  |
| 33(1) | 31(1) | 1043.6 | 1008.4 | 0.5  |
| 33(1) | 32(1) | 992.6  | 981.3  | 0.0  |
| 34(1) | 1(1)  | 4220.7 | 4027.5 | 0.0  |
| 34(1) | 2(1)  | 4169.2 | 3982.6 | 0.0  |
| 34(1) | 3(1)  | 3631.7 | 3503.2 | 0.0  |
| 34(1) | 4(1)  | 3611.5 | 3485.1 | 0.0  |
| 34(1) | 5(1)  | 3593.1 | 3463.4 | 0.0  |
| 34(1) | 6(1)  | 2208.3 | 2175.4 | 0.0  |
| 34(1) | 7(1)  | 2070.6 | 2022.4 | 0.0  |
| 34(1) | 8(1)  | 2036.4 | 1997.6 | 0.0  |
| 34(1) | 9(1)  | 1954.8 | 1915.1 | 0.1  |
| 34(1) | 10(1) | 1889.3 | 1853.9 | 0.3  |
| 34(1) | 11(1) | 1784.5 | 1750.8 | 2.4  |
| 34(1) | 12(1) | 1767.0 | 1732.3 | 5.4  |
| 34(1) | 13(1) | 1758.7 | 1725.2 | 2.1  |
| 34(1) | 14(1) | 1694.4 | 1666.1 | 0.1  |
| 34(1) | 15(1) | 1621.1 | 1580.8 | 14.9 |
| 34(1) | 16(1) | 1612.9 | 1585.7 | 0.7  |
| 34(1) | 17(1) | 1594.3 | 1565.5 | 1.2  |
| 34(1) | 18(1) | 1559.7 | 1533.5 | 0.4  |
| 34(1) | 19(1) | 1486.1 | 1457.5 | 0.8  |
| 34(1) | 20(1) | 1406.0 | 1385.0 | 0.0  |
| 34(1) | 21(1) | 1403.7 | 1385.2 | 0.6  |
| 34(1) | 22(1) | 1269.1 | 1257.4 | 0.0  |
| 34(1) | 23(1) | 1265.6 | 1251.8 | 0.0  |
| 34(1) | 24(1) | 1198.5 | 1185.6 | 0.0  |
| 34(1) | 25(1) | 1170.1 | 1154.2 | 2.8  |

|       |       |        |        |      |
|-------|-------|--------|--------|------|
| 34(1) | 26(1) | 1154.6 | 1139.0 | 11.9 |
| 34(1) | 27(1) | 1116.2 | 1104.5 | 0.0  |
| 34(1) | 28(1) | 1059.7 | 1047.9 | 0.0  |
| 34(1) | 29(1) | 1013.0 | 1000.9 | 0.1  |
| 34(1) | 30(1) | 1003.3 | 995.4  | 0.1  |
| 34(1) | 31(1) | 987.6  | 956.6  | 0.0  |
| 34(1) | 32(1) | 936.5  | 929.1  | 0.0  |
| 34(1) | 33(1) | 875.9  | 866.9  | 0.0  |
| 35(1) | 1(1)  | 4204.7 | 3946.9 | 1.4  |
| 35(1) | 2(1)  | 4153.1 | 3915.2 | 0.0  |
| 35(1) | 3(1)  | 3615.6 | 3435.4 | 0.0  |
| 35(1) | 4(1)  | 3595.4 | 3417.3 | 0.0  |
| 35(1) | 5(1)  | 3577.0 | 3398.7 | 0.0  |
| 35(1) | 6(1)  | 2192.2 | 2108.4 | 0.0  |
| 35(1) | 7(1)  | 2054.5 | 1954.9 | 0.0  |
| 35(1) | 8(1)  | 2020.3 | 1926.4 | 0.0  |
| 35(1) | 9(1)  | 1938.8 | 1846.9 | 0.0  |
| 35(1) | 10(1) | 1873.2 | 1783.4 | 0.0  |
| 35(1) | 11(1) | 1768.4 | 1682.1 | 0.0  |
| 35(1) | 12(1) | 1750.9 | 1662.2 | 0.0  |
| 35(1) | 13(1) | 1742.6 | 1659.6 | 0.0  |
| 35(1) | 14(1) | 1678.3 | 1597.5 | 0.0  |
| 35(1) | 15(1) | 1605.0 | 1511.7 | 0.0  |
| 35(1) | 16(1) | 1596.8 | 1516.3 | 0.0  |
| 35(1) | 17(1) | 1578.2 | 1500.4 | 0.0  |
| 35(1) | 18(1) | 1543.6 | 1466.0 | 0.0  |
| 35(1) | 19(1) | 1470.0 | 1390.0 | 0.0  |
| 35(1) | 20(1) | 1389.9 | 1317.3 | 0.3  |
| 35(1) | 21(1) | 1387.6 | 1317.3 | 0.0  |
| 35(1) | 22(1) | 1253.1 | 1194.5 | 6.7  |
| 35(1) | 23(1) | 1249.5 | 1186.8 | 0.9  |
| 35(1) | 24(1) | 1182.4 | 1117.9 | 0.1  |
| 35(1) | 25(1) | 1154.0 | 1082.9 | 0.0  |
| 35(1) | 26(1) | 1138.5 | 1069.3 | 0.0  |
| 35(1) | 27(1) | 1100.1 | 1036.9 | 1.3  |
| 35(1) | 28(1) | 1043.6 | 975.6  | 4.4  |
| 35(1) | 29(1) | 996.9  | 933.2  | 0.0  |
| 35(1) | 30(1) | 987.2  | 926.4  | 0.0  |
| 35(1) | 31(1) | 971.5  | 888.7  | 0.0  |
| 35(1) | 32(1) | 920.5  | 860.5  | 0.0  |

|       |       |        |        |      |
|-------|-------|--------|--------|------|
| 35(1) | 33(1) | 859.8  | 798.4  | 0.0  |
| 35(1) | 34(1) | 803.8  | 745.6  | 0.2  |
| 36(1) | 1(1)  | 4177.7 | 3982.7 | 0.0  |
| 36(1) | 2(1)  | 4126.1 | 3938.0 | 0.0  |
| 36(1) | 3(1)  | 3588.6 | 3458.2 | 0.0  |
| 36(1) | 4(1)  | 3568.5 | 3440.0 | 0.0  |
| 36(1) | 5(1)  | 3550.0 | 3418.4 | 0.0  |
| 36(1) | 6(1)  | 2165.2 | 2130.5 | 0.2  |
| 36(1) | 7(1)  | 2027.5 | 1977.7 | 0.4  |
| 36(1) | 8(1)  | 1993.3 | 1950.7 | 0.0  |
| 36(1) | 9(1)  | 1911.8 | 1869.0 | 0.1  |
| 36(1) | 10(1) | 1846.2 | 1809.1 | 0.2  |
| 36(1) | 11(1) | 1741.5 | 1706.5 | 1.4  |
| 36(1) | 12(1) | 1723.9 | 1686.7 | 0.1  |
| 36(1) | 13(1) | 1715.6 | 1679.2 | 0.7  |
| 36(1) | 14(1) | 1651.3 | 1620.8 | 4.8  |
| 36(1) | 15(1) | 1578.0 | 1538.1 | 0.6  |
| 36(1) | 16(1) | 1569.8 | 1541.0 | 0.5  |
| 36(1) | 17(1) | 1551.2 | 1521.5 | 6.9  |
| 36(1) | 18(1) | 1516.6 | 1489.3 | 0.4  |
| 36(1) | 19(1) | 1443.0 | 1412.6 | 0.1  |
| 36(1) | 20(1) | 1363.0 | 1340.0 | 0.0  |
| 36(1) | 21(1) | 1360.6 | 1341.1 | 12.4 |
| 36(1) | 22(1) | 1226.1 | 1212.3 | 0.0  |
| 36(1) | 23(1) | 1222.6 | 1206.8 | 0.0  |
| 36(1) | 24(1) | 1155.4 | 1140.6 | 0.0  |
| 36(1) | 25(1) | 1127.0 | 1109.4 | 2.3  |
| 36(1) | 26(1) | 1111.5 | 1094.0 | 1.6  |
| 36(1) | 27(1) | 1073.1 | 1059.5 | 0.0  |
| 36(1) | 28(1) | 1016.6 | 1002.9 | 0.0  |
| 36(1) | 29(1) | 969.9  | 956.4  | 0.0  |
| 36(1) | 30(1) | 960.2  | 950.6  | 0.0  |
| 36(1) | 31(1) | 944.5  | 911.4  | 0.0  |
| 36(1) | 32(1) | 893.5  | 884.1  | 0.0  |
| 36(1) | 33(1) | 832.8  | 821.5  | 0.0  |
| 36(1) | 34(1) | 776.8  | 769.8  | 0.1  |
| 36(1) | 35(1) | 760.7  | 700.4  | 0.0  |
| 37(1) | 1(1)  | 4127.0 | 3932.0 | 0.0  |
| 37(1) | 2(1)  | 4075.4 | 3887.6 | 0.0  |
| 37(1) | 3(1)  | 3537.9 | 3408.1 | 0.0  |



|       |       |        |        |       |
|-------|-------|--------|--------|-------|
| 37(1) | 4(1)  | 3517.8 | 3389.8 | 0.0   |
| 37(1) | 5(1)  | 3499.3 | 3368.0 | 0.0   |
| 37(1) | 6(1)  | 2114.5 | 2081.2 | 0.1   |
| 37(1) | 7(1)  | 1976.8 | 1925.2 | 0.0   |
| 37(1) | 8(1)  | 1942.6 | 1899.5 | 0.0   |
| 37(1) | 9(1)  | 1861.1 | 1820.7 | 0.5   |
| 37(1) | 10(1) | 1795.5 | 1758.0 | 66.4  |
| 37(1) | 11(1) | 1690.8 | 1656.3 | 6.7   |
| 37(1) | 12(1) | 1673.2 | 1639.3 | 45.5  |
| 37(1) | 13(1) | 1664.9 | 1630.1 | 19.7  |
| 37(1) | 14(1) | 1600.6 | 1570.4 | 0.2   |
| 37(1) | 15(1) | 1527.3 | 1486.6 | 1.3   |
| 37(1) | 16(1) | 1519.1 | 1490.5 | 0.1   |
| 37(1) | 17(1) | 1500.5 | 1470.2 | 0.3   |
| 37(1) | 18(1) | 1465.9 | 1438.5 | 0.8   |
| 37(1) | 19(1) | 1392.3 | 1362.2 | 0.4   |
| 37(1) | 20(1) | 1312.3 | 1289.6 | 0.0   |
| 37(1) | 21(1) | 1309.9 | 1289.5 | 0.9   |
| 37(1) | 22(1) | 1175.4 | 1161.8 | 0.0   |
| 37(1) | 23(1) | 1171.8 | 1156.4 | 0.0   |
| 37(1) | 24(1) | 1104.7 | 1090.2 | 0.0   |
| 37(1) | 25(1) | 1076.3 | 1059.9 | 258.2 |
| 37(1) | 26(1) | 1060.8 | 1043.4 | 0.3   |
| 37(1) | 27(1) | 1022.4 | 1008.9 | 0.0   |
| 37(1) | 28(1) | 965.9  | 952.4  | 0.0   |
| 37(1) | 29(1) | 919.2  | 906.3  | 0.0   |
| 37(1) | 30(1) | 909.5  | 900.2  | 0.0   |
| 37(1) | 31(1) | 893.8  | 861.0  | 0.0   |
| 37(1) | 32(1) | 842.8  | 834.3  | 0.0   |
| 37(1) | 33(1) | 782.1  | 771.1  | 0.2   |
| 37(1) | 34(1) | 726.1  | 719.1  | 0.0   |
| 37(1) | 35(1) | 710.0  | 650.1  | 1.0   |
| 37(1) | 36(1) | 683.0  | 673.9  | 0.1   |
| 38(1) | 1(1)  | 4101.7 | 3907.0 | 0.0   |
| 38(1) | 2(1)  | 4050.1 | 3862.8 | 0.1   |
| 38(1) | 3(1)  | 3512.7 | 3383.0 | 0.0   |
| 38(1) | 4(1)  | 3492.5 | 3364.8 | 0.0   |
| 38(1) | 5(1)  | 3474.1 | 3343.3 | 0.0   |
| 38(1) | 6(1)  | 2089.2 | 2055.7 | 0.0   |
| 38(1) | 7(1)  | 1951.6 | 1902.8 | 0.0   |

|       |       |        |        |      |
|-------|-------|--------|--------|------|
| 38(1) | 8(1)  | 1917.4 | 1875.7 | 0.0  |
| 38(1) | 9(1)  | 1835.8 | 1795.2 | 0.0  |
| 38(1) | 10(1) | 1770.3 | 1734.0 | 0.0  |
| 38(1) | 11(1) | 1665.5 | 1630.8 | 0.0  |
| 38(1) | 12(1) | 1648.0 | 1612.4 | 0.0  |
| 38(1) | 13(1) | 1639.7 | 1605.3 | 0.0  |
| 38(1) | 14(1) | 1575.4 | 1545.6 | 0.0  |
| 38(1) | 15(1) | 1502.1 | 1462.5 | 0.0  |
| 38(1) | 16(1) | 1493.9 | 1465.7 | 0.0  |
| 38(1) | 17(1) | 1475.3 | 1445.5 | 0.0  |
| 38(1) | 18(1) | 1440.7 | 1414.4 | 0.0  |
| 38(1) | 19(1) | 1367.0 | 1337.6 | 0.0  |
| 38(1) | 20(1) | 1287.0 | 1267.3 | 0.5  |
| 38(1) | 21(1) | 1284.7 | 1264.7 | 0.0  |
| 38(1) | 22(1) | 1150.1 | 1137.2 | 0.0  |
| 38(1) | 23(1) | 1146.6 | 1130.3 | 29.3 |
| 38(1) | 24(1) | 1079.5 | 1065.8 | 0.8  |
| 38(1) | 25(1) | 1051.1 | 1035.1 | 0.0  |
| 38(1) | 26(1) | 1035.6 | 1017.4 | 0.0  |
| 38(1) | 27(1) | 997.2  | 984.7  | 3.2  |
| 38(1) | 28(1) | 940.6  | 927.9  | 0.1  |
| 38(1) | 29(1) | 894.0  | 881.9  | 0.0  |
| 38(1) | 30(1) | 884.3  | 875.9  | 0.0  |
| 38(1) | 31(1) | 868.5  | 835.9  | 0.1  |
| 38(1) | 32(1) | 817.5  | 808.8  | 0.1  |
| 38(1) | 33(1) | 756.9  | 748.0  | 0.3  |
| 38(1) | 34(1) | 700.8  | 695.4  | 0.0  |
| 38(1) | 35(1) | 684.8  | 626.2  | 0.4  |
| 38(1) | 36(1) | 657.8  | 648.5  | 0.0  |
| 38(1) | 37(1) | 607.1  | 598.3  | 0.0  |
| 39(1) | 1(1)  | 4037.3 | 3841.3 | 0.0  |
| 39(1) | 2(1)  | 3985.7 | 3796.9 | 0.0  |
| 39(1) | 3(1)  | 3448.2 | 3316.9 | 0.0  |
| 39(1) | 4(1)  | 3428.1 | 3298.8 | 0.0  |
| 39(1) | 5(1)  | 3409.6 | 3277.1 | 0.0  |
| 39(1) | 6(1)  | 2024.8 | 1989.8 | 0.0  |
| 39(1) | 7(1)  | 1887.1 | 1836.7 | 0.0  |
| 39(1) | 8(1)  | 1852.9 | 1809.7 | 0.0  |
| 39(1) | 9(1)  | 1771.4 | 1729.2 | 0.0  |
| 39(1) | 10(1) | 1705.8 | 1668.0 | 0.1  |

|       |       |        |        |      |
|-------|-------|--------|--------|------|
| 39(1) | 11(1) | 1601.1 | 1564.7 | 0.0  |
| 39(1) | 12(1) | 1583.5 | 1546.1 | 0.1  |
| 39(1) | 13(1) | 1575.2 | 1539.1 | 0.0  |
| 39(1) | 14(1) | 1510.9 | 1479.7 | 0.0  |
| 39(1) | 15(1) | 1437.6 | 1396.3 | 0.0  |
| 39(1) | 16(1) | 1429.4 | 1399.4 | 0.0  |
| 39(1) | 17(1) | 1410.8 | 1379.3 | 0.0  |
| 39(1) | 18(1) | 1376.2 | 1347.7 | 0.0  |
| 39(1) | 19(1) | 1302.6 | 1271.5 | 0.0  |
| 39(1) | 20(1) | 1222.6 | 1198.8 | 0.9  |
| 39(1) | 21(1) | 1220.2 | 1199.0 | 0.0  |
| 39(1) | 22(1) | 1085.7 | 1071.1 | 1.9  |
| 39(1) | 23(1) | 1082.2 | 1065.7 | 2.1  |
| 39(1) | 24(1) | 1015.0 | 999.5  | 0.1  |
| 39(1) | 25(1) | 986.6  | 969.0  | 0.0  |
| 39(1) | 26(1) | 971.1  | 952.9  | 0.0  |
| 39(1) | 27(1) | 932.7  | 918.3  | 0.1  |
| 39(1) | 28(1) | 876.2  | 861.2  | 0.0  |
| 39(1) | 29(1) | 829.5  | 815.9  | 0.0  |
| 39(1) | 30(1) | 819.8  | 809.6  | 0.1  |
| 39(1) | 31(1) | 804.1  | 770.2  | 0.0  |
| 39(1) | 32(1) | 753.1  | 744.2  | 0.0  |
| 39(1) | 33(1) | 692.4  | 680.1  | 0.0  |
| 39(1) | 34(1) | 636.4  | 627.8  | 0.0  |
| 39(1) | 35(1) | 620.3  | 558.8  | 0.1  |
| 39(1) | 36(1) | 593.3  | 583.0  | 0.1  |
| 39(1) | 37(1) | 542.6  | 532.3  | 0.0  |
| 39(1) | 38(1) | 517.4  | 507.8  | 0.2  |
| 40(1) | 1(1)  | 4008.4 | 3815.0 | 0.0  |
| 40(1) | 2(1)  | 3956.8 | 3770.6 | 0.1  |
| 40(1) | 3(1)  | 3419.3 | 3291.5 | 0.0  |
| 40(1) | 4(1)  | 3399.2 | 3272.8 | 0.0  |
| 40(1) | 5(1)  | 3380.8 | 3251.1 | 0.0  |
| 40(1) | 6(1)  | 1995.9 | 1963.3 | 0.3  |
| 40(1) | 7(1)  | 1858.2 | 1810.6 | 0.0  |
| 40(1) | 8(1)  | 1824.0 | 1783.9 | 1.2  |
| 40(1) | 9(1)  | 1742.5 | 1702.5 | 0.2  |
| 40(1) | 10(1) | 1676.9 | 1642.3 | 12.4 |
| 40(1) | 11(1) | 1572.2 | 1538.2 | 0.6  |
| 40(1) | 12(1) | 1554.6 | 1520.0 | 0.4  |

|       |       |        |        |      |
|-------|-------|--------|--------|------|
| 40(1) | 13(1) | 1546.3 | 1513.6 | 13.6 |
| 40(1) | 14(1) | 1482.0 | 1453.7 | 4.1  |
| 40(1) | 15(1) | 1408.7 | 1370.4 | 0.0  |
| 40(1) | 16(1) | 1400.5 | 1373.9 | 0.0  |
| 40(1) | 17(1) | 1381.9 | 1353.1 | 0.3  |
| 40(1) | 18(1) | 1347.4 | 1321.2 | 15.4 |
| 40(1) | 19(1) | 1273.7 | 1245.0 | 0.2  |
| 40(1) | 20(1) | 1193.7 | 1172.9 | 0.0  |
| 40(1) | 21(1) | 1191.3 | 1173.0 | 4.5  |
| 40(1) | 22(1) | 1056.8 | 1045.1 | 0.0  |
| 40(1) | 23(1) | 1053.3 | 1039.8 | 0.0  |
| 40(1) | 24(1) | 986.1  | 973.4  | 0.0  |
| 40(1) | 25(1) | 957.7  | 942.4  | 0.0  |
| 40(1) | 26(1) | 942.2  | 926.4  | 0.0  |
| 40(1) | 27(1) | 903.8  | 892.6  | 0.0  |
| 40(1) | 28(1) | 847.3  | 835.6  | 0.0  |
| 40(1) | 29(1) | 800.7  | 788.5  | 0.0  |
| 40(1) | 30(1) | 790.9  | 783.2  | 0.0  |
| 40(1) | 31(1) | 775.2  | 744.4  | 0.0  |
| 40(1) | 32(1) | 724.2  | 716.8  | 0.0  |
| 40(1) | 33(1) | 663.6  | 654.1  | 0.0  |
| 40(1) | 34(1) | 607.5  | 603.3  | 6.7  |
| 40(1) | 35(1) | 591.4  | 532.3  | 0.0  |
| 40(1) | 36(1) | 564.4  | 556.9  | 0.0  |
| 40(1) | 37(1) | 513.7  | 506.0  | 0.1  |
| 40(1) | 38(1) | 488.5  | 482.6  | 0.1  |
| 40(1) | 39(1) | 424.0  | 415.5  | 0.0  |
| 41(1) | 1(1)  | 3909.9 | 3716.4 | 0.1  |
| 41(1) | 2(1)  | 3858.4 | 3672.0 | 0.1  |
| 41(1) | 3(1)  | 3320.9 | 3192.0 | 0.0  |
| 41(1) | 4(1)  | 3300.7 | 3174.2 | 0.0  |
| 41(1) | 5(1)  | 3282.3 | 3152.5 | 0.0  |
| 41(1) | 6(1)  | 1897.5 | 1865.1 | 0.0  |
| 41(1) | 7(1)  | 1759.8 | 1712.3 | 0.1  |
| 41(1) | 8(1)  | 1725.6 | 1685.4 | 0.0  |
| 41(1) | 9(1)  | 1644.0 | 1604.7 | 0.1  |
| 41(1) | 10(1) | 1578.5 | 1543.5 | 0.0  |
| 41(1) | 11(1) | 1473.7 | 1440.1 | 0.0  |
| 41(1) | 12(1) | 1456.2 | 1421.6 | 0.0  |
| 41(1) | 13(1) | 1447.9 | 1414.7 | 0.0  |

|       |       |        |        |     |
|-------|-------|--------|--------|-----|
| 41(1) | 14(1) | 1383.6 | 1355.0 | 0.0 |
| 41(1) | 15(1) | 1310.3 | 1271.8 | 0.3 |
| 41(1) | 16(1) | 1302.1 | 1275.0 | 0.0 |
| 41(1) | 17(1) | 1283.5 | 1254.7 | 0.0 |
| 41(1) | 18(1) | 1248.9 | 1223.2 | 0.0 |
| 41(1) | 19(1) | 1175.3 | 1147.0 | 0.1 |
| 41(1) | 20(1) | 1095.2 | 1074.1 | 0.6 |
| 41(1) | 21(1) | 1092.9 | 1074.5 | 0.0 |
| 41(1) | 22(1) | 958.3  | 946.2  | 0.3 |
| 41(1) | 23(1) | 954.8  | 940.9  | 0.1 |
| 41(1) | 24(1) | 887.7  | 874.8  | 0.1 |
| 41(1) | 25(1) | 859.3  | 843.9  | 0.0 |
| 41(1) | 26(1) | 843.8  | 828.0  | 0.0 |
| 41(1) | 27(1) | 805.4  | 793.8  | 0.0 |
| 41(1) | 28(1) | 748.9  | 736.7  | 0.2 |
| 41(1) | 29(1) | 702.2  | 690.7  | 0.0 |
| 41(1) | 30(1) | 692.5  | 684.6  | 0.1 |
| 41(1) | 31(1) | 676.8  | 645.5  | 0.0 |
| 41(1) | 32(1) | 625.8  | 618.0  | 0.0 |
| 41(1) | 33(1) | 565.1  | 555.4  | 0.1 |
| 41(1) | 34(1) | 509.1  | 503.7  | 0.0 |
| 41(1) | 35(1) | 493.0  | 433.5  | 0.2 |
| 41(1) | 36(1) | 466.0  | 457.9  | 0.0 |
| 41(1) | 37(1) | 415.3  | 408.3  | 0.0 |
| 41(1) | 38(1) | 390.0  | 383.6  | 0.0 |
| 41(1) | 39(1) | 325.6  | 316.8  | 0.0 |
| 41(1) | 40(1) | 296.7  | 290.5  | 0.0 |
| 42(1) | 1(1)  | 3851.7 | 3661.9 | 0.0 |
| 42(1) | 2(1)  | 3800.1 | 3616.3 | 0.0 |
| 42(1) | 3(1)  | 3262.7 | 3137.0 | 0.0 |
| 42(1) | 4(1)  | 3242.5 | 3119.9 | 0.0 |
| 42(1) | 5(1)  | 3224.1 | 3098.1 | 0.0 |
| 42(1) | 6(1)  | 1839.2 | 1811.2 | 2.0 |
| 42(1) | 7(1)  | 1701.6 | 1658.4 | 0.0 |
| 42(1) | 8(1)  | 1667.4 | 1631.3 | 0.1 |
| 42(1) | 9(1)  | 1585.8 | 1550.5 | 0.0 |
| 42(1) | 10(1) | 1520.3 | 1489.1 | 0.0 |
| 42(1) | 11(1) | 1415.5 | 1385.8 | 0.1 |
| 42(1) | 12(1) | 1398.0 | 1367.0 | 0.1 |
| 42(1) | 13(1) | 1389.7 | 1360.2 | 0.0 |

|       |       |        |        |     |
|-------|-------|--------|--------|-----|
| 42(1) | 14(1) | 1325.4 | 1300.5 | 0.1 |
| 42(1) | 15(1) | 1252.1 | 1217.7 | 0.1 |
| 42(1) | 16(1) | 1243.9 | 1220.5 | 0.2 |
| 42(1) | 17(1) | 1225.3 | 1201.1 | 0.1 |
| 42(1) | 18(1) | 1190.7 | 1168.8 | 0.3 |
| 42(1) | 19(1) | 1117.0 | 1092.5 | 0.6 |
| 42(1) | 20(1) | 1037.0 | 1019.8 | 0.4 |
| 42(1) | 21(1) | 1034.6 | 1020.2 | 0.0 |
| 42(1) | 22(1) | 900.1  | 892.2  | 0.1 |
| 42(1) | 23(1) | 896.6  | 886.8  | 0.0 |
| 42(1) | 24(1) | 829.5  | 820.8  | 0.2 |
| 42(1) | 25(1) | 801.1  | 790.8  | 0.0 |
| 42(1) | 26(1) | 785.5  | 773.6  | 0.0 |
| 42(1) | 27(1) | 747.2  | 740.5  | 0.1 |
| 42(1) | 28(1) | 690.6  | 683.8  | 0.0 |
| 42(1) | 29(1) | 644.0  | 634.1  | 1.3 |
| 42(1) | 30(1) | 634.2  | 631.4  | 0.1 |
| 42(1) | 31(1) | 618.5  | 589.9  | 2.1 |
| 42(1) | 32(1) | 567.5  | 563.9  | 0.0 |
| 42(1) | 33(1) | 506.9  | 502.1  | 0.1 |
| 42(1) | 34(1) | 450.8  | 451.0  | 0.2 |
| 42(1) | 35(1) | 434.7  | 376.1  | 0.0 |
| 42(1) | 36(1) | 407.8  | 404.4  | 0.0 |
| 42(1) | 37(1) | 357.1  | 353.0  | 0.0 |
| 42(1) | 38(1) | 331.8  | 327.4  | 0.0 |
| 42(1) | 39(1) | 267.4  | 260.3  | 0.0 |
| 42(1) | 40(1) | 238.5  | 235.6  | 0.0 |
| 42(1) | 41(1) | 140.0  | 138.7  | 0.0 |

**Table S15.** Harmonic and anharmonic vibrational frequencies and their intensities of conformer **C1** as computed at the B3LYP/cc-pVTZ level of theory.

| Mode (quanta) | $\nu_{\text{harm}}$<br>( $\text{cm}^{-1}$ ) | $\nu_{\text{anharm}}$<br>( $\text{cm}^{-1}$ ) | $I_{\text{harm}}$<br>( $\text{km mol}^{-1}$ ) | $I_{\text{anharm}}$<br>( $\text{km mol}^{-1}$ ) |
|---------------|---------------------------------------------|-----------------------------------------------|-----------------------------------------------|-------------------------------------------------|
| 1(1)          | 3811.9                                      | 3631.4                                        | 90.1                                          | 75.7                                            |
| 2(1)          | 3757.7                                      | 3577.3                                        | 112.1                                         | 98.3                                            |
| 3(1)          | 3211.7                                      | 3088.9                                        | 3.1                                           | 1.1                                             |
| 4(1)          | 3199.3                                      | 3069.5                                        | 0.5                                           | 0.6                                             |
| 5(1)          | 3186.4                                      | 3052.1                                        | 1.4                                           | 3.0                                             |
| 6(1)          | 1813.9                                      | 1778.4                                        | 323.6                                         | 228.3                                           |
| 7(1)          | 1666.0                                      | 1624.3                                        | 259.2                                         | 195.6                                           |
| 8(1)          | 1621.6                                      | 1585.0                                        | 92.7                                          | 63.0                                            |
| 9(1)          | 1537.8                                      | 1503.4                                        | 42.8                                          | 33.4                                            |
| 10(1)         | 1481.1                                      | 1444.7                                        | 34.6                                          | 27.1                                            |
| 11(1)         | 1364.9                                      | 1336.3                                        | 24.7                                          | 124.9                                           |
| 12(1)         | 1359.5                                      | 1301.3                                        | 572.9                                         | 242.7                                           |
| 13(1)         | 1342.6                                      | 1309.6                                        | 19.4                                          | 14.9                                            |
| 14(1)         | 1270.1                                      | 1243.7                                        | 133.8                                         | 100.5                                           |
| 15(1)         | 1236.7                                      | 1211.1                                        | 18.2                                          | 6.7                                             |
| 16(1)         | 1192.8                                      | 1163.8                                        | 260.9                                         | 224.7                                           |
| 17(1)         | 1171.6                                      | 1153.3                                        | 22.1                                          | 15.3                                            |
| 18(1)         | 1136.7                                      | 1118.2                                        | 53.5                                          | 51.5                                            |
| 19(1)         | 1088.9                                      | 1081.9                                        | 5.3                                           | 3.2                                             |
| 20(1)         | 1013.0                                      | 991.1                                         | 0.5                                           | 0.2                                             |
| 21(1)         | 983.8                                       | 967.5                                         | 24.4                                          | 12.0                                            |
| 22(1)         | 867.6                                       | 854.9                                         | 29.6                                          | 35.6                                            |
| 23(1)         | 843.9                                       | 843.9                                         | 27.3                                          | 19.8                                            |
| 24(1)         | 776.8                                       | 773.2                                         | 7.5                                           | 5.8                                             |
| 25(1)         | 767.1                                       | 753.3                                         | 14.2                                          | 12.8                                            |
| 26(1)         | 752.8                                       | 739.6                                         | 3.3                                           | 6.7                                             |
| 27(1)         | 692.3                                       | 690.5                                         | 6.7                                           | 4.5                                             |
| 28(1)         | 639.8                                       | 629.5                                         | 11.2                                          | 5.4                                             |
| 29(1)         | 621.2                                       | 614.3                                         | 7.6                                           | 6.9                                             |
| 30(1)         | 588.9                                       | 582.8                                         | 11.8                                          | 11.8                                            |
| 31(1)         | 564.9                                       | 545.3                                         | 87.0                                          | 90.2                                            |
| 32(1)         | 526.6                                       | 522.0                                         | 4.3                                           | 3.8                                             |
| 33(1)         | 470.3                                       | 463.5                                         | 4.2                                           | 3.2                                             |
| 34(1)         | 416.1                                       | 413.7                                         | 19.5                                          | 17.4                                            |
| 35(1)         | 386.5                                       | 356.7                                         | 98.5                                          | 94.3                                            |
| 36(1)         | 364.5                                       | 361.8                                         | 0.7                                           | 0.8                                             |
| 37(1)         | 332.9                                       | 329.5                                         | 8.1                                           | 7.2                                             |

|       |        |        |     |      |
|-------|--------|--------|-----|------|
| 38(1) | 293.9  | 292.7  | 5.0 | 5.6  |
| 39(1) | 229.2  | 225.3  | 0.4 | 0.5  |
| 40(1) | 220.6  | 216.8  | 5.8 | 5.6  |
| 41(1) | 100.6  | 103.0  | 0.8 | 0.6  |
| 42(1) | 63.8   | 69.1   | 2.8 | 2.7  |
| 1(2)  | 7623.7 | 7096.6 |     | 6.2  |
| 2(2)  | 7515.3 | 6976.9 |     | 2.1  |
| 3(2)  | 6423.3 | 6120.9 |     | 0.3  |
| 4(2)  | 6398.7 | 6092.7 |     | 0.8  |
| 5(2)  | 6372.8 | 6014.0 |     | 0.6  |
| 6(2)  | 3627.9 | 3538.6 |     | 4.9  |
| 7(2)  | 3332.0 | 3245.6 |     | 0.3  |
| 8(2)  | 3243.1 | 3166.5 |     | 1.4  |
| 9(2)  | 3075.6 | 3000.7 |     | 0.1  |
| 10(2) | 2962.2 | 2893.3 |     | 0.1  |
| 11(2) | 2729.8 | 2671.2 |     | 2.0  |
| 12(2) | 2719.1 | 2616.6 |     | 0.8  |
| 13(2) | 2685.2 | 2621.6 |     | 0.1  |
| 14(2) | 2540.2 | 2485.0 |     | 0.1  |
| 15(2) | 2473.4 | 2419.0 |     | 0.3  |
| 16(2) | 2385.7 | 2319.4 |     | 1.3  |
| 17(2) | 2343.1 | 2304.0 |     | 0.1  |
| 18(2) | 2273.4 | 2231.9 |     | 0.5  |
| 19(2) | 2177.8 | 2131.1 |     | 0.7  |
| 20(2) | 2026.1 | 1977.1 |     | 2.3  |
| 21(2) | 1967.5 | 1933.7 |     | 0.4  |
| 22(2) | 1735.1 | 1709.4 |     | 0.8  |
| 23(2) | 1687.7 | 1692.8 |     | 0.7  |
| 24(2) | 1553.5 | 1547.3 |     | 0.8  |
| 25(2) | 1534.1 | 1512.4 |     | 0.9  |
| 26(2) | 1505.7 | 1478.8 |     | 0.3  |
| 27(2) | 1384.5 | 1382.9 |     | 0.4  |
| 28(2) | 1279.6 | 1259.1 |     | 4.1  |
| 29(2) | 1242.4 | 1228.9 |     | 0.3  |
| 30(2) | 1177.8 | 1166.4 |     | 1.0  |
| 31(2) | 1129.9 | 1045.6 |     | 11.3 |
| 32(2) | 1053.2 | 1043.6 |     | 0.2  |
| 33(2) | 940.6  | 927.2  |     | 0.4  |
| 34(2) | 832.2  | 827.6  |     | 0.1  |
| 35(2) | 773.0  | 688.7  |     | 5.3  |



|       |      |        |        |     |
|-------|------|--------|--------|-----|
| 36(2) |      | 728.9  | 723.5  | 0.1 |
| 37(2) |      | 665.8  | 658.9  | 0.0 |
| 38(2) |      | 587.7  | 586.6  | 0.0 |
| 39(2) |      | 458.4  | 450.3  | 0.2 |
| 40(2) |      | 441.2  | 434.0  | 0.1 |
| 41(2) |      | 201.2  | 205.7  | 0.1 |
| 42(2) |      | 127.5  | 140.3  | 0.0 |
| 2(1)  | 1(1) | 7569.5 | 7208.7 | 0.0 |
| 3(1)  | 1(1) | 7023.5 | 6720.2 | 0.0 |
| 3(1)  | 2(1) | 6969.3 | 6666.0 | 0.0 |
| 4(1)  | 1(1) | 7011.2 | 6706.1 | 0.0 |
| 4(1)  | 2(1) | 6957.0 | 6652.0 | 0.0 |
| 4(1)  | 3(1) | 6411.0 | 6057.6 | 0.3 |
| 5(1)  | 1(1) | 6998.3 | 6692.9 | 0.0 |
| 5(1)  | 2(1) | 6944.1 | 6639.9 | 0.0 |
| 5(1)  | 3(1) | 6398.1 | 6151.1 | 0.0 |
| 5(1)  | 4(1) | 6385.7 | 6137.0 | 0.0 |
| 6(1)  | 1(1) | 5625.8 | 5409.7 | 0.0 |
| 6(1)  | 2(1) | 5571.6 | 5352.5 | 0.1 |
| 6(1)  | 3(1) | 5025.6 | 4867.7 | 0.1 |
| 6(1)  | 4(1) | 5013.3 | 4853.6 | 0.0 |
| 6(1)  | 5(1) | 5000.3 | 4841.2 | 0.0 |
| 7(1)  | 1(1) | 5477.9 | 5254.9 | 0.0 |
| 7(1)  | 2(1) | 5423.7 | 5202.4 | 0.0 |
| 7(1)  | 3(1) | 4877.7 | 4717.0 | 0.1 |
| 7(1)  | 4(1) | 4865.3 | 4703.8 | 0.0 |
| 7(1)  | 5(1) | 4852.4 | 4689.3 | 0.1 |
| 7(1)  | 6(1) | 3479.9 | 3402.7 | 0.0 |
| 8(1)  | 1(1) | 5433.4 | 5215.2 | 0.7 |
| 8(1)  | 2(1) | 5379.2 | 5162.0 | 0.0 |
| 8(1)  | 3(1) | 4833.2 | 4674.6 | 0.1 |
| 8(1)  | 4(1) | 4820.9 | 4658.5 | 0.2 |
| 8(1)  | 5(1) | 4808.0 | 4646.5 | 0.2 |
| 8(1)  | 6(1) | 3435.5 | 3362.7 | 0.1 |
| 8(1)  | 7(1) | 3287.6 | 3209.6 | 0.4 |
| 9(1)  | 1(1) | 5349.7 | 5133.3 | 0.1 |
| 9(1)  | 2(1) | 5295.5 | 5080.8 | 0.0 |
| 9(1)  | 3(1) | 4749.5 | 4598.7 | 0.0 |
| 9(1)  | 4(1) | 4737.1 | 4578.8 | 0.1 |
| 9(1)  | 5(1) | 4724.2 | 4566.7 | 0.0 |

|       |       |        |        |     |
|-------|-------|--------|--------|-----|
| 9(1)  | 6(1)  | 3351.7 | 3281.7 | 0.0 |
| 9(1)  | 7(1)  | 3203.8 | 3130.3 | 0.9 |
| 9(1)  | 8(1)  | 3159.4 | 3085.7 | 0.3 |
| 10(1) | 1(1)  | 5293.0 | 5079.7 | 0.4 |
| 10(1) | 2(1)  | 5238.8 | 5025.7 | 0.0 |
| 10(1) | 3(1)  | 4692.8 | 4540.4 | 0.1 |
| 10(1) | 4(1)  | 4680.4 | 4528.5 | 0.0 |
| 10(1) | 5(1)  | 4667.5 | 4515.9 | 0.1 |
| 10(1) | 6(1)  | 3295.0 | 3227.1 | 0.1 |
| 10(1) | 7(1)  | 3147.1 | 3055.5 | 0.2 |
| 10(1) | 8(1)  | 3102.7 | 3029.7 | 0.0 |
| 10(1) | 9(1)  | 3018.9 | 2948.6 | 0.1 |
| 11(1) | 1(1)  | 5176.8 | 4966.3 | 0.4 |
| 11(1) | 2(1)  | 5122.6 | 4913.8 | 0.1 |
| 11(1) | 3(1)  | 4576.6 | 4427.7 | 0.0 |
| 11(1) | 4(1)  | 4564.2 | 4412.9 | 0.0 |
| 11(1) | 5(1)  | 4551.3 | 4400.7 | 0.0 |
| 11(1) | 6(1)  | 3178.9 | 3114.0 | 0.0 |
| 11(1) | 7(1)  | 3030.9 | 2952.0 | 0.1 |
| 11(1) | 8(1)  | 2986.5 | 2913.3 | 0.1 |
| 11(1) | 9(1)  | 2902.7 | 2834.6 | 1.4 |
| 11(1) | 10(1) | 2846.0 | 2780.6 | 0.7 |
| 12(1) | 1(1)  | 5171.4 | 4948.5 | 0.1 |
| 12(1) | 2(1)  | 5117.2 | 4898.8 | 1.2 |
| 12(1) | 3(1)  | 4571.2 | 4406.0 | 0.0 |
| 12(1) | 4(1)  | 4558.9 | 4391.9 | 0.0 |
| 12(1) | 5(1)  | 4545.9 | 4379.7 | 0.0 |
| 12(1) | 6(1)  | 3173.5 | 3091.5 | 0.1 |
| 12(1) | 7(1)  | 3025.5 | 2940.7 | 0.3 |
| 12(1) | 8(1)  | 2981.1 | 2901.7 | 0.0 |
| 12(1) | 9(1)  | 2897.3 | 2819.7 | 0.1 |
| 12(1) | 10(1) | 2840.6 | 2765.5 | 0.1 |
| 12(1) | 11(1) | 2724.4 | 2650.9 | 0.0 |
| 13(1) | 1(1)  | 5154.4 | 4939.7 | 0.2 |
| 13(1) | 2(1)  | 5100.3 | 4889.5 | 0.0 |
| 13(1) | 3(1)  | 4554.2 | 4398.3 | 0.2 |
| 13(1) | 4(1)  | 4541.9 | 4386.5 | 0.1 |
| 13(1) | 5(1)  | 4529.0 | 4375.2 | 0.2 |
| 13(1) | 6(1)  | 3156.5 | 3090.7 | 0.0 |
| 13(1) | 7(1)  | 3008.6 | 2932.2 | 0.0 |

|       |       |        |        |     |
|-------|-------|--------|--------|-----|
| 13(1) | 8(1)  | 2964.2 | 2895.6 | 0.1 |
| 13(1) | 9(1)  | 2880.4 | 2811.8 | 0.4 |
| 13(1) | 10(1) | 2823.7 | 2757.5 | 0.3 |
| 13(1) | 11(1) | 2707.5 | 2645.7 | 0.2 |
| 13(1) | 12(1) | 2702.1 | 2629.2 | 0.1 |
| 14(1) | 1(1)  | 5082.0 | 4875.1 | 0.2 |
| 14(1) | 2(1)  | 5027.8 | 4819.3 | 0.3 |
| 14(1) | 3(1)  | 4481.8 | 4329.5 | 0.0 |
| 14(1) | 4(1)  | 4469.5 | 4316.4 | 0.1 |
| 14(1) | 5(1)  | 4456.5 | 4302.2 | 0.1 |
| 14(1) | 6(1)  | 3084.1 | 3021.1 | 0.0 |
| 14(1) | 7(1)  | 2936.1 | 2864.9 | 0.3 |
| 14(1) | 8(1)  | 2891.7 | 2825.8 | 0.0 |
| 14(1) | 9(1)  | 2807.9 | 2743.7 | 0.3 |
| 14(1) | 10(1) | 2751.2 | 2689.7 | 0.1 |
| 14(1) | 11(1) | 2635.0 | 2577.3 | 0.3 |
| 14(1) | 12(1) | 2629.6 | 2558.7 | 0.6 |
| 14(1) | 13(1) | 2612.7 | 2553.6 | 0.8 |
| 15(1) | 1(1)  | 5048.6 | 4842.4 | 0.0 |
| 15(1) | 2(1)  | 4994.4 | 4784.6 | 1.0 |
| 15(1) | 3(1)  | 4448.3 | 4297.5 | 0.0 |
| 15(1) | 4(1)  | 4436.0 | 4283.5 | 0.1 |
| 15(1) | 5(1)  | 4423.1 | 4272.6 | 0.0 |
| 15(1) | 6(1)  | 3050.6 | 2983.2 | 0.1 |
| 15(1) | 7(1)  | 2902.7 | 2833.5 | 0.1 |
| 15(1) | 8(1)  | 2858.3 | 2795.5 | 0.0 |
| 15(1) | 9(1)  | 2774.5 | 2713.0 | 0.3 |
| 15(1) | 10(1) | 2717.8 | 2658.4 | 0.0 |
| 15(1) | 11(1) | 2601.6 | 2545.4 | 0.2 |
| 15(1) | 12(1) | 2596.2 | 2516.8 | 2.0 |
| 15(1) | 13(1) | 2579.3 | 2522.7 | 0.0 |
| 15(1) | 14(1) | 2506.8 | 2453.1 | 0.6 |
| 16(1) | 1(1)  | 5004.7 | 4789.6 | 1.1 |
| 16(1) | 2(1)  | 4950.5 | 4740.9 | 0.0 |
| 16(1) | 3(1)  | 4404.5 | 4250.9 | 0.0 |
| 16(1) | 4(1)  | 4392.2 | 4237.0 | 0.0 |
| 16(1) | 5(1)  | 4379.2 | 4226.0 | 0.0 |
| 16(1) | 6(1)  | 3006.8 | 2942.2 | 0.0 |
| 16(1) | 7(1)  | 2858.8 | 2786.6 | 0.1 |
| 16(1) | 8(1)  | 2814.4 | 2744.1 | 0.2 |

|       |       |        |        |     |
|-------|-------|--------|--------|-----|
| 16(1) | 9(1)  | 2730.6 | 2665.6 | 0.4 |
| 16(1) | 10(1) | 2673.9 | 2608.9 | 0.4 |
| 16(1) | 11(1) | 2557.7 | 2495.7 | 0.7 |
| 16(1) | 12(1) | 2552.4 | 2480.6 | 0.0 |
| 16(1) | 13(1) | 2535.4 | 2472.9 | 2.6 |
| 16(1) | 14(1) | 2462.9 | 2405.8 | 0.4 |
| 16(1) | 15(1) | 2429.5 | 2374.5 | 0.2 |
| 17(1) | 1(1)  | 4983.4 | 4783.9 | 0.0 |
| 17(1) | 2(1)  | 4929.2 | 4728.4 | 0.2 |
| 17(1) | 3(1)  | 4383.2 | 4239.3 | 0.1 |
| 17(1) | 4(1)  | 4370.9 | 4225.8 | 0.0 |
| 17(1) | 5(1)  | 4358.0 | 4209.1 | 0.0 |
| 17(1) | 6(1)  | 2985.5 | 2931.3 | 0.0 |
| 17(1) | 7(1)  | 2837.6 | 2775.1 | 0.1 |
| 17(1) | 8(1)  | 2793.1 | 2735.7 | 0.1 |
| 17(1) | 9(1)  | 2709.4 | 2653.9 | 0.3 |
| 17(1) | 10(1) | 2652.7 | 2599.3 | 0.0 |
| 17(1) | 11(1) | 2536.5 | 2488.1 | 0.2 |
| 17(1) | 12(1) | 2531.1 | 2469.6 | 0.1 |
| 17(1) | 13(1) | 2514.1 | 2463.1 | 0.2 |
| 17(1) | 14(1) | 2441.7 | 2393.9 | 0.4 |
| 17(1) | 15(1) | 2408.2 | 2363.7 | 0.7 |
| 17(1) | 16(1) | 2364.4 | 2315.7 | 0.5 |
| 18(1) | 1(1)  | 4948.6 | 4747.4 | 0.0 |
| 18(1) | 2(1)  | 4894.4 | 4693.0 | 0.2 |
| 18(1) | 3(1)  | 4348.4 | 4201.1 | 0.0 |
| 18(1) | 4(1)  | 4336.1 | 4185.7 | 0.1 |
| 18(1) | 5(1)  | 4323.1 | 4177.7 | 0.1 |
| 18(1) | 6(1)  | 2950.7 | 2893.5 | 0.1 |
| 18(1) | 7(1)  | 2802.7 | 2737.7 | 0.2 |
| 18(1) | 8(1)  | 2758.3 | 2698.3 | 0.0 |
| 18(1) | 9(1)  | 2674.5 | 2617.9 | 0.0 |
| 18(1) | 10(1) | 2617.8 | 2562.9 | 0.2 |
| 18(1) | 11(1) | 2501.6 | 2450.9 | 0.1 |
| 18(1) | 12(1) | 2496.2 | 2431.5 | 0.8 |
| 18(1) | 13(1) | 2479.3 | 2426.8 | 0.0 |
| 18(1) | 14(1) | 2406.8 | 2358.9 | 0.2 |
| 18(1) | 15(1) | 2373.4 | 2326.1 | 0.0 |
| 18(1) | 16(1) | 2329.5 | 2279.1 | 0.4 |
| 18(1) | 17(1) | 2308.3 | 2269.8 | 0.2 |

|       |       |        |        |     |
|-------|-------|--------|--------|-----|
| 19(1) | 1(1)  | 4900.8 | 4697.7 | 0.0 |
| 19(1) | 2(1)  | 4846.6 | 4641.7 | 0.2 |
| 19(1) | 3(1)  | 4300.6 | 4154.8 | 0.1 |
| 19(1) | 4(1)  | 4288.2 | 4140.6 | 0.1 |
| 19(1) | 5(1)  | 4275.3 | 4128.4 | 0.3 |
| 19(1) | 6(1)  | 2902.8 | 2843.4 | 0.3 |
| 19(1) | 7(1)  | 2754.9 | 2688.8 | 0.0 |
| 19(1) | 8(1)  | 2710.5 | 2651.8 | 0.0 |
| 19(1) | 9(1)  | 2626.7 | 2568.7 | 0.1 |
| 19(1) | 10(1) | 2570.0 | 2513.7 | 0.2 |
| 19(1) | 11(1) | 2453.8 | 2400.7 | 0.1 |
| 19(1) | 12(1) | 2448.4 | 2381.1 | 1.6 |
| 19(1) | 13(1) | 2431.5 | 2377.8 | 0.3 |
| 19(1) | 14(1) | 2359.0 | 2309.0 | 0.2 |
| 19(1) | 15(1) | 2325.6 | 2274.8 | 0.4 |
| 19(1) | 16(1) | 2281.7 | 2229.6 | 0.1 |
| 19(1) | 17(1) | 2260.5 | 2218.1 | 0.2 |
| 19(1) | 18(1) | 2225.6 | 2180.9 | 0.2 |
| 20(1) | 1(1)  | 4824.9 | 4622.4 | 0.0 |
| 20(1) | 2(1)  | 4770.7 | 4568.4 | 0.0 |
| 20(1) | 3(1)  | 4224.7 | 4069.4 | 0.0 |
| 20(1) | 4(1)  | 4212.4 | 4057.1 | 0.0 |
| 20(1) | 5(1)  | 4199.4 | 4053.3 | 0.0 |
| 20(1) | 6(1)  | 2827.0 | 2769.6 | 0.0 |
| 20(1) | 7(1)  | 2679.0 | 2614.0 | 0.0 |
| 20(1) | 8(1)  | 2634.6 | 2574.7 | 0.0 |
| 20(1) | 9(1)  | 2550.8 | 2493.9 | 0.0 |
| 20(1) | 10(1) | 2494.1 | 2438.9 | 0.0 |
| 20(1) | 11(1) | 2377.9 | 2326.2 | 0.0 |
| 20(1) | 12(1) | 2372.6 | 2308.1 | 0.0 |
| 20(1) | 13(1) | 2355.6 | 2304.0 | 0.0 |
| 20(1) | 14(1) | 2283.2 | 2234.0 | 0.0 |
| 20(1) | 15(1) | 2249.7 | 2201.3 | 0.0 |
| 20(1) | 16(1) | 2205.9 | 2154.9 | 0.0 |
| 20(1) | 17(1) | 2184.6 | 2144.1 | 0.0 |
| 20(1) | 18(1) | 2149.8 | 2106.6 | 0.0 |
| 20(1) | 19(1) | 2101.9 | 2057.0 | 0.0 |
| 21(1) | 1(1)  | 4795.6 | 4598.2 | 0.0 |
| 21(1) | 2(1)  | 4741.4 | 4544.0 | 0.0 |
| 21(1) | 3(1)  | 4195.4 | 4054.9 | 0.0 |

|       |       |        |        |     |
|-------|-------|--------|--------|-----|
| 21(1) | 4(1)  | 4183.1 | 4040.9 | 0.2 |
| 21(1) | 5(1)  | 4170.1 | 4028.1 | 0.1 |
| 21(1) | 6(1)  | 2797.7 | 2745.7 | 0.0 |
| 21(1) | 7(1)  | 2649.8 | 2589.7 | 0.0 |
| 21(1) | 8(1)  | 2605.3 | 2548.8 | 0.0 |
| 21(1) | 9(1)  | 2521.6 | 2468.8 | 0.3 |
| 21(1) | 10(1) | 2464.9 | 2414.7 | 0.5 |
| 21(1) | 11(1) | 2348.7 | 2303.6 | 0.1 |
| 21(1) | 12(1) | 2343.3 | 2284.8 | 0.1 |
| 21(1) | 13(1) | 2326.3 | 2277.5 | 0.5 |
| 21(1) | 14(1) | 2253.9 | 2210.3 | 0.4 |
| 21(1) | 15(1) | 2220.4 | 2178.4 | 0.0 |
| 21(1) | 16(1) | 2176.6 | 2129.9 | 0.6 |
| 21(1) | 17(1) | 2155.3 | 2119.3 | 0.2 |
| 21(1) | 18(1) | 2120.5 | 2083.6 | 0.1 |
| 21(1) | 19(1) | 2072.6 | 2033.1 | 0.4 |
| 21(1) | 20(1) | 1996.8 | 1958.4 | 0.0 |
| 22(1) | 1(1)  | 4679.4 | 4485.9 | 0.0 |
| 22(1) | 2(1)  | 4625.2 | 4432.5 | 0.0 |
| 22(1) | 3(1)  | 4079.2 | 3938.0 | 0.0 |
| 22(1) | 4(1)  | 4066.9 | 3922.6 | 0.0 |
| 22(1) | 5(1)  | 4053.9 | 3916.4 | 0.0 |
| 22(1) | 6(1)  | 2681.5 | 2633.2 | 0.0 |
| 22(1) | 7(1)  | 2533.6 | 2477.8 | 0.0 |
| 22(1) | 8(1)  | 2489.1 | 2438.5 | 0.0 |
| 22(1) | 9(1)  | 2405.4 | 2357.2 | 0.0 |
| 22(1) | 10(1) | 2348.7 | 2303.3 | 0.0 |
| 22(1) | 11(1) | 2232.5 | 2191.4 | 0.0 |
| 22(1) | 12(1) | 2227.1 | 2171.5 | 0.0 |
| 22(1) | 13(1) | 2210.1 | 2168.0 | 0.0 |
| 22(1) | 14(1) | 2137.7 | 2098.5 | 0.0 |
| 22(1) | 15(1) | 2104.2 | 2065.6 | 0.0 |
| 22(1) | 16(1) | 2060.4 | 2016.7 | 0.0 |
| 22(1) | 17(1) | 2039.1 | 2008.2 | 0.0 |
| 22(1) | 18(1) | 2004.3 | 1972.1 | 0.0 |
| 22(1) | 19(1) | 1956.4 | 1920.8 | 0.0 |
| 22(1) | 20(1) | 1880.6 | 1843.0 | 0.7 |
| 22(1) | 21(1) | 1851.3 | 1821.8 | 0.0 |
| 23(1) | 1(1)  | 4655.7 | 4474.3 | 0.0 |
| 23(1) | 2(1)  | 4601.5 | 4420.8 | 0.0 |

|       |       |        |        |     |
|-------|-------|--------|--------|-----|
| 23(1) | 3(1)  | 4055.5 | 3932.4 | 0.0 |
| 23(1) | 4(1)  | 4043.2 | 3918.3 | 0.0 |
| 23(1) | 5(1)  | 4030.3 | 3893.9 | 0.0 |
| 23(1) | 6(1)  | 2657.8 | 2622.2 | 0.0 |
| 23(1) | 7(1)  | 2509.9 | 2466.4 | 0.0 |
| 23(1) | 8(1)  | 2465.4 | 2426.9 | 0.0 |
| 23(1) | 9(1)  | 2381.7 | 2348.0 | 0.0 |
| 23(1) | 10(1) | 2325.0 | 2291.3 | 0.0 |
| 23(1) | 11(1) | 2208.8 | 2179.8 | 0.0 |
| 23(1) | 12(1) | 2203.4 | 2160.6 | 0.0 |
| 23(1) | 13(1) | 2186.4 | 2156.1 | 0.0 |
| 23(1) | 14(1) | 2114.0 | 2087.8 | 0.0 |
| 23(1) | 15(1) | 2080.5 | 2055.3 | 0.0 |
| 23(1) | 16(1) | 2036.7 | 2004.9 | 0.0 |
| 23(1) | 17(1) | 2015.4 | 1997.6 | 0.0 |
| 23(1) | 18(1) | 1980.6 | 1960.0 | 0.0 |
| 23(1) | 19(1) | 1932.8 | 1909.9 | 0.0 |
| 23(1) | 20(1) | 1856.9 | 1836.2 | 0.4 |
| 23(1) | 21(1) | 1827.6 | 1810.9 | 0.0 |
| 23(1) | 22(1) | 1711.4 | 1700.3 | 0.4 |
| 24(1) | 1(1)  | 4588.6 | 4404.3 | 0.0 |
| 24(1) | 2(1)  | 4534.4 | 4350.4 | 0.0 |
| 24(1) | 3(1)  | 3988.4 | 3860.8 | 0.0 |
| 24(1) | 4(1)  | 3976.1 | 3846.9 | 0.0 |
| 24(1) | 5(1)  | 3963.2 | 3834.3 | 0.0 |
| 24(1) | 6(1)  | 2590.7 | 2549.3 | 0.0 |
| 24(1) | 7(1)  | 2442.8 | 2397.1 | 0.0 |
| 24(1) | 8(1)  | 2398.3 | 2357.6 | 0.0 |
| 24(1) | 9(1)  | 2314.6 | 2276.1 | 0.0 |
| 24(1) | 10(1) | 2257.9 | 2222.2 | 0.0 |
| 24(1) | 11(1) | 2141.7 | 2110.1 | 0.0 |
| 24(1) | 12(1) | 2136.3 | 2087.5 | 0.0 |
| 24(1) | 13(1) | 2119.3 | 2085.8 | 0.0 |
| 24(1) | 14(1) | 2046.9 | 2016.8 | 0.0 |
| 24(1) | 15(1) | 2013.5 | 1979.5 | 0.0 |
| 24(1) | 16(1) | 1969.6 | 1937.2 | 0.0 |
| 24(1) | 17(1) | 1948.3 | 1926.3 | 0.0 |
| 24(1) | 18(1) | 1913.5 | 1889.1 | 0.0 |
| 24(1) | 19(1) | 1865.7 | 1838.8 | 0.0 |
| 24(1) | 20(1) | 1789.8 | 1763.8 | 1.2 |

|       |       |        |        |     |
|-------|-------|--------|--------|-----|
| 24(1) | 21(1) | 1760.5 | 1740.6 | 0.0 |
| 24(1) | 22(1) | 1644.3 | 1628.3 | 0.6 |
| 24(1) | 23(1) | 1620.6 | 1618.8 | 0.3 |
| 25(1) | 1(1)  | 4578.9 | 4387.9 | 0.0 |
| 25(1) | 2(1)  | 4524.7 | 4331.7 | 0.5 |
| 25(1) | 3(1)  | 3978.7 | 3845.3 | 0.0 |
| 25(1) | 4(1)  | 3966.4 | 3831.2 | 0.0 |
| 25(1) | 5(1)  | 3953.4 | 3818.6 | 0.1 |
| 25(1) | 6(1)  | 2581.0 | 2531.2 | 0.1 |
| 25(1) | 7(1)  | 2433.1 | 2380.4 | 0.2 |
| 25(1) | 8(1)  | 2388.6 | 2341.1 | 0.0 |
| 25(1) | 9(1)  | 2304.9 | 2259.4 | 0.1 |
| 25(1) | 10(1) | 2248.2 | 2205.0 | 0.3 |
| 25(1) | 11(1) | 2132.0 | 2092.5 | 0.0 |
| 25(1) | 12(1) | 2126.6 | 2072.3 | 0.9 |
| 25(1) | 13(1) | 2109.6 | 2068.7 | 0.1 |
| 25(1) | 14(1) | 2037.2 | 1999.9 | 0.3 |
| 25(1) | 15(1) | 2003.7 | 1967.0 | 2.4 |
| 25(1) | 16(1) | 1959.9 | 1920.2 | 0.1 |
| 25(1) | 17(1) | 1938.6 | 1909.9 | 1.1 |
| 25(1) | 18(1) | 1903.8 | 1872.2 | 1.1 |
| 25(1) | 19(1) | 1855.9 | 1820.6 | 0.4 |
| 25(1) | 20(1) | 1780.1 | 1747.3 | 0.0 |
| 25(1) | 21(1) | 1750.8 | 1723.5 | 0.1 |
| 25(1) | 22(1) | 1634.6 | 1611.2 | 0.0 |
| 25(1) | 23(1) | 1610.9 | 1600.3 | 0.0 |
| 25(1) | 24(1) | 1543.8 | 1529.1 | 0.0 |
| 26(1) | 1(1)  | 4564.7 | 4370.7 | 0.0 |
| 26(1) | 2(1)  | 4510.5 | 4316.6 | 0.0 |
| 26(1) | 3(1)  | 3964.5 | 3827.9 | 0.1 |
| 26(1) | 4(1)  | 3952.2 | 3814.1 | 0.2 |
| 26(1) | 5(1)  | 3939.2 | 3802.2 | 0.0 |
| 26(1) | 6(1)  | 2566.8 | 2517.8 | 0.0 |
| 26(1) | 7(1)  | 2418.8 | 2362.5 | 0.8 |
| 26(1) | 8(1)  | 2374.4 | 2323.4 | 0.3 |
| 26(1) | 9(1)  | 2290.6 | 2241.8 | 0.2 |
| 26(1) | 10(1) | 2233.9 | 2187.4 | 0.0 |
| 26(1) | 11(1) | 2117.7 | 2073.7 | 0.1 |
| 26(1) | 12(1) | 2112.4 | 2056.5 | 0.0 |
| 26(1) | 13(1) | 2095.4 | 2050.7 | 0.4 |



|       |       |        |        |     |
|-------|-------|--------|--------|-----|
| 26(1) | 14(1) | 2023.0 | 1981.6 | 0.3 |
| 26(1) | 15(1) | 1989.5 | 1950.3 | 0.1 |
| 26(1) | 16(1) | 1945.7 | 1903.2 | 0.4 |
| 26(1) | 17(1) | 1924.4 | 1893.1 | 0.4 |
| 26(1) | 18(1) | 1889.6 | 1855.3 | 0.0 |
| 26(1) | 19(1) | 1841.7 | 1805.7 | 0.9 |
| 26(1) | 20(1) | 1765.9 | 1730.2 | 0.0 |
| 26(1) | 21(1) | 1736.6 | 1706.8 | 0.2 |
| 26(1) | 22(1) | 1620.4 | 1594.0 | 0.0 |
| 26(1) | 23(1) | 1596.7 | 1583.4 | 0.0 |
| 26(1) | 24(1) | 1529.6 | 1512.5 | 0.0 |
| 26(1) | 25(1) | 1519.9 | 1495.8 | 0.8 |
| 27(1) | 1(1)  | 4504.1 | 4321.6 | 0.0 |
| 27(1) | 2(1)  | 4449.9 | 4267.5 | 0.0 |
| 27(1) | 3(1)  | 3903.9 | 3778.7 | 0.0 |
| 27(1) | 4(1)  | 3891.6 | 3764.5 | 0.0 |
| 27(1) | 5(1)  | 3878.7 | 3751.0 | 0.0 |
| 27(1) | 6(1)  | 2506.2 | 2468.1 | 0.0 |
| 27(1) | 7(1)  | 2358.3 | 2313.6 | 0.0 |
| 27(1) | 8(1)  | 2313.8 | 2274.2 | 0.0 |
| 27(1) | 9(1)  | 2230.1 | 2193.0 | 0.0 |
| 27(1) | 10(1) | 2173.4 | 2139.0 | 0.0 |
| 27(1) | 11(1) | 2057.2 | 2024.9 | 0.0 |
| 27(1) | 12(1) | 2051.8 | 2007.6 | 0.0 |
| 27(1) | 13(1) | 2034.8 | 2002.8 | 0.0 |
| 27(1) | 14(1) | 1962.4 | 1934.0 | 0.0 |
| 27(1) | 15(1) | 1928.9 | 1900.5 | 0.0 |
| 27(1) | 16(1) | 1885.1 | 1854.5 | 0.0 |
| 27(1) | 17(1) | 1863.8 | 1843.6 | 0.0 |
| 27(1) | 18(1) | 1829.0 | 1804.6 | 0.0 |
| 27(1) | 19(1) | 1781.2 | 1756.5 | 0.0 |
| 27(1) | 20(1) | 1705.3 | 1682.8 | 0.1 |
| 27(1) | 21(1) | 1676.0 | 1656.4 | 0.0 |
| 27(1) | 22(1) | 1559.8 | 1546.1 | 0.6 |
| 27(1) | 23(1) | 1536.1 | 1537.1 | 3.6 |
| 27(1) | 24(1) | 1469.0 | 1465.1 | 3.4 |
| 27(1) | 25(1) | 1459.3 | 1446.9 | 0.0 |
| 27(1) | 26(1) | 1445.1 | 1429.6 | 0.0 |
| 28(1) | 1(1)  | 4451.7 | 4260.8 | 0.0 |
| 28(1) | 2(1)  | 4397.5 | 4206.6 | 0.0 |

|       |       |        |        |     |
|-------|-------|--------|--------|-----|
| 28(1) | 3(1)  | 3851.5 | 3717.8 | 0.0 |
| 28(1) | 4(1)  | 3839.1 | 3703.6 | 0.0 |
| 28(1) | 5(1)  | 3826.2 | 3691.5 | 0.0 |
| 28(1) | 6(1)  | 2453.7 | 2407.5 | 0.0 |
| 28(1) | 7(1)  | 2305.8 | 2252.9 | 0.0 |
| 28(1) | 8(1)  | 2261.4 | 2213.0 | 0.0 |
| 28(1) | 9(1)  | 2177.6 | 2133.4 | 0.0 |
| 28(1) | 10(1) | 2120.9 | 2077.3 | 0.0 |
| 28(1) | 11(1) | 2004.7 | 1964.6 | 0.0 |
| 28(1) | 12(1) | 1999.3 | 1945.5 | 0.0 |
| 28(1) | 13(1) | 1982.4 | 1941.2 | 0.0 |
| 28(1) | 14(1) | 1909.9 | 1872.6 | 0.0 |
| 28(1) | 15(1) | 1876.5 | 1842.9 | 0.0 |
| 28(1) | 16(1) | 1832.6 | 1794.3 | 0.0 |
| 28(1) | 17(1) | 1811.4 | 1780.7 | 0.0 |
| 28(1) | 18(1) | 1776.5 | 1745.8 | 0.0 |
| 28(1) | 19(1) | 1728.7 | 1694.4 | 0.0 |
| 28(1) | 20(1) | 1652.8 | 1620.5 | 3.9 |
| 28(1) | 21(1) | 1623.5 | 1595.9 | 0.0 |
| 28(1) | 22(1) | 1507.3 | 1484.5 | 0.6 |
| 28(1) | 23(1) | 1483.7 | 1475.1 | 6.1 |
| 28(1) | 24(1) | 1416.6 | 1404.7 | 3.5 |
| 28(1) | 25(1) | 1406.8 | 1385.7 | 0.0 |
| 28(1) | 26(1) | 1392.6 | 1368.7 | 0.0 |
| 28(1) | 27(1) | 1332.1 | 1321.1 | 5.5 |
| 29(1) | 1(1)  | 4433.0 | 4245.8 | 0.0 |
| 29(1) | 2(1)  | 4378.8 | 4191.1 | 0.1 |
| 29(1) | 3(1)  | 3832.8 | 3703.1 | 0.0 |
| 29(1) | 4(1)  | 3820.5 | 3689.0 | 0.0 |
| 29(1) | 5(1)  | 3807.6 | 3676.4 | 0.0 |
| 29(1) | 6(1)  | 2435.1 | 2390.5 | 0.0 |
| 29(1) | 7(1)  | 2287.2 | 2238.0 | 0.0 |
| 29(1) | 8(1)  | 2242.7 | 2198.4 | 0.0 |
| 29(1) | 9(1)  | 2159.0 | 2116.5 | 0.0 |
| 29(1) | 10(1) | 2102.3 | 2062.8 | 0.1 |
| 29(1) | 11(1) | 1986.1 | 1949.1 | 0.0 |
| 29(1) | 12(1) | 1980.7 | 1930.2 | 0.0 |
| 29(1) | 13(1) | 1963.8 | 1926.0 | 0.0 |
| 29(1) | 14(1) | 1891.3 | 1857.8 | 0.0 |
| 29(1) | 15(1) | 1857.9 | 1823.9 | 0.0 |

|       |       |        |        |       |
|-------|-------|--------|--------|-------|
| 29(1) | 16(1) | 1814.0 | 1777.9 | 0.5   |
| 29(1) | 17(1) | 1792.7 | 1767.7 | 0.4   |
| 29(1) | 18(1) | 1757.9 | 1730.2 | 0.3   |
| 29(1) | 19(1) | 1710.1 | 1680.1 | 0.1   |
| 29(1) | 20(1) | 1634.2 | 1605.2 | 0.0   |
| 29(1) | 21(1) | 1604.9 | 1581.2 | 0.2   |
| 29(1) | 22(1) | 1488.7 | 1469.2 | 0.0   |
| 29(1) | 23(1) | 1465.0 | 1458.0 | 0.0   |
| 29(1) | 24(1) | 1397.9 | 1387.6 | 0.0   |
| 29(1) | 25(1) | 1388.2 | 1372.2 | 22.5  |
| 29(1) | 26(1) | 1374.0 | 1354.8 | 11.0  |
| 29(1) | 27(1) | 1313.4 | 1305.8 | 0.0   |
| 29(1) | 28(1) | 1261.0 | 1243.4 | 0.0   |
| 30(1) | 1(1)  | 4400.8 | 4214.5 | 0.0   |
| 30(1) | 2(1)  | 4346.6 | 4159.8 | 0.4   |
| 30(1) | 3(1)  | 3800.6 | 3672.2 | 0.0   |
| 30(1) | 4(1)  | 3788.2 | 3658.0 | 0.0   |
| 30(1) | 5(1)  | 3775.3 | 3645.7 | 0.0   |
| 30(1) | 6(1)  | 2402.8 | 2359.0 | 0.0   |
| 30(1) | 7(1)  | 2254.9 | 2206.5 | 0.0   |
| 30(1) | 8(1)  | 2210.5 | 2167.2 | 0.0   |
| 30(1) | 9(1)  | 2126.7 | 2085.6 | 0.1   |
| 30(1) | 10(1) | 2070.0 | 2031.7 | 0.0   |
| 30(1) | 11(1) | 1953.8 | 1919.8 | 0.3   |
| 30(1) | 12(1) | 1948.4 | 1901.1 | 0.2   |
| 30(1) | 13(1) | 1931.5 | 1895.3 | 0.1   |
| 30(1) | 14(1) | 1859.0 | 1826.8 | 0.7   |
| 30(1) | 15(1) | 1825.6 | 1796.6 | 73.2  |
| 30(1) | 16(1) | 1781.7 | 1746.9 | 0.7   |
| 30(1) | 17(1) | 1760.5 | 1736.4 | 0.5   |
| 30(1) | 18(1) | 1725.6 | 1699.8 | 0.4   |
| 30(1) | 19(1) | 1677.8 | 1649.3 | 5.9   |
| 30(1) | 20(1) | 1601.9 | 1574.2 | 0.0   |
| 30(1) | 21(1) | 1572.6 | 1550.3 | 0.8   |
| 30(1) | 22(1) | 1456.5 | 1438.2 | 0.0   |
| 30(1) | 23(1) | 1432.8 | 1427.3 | 0.0   |
| 30(1) | 24(1) | 1365.7 | 1356.4 | 0.0   |
| 30(1) | 25(1) | 1356.0 | 1337.4 | 224.3 |
| 30(1) | 26(1) | 1341.7 | 1322.8 | 1.1   |
| 30(1) | 27(1) | 1281.2 | 1273.9 | 0.0   |

|       |       |        |        |     |
|-------|-------|--------|--------|-----|
| 30(1) | 28(1) | 1228.7 | 1212.5 | 0.0 |
| 30(1) | 29(1) | 1210.1 | 1197.6 | 0.8 |
| 31(1) | 1(1)  | 4376.8 | 4176.4 | 0.0 |
| 31(1) | 2(1)  | 4322.6 | 4126.8 | 0.7 |
| 31(1) | 3(1)  | 3776.6 | 3634.2 | 0.0 |
| 31(1) | 4(1)  | 3764.3 | 3620.2 | 0.0 |
| 31(1) | 5(1)  | 3751.3 | 3607.4 | 0.0 |
| 31(1) | 6(1)  | 2378.9 | 2323.7 | 0.0 |
| 31(1) | 7(1)  | 2230.9 | 2169.0 | 0.0 |
| 31(1) | 8(1)  | 2186.5 | 2130.7 | 0.0 |
| 31(1) | 9(1)  | 2102.7 | 2049.0 | 0.0 |
| 31(1) | 10(1) | 2046.0 | 1994.6 | 0.0 |
| 31(1) | 11(1) | 1929.8 | 1881.8 | 0.0 |
| 31(1) | 12(1) | 1924.5 | 1855.0 | 0.3 |
| 31(1) | 13(1) | 1907.5 | 1858.2 | 0.0 |
| 31(1) | 14(1) | 1835.1 | 1791.7 | 0.0 |
| 31(1) | 15(1) | 1801.6 | 1765.4 | 0.0 |
| 31(1) | 16(1) | 1757.8 | 1709.5 | 0.0 |
| 31(1) | 17(1) | 1736.5 | 1708.2 | 0.0 |
| 31(1) | 18(1) | 1701.7 | 1659.9 | 0.0 |
| 31(1) | 19(1) | 1653.8 | 1611.0 | 0.0 |
| 31(1) | 20(1) | 1578.0 | 1536.5 | 0.3 |
| 31(1) | 21(1) | 1548.7 | 1513.2 | 0.0 |
| 31(1) | 22(1) | 1432.5 | 1400.8 | 2.5 |
| 31(1) | 23(1) | 1408.8 | 1393.0 | 3.1 |
| 31(1) | 24(1) | 1341.7 | 1336.7 | 1.7 |
| 31(1) | 25(1) | 1332.0 | 1301.7 | 0.0 |
| 31(1) | 26(1) | 1317.8 | 1285.2 | 0.0 |
| 31(1) | 27(1) | 1257.2 | 1235.4 | 1.9 |
| 31(1) | 28(1) | 1204.7 | 1168.9 | 3.7 |
| 31(1) | 29(1) | 1186.1 | 1159.7 | 0.0 |
| 31(1) | 30(1) | 1153.8 | 1128.2 | 0.0 |
| 32(1) | 1(1)  | 4338.5 | 4153.3 | 0.0 |
| 32(1) | 2(1)  | 4284.3 | 4099.0 | 0.1 |
| 32(1) | 3(1)  | 3738.3 | 3610.8 | 0.0 |
| 32(1) | 4(1)  | 3725.9 | 3596.8 | 0.0 |
| 32(1) | 5(1)  | 3713.0 | 3584.5 | 0.1 |
| 32(1) | 6(1)  | 2340.6 | 2300.2 | 0.0 |
| 32(1) | 7(1)  | 2192.6 | 2145.0 | 0.3 |
| 32(1) | 8(1)  | 2148.2 | 2107.8 | 0.2 |

|       |       |        |        |      |
|-------|-------|--------|--------|------|
| 32(1) | 9(1)  | 2064.4 | 2024.7 | 0.1  |
| 32(1) | 10(1) | 2007.7 | 1969.1 | 0.0  |
| 32(1) | 11(1) | 1891.5 | 1857.2 | 0.1  |
| 32(1) | 12(1) | 1886.1 | 1839.5 | 0.0  |
| 32(1) | 13(1) | 1869.2 | 1834.1 | 0.1  |
| 32(1) | 14(1) | 1796.7 | 1764.9 | 0.3  |
| 32(1) | 15(1) | 1763.3 | 1732.9 | 0.2  |
| 32(1) | 16(1) | 1719.4 | 1685.6 | 0.4  |
| 32(1) | 17(1) | 1698.2 | 1675.0 | 1.1  |
| 32(1) | 18(1) | 1663.3 | 1639.5 | 1.0  |
| 32(1) | 19(1) | 1615.5 | 1586.5 | 23.5 |
| 32(1) | 20(1) | 1539.6 | 1512.9 | 0.0  |
| 32(1) | 21(1) | 1510.4 | 1489.6 | 3.3  |
| 32(1) | 22(1) | 1394.2 | 1376.9 | 0.0  |
| 32(1) | 23(1) | 1370.5 | 1365.8 | 0.0  |
| 32(1) | 24(1) | 1303.4 | 1295.1 | 0.0  |
| 32(1) | 25(1) | 1293.7 | 1278.4 | 2.4  |
| 32(1) | 26(1) | 1279.4 | 1262.2 | 9.4  |
| 32(1) | 27(1) | 1218.9 | 1212.3 | 0.0  |
| 32(1) | 28(1) | 1166.4 | 1151.2 | 0.0  |
| 32(1) | 29(1) | 1147.8 | 1136.3 | 0.1  |
| 32(1) | 30(1) | 1115.5 | 1105.3 | 0.2  |
| 32(1) | 31(1) | 1091.5 | 1067.6 | 0.0  |
| 33(1) | 1(1)  | 4282.1 | 4094.8 | 0.0  |
| 33(1) | 2(1)  | 4227.9 | 4040.7 | 0.0  |
| 33(1) | 3(1)  | 3681.9 | 3551.8 | 0.0  |
| 33(1) | 4(1)  | 3669.6 | 3537.8 | 0.0  |
| 33(1) | 5(1)  | 3656.7 | 3525.7 | 0.0  |
| 33(1) | 6(1)  | 2284.2 | 2241.7 | 0.0  |
| 33(1) | 7(1)  | 2136.3 | 2086.8 | 0.0  |
| 33(1) | 8(1)  | 2091.8 | 2047.3 | 0.0  |
| 33(1) | 9(1)  | 2008.1 | 1966.2 | 0.0  |
| 33(1) | 10(1) | 1951.4 | 1912.0 | 0.0  |
| 33(1) | 11(1) | 1835.2 | 1798.3 | 0.0  |
| 33(1) | 12(1) | 1829.8 | 1780.7 | 0.0  |
| 33(1) | 13(1) | 1812.9 | 1775.8 | 0.0  |
| 33(1) | 14(1) | 1740.4 | 1707.0 | 0.0  |
| 33(1) | 15(1) | 1707.0 | 1671.9 | 0.0  |
| 33(1) | 16(1) | 1663.1 | 1627.1 | 0.0  |
| 33(1) | 17(1) | 1641.8 | 1616.7 | 0.0  |

|       |       |        |        |      |
|-------|-------|--------|--------|------|
| 33(1) | 18(1) | 1607.0 | 1578.2 | 0.0  |
| 33(1) | 19(1) | 1559.2 | 1529.1 | 0.0  |
| 33(1) | 20(1) | 1483.3 | 1457.0 | 0.5  |
| 33(1) | 21(1) | 1454.0 | 1430.9 | 0.0  |
| 33(1) | 22(1) | 1337.8 | 1320.6 | 4.1  |
| 33(1) | 23(1) | 1314.1 | 1307.4 | 0.3  |
| 33(1) | 24(1) | 1247.0 | 1238.6 | 7.7  |
| 33(1) | 25(1) | 1237.3 | 1219.8 | 0.0  |
| 33(1) | 26(1) | 1223.1 | 1202.6 | 0.0  |
| 33(1) | 27(1) | 1162.5 | 1156.7 | 12.9 |
| 33(1) | 28(1) | 1110.1 | 1092.1 | 1.9  |
| 33(1) | 29(1) | 1091.5 | 1077.8 | 0.0  |
| 33(1) | 30(1) | 1059.2 | 1046.7 | 0.0  |
| 33(1) | 31(1) | 1035.2 | 1009.2 | 0.2  |
| 33(1) | 32(1) | 996.9  | 985.4  | 0.0  |
| 34(1) | 1(1)  | 4227.9 | 4045.1 | 0.0  |
| 34(1) | 2(1)  | 4173.7 | 3991.5 | 0.2  |
| 34(1) | 3(1)  | 3627.7 | 3502.7 | 0.0  |
| 34(1) | 4(1)  | 3615.4 | 3488.6 | 0.0  |
| 34(1) | 5(1)  | 3602.5 | 3476.1 | 0.0  |
| 34(1) | 6(1)  | 2230.0 | 2191.9 | 0.0  |
| 34(1) | 7(1)  | 2082.1 | 2037.2 | 0.0  |
| 34(1) | 8(1)  | 2037.6 | 1999.2 | 0.0  |
| 34(1) | 9(1)  | 1953.9 | 1916.6 | 0.0  |
| 34(1) | 10(1) | 1897.2 | 1862.3 | 0.2  |
| 34(1) | 11(1) | 1781.0 | 1750.6 | 1.2  |
| 34(1) | 12(1) | 1775.6 | 1729.7 | 6.4  |
| 34(1) | 13(1) | 1758.7 | 1725.7 | 0.1  |
| 34(1) | 14(1) | 1686.2 | 1657.3 | 0.0  |
| 34(1) | 15(1) | 1652.8 | 1624.1 | 1.1  |
| 34(1) | 16(1) | 1608.9 | 1576.8 | 3.6  |
| 34(1) | 17(1) | 1587.6 | 1567.9 | 0.6  |
| 34(1) | 18(1) | 1552.8 | 1530.0 | 0.0  |
| 34(1) | 19(1) | 1505.0 | 1479.8 | 0.4  |
| 34(1) | 20(1) | 1429.1 | 1404.6 | 0.0  |
| 34(1) | 21(1) | 1399.8 | 1381.1 | 0.5  |
| 34(1) | 22(1) | 1283.6 | 1268.6 | 0.0  |
| 34(1) | 23(1) | 1259.9 | 1257.8 | 0.0  |
| 34(1) | 24(1) | 1192.8 | 1186.9 | 0.0  |
| 34(1) | 25(1) | 1183.1 | 1169.7 | 3.8  |

|       |       |        |        |      |
|-------|-------|--------|--------|------|
| 34(1) | 26(1) | 1168.9 | 1152.2 | 3.3  |
| 34(1) | 27(1) | 1108.3 | 1104.1 | 0.0  |
| 34(1) | 28(1) | 1055.9 | 1043.0 | 0.0  |
| 34(1) | 29(1) | 1037.3 | 1027.6 | 0.1  |
| 34(1) | 30(1) | 1005.0 | 997.0  | 0.0  |
| 34(1) | 31(1) | 981.0  | 957.8  | 0.0  |
| 34(1) | 32(1) | 942.7  | 935.9  | 0.0  |
| 34(1) | 33(1) | 886.4  | 876.3  | 0.0  |
| 35(1) | 1(1)  | 4198.4 | 3981.1 | 1.4  |
| 35(1) | 2(1)  | 4144.2 | 3933.3 | 0.0  |
| 35(1) | 3(1)  | 3598.1 | 3445.7 | 0.0  |
| 35(1) | 4(1)  | 3585.8 | 3431.7 | 0.0  |
| 35(1) | 5(1)  | 3572.9 | 3422.1 | 0.0  |
| 35(1) | 6(1)  | 2200.4 | 2135.5 | 0.0  |
| 35(1) | 7(1)  | 2052.5 | 1980.5 | 0.0  |
| 35(1) | 8(1)  | 2008.1 | 1940.4 | 0.0  |
| 35(1) | 9(1)  | 1924.3 | 1859.5 | 0.0  |
| 35(1) | 10(1) | 1867.6 | 1802.6 | 0.0  |
| 35(1) | 11(1) | 1751.4 | 1691.8 | 0.0  |
| 35(1) | 12(1) | 1746.0 | 1673.8 | 0.0  |
| 35(1) | 13(1) | 1729.1 | 1669.4 | 0.0  |
| 35(1) | 14(1) | 1656.6 | 1599.2 | 0.0  |
| 35(1) | 15(1) | 1623.2 | 1568.4 | 0.0  |
| 35(1) | 16(1) | 1579.3 | 1521.7 | 0.1  |
| 35(1) | 17(1) | 1558.0 | 1509.8 | 0.0  |
| 35(1) | 18(1) | 1523.2 | 1473.5 | 0.0  |
| 35(1) | 19(1) | 1475.4 | 1423.7 | 0.0  |
| 35(1) | 20(1) | 1399.5 | 1347.9 | 0.0  |
| 35(1) | 21(1) | 1370.2 | 1324.2 | 0.0  |
| 35(1) | 22(1) | 1254.0 | 1214.3 | 0.7  |
| 35(1) | 23(1) | 1230.3 | 1206.5 | 22.8 |
| 35(1) | 24(1) | 1163.3 | 1130.3 | 1.4  |
| 35(1) | 25(1) | 1153.5 | 1112.8 | 0.0  |
| 35(1) | 26(1) | 1139.3 | 1090.2 | 0.0  |
| 35(1) | 27(1) | 1078.7 | 1047.3 | 1.6  |
| 35(1) | 28(1) | 1026.3 | 983.0  | 2.8  |
| 35(1) | 29(1) | 1007.7 | 969.9  | 0.0  |
| 35(1) | 30(1) | 975.4  | 939.9  | 0.0  |
| 35(1) | 31(1) | 951.4  | 902.0  | 0.1  |
| 35(1) | 32(1) | 913.1  | 878.9  | 0.0  |

|       |       |        |        |      |
|-------|-------|--------|--------|------|
| 35(1) | 33(1) | 856.8  | 820.3  | 0.1  |
| 35(1) | 34(1) | 802.6  | 770.1  | 0.2  |
| 36(1) | 1(1)  | 4176.3 | 3993.3 | 0.0  |
| 36(1) | 2(1)  | 4122.1 | 3939.4 | 0.1  |
| 36(1) | 3(1)  | 3576.1 | 3450.6 | 0.0  |
| 36(1) | 4(1)  | 3563.8 | 3436.6 | 0.0  |
| 36(1) | 5(1)  | 3550.9 | 3424.2 | 0.0  |
| 36(1) | 6(1)  | 2178.4 | 2140.4 | 0.0  |
| 36(1) | 7(1)  | 2030.5 | 1985.7 | 0.3  |
| 36(1) | 8(1)  | 1986.0 | 1946.4 | 0.1  |
| 36(1) | 9(1)  | 1902.3 | 1864.8 | 0.1  |
| 36(1) | 10(1) | 1845.6 | 1810.2 | 0.3  |
| 36(1) | 11(1) | 1729.4 | 1698.5 | 2.1  |
| 36(1) | 12(1) | 1724.0 | 1678.1 | 1.0  |
| 36(1) | 13(1) | 1707.1 | 1673.2 | 0.7  |
| 36(1) | 14(1) | 1634.6 | 1605.2 | 0.2  |
| 36(1) | 15(1) | 1601.2 | 1572.7 | 1.3  |
| 36(1) | 16(1) | 1557.3 | 1525.7 | 1.0  |
| 36(1) | 17(1) | 1536.0 | 1515.5 | 0.1  |
| 36(1) | 18(1) | 1501.2 | 1478.2 | 0.1  |
| 36(1) | 19(1) | 1453.4 | 1427.7 | 0.5  |
| 36(1) | 20(1) | 1377.5 | 1352.7 | 0.0  |
| 36(1) | 21(1) | 1348.2 | 1328.4 | 7.8  |
| 36(1) | 22(1) | 1232.0 | 1216.6 | 0.0  |
| 36(1) | 23(1) | 1208.3 | 1205.6 | 0.0  |
| 36(1) | 24(1) | 1141.2 | 1134.9 | 0.0  |
| 36(1) | 25(1) | 1131.5 | 1117.6 | 1.2  |
| 36(1) | 26(1) | 1117.3 | 1101.0 | 0.2  |
| 36(1) | 27(1) | 1056.7 | 1052.2 | 0.0  |
| 36(1) | 28(1) | 1004.3 | 991.2  | 0.0  |
| 36(1) | 29(1) | 985.7  | 976.7  | 10.1 |
| 36(1) | 30(1) | 953.4  | 944.8  | 0.0  |
| 36(1) | 31(1) | 929.4  | 906.1  | 0.0  |
| 36(1) | 32(1) | 891.1  | 883.8  | 0.0  |
| 36(1) | 33(1) | 834.8  | 825.1  | 0.0  |
| 36(1) | 34(1) | 780.6  | 775.8  | 0.0  |
| 36(1) | 35(1) | 751.0  | 718.3  | 0.0  |
| 37(1) | 1(1)  | 4144.7 | 3960.7 | 0.0  |
| 37(1) | 2(1)  | 4090.5 | 3907.8 | 0.8  |
| 37(1) | 3(1)  | 3544.5 | 3418.5 | 0.0  |



|       |       |        |        |     |
|-------|-------|--------|--------|-----|
| 37(1) | 4(1)  | 3532.2 | 3404.5 | 0.0 |
| 37(1) | 5(1)  | 3519.3 | 3391.9 | 0.0 |
| 37(1) | 6(1)  | 2146.8 | 2107.6 | 0.0 |
| 37(1) | 7(1)  | 1998.9 | 1953.0 | 0.0 |
| 37(1) | 8(1)  | 1954.4 | 1913.5 | 0.0 |
| 37(1) | 9(1)  | 1870.7 | 1833.3 | 0.2 |
| 37(1) | 10(1) | 1814.0 | 1778.2 | 0.0 |
| 37(1) | 11(1) | 1697.8 | 1667.1 | 8.0 |
| 37(1) | 12(1) | 1692.4 | 1646.2 | 0.1 |
| 37(1) | 13(1) | 1675.5 | 1641.9 | 4.6 |
| 37(1) | 14(1) | 1603.0 | 1572.9 | 1.2 |
| 37(1) | 15(1) | 1569.6 | 1540.3 | 0.1 |
| 37(1) | 16(1) | 1525.7 | 1493.1 | 1.3 |
| 37(1) | 17(1) | 1504.4 | 1482.6 | 0.6 |
| 37(1) | 18(1) | 1469.6 | 1445.3 | 2.7 |
| 37(1) | 19(1) | 1421.8 | 1395.4 | 0.1 |
| 37(1) | 20(1) | 1345.9 | 1320.5 | 0.0 |
| 37(1) | 21(1) | 1316.6 | 1296.2 | 0.9 |
| 37(1) | 22(1) | 1200.4 | 1184.4 | 0.0 |
| 37(1) | 23(1) | 1176.7 | 1173.5 | 0.0 |
| 37(1) | 24(1) | 1109.6 | 1102.6 | 0.0 |
| 37(1) | 25(1) | 1099.9 | 1086.3 | 0.2 |
| 37(1) | 26(1) | 1085.7 | 1068.9 | 0.1 |
| 37(1) | 27(1) | 1025.1 | 1020.0 | 0.0 |
| 37(1) | 28(1) | 972.7  | 958.7  | 0.0 |
| 37(1) | 29(1) | 954.1  | 943.7  | 0.0 |
| 37(1) | 30(1) | 921.8  | 913.0  | 0.0 |
| 37(1) | 31(1) | 897.8  | 873.6  | 0.0 |
| 37(1) | 32(1) | 859.5  | 851.3  | 0.0 |
| 37(1) | 33(1) | 803.2  | 793.0  | 0.0 |
| 37(1) | 34(1) | 749.0  | 743.1  | 0.1 |
| 37(1) | 35(1) | 719.4  | 686.4  | 0.0 |
| 37(1) | 36(1) | 697.4  | 691.0  | 0.0 |
| 38(1) | 1(1)  | 4105.7 | 3923.6 | 0.0 |
| 38(1) | 2(1)  | 4051.5 | 3870.2 | 0.0 |
| 38(1) | 3(1)  | 3505.5 | 3381.5 | 0.0 |
| 38(1) | 4(1)  | 3493.2 | 3367.4 | 0.0 |
| 38(1) | 5(1)  | 3480.3 | 3355.1 | 0.0 |
| 38(1) | 6(1)  | 2107.8 | 2071.0 | 0.0 |
| 38(1) | 7(1)  | 1959.9 | 1916.7 | 0.0 |

|       |       |        |        |     |
|-------|-------|--------|--------|-----|
| 38(1) | 8(1)  | 1915.4 | 1877.3 | 0.0 |
| 38(1) | 9(1)  | 1831.7 | 1795.9 | 0.0 |
| 38(1) | 10(1) | 1775.0 | 1741.1 | 0.0 |
| 38(1) | 11(1) | 1658.8 | 1628.7 | 0.0 |
| 38(1) | 12(1) | 1653.4 | 1609.8 | 0.0 |
| 38(1) | 13(1) | 1636.4 | 1605.5 | 0.0 |
| 38(1) | 14(1) | 1564.0 | 1535.5 | 0.0 |
| 38(1) | 15(1) | 1530.5 | 1503.5 | 0.0 |
| 38(1) | 16(1) | 1486.7 | 1457.0 | 0.1 |
| 38(1) | 17(1) | 1465.4 | 1445.9 | 0.0 |
| 38(1) | 18(1) | 1430.6 | 1408.7 | 0.0 |
| 38(1) | 19(1) | 1382.8 | 1359.4 | 0.0 |
| 38(1) | 20(1) | 1306.9 | 1284.3 | 2.0 |
| 38(1) | 21(1) | 1277.6 | 1259.6 | 0.0 |
| 38(1) | 22(1) | 1161.4 | 1146.9 | 1.0 |
| 38(1) | 23(1) | 1137.7 | 1136.8 | 0.0 |
| 38(1) | 24(1) | 1070.6 | 1066.1 | 0.9 |
| 38(1) | 25(1) | 1060.9 | 1049.1 | 0.0 |
| 38(1) | 26(1) | 1046.7 | 1032.2 | 0.0 |
| 38(1) | 27(1) | 986.1  | 983.8  | 4.2 |
| 38(1) | 28(1) | 933.7  | 922.5  | 0.4 |
| 38(1) | 29(1) | 915.0  | 906.9  | 0.0 |
| 38(1) | 30(1) | 882.8  | 876.2  | 0.1 |
| 38(1) | 31(1) | 858.8  | 838.2  | 0.9 |
| 38(1) | 32(1) | 820.5  | 814.5  | 0.1 |
| 38(1) | 33(1) | 764.1  | 759.8  | 0.2 |
| 38(1) | 34(1) | 709.9  | 707.7  | 0.0 |
| 38(1) | 35(1) | 680.3  | 650.2  | 0.3 |
| 38(1) | 36(1) | 658.3  | 655.1  | 0.0 |
| 38(1) | 37(1) | 626.7  | 622.0  | 0.0 |
| 39(1) | 1(1)  | 4041.1 | 3856.6 | 0.0 |
| 39(1) | 2(1)  | 3986.9 | 3802.7 | 0.0 |
| 39(1) | 3(1)  | 3440.9 | 3314.2 | 0.0 |
| 39(1) | 4(1)  | 3428.6 | 3300.1 | 0.0 |
| 39(1) | 5(1)  | 3415.6 | 3287.6 | 0.0 |
| 39(1) | 6(1)  | 2043.2 | 2003.7 | 0.0 |
| 39(1) | 7(1)  | 1895.2 | 1849.5 | 0.0 |
| 39(1) | 8(1)  | 1850.8 | 1810.0 | 0.0 |
| 39(1) | 9(1)  | 1767.0 | 1728.6 | 0.0 |
| 39(1) | 10(1) | 1710.3 | 1673.9 | 0.1 |

|       |       |        |        |     |
|-------|-------|--------|--------|-----|
| 39(1) | 11(1) | 1594.1 | 1561.1 | 0.0 |
| 39(1) | 12(1) | 1588.7 | 1542.4 | 0.0 |
| 39(1) | 13(1) | 1571.8 | 1537.6 | 0.1 |
| 39(1) | 14(1) | 1499.3 | 1468.8 | 0.0 |
| 39(1) | 15(1) | 1465.9 | 1436.1 | 0.0 |
| 39(1) | 16(1) | 1422.0 | 1389.0 | 0.0 |
| 39(1) | 17(1) | 1400.8 | 1378.3 | 0.1 |
| 39(1) | 18(1) | 1365.9 | 1341.5 | 0.0 |
| 39(1) | 19(1) | 1318.1 | 1291.5 | 0.0 |
| 39(1) | 20(1) | 1242.3 | 1216.1 | 0.1 |
| 39(1) | 21(1) | 1213.0 | 1192.6 | 0.0 |
| 39(1) | 22(1) | 1096.8 | 1080.0 | 0.0 |
| 39(1) | 23(1) | 1073.1 | 1069.4 | 0.2 |
| 39(1) | 24(1) | 1006.0 | 998.7  | 0.0 |
| 39(1) | 25(1) | 996.3  | 981.7  | 0.0 |
| 39(1) | 26(1) | 982.1  | 965.2  | 0.0 |
| 39(1) | 27(1) | 921.5  | 915.7  | 0.1 |
| 39(1) | 28(1) | 869.0  | 854.3  | 0.0 |
| 39(1) | 29(1) | 850.4  | 839.7  | 0.6 |
| 39(1) | 30(1) | 818.1  | 809.2  | 0.0 |
| 39(1) | 31(1) | 794.2  | 771.1  | 0.0 |
| 39(1) | 32(1) | 755.8  | 748.9  | 0.0 |
| 39(1) | 33(1) | 699.5  | 688.4  | 0.0 |
| 39(1) | 34(1) | 645.3  | 638.8  | 0.2 |
| 39(1) | 35(1) | 615.7  | 581.7  | 0.2 |
| 39(1) | 36(1) | 593.7  | 586.9  | 0.0 |
| 39(1) | 37(1) | 562.1  | 554.5  | 0.0 |
| 39(1) | 38(1) | 523.1  | 517.4  | 0.5 |
| 40(1) | 1(1)  | 4032.4 | 3848.2 | 0.0 |
| 40(1) | 2(1)  | 3978.3 | 3794.7 | 1.2 |
| 40(1) | 3(1)  | 3432.2 | 3305.9 | 0.0 |
| 40(1) | 4(1)  | 3419.9 | 3291.8 | 0.0 |
| 40(1) | 5(1)  | 3407.0 | 3279.2 | 0.0 |
| 40(1) | 6(1)  | 2034.5 | 1994.7 | 0.2 |
| 40(1) | 7(1)  | 1886.6 | 1841.3 | 0.0 |
| 40(1) | 8(1)  | 1842.2 | 1801.8 | 0.4 |
| 40(1) | 9(1)  | 1758.4 | 1720.2 | 0.4 |
| 40(1) | 10(1) | 1701.7 | 1665.9 | 3.6 |
| 40(1) | 11(1) | 1585.5 | 1552.2 | 3.9 |
| 40(1) | 12(1) | 1580.1 | 1533.7 | 0.7 |

|       |       |        |        |       |
|-------|-------|--------|--------|-------|
| 40(1) | 13(1) | 1563.2 | 1529.3 | 0.0   |
| 40(1) | 14(1) | 1490.7 | 1460.2 | 0.1   |
| 40(1) | 15(1) | 1457.3 | 1427.6 | 2.1   |
| 40(1) | 16(1) | 1413.4 | 1380.5 | 0.1   |
| 40(1) | 17(1) | 1392.1 | 1370.0 | 0.1   |
| 40(1) | 18(1) | 1357.3 | 1332.1 | 144.0 |
| 40(1) | 19(1) | 1309.5 | 1283.2 | 0.6   |
| 40(1) | 20(1) | 1233.6 | 1207.8 | 0.0   |
| 40(1) | 21(1) | 1204.3 | 1184.6 | 3.6   |
| 40(1) | 22(1) | 1088.1 | 1071.3 | 0.0   |
| 40(1) | 23(1) | 1064.4 | 1060.6 | 0.0   |
| 40(1) | 24(1) | 997.4  | 989.5  | 0.0   |
| 40(1) | 25(1) | 987.6  | 973.4  | 1.0   |
| 40(1) | 26(1) | 973.4  | 956.2  | 0.0   |
| 40(1) | 27(1) | 912.8  | 908.0  | 0.0   |
| 40(1) | 28(1) | 860.4  | 845.9  | 0.0   |
| 40(1) | 29(1) | 841.8  | 830.8  | 0.0   |
| 40(1) | 30(1) | 809.5  | 800.6  | 0.0   |
| 40(1) | 31(1) | 785.5  | 760.0  | 0.1   |
| 40(1) | 32(1) | 747.2  | 738.7  | 0.0   |
| 40(1) | 33(1) | 690.9  | 679.0  | 4.5   |
| 40(1) | 34(1) | 636.7  | 630.9  | 0.3   |
| 40(1) | 35(1) | 607.1  | 574.6  | 0.0   |
| 40(1) | 36(1) | 585.1  | 578.4  | 0.0   |
| 40(1) | 37(1) | 553.5  | 546.3  | 0.3   |
| 40(1) | 38(1) | 514.4  | 509.8  | 0.0   |
| 40(1) | 39(1) | 449.8  | 441.7  | 0.0   |
| 41(1) | 1(1)  | 3912.4 | 3734.7 | 0.1   |
| 41(1) | 2(1)  | 3858.3 | 3680.6 | 0.1   |
| 41(1) | 3(1)  | 3312.2 | 3191.9 | 0.0   |
| 41(1) | 4(1)  | 3299.9 | 3177.9 | 0.0   |
| 41(1) | 5(1)  | 3287.0 | 3165.5 | 0.0   |
| 41(1) | 6(1)  | 1914.5 | 1881.4 | 0.1   |
| 41(1) | 7(1)  | 1766.6 | 1727.5 | 0.1   |
| 41(1) | 8(1)  | 1722.2 | 1688.1 | 0.0   |
| 41(1) | 9(1)  | 1638.4 | 1606.6 | 0.1   |
| 41(1) | 10(1) | 1581.7 | 1551.8 | 0.0   |
| 41(1) | 11(1) | 1465.5 | 1439.0 | 0.0   |
| 41(1) | 12(1) | 1460.1 | 1420.1 | 0.0   |
| 41(1) | 13(1) | 1443.2 | 1415.7 | 0.0   |

|       |       |        |        |     |
|-------|-------|--------|--------|-----|
| 41(1) | 14(1) | 1370.7 | 1346.8 | 0.0 |
| 41(1) | 15(1) | 1337.3 | 1314.3 | 0.0 |
| 41(1) | 16(1) | 1293.4 | 1266.9 | 0.2 |
| 41(1) | 17(1) | 1272.1 | 1256.7 | 0.0 |
| 41(1) | 18(1) | 1237.3 | 1219.6 | 0.0 |
| 41(1) | 19(1) | 1189.5 | 1169.5 | 0.0 |
| 41(1) | 20(1) | 1113.6 | 1093.6 | 0.0 |
| 41(1) | 21(1) | 1084.3 | 1070.4 | 0.0 |
| 41(1) | 22(1) | 968.1  | 957.7  | 0.2 |
| 41(1) | 23(1) | 944.4  | 946.7  | 0.0 |
| 41(1) | 24(1) | 877.4  | 876.4  | 0.2 |
| 41(1) | 25(1) | 867.6  | 859.7  | 0.0 |
| 41(1) | 26(1) | 853.4  | 842.7  | 0.1 |
| 41(1) | 27(1) | 792.8  | 793.1  | 0.1 |
| 41(1) | 28(1) | 740.4  | 732.1  | 0.0 |
| 41(1) | 29(1) | 721.8  | 718.0  | 0.0 |
| 41(1) | 30(1) | 689.5  | 687.1  | 0.0 |
| 41(1) | 31(1) | 665.5  | 649.4  | 0.3 |
| 41(1) | 32(1) | 627.2  | 625.0  | 0.0 |
| 41(1) | 33(1) | 570.9  | 566.0  | 0.1 |
| 41(1) | 34(1) | 516.7  | 517.1  | 0.0 |
| 41(1) | 35(1) | 487.1  | 462.2  | 0.3 |
| 41(1) | 36(1) | 465.1  | 464.9  | 0.0 |
| 41(1) | 37(1) | 433.5  | 432.6  | 0.0 |
| 41(1) | 38(1) | 394.4  | 395.6  | 0.8 |
| 41(1) | 39(1) | 329.8  | 328.1  | 0.0 |
| 41(1) | 40(1) | 321.2  | 319.7  | 0.0 |
| 42(1) | 1(1)  | 3875.6 | 3700.3 | 0.0 |
| 42(1) | 2(1)  | 3821.4 | 3649.0 | 0.0 |
| 42(1) | 3(1)  | 3275.4 | 3158.0 | 0.0 |
| 42(1) | 4(1)  | 3263.1 | 3144.0 | 0.0 |
| 42(1) | 5(1)  | 3250.2 | 3131.6 | 0.0 |
| 42(1) | 6(1)  | 1877.7 | 1847.9 | 0.8 |
| 42(1) | 7(1)  | 1729.8 | 1693.9 | 0.0 |
| 42(1) | 8(1)  | 1685.3 | 1654.7 | 0.0 |
| 42(1) | 9(1)  | 1601.6 | 1573.0 | 0.0 |
| 42(1) | 10(1) | 1544.9 | 1518.4 | 0.0 |
| 42(1) | 11(1) | 1428.7 | 1405.3 | 0.1 |
| 42(1) | 12(1) | 1423.3 | 1385.2 | 1.2 |
| 42(1) | 13(1) | 1406.3 | 1382.3 | 0.0 |

|       |       |        |        |     |
|-------|-------|--------|--------|-----|
| 42(1) | 14(1) | 1333.9 | 1313.2 | 0.0 |
| 42(1) | 15(1) | 1300.4 | 1279.8 | 0.0 |
| 42(1) | 16(1) | 1256.6 | 1233.3 | 0.0 |
| 42(1) | 17(1) | 1235.3 | 1223.1 | 0.0 |
| 42(1) | 18(1) | 1200.5 | 1185.5 | 0.0 |
| 42(1) | 19(1) | 1152.7 | 1136.0 | 0.2 |
| 42(1) | 20(1) | 1076.8 | 1059.2 | 0.1 |
| 42(1) | 21(1) | 1047.5 | 1037.4 | 0.0 |
| 42(1) | 22(1) | 931.3  | 923.8  | 0.0 |
| 42(1) | 23(1) | 907.6  | 913.3  | 0.0 |
| 42(1) | 24(1) | 840.5  | 843.5  | 0.0 |
| 42(1) | 25(1) | 830.8  | 825.9  | 0.0 |
| 42(1) | 26(1) | 816.6  | 809.1  | 0.0 |
| 42(1) | 27(1) | 756.0  | 761.5  | 0.1 |
| 42(1) | 28(1) | 703.6  | 698.3  | 0.0 |
| 42(1) | 29(1) | 684.9  | 682.0  | 2.1 |
| 42(1) | 30(1) | 652.7  | 653.1  | 0.2 |
| 42(1) | 31(1) | 628.7  | 618.0  | 0.5 |
| 42(1) | 32(1) | 590.4  | 591.1  | 0.0 |
| 42(1) | 33(1) | 534.0  | 531.8  | 0.3 |
| 42(1) | 34(1) | 479.8  | 485.3  | 0.5 |
| 42(1) | 35(1) | 450.2  | 424.0  | 0.0 |
| 42(1) | 36(1) | 428.2  | 432.7  | 0.0 |
| 42(1) | 37(1) | 396.6  | 399.0  | 0.0 |
| 42(1) | 38(1) | 357.6  | 359.1  | 0.4 |
| 42(1) | 39(1) | 293.0  | 292.4  | 0.0 |
| 42(1) | 40(1) | 284.3  | 282.3  | 0.0 |
| 42(1) | 41(1) | 164.3  | 172.8  | 0.0 |

**Table S16.** Harmonic and anharmonic vibrational frequencies and their intensities of conformer **C2** as computed at the B3LYP/cc-pVTZ level of theory.

| Mode (quanta) | $\nu_{\text{harm}}$<br>( $\text{cm}^{-1}$ ) | $\nu_{\text{anharm}}$<br>( $\text{cm}^{-1}$ ) | $I_{\text{harm}}$<br>( $\text{km mol}^{-1}$ ) | $I_{\text{anharm}}$<br>( $\text{km mol}^{-1}$ ) |
|---------------|---------------------------------------------|-----------------------------------------------|-----------------------------------------------|-------------------------------------------------|
| 1(1)          | 3811.6                                      | 3637.1                                        | 86.4                                          | 73.2                                            |
| 2(1)          | 3798.5                                      | 3611.3                                        | 33.3                                          | 26.7                                            |
| 3(1)          | 3206.8                                      | 3086.7                                        | 1.4                                           | 2.4                                             |
| 4(1)          | 3183.4                                      | 3056.8                                        | 1.6                                           | 2.5                                             |
| 5(1)          | 3172.0                                      | 3036.5                                        | 3.7                                           | 5.0                                             |
| 6(1)          | 1835.9                                      | 1800.5                                        | 357.4                                         | 87.4                                            |
| 7(1)          | 1660.4                                      | 1614.9                                        | 250.2                                         | 126.1                                           |
| 8(1)          | 1626.9                                      | 1585.4                                        | 50.8                                          | 15.5                                            |
| 9(1)          | 1542.8                                      | 1508.6                                        | 56.8                                          | 29.7                                            |
| 10(1)         | 1478.5                                      | 1446.7                                        | 43.1                                          | 12.7                                            |
| 11(1)         | 1361.4                                      | 1328.6                                        | 46.2                                          | 26.6                                            |
| 12(1)         | 1352.1                                      | 1320.4                                        | 51.3                                          | 59.6                                            |
| 13(1)         | 1307.6                                      | 1273.8                                        | 385.1                                         | 184.3                                           |
| 14(1)         | 1282.4                                      | 1256.3                                        | 86.3                                          | 75.6                                            |
| 15(1)         | 1213.9                                      | 1182.0                                        | 159.4                                         | 167.7                                           |
| 16(1)         | 1198.3                                      | 1171.7                                        | 48.5                                          | 58.7                                            |
| 17(1)         | 1186.3                                      | 1161.1                                        | 146.7                                         | 77.0                                            |
| 18(1)         | 1148.1                                      | 1129.3                                        | 57.7                                          | 60.8                                            |
| 19(1)         | 1073.0                                      | 1051.1                                        | 64.3                                          | 62.1                                            |
| 20(1)         | 993.2                                       | 976.4                                         | 17.1                                          | 19.6                                            |
| 21(1)         | 980.2                                       | 962.5                                         | 2.2                                           | 1.0                                             |
| 22(1)         | 861.7                                       | 854.9                                         | 49.1                                          | 46.7                                            |
| 23(1)         | 849.2                                       | 836.4                                         | 3.7                                           | 2.7                                             |
| 24(1)         | 784.2                                       | 772.4                                         | 8.5                                           | 7.2                                             |
| 25(1)         | 766.0                                       | 756.7                                         | 4.5                                           | 4.2                                             |
| 26(1)         | 754.1                                       | 739.8                                         | 9.7                                           | 13.4                                            |
| 27(1)         | 708.3                                       | 698.2                                         | 11.1                                          | 10.5                                            |
| 28(1)         | 649.5                                       | 639.5                                         | 5.2                                           | 5.0                                             |
| 29(1)         | 601.1                                       | 594.6                                         | 15.7                                          | 14.5                                            |
| 30(1)         | 584.1                                       | 575.5                                         | 3.6                                           | 5.8                                             |
| 31(1)         | 525.6                                       | 520.2                                         | 8.0                                           | 6.9                                             |
| 32(1)         | 497.7                                       | 457.4                                         | 90.0                                          | 75.2                                            |
| 33(1)         | 472.0                                       | 462.6                                         | 5.6                                           | 6.3                                             |
| 34(1)         | 430.2                                       | 424.3                                         | 7.6                                           | 11.1                                            |
| 35(1)         | 384.7                                       | 379.8                                         | 100.3                                         | 95.6                                            |
| 36(1)         | 362.9                                       | 360.1                                         | 3.8                                           | 3.6                                             |
| 37(1)         | 308.2                                       | 304.2                                         | 4.5                                           | 4.2                                             |

|       |        |        |     |      |
|-------|--------|--------|-----|------|
| 38(1) | 267.9  | 263.5  | 7.5 | 6.2  |
| 39(1) | 228.6  | 223.6  | 1.3 | 1.1  |
| 40(1) | 179.3  | 175.9  | 4.9 | 4.5  |
| 41(1) | 95.4   | 90.3   | 0.8 | 0.7  |
| 42(1) | 62.2   | 51.9   | 4.9 | 4.7  |
| 1(2)  | 7623.1 | 7109.5 |     | 6.1  |
| 2(2)  | 7596.9 | 7054.7 |     | 3.1  |
| 3(2)  | 6413.5 | 6073.9 |     | 0.7  |
| 4(2)  | 6366.7 | 6008.3 |     | 0.6  |
| 5(2)  | 6343.9 | 5993.9 |     | 0.7  |
| 6(2)  | 3671.8 | 3582.3 |     | 5.1  |
| 7(2)  | 3320.9 | 3232.0 |     | 0.5  |
| 8(2)  | 3253.8 | 3167.8 |     | 0.8  |
| 9(2)  | 3085.6 | 3008.4 |     | 0.0  |
| 10(2) | 2957.0 | 2888.9 |     | 0.1  |
| 11(2) | 2722.7 | 2662.2 |     | 1.7  |
| 12(2) | 2704.2 | 2638.6 |     | 0.1  |
| 13(2) | 2615.2 | 2530.2 |     | 0.1  |
| 14(2) | 2564.9 | 2510.8 |     | 0.1  |
| 15(2) | 2427.8 | 2356.4 |     | 0.2  |
| 16(2) | 2396.6 | 2339.9 |     | 0.4  |
| 17(2) | 2372.5 | 2317.4 |     | 0.9  |
| 18(2) | 2296.3 | 2258.1 |     | 0.2  |
| 19(2) | 2146.0 | 2097.7 |     | 1.4  |
| 20(2) | 1986.3 | 1951.5 |     | 0.3  |
| 21(2) | 1960.4 | 1924.0 |     | 2.9  |
| 22(2) | 1723.5 | 1713.0 |     | 0.8  |
| 23(2) | 1698.5 | 1672.1 |     | 1.6  |
| 24(2) | 1568.4 | 1544.3 |     | 0.4  |
| 25(2) | 1532.0 | 1507.9 |     | 3.3  |
| 26(2) | 1508.1 | 1479.4 |     | 0.1  |
| 27(2) | 1416.5 | 1394.3 |     | 0.1  |
| 28(2) | 1299.0 | 1278.9 |     | 7.9  |
| 29(2) | 1202.2 | 1190.1 |     | 11.0 |
| 30(2) | 1168.1 | 1150.3 |     | 0.1  |
| 31(2) | 1051.2 | 1040.3 |     | 0.1  |
| 32(2) | 995.4  | 880.8  |     | 3.3  |
| 33(2) | 944.0  | 925.4  |     | 0.1  |
| 34(2) | 860.4  | 847.7  |     | 1.2  |
| 35(2) | 769.3  | 747.9  |     | 4.4  |



|       |      |        |        |     |
|-------|------|--------|--------|-----|
| 36(2) |      | 725.9  | 717.7  | 0.1 |
| 37(2) |      | 616.3  | 608.2  | 0.1 |
| 38(2) |      | 535.9  | 526.5  | 0.3 |
| 39(2) |      | 457.1  | 446.9  | 0.2 |
| 40(2) |      | 358.7  | 351.8  | 0.0 |
| 41(2) |      | 190.8  | 180.6  | 0.0 |
| 42(2) |      | 124.4  | 102.8  | 0.0 |
| 2(1)  | 1(1) | 7610.0 | 7248.2 | 0.0 |
| 3(1)  | 1(1) | 7018.3 | 6724.4 | 0.0 |
| 3(1)  | 2(1) | 7005.2 | 6698.6 | 0.0 |
| 4(1)  | 1(1) | 6994.9 | 6695.4 | 0.0 |
| 4(1)  | 2(1) | 6981.8 | 6670.5 | 0.0 |
| 4(1)  | 3(1) | 6390.1 | 6146.4 | 0.0 |
| 5(1)  | 1(1) | 6983.5 | 6685.4 | 0.0 |
| 5(1)  | 2(1) | 6970.4 | 6659.1 | 0.0 |
| 5(1)  | 3(1) | 6378.7 | 6118.2 | 0.1 |
| 5(1)  | 4(1) | 6355.3 | 6106.4 | 0.0 |
| 6(1)  | 1(1) | 5647.5 | 5437.8 | 0.0 |
| 6(1)  | 2(1) | 5634.4 | 5408.9 | 0.1 |
| 6(1)  | 3(1) | 5042.7 | 4888.2 | 0.0 |
| 6(1)  | 4(1) | 5019.2 | 4860.0 | 0.0 |
| 6(1)  | 5(1) | 5007.8 | 4849.1 | 0.0 |
| 7(1)  | 1(1) | 5472.0 | 5253.6 | 0.0 |
| 7(1)  | 2(1) | 5458.9 | 5228.7 | 0.0 |
| 7(1)  | 3(1) | 4867.2 | 4709.9 | 0.1 |
| 7(1)  | 4(1) | 4843.8 | 4678.1 | 0.1 |
| 7(1)  | 5(1) | 4832.4 | 4666.6 | 0.1 |
| 7(1)  | 6(1) | 3496.3 | 3418.1 | 0.1 |
| 8(1)  | 1(1) | 5438.5 | 5221.8 | 0.6 |
| 8(1)  | 2(1) | 5425.4 | 5197.4 | 0.0 |
| 8(1)  | 3(1) | 4833.7 | 4674.1 | 0.1 |
| 8(1)  | 4(1) | 4810.3 | 4643.8 | 0.2 |
| 8(1)  | 5(1) | 4798.9 | 4633.1 | 0.1 |
| 8(1)  | 6(1) | 3462.8 | 3386.5 | 0.0 |
| 8(1)  | 7(1) | 3287.4 | 3203.5 | 0.2 |
| 9(1)  | 1(1) | 5354.4 | 5144.3 | 0.1 |
| 9(1)  | 2(1) | 5341.3 | 5119.6 | 0.0 |
| 9(1)  | 3(1) | 4749.6 | 4597.0 | 0.0 |
| 9(1)  | 4(1) | 4726.2 | 4569.6 | 0.0 |
| 9(1)  | 5(1) | 4714.8 | 4561.7 | 0.0 |

|       |       |        |        |     |
|-------|-------|--------|--------|-----|
| 9(1)  | 6(1)  | 3378.7 | 3309.0 | 0.0 |
| 9(1)  | 7(1)  | 3203.3 | 3131.0 | 0.1 |
| 9(1)  | 8(1)  | 3169.7 | 3093.9 | 0.1 |
| 10(1) | 1(1)  | 5290.1 | 5083.4 | 0.5 |
| 10(1) | 2(1)  | 5277.0 | 5057.9 | 0.0 |
| 10(1) | 3(1)  | 4685.3 | 4540.4 | 0.1 |
| 10(1) | 4(1)  | 4661.9 | 4509.0 | 0.1 |
| 10(1) | 5(1)  | 4650.5 | 4494.9 | 0.0 |
| 10(1) | 6(1)  | 3314.4 | 3247.1 | 0.0 |
| 10(1) | 7(1)  | 3138.9 | 3048.5 | 0.1 |
| 10(1) | 8(1)  | 3105.4 | 3028.3 | 0.1 |
| 10(1) | 9(1)  | 3021.3 | 2952.2 | 0.0 |
| 11(1) | 1(1)  | 5172.9 | 4965.6 | 0.5 |
| 11(1) | 2(1)  | 5159.8 | 4943.4 | 0.0 |
| 11(1) | 3(1)  | 4568.1 | 4419.9 | 0.0 |
| 11(1) | 4(1)  | 4544.7 | 4393.2 | 0.1 |
| 11(1) | 5(1)  | 4533.3 | 4384.8 | 0.0 |
| 11(1) | 6(1)  | 3197.2 | 3133.0 | 0.0 |
| 11(1) | 7(1)  | 3021.8 | 2938.6 | 0.7 |
| 11(1) | 8(1)  | 2988.3 | 2909.8 | 0.2 |
| 11(1) | 9(1)  | 2904.2 | 2834.5 | 0.8 |
| 11(1) | 10(1) | 2839.9 | 2775.2 | 0.9 |
| 12(1) | 1(1)  | 5163.7 | 4957.0 | 0.1 |
| 12(1) | 2(1)  | 5150.6 | 4932.7 | 0.0 |
| 12(1) | 3(1)  | 4558.9 | 4410.6 | 0.2 |
| 12(1) | 4(1)  | 4535.5 | 4381.6 | 0.3 |
| 12(1) | 5(1)  | 4524.1 | 4368.3 | 0.0 |
| 12(1) | 6(1)  | 3188.0 | 3122.6 | 0.0 |
| 12(1) | 7(1)  | 3012.6 | 2933.1 | 0.1 |
| 12(1) | 8(1)  | 2979.0 | 2904.7 | 0.0 |
| 12(1) | 9(1)  | 2894.9 | 2825.9 | 0.4 |
| 12(1) | 10(1) | 2830.6 | 2763.5 | 0.1 |
| 12(1) | 11(1) | 2713.5 | 2652.1 | 0.5 |
| 13(1) | 1(1)  | 5119.2 | 4907.1 | 0.0 |
| 13(1) | 2(1)  | 5106.1 | 4879.3 | 0.9 |
| 13(1) | 3(1)  | 4514.4 | 4357.2 | 0.1 |
| 13(1) | 4(1)  | 4491.0 | 4328.4 | 0.0 |
| 13(1) | 5(1)  | 4479.6 | 4319.3 | 0.0 |
| 13(1) | 6(1)  | 3143.5 | 3069.4 | 0.1 |
| 13(1) | 7(1)  | 2968.0 | 2886.3 | 0.1 |

|       |       |        |        |     |
|-------|-------|--------|--------|-----|
| 13(1) | 8(1)  | 2934.5 | 2856.1 | 0.0 |
| 13(1) | 9(1)  | 2850.4 | 2777.4 | 0.3 |
| 13(1) | 10(1) | 2786.1 | 2716.2 | 0.0 |
| 13(1) | 11(1) | 2669.0 | 2601.2 | 0.1 |
| 13(1) | 12(1) | 2659.7 | 2591.6 | 0.1 |
| 14(1) | 1(1)  | 5094.0 | 4894.3 | 0.1 |
| 14(1) | 2(1)  | 5080.9 | 4868.1 | 0.0 |
| 14(1) | 3(1)  | 4489.2 | 4343.8 | 0.0 |
| 14(1) | 4(1)  | 4465.8 | 4314.4 | 0.0 |
| 14(1) | 5(1)  | 4454.4 | 4300.2 | 0.1 |
| 14(1) | 6(1)  | 3118.3 | 3057.4 | 0.0 |
| 14(1) | 7(1)  | 2942.9 | 2871.3 | 0.2 |
| 14(1) | 8(1)  | 2909.4 | 2839.8 | 0.0 |
| 14(1) | 9(1)  | 2825.3 | 2762.0 | 0.1 |
| 14(1) | 10(1) | 2761.0 | 2701.9 | 0.1 |
| 14(1) | 11(1) | 2643.8 | 2586.6 | 0.3 |
| 14(1) | 12(1) | 2634.6 | 2577.4 | 0.4 |
| 14(1) | 13(1) | 2590.1 | 2526.7 | 0.1 |
| 15(1) | 1(1)  | 5025.4 | 4816.2 | 0.6 |
| 15(1) | 2(1)  | 5012.4 | 4785.2 | 0.5 |
| 15(1) | 3(1)  | 4420.6 | 4266.9 | 0.0 |
| 15(1) | 4(1)  | 4397.2 | 4236.8 | 0.0 |
| 15(1) | 5(1)  | 4385.8 | 4227.7 | 0.0 |
| 15(1) | 6(1)  | 3049.8 | 2978.9 | 0.0 |
| 15(1) | 7(1)  | 2874.3 | 2794.8 | 0.0 |
| 15(1) | 8(1)  | 2840.8 | 2763.5 | 0.0 |
| 15(1) | 9(1)  | 2756.7 | 2686.6 | 0.7 |
| 15(1) | 10(1) | 2692.4 | 2624.0 | 0.4 |
| 15(1) | 11(1) | 2575.2 | 2509.1 | 0.0 |
| 15(1) | 12(1) | 2566.0 | 2499.4 | 2.0 |
| 15(1) | 13(1) | 2521.5 | 2442.4 | 0.8 |
| 15(1) | 14(1) | 2496.3 | 2435.8 | 0.3 |
| 16(1) | 1(1)  | 5009.8 | 4807.8 | 0.0 |
| 16(1) | 2(1)  | 4996.7 | 4778.2 | 0.3 |
| 16(1) | 3(1)  | 4405.0 | 4255.3 | 0.0 |
| 16(1) | 4(1)  | 4381.6 | 4228.9 | 0.1 |
| 16(1) | 5(1)  | 4370.2 | 4218.4 | 0.0 |
| 16(1) | 6(1)  | 3034.2 | 2970.4 | 0.0 |
| 16(1) | 7(1)  | 2858.7 | 2785.6 | 0.2 |
| 16(1) | 8(1)  | 2825.2 | 2755.8 | 0.0 |

|       |       |        |        |     |
|-------|-------|--------|--------|-----|
| 16(1) | 9(1)  | 2741.1 | 2676.4 | 0.2 |
| 16(1) | 10(1) | 2676.8 | 2614.9 | 0.2 |
| 16(1) | 11(1) | 2559.6 | 2501.7 | 0.0 |
| 16(1) | 12(1) | 2550.4 | 2488.8 | 1.0 |
| 16(1) | 13(1) | 2505.9 | 2436.2 | 0.3 |
| 16(1) | 14(1) | 2480.7 | 2426.8 | 0.5 |
| 16(1) | 15(1) | 2412.2 | 2347.1 | 0.1 |
| 17(1) | 1(1)  | 4997.8 | 4792.5 | 0.6 |
| 17(1) | 2(1)  | 4984.7 | 4770.8 | 0.1 |
| 17(1) | 3(1)  | 4393.0 | 4247.7 | 0.0 |
| 17(1) | 4(1)  | 4369.6 | 4216.8 | 0.0 |
| 17(1) | 5(1)  | 4358.2 | 4209.7 | 0.0 |
| 17(1) | 6(1)  | 3022.1 | 2961.2 | 0.0 |
| 17(1) | 7(1)  | 2846.7 | 2777.2 | 0.1 |
| 17(1) | 8(1)  | 2813.2 | 2742.7 | 0.3 |
| 17(1) | 9(1)  | 2729.1 | 2667.8 | 0.1 |
| 17(1) | 10(1) | 2664.8 | 2604.2 | 0.2 |
| 17(1) | 11(1) | 2547.6 | 2489.1 | 0.2 |
| 17(1) | 12(1) | 2538.4 | 2482.0 | 1.6 |
| 17(1) | 13(1) | 2493.9 | 2428.8 | 0.4 |
| 17(1) | 14(1) | 2468.7 | 2417.6 | 0.1 |
| 17(1) | 15(1) | 2400.1 | 2335.3 | 0.9 |
| 17(1) | 16(1) | 2384.5 | 2330.9 | 0.9 |
| 18(1) | 1(1)  | 4959.7 | 4766.4 | 0.0 |
| 18(1) | 2(1)  | 4946.6 | 4739.0 | 0.1 |
| 18(1) | 3(1)  | 4354.9 | 4209.2 | 0.0 |
| 18(1) | 4(1)  | 4331.5 | 4187.3 | 0.1 |
| 18(1) | 5(1)  | 4320.1 | 4176.4 | 0.0 |
| 18(1) | 6(1)  | 2984.0 | 2929.3 | 0.0 |
| 18(1) | 7(1)  | 2808.6 | 2743.2 | 0.4 |
| 18(1) | 8(1)  | 2775.1 | 2713.2 | 0.0 |
| 18(1) | 9(1)  | 2691.0 | 2635.6 | 0.1 |
| 18(1) | 10(1) | 2626.7 | 2573.1 | 0.5 |
| 18(1) | 11(1) | 2509.5 | 2460.1 | 0.1 |
| 18(1) | 12(1) | 2500.3 | 2447.8 | 0.2 |
| 18(1) | 13(1) | 2455.8 | 2397.8 | 0.5 |
| 18(1) | 14(1) | 2430.6 | 2386.1 | 0.5 |
| 18(1) | 15(1) | 2362.0 | 2308.1 | 0.0 |
| 18(1) | 16(1) | 2346.4 | 2299.1 | 0.0 |
| 18(1) | 17(1) | 2334.4 | 2290.0 | 0.4 |

|       |       |        |        |     |
|-------|-------|--------|--------|-----|
| 19(1) | 1(1)  | 4884.6 | 4688.2 | 0.0 |
| 19(1) | 2(1)  | 4871.5 | 4660.4 | 0.2 |
| 19(1) | 3(1)  | 4279.8 | 4138.0 | 0.0 |
| 19(1) | 4(1)  | 4256.3 | 4109.7 | 0.2 |
| 19(1) | 5(1)  | 4244.9 | 4099.6 | 0.2 |
| 19(1) | 6(1)  | 2908.9 | 2849.1 | 0.2 |
| 19(1) | 7(1)  | 2733.4 | 2666.4 | 0.0 |
| 19(1) | 8(1)  | 2699.9 | 2636.2 | 0.0 |
| 19(1) | 9(1)  | 2615.8 | 2558.4 | 0.0 |
| 19(1) | 10(1) | 2551.5 | 2497.3 | 0.2 |
| 19(1) | 11(1) | 2434.3 | 2381.4 | 0.2 |
| 19(1) | 12(1) | 2425.1 | 2372.3 | 0.0 |
| 19(1) | 13(1) | 2380.6 | 2315.2 | 2.2 |
| 19(1) | 14(1) | 2355.4 | 2307.7 | 0.1 |
| 19(1) | 15(1) | 2286.9 | 2229.4 | 0.3 |
| 19(1) | 16(1) | 2271.3 | 2220.9 | 0.0 |
| 19(1) | 17(1) | 2259.2 | 2211.6 | 0.0 |
| 19(1) | 18(1) | 2221.1 | 2178.7 | 0.5 |
| 20(1) | 1(1)  | 4804.7 | 4612.9 | 0.0 |
| 20(1) | 2(1)  | 4791.6 | 4587.4 | 0.0 |
| 20(1) | 3(1)  | 4199.9 | 4062.2 | 0.2 |
| 20(1) | 4(1)  | 4176.5 | 4033.3 | 0.2 |
| 20(1) | 5(1)  | 4165.1 | 4023.5 | 0.1 |
| 20(1) | 6(1)  | 2829.0 | 2777.1 | 0.0 |
| 20(1) | 7(1)  | 2653.6 | 2591.5 | 0.0 |
| 20(1) | 8(1)  | 2620.1 | 2558.7 | 0.0 |
| 20(1) | 9(1)  | 2536.0 | 2482.8 | 0.2 |
| 20(1) | 10(1) | 2471.7 | 2421.6 | 0.6 |
| 20(1) | 11(1) | 2354.5 | 2307.5 | 0.0 |
| 20(1) | 12(1) | 2345.3 | 2296.1 | 0.5 |
| 20(1) | 13(1) | 2300.8 | 2246.4 | 0.0 |
| 20(1) | 14(1) | 2275.6 | 2233.0 | 0.2 |
| 20(1) | 15(1) | 2207.0 | 2155.5 | 0.4 |
| 20(1) | 16(1) | 2191.4 | 2146.4 | 0.1 |
| 20(1) | 17(1) | 2179.4 | 2136.5 | 0.3 |
| 20(1) | 18(1) | 2141.3 | 2105.3 | 0.4 |
| 20(1) | 19(1) | 2066.1 | 2027.1 | 0.2 |
| 21(1) | 1(1)  | 4791.8 | 4599.5 | 0.0 |
| 21(1) | 2(1)  | 4778.7 | 4573.9 | 0.0 |
| 21(1) | 3(1)  | 4187.0 | 4043.5 | 0.0 |

|       |       |        |        |     |
|-------|-------|--------|--------|-----|
| 21(1) | 4(1)  | 4163.6 | 4021.4 | 0.0 |
| 21(1) | 5(1)  | 4152.2 | 3999.7 | 0.0 |
| 21(1) | 6(1)  | 2816.1 | 2762.8 | 0.0 |
| 21(1) | 7(1)  | 2640.6 | 2578.0 | 0.0 |
| 21(1) | 8(1)  | 2607.1 | 2547.3 | 0.0 |
| 21(1) | 9(1)  | 2523.0 | 2470.2 | 0.0 |
| 21(1) | 10(1) | 2458.7 | 2409.7 | 0.0 |
| 21(1) | 11(1) | 2341.6 | 2294.2 | 0.0 |
| 21(1) | 12(1) | 2332.3 | 2283.5 | 0.0 |
| 21(1) | 13(1) | 2287.8 | 2232.8 | 0.0 |
| 21(1) | 14(1) | 2262.6 | 2219.7 | 0.0 |
| 21(1) | 15(1) | 2194.1 | 2142.5 | 0.0 |
| 21(1) | 16(1) | 2178.5 | 2132.6 | 0.0 |
| 21(1) | 17(1) | 2166.5 | 2123.4 | 0.0 |
| 21(1) | 18(1) | 2128.3 | 2091.3 | 0.0 |
| 21(1) | 19(1) | 2053.2 | 2013.7 | 0.1 |
| 21(1) | 20(1) | 1973.4 | 1938.7 | 0.3 |
| 22(1) | 1(1)  | 4673.3 | 4491.2 | 0.0 |
| 22(1) | 2(1)  | 4660.2 | 4466.2 | 0.0 |
| 22(1) | 3(1)  | 4068.5 | 3941.1 | 0.0 |
| 22(1) | 4(1)  | 4045.1 | 3902.2 | 0.0 |
| 22(1) | 5(1)  | 4033.7 | 3902.8 | 0.0 |
| 22(1) | 6(1)  | 2697.6 | 2655.6 | 0.0 |
| 22(1) | 7(1)  | 2522.2 | 2470.2 | 0.0 |
| 22(1) | 8(1)  | 2488.7 | 2438.7 | 0.0 |
| 22(1) | 9(1)  | 2404.6 | 2364.5 | 0.0 |
| 22(1) | 10(1) | 2340.2 | 2300.2 | 0.0 |
| 22(1) | 11(1) | 2223.1 | 2187.0 | 0.0 |
| 22(1) | 12(1) | 2213.9 | 2176.0 | 0.0 |
| 22(1) | 13(1) | 2169.3 | 2125.0 | 0.0 |
| 22(1) | 14(1) | 2144.2 | 2112.4 | 0.0 |
| 22(1) | 15(1) | 2075.6 | 2032.0 | 0.0 |
| 22(1) | 16(1) | 2060.0 | 2025.9 | 0.0 |
| 22(1) | 17(1) | 2048.0 | 2014.2 | 0.0 |
| 22(1) | 18(1) | 2009.9 | 1984.3 | 0.0 |
| 22(1) | 19(1) | 1934.7 | 1905.4 | 0.0 |
| 22(1) | 20(1) | 1854.9 | 1830.7 | 0.0 |
| 22(1) | 21(1) | 1841.9 | 1819.2 | 0.2 |
| 23(1) | 1(1)  | 4660.8 | 4473.2 | 0.0 |
| 23(1) | 2(1)  | 4647.7 | 4447.6 | 0.0 |

|       |       |        |        |     |
|-------|-------|--------|--------|-----|
| 23(1) | 3(1)  | 4056.0 | 3916.6 | 0.0 |
| 23(1) | 4(1)  | 4032.6 | 3894.5 | 0.0 |
| 23(1) | 5(1)  | 4021.2 | 3881.6 | 0.0 |
| 23(1) | 6(1)  | 2685.1 | 2636.5 | 0.0 |
| 23(1) | 7(1)  | 2509.7 | 2452.0 | 0.0 |
| 23(1) | 8(1)  | 2476.2 | 2421.1 | 0.0 |
| 23(1) | 9(1)  | 2392.1 | 2343.6 | 0.0 |
| 23(1) | 10(1) | 2327.7 | 2282.0 | 0.0 |
| 23(1) | 11(1) | 2210.6 | 2168.5 | 0.0 |
| 23(1) | 12(1) | 2201.3 | 2159.0 | 0.0 |
| 23(1) | 13(1) | 2156.8 | 2105.2 | 0.0 |
| 23(1) | 14(1) | 2131.7 | 2092.9 | 0.0 |
| 23(1) | 15(1) | 2063.1 | 2015.6 | 0.0 |
| 23(1) | 16(1) | 2047.5 | 2007.2 | 0.0 |
| 23(1) | 17(1) | 2035.5 | 1996.8 | 0.0 |
| 23(1) | 18(1) | 1997.4 | 1966.7 | 0.0 |
| 23(1) | 19(1) | 1922.2 | 1887.0 | 0.1 |
| 23(1) | 20(1) | 1842.4 | 1812.3 | 0.0 |
| 23(1) | 21(1) | 1829.4 | 1796.1 | 0.9 |
| 23(1) | 22(1) | 1711.0 | 1692.1 | 1.3 |
| 24(1) | 1(1)  | 4595.8 | 4409.2 | 0.0 |
| 24(1) | 2(1)  | 4582.7 | 4383.6 | 0.0 |
| 24(1) | 3(1)  | 3991.0 | 3858.6 | 0.0 |
| 24(1) | 4(1)  | 3967.6 | 3830.2 | 0.0 |
| 24(1) | 5(1)  | 3956.2 | 3819.5 | 0.0 |
| 24(1) | 6(1)  | 2620.1 | 2570.9 | 0.1 |
| 24(1) | 7(1)  | 2444.6 | 2389.1 | 0.1 |
| 24(1) | 8(1)  | 2411.1 | 2357.6 | 0.0 |
| 24(1) | 9(1)  | 2327.0 | 2280.2 | 0.0 |
| 24(1) | 10(1) | 2262.7 | 2218.7 | 0.0 |
| 24(1) | 11(1) | 2145.6 | 2104.0 | 0.0 |
| 24(1) | 12(1) | 2136.3 | 2093.8 | 0.0 |
| 24(1) | 13(1) | 2091.8 | 2040.8 | 0.1 |
| 24(1) | 14(1) | 2066.6 | 2029.7 | 0.0 |
| 24(1) | 15(1) | 1998.1 | 1950.0 | 0.0 |
| 24(1) | 16(1) | 1982.5 | 1941.6 | 0.1 |
| 24(1) | 17(1) | 1970.5 | 1933.2 | 0.1 |
| 24(1) | 18(1) | 1932.3 | 1901.7 | 0.0 |
| 24(1) | 19(1) | 1857.2 | 1822.0 | 0.1 |
| 24(1) | 20(1) | 1777.4 | 1748.5 | 0.1 |

|       |       |        |        |       |
|-------|-------|--------|--------|-------|
| 24(1) | 21(1) | 1764.4 | 1734.2 | 0.6   |
| 24(1) | 22(1) | 1645.9 | 1627.2 | 0.9   |
| 24(1) | 23(1) | 1633.4 | 1609.2 | 1.0   |
| 25(1) | 1(1)  | 4577.6 | 4391.7 | 0.0   |
| 25(1) | 2(1)  | 4564.5 | 4365.2 | 0.1   |
| 25(1) | 3(1)  | 3972.8 | 3841.9 | 0.0   |
| 25(1) | 4(1)  | 3949.4 | 3813.5 | 0.0   |
| 25(1) | 5(1)  | 3938.0 | 3802.6 | 0.1   |
| 25(1) | 6(1)  | 2601.9 | 2552.7 | 0.1   |
| 25(1) | 7(1)  | 2426.4 | 2371.2 | 0.7   |
| 25(1) | 8(1)  | 2392.9 | 2339.4 | 0.2   |
| 25(1) | 9(1)  | 2308.8 | 2262.9 | 0.1   |
| 25(1) | 10(1) | 2244.5 | 2200.8 | 0.0   |
| 25(1) | 11(1) | 2127.4 | 2085.7 | 0.1   |
| 25(1) | 12(1) | 2118.1 | 2075.2 | 0.3   |
| 25(1) | 13(1) | 2073.6 | 2023.7 | 0.5   |
| 25(1) | 14(1) | 2048.4 | 2011.0 | 0.3   |
| 25(1) | 15(1) | 1979.9 | 1934.3 | 0.3   |
| 25(1) | 16(1) | 1964.3 | 1925.2 | 1.3   |
| 25(1) | 17(1) | 1952.3 | 1915.7 | 0.6   |
| 25(1) | 18(1) | 1914.1 | 1883.5 | 1.3   |
| 25(1) | 19(1) | 1839.0 | 1805.2 | 112.2 |
| 25(1) | 20(1) | 1759.2 | 1730.7 | 0.1   |
| 25(1) | 21(1) | 1746.2 | 1716.8 | 0.0   |
| 25(1) | 22(1) | 1627.7 | 1609.7 | 24.4  |
| 25(1) | 23(1) | 1615.2 | 1590.5 | 0.2   |
| 25(1) | 24(1) | 1550.2 | 1526.4 | 0.1   |
| 26(1) | 1(1)  | 4565.6 | 4376.7 | 0.0   |
| 26(1) | 2(1)  | 4552.5 | 4350.2 | 0.0   |
| 26(1) | 3(1)  | 3960.8 | 3827.1 | 0.1   |
| 26(1) | 4(1)  | 3937.4 | 3799.1 | 0.0   |
| 26(1) | 5(1)  | 3926.0 | 3787.8 | 0.2   |
| 26(1) | 6(1)  | 2589.9 | 2539.0 | 0.0   |
| 26(1) | 7(1)  | 2414.5 | 2356.1 | 0.3   |
| 26(1) | 8(1)  | 2381.0 | 2325.0 | 0.1   |
| 26(1) | 9(1)  | 2296.9 | 2247.3 | 0.2   |
| 26(1) | 10(1) | 2232.6 | 2185.8 | 0.1   |
| 26(1) | 11(1) | 2115.4 | 2071.3 | 0.0   |
| 26(1) | 12(1) | 2106.2 | 2060.2 | 0.2   |
| 26(1) | 13(1) | 2061.7 | 2008.4 | 0.8   |



|       |       |        |        |      |
|-------|-------|--------|--------|------|
| 26(1) | 14(1) | 2036.5 | 1997.8 | 0.0  |
| 26(1) | 15(1) | 1967.9 | 1919.4 | 2.2  |
| 26(1) | 16(1) | 1952.3 | 1910.2 | 0.1  |
| 26(1) | 17(1) | 1940.3 | 1902.3 | 0.3  |
| 26(1) | 18(1) | 1902.2 | 1868.5 | 0.1  |
| 26(1) | 19(1) | 1827.0 | 1788.8 | 18.7 |
| 26(1) | 20(1) | 1747.2 | 1716.0 | 0.0  |
| 26(1) | 21(1) | 1734.3 | 1702.0 | 0.0  |
| 26(1) | 22(1) | 1615.8 | 1594.6 | 0.0  |
| 26(1) | 23(1) | 1603.3 | 1575.8 | 0.0  |
| 26(1) | 24(1) | 1538.3 | 1511.8 | 0.1  |
| 26(1) | 25(1) | 1520.1 | 1493.7 | 0.4  |
| 27(1) | 1(1)  | 4519.8 | 4334.1 | 0.0  |
| 27(1) | 2(1)  | 4506.7 | 4308.7 | 0.0  |
| 27(1) | 3(1)  | 3915.0 | 3784.1 | 0.0  |
| 27(1) | 4(1)  | 3891.6 | 3754.9 | 0.0  |
| 27(1) | 5(1)  | 3880.2 | 3745.3 | 0.0  |
| 27(1) | 6(1)  | 2544.1 | 2496.8 | 0.0  |
| 27(1) | 7(1)  | 2368.7 | 2313.3 | 0.0  |
| 27(1) | 8(1)  | 2335.2 | 2282.4 | 0.0  |
| 27(1) | 9(1)  | 2251.1 | 2204.4 | 0.0  |
| 27(1) | 10(1) | 2186.8 | 2143.4 | 0.0  |
| 27(1) | 11(1) | 2069.6 | 2028.2 | 0.0  |
| 27(1) | 12(1) | 2060.4 | 2017.7 | 0.0  |
| 27(1) | 13(1) | 2015.9 | 1967.4 | 0.0  |
| 27(1) | 14(1) | 1990.7 | 1954.0 | 0.0  |
| 27(1) | 15(1) | 1922.1 | 1876.6 | 0.1  |
| 27(1) | 16(1) | 1906.5 | 1867.8 | 0.1  |
| 27(1) | 17(1) | 1894.5 | 1857.8 | 0.2  |
| 27(1) | 18(1) | 1856.4 | 1825.7 | 0.4  |
| 27(1) | 19(1) | 1781.2 | 1746.9 | 1.3  |
| 27(1) | 20(1) | 1701.4 | 1673.3 | 0.3  |
| 27(1) | 21(1) | 1688.5 | 1660.7 | 0.1  |
| 27(1) | 22(1) | 1570.0 | 1552.7 | 0.5  |
| 27(1) | 23(1) | 1557.5 | 1534.1 | 2.1  |
| 27(1) | 24(1) | 1492.5 | 1469.7 | 1.9  |
| 27(1) | 25(1) | 1474.3 | 1451.0 | 2.8  |
| 27(1) | 26(1) | 1462.3 | 1436.8 | 0.4  |
| 28(1) | 1(1)  | 4461.1 | 4276.6 | 0.0  |
| 28(1) | 2(1)  | 4448.0 | 4250.7 | 0.0  |

|       |       |        |        |     |
|-------|-------|--------|--------|-----|
| 28(1) | 3(1)  | 3856.3 | 3725.4 | 0.0 |
| 28(1) | 4(1)  | 3832.8 | 3698.2 | 0.0 |
| 28(1) | 5(1)  | 3821.4 | 3687.4 | 0.0 |
| 28(1) | 6(1)  | 2485.4 | 2439.9 | 0.0 |
| 28(1) | 7(1)  | 2309.9 | 2255.9 | 0.0 |
| 28(1) | 8(1)  | 2276.4 | 2224.1 | 0.0 |
| 28(1) | 9(1)  | 2192.3 | 2149.0 | 0.0 |
| 28(1) | 10(1) | 2128.0 | 2084.6 | 0.0 |
| 28(1) | 11(1) | 2010.8 | 1971.1 | 0.0 |
| 28(1) | 12(1) | 2001.6 | 1958.9 | 0.0 |
| 28(1) | 13(1) | 1957.1 | 1909.8 | 0.0 |
| 28(1) | 14(1) | 1931.9 | 1896.2 | 0.0 |
| 28(1) | 15(1) | 1863.4 | 1819.0 | 0.4 |
| 28(1) | 16(1) | 1847.8 | 1810.0 | 2.0 |
| 28(1) | 17(1) | 1835.7 | 1802.7 | 0.0 |
| 28(1) | 18(1) | 1797.6 | 1769.1 | 0.1 |
| 28(1) | 19(1) | 1722.5 | 1690.1 | 0.1 |
| 28(1) | 20(1) | 1642.6 | 1614.3 | 0.9 |
| 28(1) | 21(1) | 1629.7 | 1602.5 | 3.0 |
| 28(1) | 22(1) | 1511.2 | 1493.6 | 8.4 |
| 28(1) | 23(1) | 1498.7 | 1476.0 | 1.3 |
| 28(1) | 24(1) | 1433.7 | 1412.1 | 0.5 |
| 28(1) | 25(1) | 1415.5 | 1393.8 | 0.3 |
| 28(1) | 26(1) | 1403.5 | 1379.0 | 0.3 |
| 28(1) | 27(1) | 1357.7 | 1337.8 | 1.7 |
| 29(1) | 1(1)  | 4412.7 | 4231.8 | 0.0 |
| 29(1) | 2(1)  | 4399.6 | 4204.8 | 0.1 |
| 29(1) | 3(1)  | 3807.9 | 3681.8 | 0.1 |
| 29(1) | 4(1)  | 3784.5 | 3653.7 | 0.0 |
| 29(1) | 5(1)  | 3773.1 | 3643.0 | 0.0 |
| 29(1) | 6(1)  | 2437.0 | 2393.5 | 0.0 |
| 29(1) | 7(1)  | 2261.5 | 2210.7 | 0.0 |
| 29(1) | 8(1)  | 2228.0 | 2179.6 | 0.0 |
| 29(1) | 9(1)  | 2143.9 | 2102.2 | 0.1 |
| 29(1) | 10(1) | 2079.6 | 2040.7 | 0.0 |
| 29(1) | 11(1) | 1962.5 | 1926.1 | 0.0 |
| 29(1) | 12(1) | 1953.2 | 1915.4 | 0.0 |
| 29(1) | 13(1) | 1908.7 | 1863.7 | 0.2 |
| 29(1) | 14(1) | 1883.5 | 1851.6 | 0.0 |
| 29(1) | 15(1) | 1815.0 | 1774.6 | 6.6 |

|       |       |        |        |      |
|-------|-------|--------|--------|------|
| 29(1) | 16(1) | 1799.4 | 1763.5 | 0.7  |
| 29(1) | 17(1) | 1787.4 | 1755.8 | 0.2  |
| 29(1) | 18(1) | 1749.2 | 1723.6 | 0.2  |
| 29(1) | 19(1) | 1674.1 | 1645.2 | 7.4  |
| 29(1) | 20(1) | 1594.3 | 1570.9 | 0.1  |
| 29(1) | 21(1) | 1581.3 | 1556.8 | 0.1  |
| 29(1) | 22(1) | 1462.8 | 1449.4 | 0.0  |
| 29(1) | 23(1) | 1450.3 | 1430.8 | 0.0  |
| 29(1) | 24(1) | 1385.3 | 1367.0 | 0.5  |
| 29(1) | 25(1) | 1367.1 | 1349.6 | 1.9  |
| 29(1) | 26(1) | 1355.2 | 1335.5 | 3.4  |
| 29(1) | 27(1) | 1309.4 | 1291.8 | 51.7 |
| 29(1) | 28(1) | 1250.6 | 1233.8 | 0.1  |
| 30(1) | 1(1)  | 4395.6 | 4212.8 | 0.0  |
| 30(1) | 2(1)  | 4382.5 | 4186.1 | 0.0  |
| 30(1) | 3(1)  | 3790.8 | 3662.8 | 0.0  |
| 30(1) | 4(1)  | 3767.4 | 3634.6 | 0.0  |
| 30(1) | 5(1)  | 3756.0 | 3624.2 | 0.0  |
| 30(1) | 6(1)  | 2419.9 | 2376.4 | 0.0  |
| 30(1) | 7(1)  | 2244.5 | 2192.3 | 0.0  |
| 30(1) | 8(1)  | 2211.0 | 2160.9 | 0.0  |
| 30(1) | 9(1)  | 2126.9 | 2082.6 | 0.0  |
| 30(1) | 10(1) | 2062.6 | 2021.8 | 0.0  |
| 30(1) | 11(1) | 1945.4 | 1907.3 | 0.0  |
| 30(1) | 12(1) | 1936.2 | 1895.9 | 0.1  |
| 30(1) | 13(1) | 1891.7 | 1844.6 | 0.0  |
| 30(1) | 14(1) | 1866.5 | 1832.3 | 0.1  |
| 30(1) | 15(1) | 1797.9 | 1754.7 | 1.5  |
| 30(1) | 16(1) | 1782.3 | 1745.7 | 0.4  |
| 30(1) | 17(1) | 1770.3 | 1736.7 | 0.3  |
| 30(1) | 18(1) | 1732.2 | 1704.2 | 0.1  |
| 30(1) | 19(1) | 1657.0 | 1626.3 | 8.4  |
| 30(1) | 20(1) | 1577.2 | 1551.2 | 1.4  |
| 30(1) | 21(1) | 1564.3 | 1537.9 | 0.0  |
| 30(1) | 22(1) | 1445.8 | 1430.4 | 0.2  |
| 30(1) | 23(1) | 1433.3 | 1411.8 | 0.1  |
| 30(1) | 24(1) | 1368.3 | 1348.4 | 6.3  |
| 30(1) | 25(1) | 1350.1 | 1329.8 | 0.6  |
| 30(1) | 26(1) | 1338.1 | 1314.8 | 1.5  |
| 30(1) | 27(1) | 1292.3 | 1273.6 | 0.4  |

|       |       |        |        |       |
|-------|-------|--------|--------|-------|
| 30(1) | 28(1) | 1233.5 | 1215.3 | 0.3   |
| 30(1) | 29(1) | 1185.2 | 1170.2 | 0.2   |
| 31(1) | 1(1)  | 4337.2 | 4157.3 | 0.0   |
| 31(1) | 2(1)  | 4324.1 | 4131.4 | 0.0   |
| 31(1) | 3(1)  | 3732.4 | 3607.5 | 0.0   |
| 31(1) | 4(1)  | 3708.9 | 3579.5 | 0.1   |
| 31(1) | 5(1)  | 3697.5 | 3568.6 | 0.0   |
| 31(1) | 6(1)  | 2361.5 | 2322.1 | 0.0   |
| 31(1) | 7(1)  | 2186.0 | 2135.7 | 0.3   |
| 31(1) | 8(1)  | 2152.5 | 2105.4 | 0.1   |
| 31(1) | 9(1)  | 2068.4 | 2027.9 | 0.0   |
| 31(1) | 10(1) | 2004.1 | 1965.2 | 0.0   |
| 31(1) | 11(1) | 1886.9 | 1851.4 | 0.1   |
| 31(1) | 12(1) | 1877.7 | 1841.2 | 0.1   |
| 31(1) | 13(1) | 1833.2 | 1788.9 | 166.2 |
| 31(1) | 14(1) | 1808.0 | 1778.2 | 0.2   |
| 31(1) | 15(1) | 1739.5 | 1699.7 | 0.1   |
| 31(1) | 16(1) | 1723.9 | 1690.8 | 0.2   |
| 31(1) | 17(1) | 1711.8 | 1681.6 | 0.9   |
| 31(1) | 18(1) | 1673.7 | 1650.5 | 8.0   |
| 31(1) | 19(1) | 1598.6 | 1570.7 | 0.5   |
| 31(1) | 20(1) | 1518.7 | 1496.7 | 1.1   |
| 31(1) | 21(1) | 1505.8 | 1482.6 | 0.1   |
| 31(1) | 22(1) | 1387.3 | 1374.9 | 0.0   |
| 31(1) | 23(1) | 1374.8 | 1356.5 | 0.1   |
| 31(1) | 24(1) | 1309.8 | 1292.4 | 3.0   |
| 31(1) | 25(1) | 1291.6 | 1274.8 | 5.8   |
| 31(1) | 26(1) | 1279.6 | 1258.7 | 35.6  |
| 31(1) | 27(1) | 1233.8 | 1217.2 | 0.0   |
| 31(1) | 28(1) | 1175.1 | 1159.3 | 0.3   |
| 31(1) | 29(1) | 1126.7 | 1114.9 | 0.1   |
| 31(1) | 30(1) | 1109.6 | 1095.9 | 0.5   |
| 32(1) | 1(1)  | 4309.3 | 4094.5 | 0.0   |
| 32(1) | 2(1)  | 4296.2 | 4058.8 | 1.4   |
| 32(1) | 3(1)  | 3704.5 | 3544.8 | 0.0   |
| 32(1) | 4(1)  | 3681.1 | 3516.7 | 0.0   |
| 32(1) | 5(1)  | 3669.7 | 3505.0 | 0.2   |
| 32(1) | 6(1)  | 2333.6 | 2256.7 | 0.0   |
| 32(1) | 7(1)  | 2158.2 | 2074.8 | 0.0   |
| 32(1) | 8(1)  | 2124.6 | 2043.6 | 0.0   |

|       |       |        |        |      |
|-------|-------|--------|--------|------|
| 32(1) | 9(1)  | 2040.5 | 1965.9 | 0.0  |
| 32(1) | 10(1) | 1976.2 | 1904.5 | 0.0  |
| 32(1) | 11(1) | 1859.1 | 1789.8 | 0.2  |
| 32(1) | 12(1) | 1849.8 | 1779.6 | 0.2  |
| 32(1) | 13(1) | 1805.3 | 1723.8 | 2.0  |
| 32(1) | 14(1) | 1780.2 | 1714.5 | 0.2  |
| 32(1) | 15(1) | 1711.6 | 1639.0 | 0.5  |
| 32(1) | 16(1) | 1696.0 | 1629.5 | 0.1  |
| 32(1) | 17(1) | 1684.0 | 1619.2 | 0.0  |
| 32(1) | 18(1) | 1645.9 | 1588.4 | 0.0  |
| 32(1) | 19(1) | 1570.7 | 1510.3 | 0.2  |
| 32(1) | 20(1) | 1490.9 | 1431.4 | 0.0  |
| 32(1) | 21(1) | 1477.9 | 1418.0 | 27.1 |
| 32(1) | 22(1) | 1359.5 | 1312.0 | 0.1  |
| 32(1) | 23(1) | 1346.9 | 1294.7 | 8.0  |
| 32(1) | 24(1) | 1281.9 | 1227.9 | 0.7  |
| 32(1) | 25(1) | 1263.7 | 1211.8 | 1.5  |
| 32(1) | 26(1) | 1251.8 | 1197.1 | 1.0  |
| 32(1) | 27(1) | 1206.0 | 1148.9 | 20.5 |
| 32(1) | 28(1) | 1147.2 | 1096.7 | 2.3  |
| 32(1) | 29(1) | 1098.8 | 1052.3 | 0.4  |
| 32(1) | 30(1) | 1081.8 | 1032.4 | 0.1  |
| 32(1) | 31(1) | 1023.3 | 977.5  | 0.0  |
| 33(1) | 1(1)  | 4283.6 | 4099.7 | 0.0  |
| 33(1) | 2(1)  | 4270.5 | 4074.0 | 0.0  |
| 33(1) | 3(1)  | 3678.8 | 3549.7 | 0.0  |
| 33(1) | 4(1)  | 3655.4 | 3521.7 | 0.0  |
| 33(1) | 5(1)  | 3644.0 | 3510.4 | 0.0  |
| 33(1) | 6(1)  | 2307.9 | 2263.1 | 0.0  |
| 33(1) | 7(1)  | 2132.5 | 2078.9 | 0.0  |
| 33(1) | 8(1)  | 2098.9 | 2047.7 | 0.0  |
| 33(1) | 9(1)  | 2014.8 | 1970.0 | 0.0  |
| 33(1) | 10(1) | 1950.5 | 1910.1 | 0.0  |
| 33(1) | 11(1) | 1833.4 | 1793.5 | 1.9  |
| 33(1) | 12(1) | 1824.1 | 1784.3 | 0.0  |
| 33(1) | 13(1) | 1779.6 | 1733.0 | 0.1  |
| 33(1) | 14(1) | 1754.5 | 1719.3 | 0.0  |
| 33(1) | 15(1) | 1685.9 | 1642.4 | 0.0  |
| 33(1) | 16(1) | 1670.3 | 1633.4 | 2.7  |
| 33(1) | 17(1) | 1658.3 | 1624.0 | 14.8 |

|       |       |        |        |     |
|-------|-------|--------|--------|-----|
| 33(1) | 18(1) | 1620.2 | 1591.5 | 0.2 |
| 33(1) | 19(1) | 1545.0 | 1514.0 | 5.3 |
| 33(1) | 20(1) | 1465.2 | 1438.5 | 0.4 |
| 33(1) | 21(1) | 1452.2 | 1424.2 | 3.7 |
| 33(1) | 22(1) | 1333.8 | 1317.0 | 2.6 |
| 33(1) | 23(1) | 1321.3 | 1298.4 | 0.4 |
| 33(1) | 24(1) | 1256.2 | 1233.7 | 1.8 |
| 33(1) | 25(1) | 1238.0 | 1216.7 | 0.1 |
| 33(1) | 26(1) | 1226.1 | 1202.7 | 0.1 |
| 33(1) | 27(1) | 1180.3 | 1160.4 | 4.6 |
| 33(1) | 28(1) | 1121.5 | 1100.7 | 0.4 |
| 33(1) | 29(1) | 1073.1 | 1057.0 | 0.0 |
| 33(1) | 30(1) | 1056.1 | 1037.9 | 1.6 |
| 33(1) | 31(1) | 997.6  | 982.8  | 0.6 |
| 33(1) | 32(1) | 969.7  | 918.1  | 0.5 |
| 34(1) | 1(1)  | 4241.8 | 4061.2 | 0.0 |
| 34(1) | 2(1)  | 4228.7 | 4035.1 | 0.0 |
| 34(1) | 3(1)  | 3637.0 | 3511.6 | 0.0 |
| 34(1) | 4(1)  | 3613.5 | 3483.5 | 0.0 |
| 34(1) | 5(1)  | 3602.1 | 3472.6 | 0.0 |
| 34(1) | 6(1)  | 2266.1 | 2223.8 | 0.0 |
| 34(1) | 7(1)  | 2090.6 | 2041.1 | 0.0 |
| 34(1) | 8(1)  | 2057.1 | 2010.0 | 0.0 |
| 34(1) | 9(1)  | 1973.0 | 1932.2 | 0.0 |
| 34(1) | 10(1) | 1908.7 | 1870.7 | 0.2 |
| 34(1) | 11(1) | 1791.5 | 1756.6 | 0.7 |
| 34(1) | 12(1) | 1782.3 | 1745.7 | 0.3 |
| 34(1) | 13(1) | 1737.8 | 1694.3 | 0.9 |
| 34(1) | 14(1) | 1712.6 | 1681.2 | 0.2 |
| 34(1) | 15(1) | 1644.1 | 1604.2 | 0.3 |
| 34(1) | 16(1) | 1628.5 | 1595.1 | 3.3 |
| 34(1) | 17(1) | 1616.4 | 1586.4 | 1.8 |
| 34(1) | 18(1) | 1578.3 | 1554.0 | 0.4 |
| 34(1) | 19(1) | 1503.2 | 1474.8 | 0.1 |
| 34(1) | 20(1) | 1423.3 | 1400.7 | 0.0 |
| 34(1) | 21(1) | 1410.4 | 1386.6 | 0.9 |
| 34(1) | 22(1) | 1291.9 | 1279.2 | 2.6 |
| 34(1) | 23(1) | 1279.4 | 1261.6 | 4.4 |
| 34(1) | 24(1) | 1214.4 | 1196.9 | 0.3 |
| 34(1) | 25(1) | 1196.2 | 1178.8 | 0.7 |

|       |       |        |        |      |
|-------|-------|--------|--------|------|
| 34(1) | 26(1) | 1184.2 | 1162.6 | 87.4 |
| 34(1) | 27(1) | 1138.4 | 1120.2 | 1.0  |
| 34(1) | 28(1) | 1079.7 | 1063.3 | 0.0  |
| 34(1) | 29(1) | 1031.3 | 1018.7 | 0.0  |
| 34(1) | 30(1) | 1014.2 | 1000.1 | 0.1  |
| 34(1) | 31(1) | 955.8  | 944.5  | 0.1  |
| 34(1) | 32(1) | 927.9  | 877.8  | 0.8  |
| 34(1) | 33(1) | 902.2  | 885.8  | 0.0  |
| 35(1) | 1(1)  | 4196.2 | 4018.8 | 1.5  |
| 35(1) | 2(1)  | 4183.1 | 3990.7 | 0.0  |
| 35(1) | 3(1)  | 3591.4 | 3467.4 | 0.0  |
| 35(1) | 4(1)  | 3568.0 | 3442.3 | 0.0  |
| 35(1) | 5(1)  | 3556.6 | 3428.2 | 0.0  |
| 35(1) | 6(1)  | 2220.5 | 2180.9 | 0.0  |
| 35(1) | 7(1)  | 2045.1 | 1996.6 | 0.0  |
| 35(1) | 8(1)  | 2011.6 | 1964.5 | 0.0  |
| 35(1) | 9(1)  | 1927.5 | 1887.6 | 0.0  |
| 35(1) | 10(1) | 1863.2 | 1823.6 | 0.0  |
| 35(1) | 11(1) | 1746.0 | 1713.2 | 0.0  |
| 35(1) | 12(1) | 1736.8 | 1699.1 | 0.0  |
| 35(1) | 13(1) | 1692.3 | 1650.4 | 0.0  |
| 35(1) | 14(1) | 1667.1 | 1636.9 | 0.0  |
| 35(1) | 15(1) | 1598.5 | 1556.3 | 0.0  |
| 35(1) | 16(1) | 1582.9 | 1549.9 | 0.0  |
| 35(1) | 17(1) | 1570.9 | 1546.7 | 0.0  |
| 35(1) | 18(1) | 1532.8 | 1509.3 | 0.0  |
| 35(1) | 19(1) | 1457.6 | 1431.4 | 0.0  |
| 35(1) | 20(1) | 1377.8 | 1356.3 | 0.0  |
| 35(1) | 21(1) | 1364.9 | 1343.0 | 4.7  |
| 35(1) | 22(1) | 1246.4 | 1242.7 | 32.0 |
| 35(1) | 23(1) | 1233.9 | 1217.9 | 3.1  |
| 35(1) | 24(1) | 1168.9 | 1152.9 | 2.9  |
| 35(1) | 25(1) | 1150.7 | 1134.4 | 0.0  |
| 35(1) | 26(1) | 1138.7 | 1113.2 | 0.0  |
| 35(1) | 27(1) | 1092.9 | 1077.5 | 0.6  |
| 35(1) | 28(1) | 1034.1 | 1015.5 | 3.9  |
| 35(1) | 29(1) | 985.8  | 974.7  | 0.0  |
| 35(1) | 30(1) | 968.7  | 955.3  | 0.0  |
| 35(1) | 31(1) | 910.3  | 900.4  | 0.0  |
| 35(1) | 32(1) | 882.4  | 838.8  | 0.0  |

|       |       |        |        |      |
|-------|-------|--------|--------|------|
| 35(1) | 33(1) | 856.7  | 842.6  | 1.3  |
| 35(1) | 34(1) | 814.8  | 804.7  | 0.1  |
| 36(1) | 1(1)  | 4174.5 | 3996.2 | 0.0  |
| 36(1) | 2(1)  | 4161.4 | 3969.9 | 0.0  |
| 36(1) | 3(1)  | 3569.7 | 3446.3 | 0.0  |
| 36(1) | 4(1)  | 3546.3 | 3418.1 | 0.0  |
| 36(1) | 5(1)  | 3534.9 | 3407.3 | 0.0  |
| 36(1) | 6(1)  | 2198.8 | 2159.2 | 0.1  |
| 36(1) | 7(1)  | 2023.4 | 1974.9 | 0.3  |
| 36(1) | 8(1)  | 1989.9 | 1944.6 | 0.0  |
| 36(1) | 9(1)  | 1905.8 | 1866.2 | 0.1  |
| 36(1) | 10(1) | 1841.5 | 1805.3 | 2.8  |
| 36(1) | 11(1) | 1724.3 | 1691.9 | 3.9  |
| 36(1) | 12(1) | 1715.1 | 1679.6 | 0.6  |
| 36(1) | 13(1) | 1670.6 | 1629.0 | 3.2  |
| 36(1) | 14(1) | 1645.4 | 1616.0 | 0.3  |
| 36(1) | 15(1) | 1576.8 | 1539.0 | 0.2  |
| 36(1) | 16(1) | 1561.2 | 1530.0 | 0.6  |
| 36(1) | 17(1) | 1549.2 | 1520.8 | 4.4  |
| 36(1) | 18(1) | 1511.1 | 1488.5 | 0.3  |
| 36(1) | 19(1) | 1435.9 | 1409.6 | 0.1  |
| 36(1) | 20(1) | 1356.1 | 1339.0 | 0.8  |
| 36(1) | 21(1) | 1343.2 | 1321.1 | 0.3  |
| 36(1) | 22(1) | 1224.7 | 1213.8 | 0.2  |
| 36(1) | 23(1) | 1212.2 | 1194.9 | 10.9 |
| 36(1) | 24(1) | 1147.2 | 1130.9 | 6.9  |
| 36(1) | 25(1) | 1129.0 | 1112.8 | 1.7  |
| 36(1) | 26(1) | 1117.0 | 1098.4 | 0.1  |
| 36(1) | 27(1) | 1071.2 | 1055.7 | 0.0  |
| 36(1) | 28(1) | 1012.4 | 998.3  | 0.0  |
| 36(1) | 29(1) | 964.0  | 953.5  | 0.0  |
| 36(1) | 30(1) | 947.0  | 934.2  | 0.0  |
| 36(1) | 31(1) | 888.5  | 879.2  | 0.0  |
| 36(1) | 32(1) | 860.7  | 816.5  | 0.1  |
| 36(1) | 33(1) | 835.0  | 821.4  | 0.0  |
| 36(1) | 34(1) | 793.1  | 783.8  | 0.1  |
| 36(1) | 35(1) | 747.6  | 739.1  | 0.1  |
| 37(1) | 1(1)  | 4119.7 | 3941.3 | 0.0  |
| 37(1) | 2(1)  | 4106.6 | 3915.1 | 0.0  |
| 37(1) | 3(1)  | 3514.9 | 3391.6 | 0.0  |



|       |       |        |        |      |
|-------|-------|--------|--------|------|
| 37(1) | 4(1)  | 3491.5 | 3363.4 | 0.0  |
| 37(1) | 5(1)  | 3480.1 | 3352.9 | 0.0  |
| 37(1) | 6(1)  | 2144.0 | 2104.9 | 0.1  |
| 37(1) | 7(1)  | 1968.6 | 1919.6 | 0.0  |
| 37(1) | 8(1)  | 1935.1 | 1888.7 | 0.0  |
| 37(1) | 9(1)  | 1851.0 | 1813.0 | 3.2  |
| 37(1) | 10(1) | 1786.7 | 1750.2 | 0.2  |
| 37(1) | 11(1) | 1669.5 | 1638.9 | 54.5 |
| 37(1) | 12(1) | 1660.3 | 1627.6 | 0.6  |
| 37(1) | 13(1) | 1615.8 | 1574.1 | 0.8  |
| 37(1) | 14(1) | 1590.6 | 1560.4 | 0.5  |
| 37(1) | 15(1) | 1522.0 | 1483.4 | 1.4  |
| 37(1) | 16(1) | 1506.4 | 1475.3 | 0.0  |
| 37(1) | 17(1) | 1494.4 | 1465.5 | 0.2  |
| 37(1) | 18(1) | 1456.3 | 1433.1 | 0.5  |
| 37(1) | 19(1) | 1381.1 | 1355.2 | 0.5  |
| 37(1) | 20(1) | 1301.3 | 1279.9 | 4.9  |
| 37(1) | 21(1) | 1288.4 | 1267.0 | 4.7  |
| 37(1) | 22(1) | 1169.9 | 1159.1 | 0.0  |
| 37(1) | 23(1) | 1157.4 | 1140.5 | 0.0  |
| 37(1) | 24(1) | 1092.4 | 1076.4 | 0.2  |
| 37(1) | 25(1) | 1074.2 | 1058.5 | 0.2  |
| 37(1) | 26(1) | 1062.2 | 1043.6 | 0.1  |
| 37(1) | 27(1) | 1016.4 | 1001.4 | 0.1  |
| 37(1) | 28(1) | 957.6  | 943.5  | 0.0  |
| 37(1) | 29(1) | 909.3  | 898.7  | 0.0  |
| 37(1) | 30(1) | 892.2  | 879.3  | 0.0  |
| 37(1) | 31(1) | 833.7  | 824.6  | 0.0  |
| 37(1) | 32(1) | 805.9  | 762.4  | 0.2  |
| 37(1) | 33(1) | 780.2  | 766.4  | 0.0  |
| 37(1) | 34(1) | 738.3  | 728.8  | 0.0  |
| 37(1) | 35(1) | 692.8  | 684.5  | 0.0  |
| 37(1) | 36(1) | 671.1  | 662.8  | 0.0  |
| 38(1) | 1(1)  | 4079.5 | 3900.6 | 0.0  |
| 38(1) | 2(1)  | 4066.4 | 3874.2 | 0.1  |
| 38(1) | 3(1)  | 3474.7 | 3350.7 | 0.0  |
| 38(1) | 4(1)  | 3451.3 | 3322.8 | 0.0  |
| 38(1) | 5(1)  | 3439.9 | 3311.8 | 0.0  |
| 38(1) | 6(1)  | 2103.8 | 2064.2 | 0.1  |
| 38(1) | 7(1)  | 1928.4 | 1880.6 | 0.0  |

|       |       |        |        |      |
|-------|-------|--------|--------|------|
| 38(1) | 8(1)  | 1894.9 | 1848.6 | 0.0  |
| 38(1) | 9(1)  | 1810.8 | 1771.5 | 0.1  |
| 38(1) | 10(1) | 1746.4 | 1709.8 | 0.0  |
| 38(1) | 11(1) | 1629.3 | 1596.2 | 16.0 |
| 38(1) | 12(1) | 1620.1 | 1584.5 | 0.4  |
| 38(1) | 13(1) | 1575.5 | 1533.4 | 0.1  |
| 38(1) | 14(1) | 1550.4 | 1520.5 | 0.0  |
| 38(1) | 15(1) | 1481.8 | 1443.1 | 0.2  |
| 38(1) | 16(1) | 1466.2 | 1434.0 | 0.0  |
| 38(1) | 17(1) | 1454.2 | 1424.9 | 0.0  |
| 38(1) | 18(1) | 1416.1 | 1392.3 | 0.1  |
| 38(1) | 19(1) | 1340.9 | 1314.7 | 0.9  |
| 38(1) | 20(1) | 1261.1 | 1239.5 | 0.4  |
| 38(1) | 21(1) | 1248.1 | 1225.4 | 1.8  |
| 38(1) | 22(1) | 1129.7 | 1118.3 | 0.3  |
| 38(1) | 23(1) | 1117.2 | 1099.2 | 0.0  |
| 38(1) | 24(1) | 1052.1 | 1035.0 | 1.3  |
| 38(1) | 25(1) | 1033.9 | 1018.2 | 0.1  |
| 38(1) | 26(1) | 1022.0 | 1003.4 | 0.1  |
| 38(1) | 27(1) | 976.2  | 960.9  | 0.4  |
| 38(1) | 28(1) | 917.4  | 903.1  | 0.2  |
| 38(1) | 29(1) | 869.0  | 858.0  | 0.3  |
| 38(1) | 30(1) | 852.0  | 838.1  | 0.0  |
| 38(1) | 31(1) | 793.5  | 783.1  | 0.3  |
| 38(1) | 32(1) | 765.7  | 722.0  | 0.2  |
| 38(1) | 33(1) | 740.0  | 725.7  | 0.4  |
| 38(1) | 34(1) | 698.1  | 688.5  | 0.0  |
| 38(1) | 35(1) | 652.6  | 644.8  | 0.3  |
| 38(1) | 36(1) | 630.9  | 621.7  | 0.0  |
| 38(1) | 37(1) | 576.1  | 566.8  | 0.0  |
| 39(1) | 1(1)  | 4040.1 | 3860.8 | 0.0  |
| 39(1) | 2(1)  | 4027.0 | 3834.7 | 0.0  |
| 39(1) | 3(1)  | 3435.3 | 3311.0 | 0.0  |
| 39(1) | 4(1)  | 3411.9 | 3282.7 | 0.0  |
| 39(1) | 5(1)  | 3400.5 | 3272.0 | 0.0  |
| 39(1) | 6(1)  | 2064.4 | 2024.0 | 0.0  |
| 39(1) | 7(1)  | 1889.0 | 1840.7 | 0.0  |
| 39(1) | 8(1)  | 1855.5 | 1809.4 | 0.0  |
| 39(1) | 9(1)  | 1771.4 | 1731.8 | 0.0  |
| 39(1) | 10(1) | 1707.1 | 1669.9 | 0.1  |

|       |       |        |        |     |
|-------|-------|--------|--------|-----|
| 39(1) | 11(1) | 1589.9 | 1555.5 | 0.0 |
| 39(1) | 12(1) | 1580.7 | 1544.7 | 0.1 |
| 39(1) | 13(1) | 1536.2 | 1493.7 | 0.0 |
| 39(1) | 14(1) | 1511.0 | 1480.5 | 0.0 |
| 39(1) | 15(1) | 1442.4 | 1403.4 | 0.0 |
| 39(1) | 16(1) | 1426.8 | 1394.1 | 0.0 |
| 39(1) | 17(1) | 1414.8 | 1384.8 | 0.0 |
| 39(1) | 18(1) | 1376.7 | 1352.6 | 0.0 |
| 39(1) | 19(1) | 1301.5 | 1274.4 | 2.2 |
| 39(1) | 20(1) | 1221.7 | 1199.8 | 0.0 |
| 39(1) | 21(1) | 1208.8 | 1185.4 | 1.5 |
| 39(1) | 22(1) | 1090.3 | 1078.7 | 0.0 |
| 39(1) | 23(1) | 1077.8 | 1059.8 | 2.8 |
| 39(1) | 24(1) | 1012.8 | 995.8  | 0.0 |
| 39(1) | 25(1) | 994.6  | 978.2  | 0.0 |
| 39(1) | 26(1) | 982.6  | 963.6  | 0.0 |
| 39(1) | 27(1) | 936.8  | 920.6  | 0.1 |
| 39(1) | 28(1) | 878.0  | 862.5  | 0.0 |
| 39(1) | 29(1) | 829.7  | 818.3  | 0.0 |
| 39(1) | 30(1) | 812.6  | 799.1  | 0.0 |
| 39(1) | 31(1) | 754.1  | 745.0  | 0.0 |
| 39(1) | 32(1) | 726.3  | 681.3  | 0.0 |
| 39(1) | 33(1) | 700.6  | 685.8  | 0.0 |
| 39(1) | 34(1) | 658.7  | 647.6  | 0.1 |
| 39(1) | 35(1) | 613.2  | 603.6  | 0.3 |
| 39(1) | 36(1) | 591.5  | 582.0  | 0.0 |
| 39(1) | 37(1) | 536.7  | 527.2  | 0.0 |
| 39(1) | 38(1) | 496.5  | 487.1  | 0.1 |
| 40(1) | 1(1)  | 3990.9 | 3813.3 | 0.0 |
| 40(1) | 2(1)  | 3977.8 | 3786.5 | 0.0 |
| 40(1) | 3(1)  | 3386.1 | 3263.3 | 0.0 |
| 40(1) | 4(1)  | 3362.7 | 3235.2 | 0.0 |
| 40(1) | 5(1)  | 3351.3 | 3225.1 | 0.0 |
| 40(1) | 6(1)  | 2015.2 | 1976.4 | 0.2 |
| 40(1) | 7(1)  | 1839.8 | 1793.6 | 0.9 |
| 40(1) | 8(1)  | 1806.3 | 1761.9 | 0.5 |
| 40(1) | 9(1)  | 1722.2 | 1684.3 | 0.0 |
| 40(1) | 10(1) | 1657.8 | 1623.1 | 0.0 |
| 40(1) | 11(1) | 1540.7 | 1507.3 | 3.3 |
| 40(1) | 12(1) | 1531.4 | 1497.1 | 0.0 |

|       |       |        |        |     |
|-------|-------|--------|--------|-----|
| 40(1) | 13(1) | 1486.9 | 1445.1 | 0.6 |
| 40(1) | 14(1) | 1461.8 | 1432.6 | 0.3 |
| 40(1) | 15(1) | 1393.2 | 1355.6 | 0.0 |
| 40(1) | 16(1) | 1377.6 | 1346.9 | 0.3 |
| 40(1) | 17(1) | 1365.6 | 1337.2 | 0.1 |
| 40(1) | 18(1) | 1327.5 | 1304.8 | 0.3 |
| 40(1) | 19(1) | 1252.3 | 1226.7 | 1.2 |
| 40(1) | 20(1) | 1172.5 | 1152.2 | 1.0 |
| 40(1) | 21(1) | 1159.5 | 1138.5 | 0.0 |
| 40(1) | 22(1) | 1041.1 | 1030.5 | 0.0 |
| 40(1) | 23(1) | 1028.6 | 1012.2 | 0.0 |
| 40(1) | 24(1) | 963.5  | 948.0  | 0.1 |
| 40(1) | 25(1) | 945.3  | 929.9  | 0.0 |
| 40(1) | 26(1) | 933.4  | 915.3  | 0.0 |
| 40(1) | 27(1) | 887.6  | 873.5  | 0.0 |
| 40(1) | 28(1) | 828.8  | 815.1  | 0.0 |
| 40(1) | 29(1) | 780.4  | 770.6  | 0.3 |
| 40(1) | 30(1) | 763.4  | 750.8  | 0.3 |
| 40(1) | 31(1) | 704.9  | 695.9  | 0.0 |
| 40(1) | 32(1) | 677.1  | 634.3  | 0.4 |
| 40(1) | 33(1) | 651.4  | 638.5  | 0.0 |
| 40(1) | 34(1) | 609.5  | 600.8  | 0.2 |
| 40(1) | 35(1) | 564.0  | 557.0  | 0.0 |
| 40(1) | 36(1) | 542.3  | 534.7  | 0.0 |
| 40(1) | 37(1) | 487.5  | 479.9  | 0.9 |
| 40(1) | 38(1) | 447.3  | 438.4  | 0.0 |
| 40(1) | 39(1) | 407.9  | 399.0  | 0.0 |
| 41(1) | 1(1)  | 3907.0 | 3727.8 | 0.1 |
| 41(1) | 2(1)  | 3893.9 | 3701.4 | 0.0 |
| 41(1) | 3(1)  | 3302.2 | 3177.8 | 0.0 |
| 41(1) | 4(1)  | 3278.7 | 3149.7 | 0.0 |
| 41(1) | 5(1)  | 3267.3 | 3138.6 | 0.0 |
| 41(1) | 6(1)  | 1931.3 | 1890.3 | 0.2 |
| 41(1) | 7(1)  | 1755.8 | 1707.8 | 0.1 |
| 41(1) | 8(1)  | 1722.3 | 1676.5 | 0.0 |
| 41(1) | 9(1)  | 1638.2 | 1598.7 | 0.3 |
| 41(1) | 10(1) | 1573.9 | 1537.0 | 0.0 |
| 41(1) | 11(1) | 1456.7 | 1422.7 | 0.0 |
| 41(1) | 12(1) | 1447.5 | 1411.8 | 0.0 |
| 41(1) | 13(1) | 1403.0 | 1359.9 | 0.4 |

|       |       |        |        |      |
|-------|-------|--------|--------|------|
| 41(1) | 14(1) | 1377.8 | 1347.1 | 0.0  |
| 41(1) | 15(1) | 1309.3 | 1270.1 | 54.5 |
| 41(1) | 16(1) | 1293.7 | 1260.8 | 0.6  |
| 41(1) | 17(1) | 1281.6 | 1251.7 | 0.1  |
| 41(1) | 18(1) | 1243.5 | 1219.5 | 0.0  |
| 41(1) | 19(1) | 1168.4 | 1141.4 | 0.1  |
| 41(1) | 20(1) | 1088.5 | 1066.6 | 0.0  |
| 41(1) | 21(1) | 1075.6 | 1051.9 | 0.0  |
| 41(1) | 22(1) | 957.1  | 944.9  | 0.1  |
| 41(1) | 23(1) | 944.6  | 926.3  | 0.2  |
| 41(1) | 24(1) | 879.6  | 862.2  | 0.1  |
| 41(1) | 25(1) | 861.4  | 845.0  | 0.0  |
| 41(1) | 26(1) | 849.4  | 830.1  | 0.0  |
| 41(1) | 27(1) | 803.6  | 787.0  | 0.0  |
| 41(1) | 28(1) | 744.9  | 729.3  | 0.0  |
| 41(1) | 29(1) | 696.5  | 684.7  | 0.0  |
| 41(1) | 30(1) | 679.4  | 665.9  | 0.0  |
| 41(1) | 31(1) | 621.0  | 610.2  | 0.0  |
| 41(1) | 32(1) | 593.1  | 548.2  | 0.1  |
| 41(1) | 33(1) | 567.4  | 552.2  | 0.1  |
| 41(1) | 34(1) | 525.6  | 514.6  | 0.0  |
| 41(1) | 35(1) | 480.1  | 471.5  | 0.3  |
| 41(1) | 36(1) | 458.3  | 448.8  | 0.0  |
| 41(1) | 37(1) | 403.5  | 394.5  | 0.0  |
| 41(1) | 38(1) | 363.3  | 352.7  | 0.0  |
| 41(1) | 39(1) | 323.9  | 313.7  | 0.0  |
| 41(1) | 40(1) | 274.7  | 264.6  | 0.0  |
| 42(1) | 1(1)  | 3873.8 | 3689.0 | 0.0  |
| 42(1) | 2(1)  | 3860.7 | 3663.4 | 0.1  |
| 42(1) | 3(1)  | 3269.0 | 3139.6 | 0.0  |
| 42(1) | 4(1)  | 3245.5 | 3111.5 | 0.0  |
| 42(1) | 5(1)  | 3234.1 | 3100.2 | 0.0  |
| 42(1) | 6(1)  | 1898.1 | 1851.6 | 1.3  |
| 42(1) | 7(1)  | 1722.6 | 1669.6 | 0.1  |
| 42(1) | 8(1)  | 1689.1 | 1638.6 | 0.1  |
| 42(1) | 9(1)  | 1605.0 | 1560.4 | 0.1  |
| 42(1) | 10(1) | 1540.7 | 1498.8 | 0.0  |
| 42(1) | 11(1) | 1423.6 | 1384.9 | 0.0  |
| 42(1) | 12(1) | 1414.3 | 1373.7 | 0.1  |
| 42(1) | 13(1) | 1369.8 | 1321.3 | 0.9  |

|       |       |        |        |     |
|-------|-------|--------|--------|-----|
| 42(1) | 14(1) | 1344.6 | 1308.3 | 0.3 |
| 42(1) | 15(1) | 1276.1 | 1231.2 | 0.1 |
| 42(1) | 16(1) | 1260.5 | 1222.3 | 0.1 |
| 42(1) | 17(1) | 1248.4 | 1213.2 | 0.1 |
| 42(1) | 18(1) | 1210.3 | 1181.3 | 2.6 |
| 42(1) | 19(1) | 1135.2 | 1103.1 | 0.3 |
| 42(1) | 20(1) | 1055.3 | 1028.8 | 0.0 |
| 42(1) | 21(1) | 1042.4 | 1012.0 | 0.0 |
| 42(1) | 22(1) | 923.9  | 905.5  | 0.0 |
| 42(1) | 23(1) | 911.4  | 888.6  | 0.0 |
| 42(1) | 24(1) | 846.4  | 822.9  | 1.3 |
| 42(1) | 25(1) | 828.2  | 806.4  | 0.0 |
| 42(1) | 26(1) | 816.2  | 791.5  | 0.0 |
| 42(1) | 27(1) | 770.4  | 748.1  | 0.1 |
| 42(1) | 28(1) | 711.7  | 689.5  | 0.0 |
| 42(1) | 29(1) | 663.3  | 647.0  | 0.0 |
| 42(1) | 30(1) | 646.2  | 626.7  | 0.3 |
| 42(1) | 31(1) | 587.8  | 571.8  | 0.0 |
| 42(1) | 32(1) | 559.9  | 510.0  | 1.7 |
| 42(1) | 33(1) | 534.2  | 512.4  | 0.4 |
| 42(1) | 34(1) | 492.4  | 477.3  | 0.4 |
| 42(1) | 35(1) | 446.9  | 429.3  | 0.1 |
| 42(1) | 36(1) | 425.1  | 409.9  | 0.4 |
| 42(1) | 37(1) | 370.4  | 354.9  | 0.1 |
| 42(1) | 38(1) | 330.1  | 314.7  | 0.0 |
| 42(1) | 39(1) | 290.7  | 274.0  | 0.0 |
| 42(1) | 40(1) | 241.5  | 227.3  | 0.0 |
| 42(1) | 41(1) | 157.6  | 141.3  | 0.0 |

**Table S17.** Harmonic and anharmonic vibrational frequencies and their intensities of conformer **C2\*** as computed at the B3LYP/cc-pVTZ level of theory.

| Mode (quanta) | $\nu_{\text{harm}}$<br>( $\text{cm}^{-1}$ ) | $\nu_{\text{anharm}}$<br>( $\text{cm}^{-1}$ ) | $I_{\text{harm}}$<br>( $\text{km mol}^{-1}$ ) | $I_{\text{anharm}}$<br>( $\text{km mol}^{-1}$ ) |
|---------------|---------------------------------------------|-----------------------------------------------|-----------------------------------------------|-------------------------------------------------|
| 1(1)          | 3811.6                                      | 3638.0                                        | 86.4                                          | 73.9                                            |
| 2(1)          | 3798.5                                      | 3610.9                                        | 33.3                                          | 26.3                                            |
| 3(1)          | 3206.8                                      | 3086.6                                        | 1.4                                           | 2.3                                             |
| 4(1)          | 3183.4                                      | 3056.8                                        | 1.6                                           | 2.3                                             |
| 5(1)          | 3172.0                                      | 3036.5                                        | 3.7                                           | 5.2                                             |
| 6(1)          | 1835.9                                      | 1800.8                                        | 357.4                                         | 88.0                                            |
| 7(1)          | 1660.4                                      | 1615.1                                        | 250.2                                         | 126.0                                           |
| 8(1)          | 1626.9                                      | 1585.2                                        | 50.8                                          | 15.5                                            |
| 9(1)          | 1542.8                                      | 1508.7                                        | 56.8                                          | 30.0                                            |
| 10(1)         | 1478.5                                      | 1446.6                                        | 43.1                                          | 12.3                                            |
| 11(1)         | 1361.4                                      | 1328.1                                        | 46.2                                          | 26.5                                            |
| 12(1)         | 1352.1                                      | 1320.5                                        | 51.3                                          | 58.8                                            |
| 13(1)         | 1307.6                                      | 1273.8                                        | 385.1                                         | 187.2                                           |
| 14(1)         | 1282.4                                      | 1256.6                                        | 86.3                                          | 72.9                                            |
| 15(1)         | 1213.9                                      | 1181.9                                        | 159.4                                         | 156.9                                           |
| 16(1)         | 1198.3                                      | 1171.8                                        | 48.5                                          | 45.7                                            |
| 17(1)         | 1186.3                                      | 1161.0                                        | 146.7                                         | 73.2                                            |
| 18(1)         | 1148.1                                      | 1129.3                                        | 57.7                                          | 59.4                                            |
| 19(1)         | 1073.0                                      | 1051.1                                        | 64.3                                          | 63.9                                            |
| 20(1)         | 993.2                                       | 975.9                                         | 17.1                                          | 18.9                                            |
| 21(1)         | 980.2                                       | 963.4                                         | 2.2                                           | 1.0                                             |
| 22(1)         | 861.7                                       | 855.8                                         | 49.1                                          | 46.0                                            |
| 23(1)         | 849.2                                       | 836.2                                         | 3.7                                           | 2.0                                             |
| 24(1)         | 784.2                                       | 772.0                                         | 8.5                                           | 6.5                                             |
| 25(1)         | 766.0                                       | 753.4                                         | 4.5                                           | 4.5                                             |
| 26(1)         | 754.1                                       | 740.0                                         | 9.7                                           | 13.5                                            |
| 27(1)         | 708.3                                       | 698.7                                         | 11.1                                          | 11.0                                            |
| 28(1)         | 649.5                                       | 640.3                                         | 5.2                                           | 4.9                                             |
| 29(1)         | 601.1                                       | 594.6                                         | 15.7                                          | 14.9                                            |
| 30(1)         | 584.1                                       | 575.6                                         | 3.6                                           | 6.1                                             |
| 31(1)         | 525.6                                       | 520.2                                         | 8.0                                           | 6.7                                             |
| 32(1)         | 497.7                                       | 452.5                                         | 90.0                                          | 74.6                                            |
| 33(1)         | 472.0                                       | 463.1                                         | 5.6                                           | 6.9                                             |
| 34(1)         | 430.2                                       | 424.2                                         | 7.6                                           | 13.0                                            |
| 35(1)         | 384.7                                       | 386.9                                         | 100.3                                         | 95.0                                            |
| 36(1)         | 362.9                                       | 359.8                                         | 3.8                                           | 3.5                                             |
| 37(1)         | 308.2                                       | 304.2                                         | 4.5                                           | 4.2                                             |

|       |        |        |     |      |
|-------|--------|--------|-----|------|
| 38(1) | 267.9  | 264.1  | 7.5 | 6.2  |
| 39(1) | 228.6  | 224.6  | 1.3 | 1.1  |
| 40(1) | 179.3  | 175.8  | 4.9 | 4.7  |
| 41(1) | 95.4   | 87.6   | 0.8 | 0.8  |
| 42(1) | 62.2   | 51.4   | 4.9 | 4.6  |
| 1(2)  | 7623.1 | 7111.3 |     | 6.1  |
| 2(2)  | 7596.9 | 7053.9 |     | 3.1  |
| 3(2)  | 6413.5 | 6073.7 |     | 0.7  |
| 4(2)  | 6366.7 | 6008.1 |     | 0.6  |
| 5(2)  | 6343.9 | 5994.2 |     | 0.7  |
| 6(2)  | 3671.8 | 3582.7 |     | 5.1  |
| 7(2)  | 3320.9 | 3232.4 |     | 0.5  |
| 8(2)  | 3253.8 | 3167.1 |     | 0.8  |
| 9(2)  | 3085.6 | 3008.7 |     | 0.0  |
| 10(2) | 2957.0 | 2888.7 |     | 0.1  |
| 11(2) | 2722.7 | 2661.2 |     | 1.7  |
| 12(2) | 2704.2 | 2638.8 |     | 0.1  |
| 13(2) | 2615.2 | 2530.9 |     | 0.1  |
| 14(2) | 2564.9 | 2511.9 |     | 0.1  |
| 15(2) | 2427.8 | 2357.1 |     | 0.2  |
| 16(2) | 2396.6 | 2340.5 |     | 0.4  |
| 17(2) | 2372.5 | 2317.2 |     | 0.9  |
| 18(2) | 2296.3 | 2258.1 |     | 0.2  |
| 19(2) | 2146.0 | 2097.7 |     | 1.4  |
| 20(2) | 1986.3 | 1950.7 |     | 0.3  |
| 21(2) | 1960.4 | 1925.8 |     | 2.9  |
| 22(2) | 1723.5 | 1714.7 |     | 0.8  |
| 23(2) | 1698.5 | 1671.6 |     | 1.6  |
| 24(2) | 1568.4 | 1543.4 |     | 0.4  |
| 25(2) | 1532.0 | 1508.0 |     | 3.3  |
| 26(2) | 1508.1 | 1479.6 |     | 0.1  |
| 27(2) | 1416.5 | 1395.0 |     | 0.1  |
| 28(2) | 1299.0 | 1280.6 |     | 7.9  |
| 29(2) | 1202.2 | 1189.9 |     | 11.0 |
| 30(2) | 1168.1 | 1150.4 |     | 0.1  |
| 31(2) | 1051.2 | 1040.3 |     | 0.1  |
| 32(2) | 995.4  | 871.1  |     | 3.2  |
| 33(2) | 944.0  | 926.4  |     | 0.1  |
| 34(2) | 860.4  | 847.4  |     | 1.2  |
| 35(2) | 769.3  | 765.9  |     | 4.5  |



|       |      |        |        |     |
|-------|------|--------|--------|-----|
| 36(2) |      | 725.9  | 717.9  | 0.1 |
| 37(2) |      | 616.3  | 608.2  | 0.1 |
| 38(2) |      | 535.9  | 527.7  | 0.3 |
| 39(2) |      | 457.1  | 448.9  | 0.2 |
| 40(2) |      | 358.7  | 351.6  | 0.0 |
| 41(2) |      | 190.8  | 175.2  | 0.0 |
| 42(2) |      | 124.4  | 100.5  | 0.0 |
| 2(1)  | 1(1) | 7610.0 | 7248.7 | 0.0 |
| 3(1)  | 1(1) | 7018.3 | 6725.2 | 0.0 |
| 3(1)  | 2(1) | 7005.2 | 6698.1 | 0.0 |
| 4(1)  | 1(1) | 6994.9 | 6696.2 | 0.0 |
| 4(1)  | 2(1) | 6981.8 | 6670.1 | 0.0 |
| 4(1)  | 3(1) | 6390.1 | 6146.1 | 0.0 |
| 5(1)  | 1(1) | 6983.5 | 6686.4 | 0.0 |
| 5(1)  | 2(1) | 6970.4 | 6658.9 | 0.0 |
| 5(1)  | 3(1) | 6378.7 | 6118.3 | 0.1 |
| 5(1)  | 4(1) | 6355.3 | 6106.4 | 0.0 |
| 6(1)  | 1(1) | 5647.5 | 5438.9 | 0.0 |
| 6(1)  | 2(1) | 5634.4 | 5408.7 | 0.1 |
| 6(1)  | 3(1) | 5042.7 | 4888.3 | 0.0 |
| 6(1)  | 4(1) | 5019.2 | 4860.1 | 0.0 |
| 6(1)  | 5(1) | 5007.8 | 4849.4 | 0.0 |
| 7(1)  | 1(1) | 5472.0 | 5254.7 | 0.0 |
| 7(1)  | 2(1) | 5458.9 | 5228.6 | 0.0 |
| 7(1)  | 3(1) | 4867.2 | 4710.0 | 0.1 |
| 7(1)  | 4(1) | 4843.8 | 4678.2 | 0.1 |
| 7(1)  | 5(1) | 4832.4 | 4667.0 | 0.1 |
| 7(1)  | 6(1) | 3496.3 | 3418.5 | 0.1 |
| 8(1)  | 1(1) | 5438.5 | 5222.3 | 0.6 |
| 8(1)  | 2(1) | 5425.4 | 5196.7 | 0.0 |
| 8(1)  | 3(1) | 4833.7 | 4673.6 | 0.1 |
| 8(1)  | 4(1) | 4810.3 | 4643.4 | 0.2 |
| 8(1)  | 5(1) | 4798.9 | 4632.9 | 0.1 |
| 8(1)  | 6(1) | 3462.8 | 3386.4 | 0.0 |
| 8(1)  | 7(1) | 3287.4 | 3203.3 | 0.2 |
| 9(1)  | 1(1) | 5354.4 | 5145.3 | 0.1 |
| 9(1)  | 2(1) | 5341.3 | 5119.3 | 0.0 |
| 9(1)  | 3(1) | 4749.6 | 4597.0 | 0.0 |
| 9(1)  | 4(1) | 4726.2 | 4569.6 | 0.0 |
| 9(1)  | 5(1) | 4714.8 | 4561.9 | 0.0 |

|       |       |        |        |     |
|-------|-------|--------|--------|-----|
| 9(1)  | 6(1)  | 3378.7 | 3309.3 | 0.0 |
| 9(1)  | 7(1)  | 3203.3 | 3131.3 | 0.1 |
| 9(1)  | 8(1)  | 3169.7 | 3093.7 | 0.1 |
| 10(1) | 1(1)  | 5290.1 | 5084.1 | 0.5 |
| 10(1) | 2(1)  | 5277.0 | 5057.4 | 0.0 |
| 10(1) | 3(1)  | 4685.3 | 4540.2 | 0.1 |
| 10(1) | 4(1)  | 4661.9 | 4508.8 | 0.1 |
| 10(1) | 5(1)  | 4650.5 | 4495.0 | 0.0 |
| 10(1) | 6(1)  | 3314.4 | 3247.2 | 0.0 |
| 10(1) | 7(1)  | 3138.9 | 3048.6 | 0.1 |
| 10(1) | 8(1)  | 3105.4 | 3027.8 | 0.1 |
| 10(1) | 9(1)  | 3021.3 | 2952.2 | 0.0 |
| 11(1) | 1(1)  | 5172.9 | 4965.9 | 0.5 |
| 11(1) | 2(1)  | 5159.8 | 4942.5 | 0.0 |
| 11(1) | 3(1)  | 4568.1 | 4419.2 | 0.0 |
| 11(1) | 4(1)  | 4544.7 | 4392.6 | 0.1 |
| 11(1) | 5(1)  | 4533.3 | 4384.5 | 0.0 |
| 11(1) | 6(1)  | 3197.2 | 3132.7 | 0.0 |
| 11(1) | 7(1)  | 3021.8 | 2938.3 | 0.7 |
| 11(1) | 8(1)  | 2988.3 | 2909.0 | 0.2 |
| 11(1) | 9(1)  | 2904.2 | 2834.1 | 0.8 |
| 11(1) | 10(1) | 2839.9 | 2774.6 | 0.9 |
| 12(1) | 1(1)  | 5163.7 | 4957.9 | 0.1 |
| 12(1) | 2(1)  | 5150.6 | 4932.5 | 0.0 |
| 12(1) | 3(1)  | 4558.9 | 4410.6 | 0.2 |
| 12(1) | 4(1)  | 4535.5 | 4381.6 | 0.3 |
| 12(1) | 5(1)  | 4524.1 | 4368.6 | 0.0 |
| 12(1) | 6(1)  | 3188.0 | 3122.9 | 0.0 |
| 12(1) | 7(1)  | 3012.6 | 2933.5 | 0.1 |
| 12(1) | 8(1)  | 2979.0 | 2904.4 | 0.0 |
| 12(1) | 9(1)  | 2894.9 | 2826.1 | 0.4 |
| 12(1) | 10(1) | 2830.6 | 2763.5 | 0.1 |
| 12(1) | 11(1) | 2713.5 | 2651.7 | 0.5 |
| 13(1) | 1(1)  | 5119.2 | 4908.3 | 0.0 |
| 13(1) | 2(1)  | 5106.1 | 4879.3 | 0.9 |
| 13(1) | 3(1)  | 4514.4 | 4357.5 | 0.1 |
| 13(1) | 4(1)  | 4491.0 | 4328.7 | 0.0 |
| 13(1) | 5(1)  | 4479.6 | 4319.8 | 0.0 |
| 13(1) | 6(1)  | 3143.5 | 3070.0 | 0.1 |
| 13(1) | 7(1)  | 2968.0 | 2886.9 | 0.1 |

|       |       |        |        |     |
|-------|-------|--------|--------|-----|
| 13(1) | 8(1)  | 2934.5 | 2856.1 | 0.0 |
| 13(1) | 9(1)  | 2850.4 | 2777.9 | 0.3 |
| 13(1) | 10(1) | 2786.1 | 2716.5 | 0.0 |
| 13(1) | 11(1) | 2669.0 | 2601.0 | 0.1 |
| 13(1) | 12(1) | 2659.7 | 2592.1 | 0.1 |
| 14(1) | 1(1)  | 5094.0 | 4895.8 | 0.1 |
| 14(1) | 2(1)  | 5080.9 | 4868.3 | 0.0 |
| 14(1) | 3(1)  | 4489.2 | 4344.3 | 0.0 |
| 14(1) | 4(1)  | 4465.8 | 4314.9 | 0.0 |
| 14(1) | 5(1)  | 4454.4 | 4300.9 | 0.1 |
| 14(1) | 6(1)  | 3118.3 | 3058.2 | 0.0 |
| 14(1) | 7(1)  | 2942.9 | 2872.1 | 0.2 |
| 14(1) | 8(1)  | 2909.4 | 2840.1 | 0.0 |
| 14(1) | 9(1)  | 2825.3 | 2762.7 | 0.1 |
| 14(1) | 10(1) | 2761.0 | 2702.4 | 0.1 |
| 14(1) | 11(1) | 2643.8 | 2586.7 | 0.3 |
| 14(1) | 12(1) | 2634.6 | 2578.1 | 0.4 |
| 14(1) | 13(1) | 2590.1 | 2527.7 | 0.1 |
| 15(1) | 1(1)  | 5025.4 | 4817.4 | 0.6 |
| 15(1) | 2(1)  | 5012.4 | 4785.2 | 0.5 |
| 15(1) | 3(1)  | 4420.6 | 4267.2 | 0.0 |
| 15(1) | 4(1)  | 4397.2 | 4237.1 | 0.0 |
| 15(1) | 5(1)  | 4385.8 | 4228.1 | 0.0 |
| 15(1) | 6(1)  | 3049.8 | 2979.4 | 0.0 |
| 15(1) | 7(1)  | 2874.3 | 2795.3 | 0.0 |
| 15(1) | 8(1)  | 2840.8 | 2763.5 | 0.0 |
| 15(1) | 9(1)  | 2756.7 | 2687.1 | 0.7 |
| 15(1) | 10(1) | 2692.4 | 2624.2 | 0.4 |
| 15(1) | 11(1) | 2575.2 | 2509.0 | 0.0 |
| 15(1) | 12(1) | 2566.0 | 2499.8 | 2.0 |
| 15(1) | 13(1) | 2521.5 | 2443.1 | 0.8 |
| 15(1) | 14(1) | 2496.3 | 2436.7 | 0.3 |
| 16(1) | 1(1)  | 5009.8 | 4809.0 | 0.0 |
| 16(1) | 2(1)  | 4996.7 | 4778.1 | 0.3 |
| 16(1) | 3(1)  | 4405.0 | 4255.4 | 0.0 |
| 16(1) | 4(1)  | 4381.6 | 4229.1 | 0.1 |
| 16(1) | 5(1)  | 4370.2 | 4218.8 | 0.0 |
| 16(1) | 6(1)  | 3034.2 | 2970.9 | 0.0 |
| 16(1) | 7(1)  | 2858.7 | 2786.1 | 0.2 |
| 16(1) | 8(1)  | 2825.2 | 2755.7 | 0.0 |

|       |       |        |        |     |
|-------|-------|--------|--------|-----|
| 16(1) | 9(1)  | 2741.1 | 2676.8 | 0.2 |
| 16(1) | 10(1) | 2676.8 | 2615.1 | 0.2 |
| 16(1) | 11(1) | 2559.6 | 2501.5 | 0.0 |
| 16(1) | 12(1) | 2550.4 | 2489.3 | 1.0 |
| 16(1) | 13(1) | 2505.9 | 2436.8 | 0.3 |
| 16(1) | 14(1) | 2480.7 | 2427.7 | 0.5 |
| 16(1) | 15(1) | 2412.2 | 2347.7 | 0.1 |
| 17(1) | 1(1)  | 4997.8 | 4793.3 | 0.6 |
| 17(1) | 2(1)  | 4984.7 | 4770.4 | 0.1 |
| 17(1) | 3(1)  | 4393.0 | 4247.6 | 0.0 |
| 17(1) | 4(1)  | 4369.6 | 4216.7 | 0.0 |
| 17(1) | 5(1)  | 4358.2 | 4209.7 | 0.0 |
| 17(1) | 6(1)  | 3022.1 | 2961.3 | 0.0 |
| 17(1) | 7(1)  | 2846.7 | 2777.4 | 0.1 |
| 17(1) | 8(1)  | 2813.2 | 2742.2 | 0.3 |
| 17(1) | 9(1)  | 2729.1 | 2667.9 | 0.1 |
| 17(1) | 10(1) | 2664.8 | 2604.0 | 0.2 |
| 17(1) | 11(1) | 2547.6 | 2488.5 | 0.2 |
| 17(1) | 12(1) | 2538.4 | 2482.0 | 1.6 |
| 17(1) | 13(1) | 2493.9 | 2429.1 | 0.4 |
| 17(1) | 14(1) | 2468.7 | 2418.1 | 0.1 |
| 17(1) | 15(1) | 2400.1 | 2335.5 | 0.9 |
| 17(1) | 16(1) | 2384.5 | 2331.1 | 0.9 |
| 18(1) | 1(1)  | 4959.7 | 4767.3 | 0.0 |
| 18(1) | 2(1)  | 4946.6 | 4738.6 | 0.1 |
| 18(1) | 3(1)  | 4354.9 | 4209.1 | 0.0 |
| 18(1) | 4(1)  | 4331.5 | 4187.2 | 0.1 |
| 18(1) | 5(1)  | 4320.1 | 4176.6 | 0.0 |
| 18(1) | 6(1)  | 2984.0 | 2929.5 | 0.0 |
| 18(1) | 7(1)  | 2808.6 | 2743.5 | 0.4 |
| 18(1) | 8(1)  | 2775.1 | 2712.8 | 0.0 |
| 18(1) | 9(1)  | 2691.0 | 2635.7 | 0.1 |
| 18(1) | 10(1) | 2626.7 | 2573.0 | 0.5 |
| 18(1) | 11(1) | 2509.5 | 2459.6 | 0.1 |
| 18(1) | 12(1) | 2500.3 | 2448.0 | 0.2 |
| 18(1) | 13(1) | 2455.8 | 2398.2 | 0.5 |
| 18(1) | 14(1) | 2430.6 | 2386.7 | 0.5 |
| 18(1) | 15(1) | 2362.0 | 2308.4 | 0.0 |
| 18(1) | 16(1) | 2346.4 | 2299.4 | 0.0 |
| 18(1) | 17(1) | 2334.4 | 2290.0 | 0.4 |

|       |       |        |        |     |
|-------|-------|--------|--------|-----|
| 19(1) | 1(1)  | 4884.6 | 4689.0 | 0.0 |
| 19(1) | 2(1)  | 4871.5 | 4660.0 | 0.2 |
| 19(1) | 3(1)  | 4279.8 | 4137.9 | 0.0 |
| 19(1) | 4(1)  | 4256.3 | 4109.6 | 0.2 |
| 19(1) | 5(1)  | 4244.9 | 4099.7 | 0.2 |
| 19(1) | 6(1)  | 2908.9 | 2849.3 | 0.2 |
| 19(1) | 7(1)  | 2733.4 | 2666.6 | 0.0 |
| 19(1) | 8(1)  | 2699.9 | 2635.8 | 0.0 |
| 19(1) | 9(1)  | 2615.8 | 2558.5 | 0.0 |
| 19(1) | 10(1) | 2551.5 | 2497.2 | 0.2 |
| 19(1) | 11(1) | 2434.3 | 2380.9 | 0.2 |
| 19(1) | 12(1) | 2425.1 | 2372.5 | 0.0 |
| 19(1) | 13(1) | 2380.6 | 2315.6 | 2.2 |
| 19(1) | 14(1) | 2355.4 | 2308.3 | 0.1 |
| 19(1) | 15(1) | 2286.9 | 2229.7 | 0.3 |
| 19(1) | 16(1) | 2271.3 | 2221.1 | 0.0 |
| 19(1) | 17(1) | 2259.2 | 2211.5 | 0.0 |
| 19(1) | 18(1) | 2221.1 | 2178.7 | 0.5 |
| 20(1) | 1(1)  | 4804.7 | 4613.3 | 0.0 |
| 20(1) | 2(1)  | 4791.6 | 4586.6 | 0.0 |
| 20(1) | 3(1)  | 4199.9 | 4061.7 | 0.2 |
| 20(1) | 4(1)  | 4176.5 | 4032.8 | 0.2 |
| 20(1) | 5(1)  | 4165.1 | 4023.2 | 0.1 |
| 20(1) | 6(1)  | 2829.0 | 2776.9 | 0.0 |
| 20(1) | 7(1)  | 2653.6 | 2591.3 | 0.0 |
| 20(1) | 8(1)  | 2620.1 | 2557.9 | 0.0 |
| 20(1) | 9(1)  | 2536.0 | 2482.5 | 0.2 |
| 20(1) | 10(1) | 2471.7 | 2421.0 | 0.6 |
| 20(1) | 11(1) | 2354.5 | 2306.6 | 0.0 |
| 20(1) | 12(1) | 2345.3 | 2295.8 | 0.5 |
| 20(1) | 13(1) | 2300.8 | 2246.4 | 0.0 |
| 20(1) | 14(1) | 2275.6 | 2233.1 | 0.2 |
| 20(1) | 15(1) | 2207.0 | 2155.4 | 0.4 |
| 20(1) | 16(1) | 2191.4 | 2146.2 | 0.1 |
| 20(1) | 17(1) | 2179.4 | 2136.0 | 0.3 |
| 20(1) | 18(1) | 2141.3 | 2104.9 | 0.4 |
| 20(1) | 19(1) | 2066.1 | 2026.7 | 0.2 |
| 21(1) | 1(1)  | 4791.8 | 4601.2 | 0.0 |
| 21(1) | 2(1)  | 4778.7 | 4574.4 | 0.0 |
| 21(1) | 3(1)  | 4187.0 | 4044.3 | 0.0 |

|       |       |        |        |     |
|-------|-------|--------|--------|-----|
| 21(1) | 4(1)  | 4163.6 | 4022.1 | 0.0 |
| 21(1) | 5(1)  | 4152.2 | 4000.7 | 0.0 |
| 21(1) | 6(1)  | 2816.1 | 2763.9 | 0.0 |
| 21(1) | 7(1)  | 2640.6 | 2579.1 | 0.0 |
| 21(1) | 8(1)  | 2607.1 | 2547.8 | 0.0 |
| 21(1) | 9(1)  | 2523.0 | 2471.2 | 0.0 |
| 21(1) | 10(1) | 2458.7 | 2410.5 | 0.0 |
| 21(1) | 11(1) | 2341.6 | 2294.6 | 0.0 |
| 21(1) | 12(1) | 2332.3 | 2284.5 | 0.0 |
| 21(1) | 13(1) | 2287.8 | 2234.1 | 0.0 |
| 21(1) | 14(1) | 2262.6 | 2221.2 | 0.0 |
| 21(1) | 15(1) | 2194.1 | 2143.7 | 0.0 |
| 21(1) | 16(1) | 2178.5 | 2133.8 | 0.0 |
| 21(1) | 17(1) | 2166.5 | 2124.1 | 0.0 |
| 21(1) | 18(1) | 2128.3 | 2092.2 | 0.0 |
| 21(1) | 19(1) | 2053.2 | 2014.5 | 0.1 |
| 21(1) | 20(1) | 1973.4 | 1939.2 | 0.3 |
| 22(1) | 1(1)  | 4673.3 | 4492.9 | 0.0 |
| 22(1) | 2(1)  | 4660.2 | 4466.7 | 0.0 |
| 22(1) | 3(1)  | 4068.5 | 3941.8 | 0.0 |
| 22(1) | 4(1)  | 4045.1 | 3902.9 | 0.0 |
| 22(1) | 5(1)  | 4033.7 | 3903.9 | 0.0 |
| 22(1) | 6(1)  | 2697.6 | 2656.7 | 0.0 |
| 22(1) | 7(1)  | 2522.2 | 2471.3 | 0.0 |
| 22(1) | 8(1)  | 2488.7 | 2439.2 | 0.0 |
| 22(1) | 9(1)  | 2404.6 | 2365.5 | 0.0 |
| 22(1) | 10(1) | 2340.2 | 2300.9 | 0.0 |
| 22(1) | 11(1) | 2223.1 | 2187.3 | 0.0 |
| 22(1) | 12(1) | 2213.9 | 2177.0 | 0.0 |
| 22(1) | 13(1) | 2169.3 | 2126.3 | 0.0 |
| 22(1) | 14(1) | 2144.2 | 2113.9 | 0.0 |
| 22(1) | 15(1) | 2075.6 | 2033.2 | 0.0 |
| 22(1) | 16(1) | 2060.0 | 2027.1 | 0.0 |
| 22(1) | 17(1) | 2048.0 | 2015.0 | 0.0 |
| 22(1) | 18(1) | 2009.9 | 1985.2 | 0.0 |
| 22(1) | 19(1) | 1934.7 | 1906.3 | 0.0 |
| 22(1) | 20(1) | 1854.9 | 1831.2 | 0.0 |
| 22(1) | 21(1) | 1841.9 | 1821.0 | 0.2 |
| 23(1) | 1(1)  | 4660.8 | 4473.8 | 0.0 |
| 23(1) | 2(1)  | 4647.7 | 4447.0 | 0.0 |

|       |       |        |        |     |
|-------|-------|--------|--------|-----|
| 23(1) | 3(1)  | 4056.0 | 3916.3 | 0.0 |
| 23(1) | 4(1)  | 4032.6 | 3894.2 | 0.0 |
| 23(1) | 5(1)  | 4021.2 | 3881.5 | 0.0 |
| 23(1) | 6(1)  | 2685.1 | 2636.5 | 0.0 |
| 23(1) | 7(1)  | 2509.7 | 2452.0 | 0.0 |
| 23(1) | 8(1)  | 2476.2 | 2420.5 | 0.0 |
| 23(1) | 9(1)  | 2392.1 | 2343.5 | 0.0 |
| 23(1) | 10(1) | 2327.7 | 2281.6 | 0.0 |
| 23(1) | 11(1) | 2210.6 | 2167.7 | 0.0 |
| 23(1) | 12(1) | 2201.3 | 2158.9 | 0.0 |
| 23(1) | 13(1) | 2156.8 | 2105.3 | 0.0 |
| 23(1) | 14(1) | 2131.7 | 2093.3 | 0.0 |
| 23(1) | 15(1) | 2063.1 | 2015.7 | 0.0 |
| 23(1) | 16(1) | 2047.5 | 2007.2 | 0.0 |
| 23(1) | 17(1) | 2035.5 | 1996.5 | 0.0 |
| 23(1) | 18(1) | 1997.4 | 1966.5 | 0.0 |
| 23(1) | 19(1) | 1922.2 | 1886.7 | 0.1 |
| 23(1) | 20(1) | 1842.4 | 1811.6 | 0.0 |
| 23(1) | 21(1) | 1829.4 | 1796.7 | 0.9 |
| 23(1) | 22(1) | 1711.0 | 1692.6 | 1.3 |
| 24(1) | 1(1)  | 4595.8 | 4409.7 | 0.0 |
| 24(1) | 2(1)  | 4582.7 | 4382.8 | 0.0 |
| 24(1) | 3(1)  | 3991.0 | 3858.1 | 0.0 |
| 24(1) | 4(1)  | 3967.6 | 3829.7 | 0.0 |
| 24(1) | 5(1)  | 3956.2 | 3819.2 | 0.0 |
| 24(1) | 6(1)  | 2620.1 | 2570.6 | 0.1 |
| 24(1) | 7(1)  | 2444.6 | 2389.0 | 0.1 |
| 24(1) | 8(1)  | 2411.1 | 2356.8 | 0.0 |
| 24(1) | 9(1)  | 2327.0 | 2279.9 | 0.0 |
| 24(1) | 10(1) | 2262.7 | 2218.2 | 0.0 |
| 24(1) | 11(1) | 2145.6 | 2103.1 | 0.0 |
| 24(1) | 12(1) | 2136.3 | 2093.5 | 0.0 |
| 24(1) | 13(1) | 2091.8 | 2040.8 | 0.1 |
| 24(1) | 14(1) | 2066.6 | 2029.9 | 0.0 |
| 24(1) | 15(1) | 1998.1 | 1950.0 | 0.0 |
| 24(1) | 16(1) | 1982.5 | 1941.4 | 0.1 |
| 24(1) | 17(1) | 1970.5 | 1932.7 | 0.1 |
| 24(1) | 18(1) | 1932.3 | 1901.2 | 0.0 |
| 24(1) | 19(1) | 1857.2 | 1821.6 | 0.1 |
| 24(1) | 20(1) | 1777.4 | 1747.7 | 0.1 |

|       |       |        |        |       |
|-------|-------|--------|--------|-------|
| 24(1) | 21(1) | 1764.4 | 1734.6 | 0.6   |
| 24(1) | 22(1) | 1645.9 | 1627.7 | 0.9   |
| 24(1) | 23(1) | 1633.4 | 1608.4 | 1.0   |
| 25(1) | 1(1)  | 4577.6 | 4392.6 | 0.0   |
| 25(1) | 2(1)  | 4564.5 | 4364.8 | 0.1   |
| 25(1) | 3(1)  | 3972.8 | 3841.8 | 0.0   |
| 25(1) | 4(1)  | 3949.4 | 3813.4 | 0.0   |
| 25(1) | 5(1)  | 3938.0 | 3802.7 | 0.1   |
| 25(1) | 6(1)  | 2601.9 | 2552.9 | 0.1   |
| 25(1) | 7(1)  | 2426.4 | 2371.5 | 0.7   |
| 25(1) | 8(1)  | 2392.9 | 2339.1 | 0.2   |
| 25(1) | 9(1)  | 2308.8 | 2263.0 | 0.1   |
| 25(1) | 10(1) | 2244.5 | 2200.8 | 0.0   |
| 25(1) | 11(1) | 2127.4 | 2085.2 | 0.1   |
| 25(1) | 12(1) | 2118.1 | 2075.4 | 0.3   |
| 25(1) | 13(1) | 2073.6 | 2024.1 | 0.5   |
| 25(1) | 14(1) | 2048.4 | 2011.7 | 0.3   |
| 25(1) | 15(1) | 1979.9 | 1934.6 | 0.3   |
| 25(1) | 16(1) | 1964.3 | 1925.6 | 1.3   |
| 25(1) | 17(1) | 1952.3 | 1915.6 | 0.6   |
| 25(1) | 18(1) | 1914.1 | 1883.5 | 1.3   |
| 25(1) | 19(1) | 1839.0 | 1805.2 | 112.2 |
| 25(1) | 20(1) | 1759.2 | 1730.3 | 0.1   |
| 25(1) | 21(1) | 1746.2 | 1717.7 | 0.0   |
| 25(1) | 22(1) | 1627.7 | 1610.6 | 24.4  |
| 25(1) | 23(1) | 1615.2 | 1590.3 | 0.2   |
| 25(1) | 24(1) | 1550.2 | 1526.0 | 0.1   |
| 26(1) | 1(1)  | 4565.6 | 4377.7 | 0.0   |
| 26(1) | 2(1)  | 4552.5 | 4349.9 | 0.0   |
| 26(1) | 3(1)  | 3960.8 | 3827.1 | 0.1   |
| 26(1) | 4(1)  | 3937.4 | 3799.1 | 0.0   |
| 26(1) | 5(1)  | 3926.0 | 3788.0 | 0.2   |
| 26(1) | 6(1)  | 2589.9 | 2539.3 | 0.0   |
| 26(1) | 7(1)  | 2414.5 | 2356.4 | 0.3   |
| 26(1) | 8(1)  | 2381.0 | 2324.7 | 0.1   |
| 26(1) | 9(1)  | 2296.9 | 2247.5 | 0.2   |
| 26(1) | 10(1) | 2232.6 | 2185.8 | 0.1   |
| 26(1) | 11(1) | 2115.4 | 2070.9 | 0.0   |
| 26(1) | 12(1) | 2106.2 | 2060.4 | 0.2   |
| 26(1) | 13(1) | 2061.7 | 2008.9 | 0.8   |



|       |       |        |        |      |
|-------|-------|--------|--------|------|
| 26(1) | 14(1) | 2036.5 | 1998.5 | 0.0  |
| 26(1) | 15(1) | 1967.9 | 1919.9 | 2.2  |
| 26(1) | 16(1) | 1952.3 | 1910.6 | 0.1  |
| 26(1) | 17(1) | 1940.3 | 1902.3 | 0.3  |
| 26(1) | 18(1) | 1902.2 | 1868.6 | 0.1  |
| 26(1) | 19(1) | 1827.0 | 1788.9 | 18.7 |
| 26(1) | 20(1) | 1747.2 | 1715.7 | 0.0  |
| 26(1) | 21(1) | 1734.3 | 1703.0 | 0.0  |
| 26(1) | 22(1) | 1615.8 | 1595.6 | 0.0  |
| 26(1) | 23(1) | 1603.3 | 1575.7 | 0.0  |
| 26(1) | 24(1) | 1538.3 | 1511.5 | 0.1  |
| 26(1) | 25(1) | 1520.1 | 1493.9 | 0.4  |
| 27(1) | 1(1)  | 4519.8 | 4335.5 | 0.0  |
| 27(1) | 2(1)  | 4506.7 | 4308.7 | 0.0  |
| 27(1) | 3(1)  | 3915.0 | 3784.3 | 0.0  |
| 27(1) | 4(1)  | 3891.6 | 3755.2 | 0.0  |
| 27(1) | 5(1)  | 3880.2 | 3745.8 | 0.0  |
| 27(1) | 6(1)  | 2544.1 | 2497.3 | 0.0  |
| 27(1) | 7(1)  | 2368.7 | 2313.9 | 0.0  |
| 27(1) | 8(1)  | 2335.2 | 2282.4 | 0.0  |
| 27(1) | 9(1)  | 2251.1 | 2204.9 | 0.0  |
| 27(1) | 10(1) | 2186.8 | 2143.7 | 0.0  |
| 27(1) | 11(1) | 2069.6 | 2028.1 | 0.0  |
| 27(1) | 12(1) | 2060.4 | 2018.3 | 0.0  |
| 27(1) | 13(1) | 2015.9 | 1968.2 | 0.0  |
| 27(1) | 14(1) | 1990.7 | 1955.0 | 0.0  |
| 27(1) | 15(1) | 1922.1 | 1877.4 | 0.1  |
| 27(1) | 16(1) | 1906.5 | 1868.5 | 0.1  |
| 27(1) | 17(1) | 1894.5 | 1858.2 | 0.2  |
| 27(1) | 18(1) | 1856.4 | 1826.1 | 0.4  |
| 27(1) | 19(1) | 1781.2 | 1747.2 | 1.3  |
| 27(1) | 20(1) | 1701.4 | 1673.3 | 0.3  |
| 27(1) | 21(1) | 1688.5 | 1661.9 | 0.1  |
| 27(1) | 22(1) | 1570.0 | 1554.0 | 0.5  |
| 27(1) | 23(1) | 1557.5 | 1534.1 | 2.1  |
| 27(1) | 24(1) | 1492.5 | 1469.6 | 1.9  |
| 27(1) | 25(1) | 1474.3 | 1451.4 | 2.8  |
| 27(1) | 26(1) | 1462.3 | 1437.3 | 0.4  |
| 28(1) | 1(1)  | 4461.1 | 4278.3 | 0.0  |
| 28(1) | 2(1)  | 4448.0 | 4251.2 | 0.0  |

|       |       |        |        |     |
|-------|-------|--------|--------|-----|
| 28(1) | 3(1)  | 3856.3 | 3726.1 | 0.0 |
| 28(1) | 4(1)  | 3832.8 | 3699.0 | 0.0 |
| 28(1) | 5(1)  | 3821.4 | 3688.4 | 0.0 |
| 28(1) | 6(1)  | 2485.4 | 2441.0 | 0.0 |
| 28(1) | 7(1)  | 2309.9 | 2257.0 | 0.0 |
| 28(1) | 8(1)  | 2276.4 | 2224.6 | 0.0 |
| 28(1) | 9(1)  | 2192.3 | 2150.0 | 0.0 |
| 28(1) | 10(1) | 2128.0 | 2085.3 | 0.0 |
| 28(1) | 11(1) | 2010.8 | 1971.4 | 0.0 |
| 28(1) | 12(1) | 2001.6 | 1959.9 | 0.0 |
| 28(1) | 13(1) | 1957.1 | 1911.0 | 0.0 |
| 28(1) | 14(1) | 1931.9 | 1897.7 | 0.0 |
| 28(1) | 15(1) | 1863.4 | 1820.2 | 0.4 |
| 28(1) | 16(1) | 1847.8 | 1811.1 | 2.0 |
| 28(1) | 17(1) | 1835.7 | 1803.4 | 0.0 |
| 28(1) | 18(1) | 1797.6 | 1769.9 | 0.1 |
| 28(1) | 19(1) | 1722.5 | 1690.9 | 0.1 |
| 28(1) | 20(1) | 1642.6 | 1614.8 | 0.9 |
| 28(1) | 21(1) | 1629.7 | 1604.1 | 3.0 |
| 28(1) | 22(1) | 1511.2 | 1495.2 | 8.4 |
| 28(1) | 23(1) | 1498.7 | 1476.6 | 1.3 |
| 28(1) | 24(1) | 1433.7 | 1412.6 | 0.5 |
| 28(1) | 25(1) | 1415.5 | 1394.7 | 0.3 |
| 28(1) | 26(1) | 1403.5 | 1380.0 | 0.3 |
| 28(1) | 27(1) | 1357.7 | 1339.0 | 1.7 |
| 29(1) | 1(1)  | 4412.7 | 4232.6 | 0.0 |
| 29(1) | 2(1)  | 4399.6 | 4204.4 | 0.1 |
| 29(1) | 3(1)  | 3807.9 | 3681.6 | 0.1 |
| 29(1) | 4(1)  | 3784.5 | 3653.6 | 0.0 |
| 29(1) | 5(1)  | 3773.1 | 3643.1 | 0.0 |
| 29(1) | 6(1)  | 2437.0 | 2393.7 | 0.0 |
| 29(1) | 7(1)  | 2261.5 | 2210.9 | 0.0 |
| 29(1) | 8(1)  | 2228.0 | 2179.2 | 0.0 |
| 29(1) | 9(1)  | 2143.9 | 2102.2 | 0.1 |
| 29(1) | 10(1) | 2079.6 | 2040.5 | 0.0 |
| 29(1) | 11(1) | 1962.5 | 1925.6 | 0.0 |
| 29(1) | 12(1) | 1953.2 | 1915.5 | 0.0 |
| 29(1) | 13(1) | 1908.7 | 1864.0 | 0.2 |
| 29(1) | 14(1) | 1883.5 | 1852.1 | 0.0 |
| 29(1) | 15(1) | 1815.0 | 1774.9 | 6.6 |

|       |       |        |        |      |
|-------|-------|--------|--------|------|
| 29(1) | 16(1) | 1799.4 | 1763.7 | 0.7  |
| 29(1) | 17(1) | 1787.4 | 1755.7 | 0.2  |
| 29(1) | 18(1) | 1749.2 | 1723.6 | 0.2  |
| 29(1) | 19(1) | 1674.1 | 1645.1 | 7.4  |
| 29(1) | 20(1) | 1594.3 | 1570.4 | 0.1  |
| 29(1) | 21(1) | 1581.3 | 1557.6 | 0.1  |
| 29(1) | 22(1) | 1462.8 | 1450.2 | 0.0  |
| 29(1) | 23(1) | 1450.3 | 1430.6 | 0.0  |
| 29(1) | 24(1) | 1385.3 | 1366.5 | 0.5  |
| 29(1) | 25(1) | 1367.1 | 1349.5 | 1.9  |
| 29(1) | 26(1) | 1355.2 | 1335.6 | 3.4  |
| 29(1) | 27(1) | 1309.4 | 1292.1 | 51.7 |
| 29(1) | 28(1) | 1250.6 | 1234.6 | 0.1  |
| 30(1) | 1(1)  | 4395.6 | 4213.7 | 0.0  |
| 30(1) | 2(1)  | 4382.5 | 4185.9 | 0.0  |
| 30(1) | 3(1)  | 3790.8 | 3662.8 | 0.0  |
| 30(1) | 4(1)  | 3767.4 | 3634.6 | 0.0  |
| 30(1) | 5(1)  | 3756.0 | 3624.4 | 0.0  |
| 30(1) | 6(1)  | 2419.9 | 2376.7 | 0.0  |
| 30(1) | 7(1)  | 2244.5 | 2192.6 | 0.0  |
| 30(1) | 8(1)  | 2211.0 | 2160.7 | 0.0  |
| 30(1) | 9(1)  | 2126.9 | 2082.8 | 0.0  |
| 30(1) | 10(1) | 2062.6 | 2021.8 | 0.0  |
| 30(1) | 11(1) | 1945.4 | 1906.9 | 0.0  |
| 30(1) | 12(1) | 1936.2 | 1896.1 | 0.1  |
| 30(1) | 13(1) | 1891.7 | 1845.1 | 0.0  |
| 30(1) | 14(1) | 1866.5 | 1833.0 | 0.1  |
| 30(1) | 15(1) | 1797.9 | 1755.1 | 1.5  |
| 30(1) | 16(1) | 1782.3 | 1746.1 | 0.4  |
| 30(1) | 17(1) | 1770.3 | 1736.7 | 0.3  |
| 30(1) | 18(1) | 1732.2 | 1704.3 | 0.1  |
| 30(1) | 19(1) | 1657.0 | 1626.4 | 8.4  |
| 30(1) | 20(1) | 1577.2 | 1550.9 | 1.4  |
| 30(1) | 21(1) | 1564.3 | 1538.8 | 0.0  |
| 30(1) | 22(1) | 1445.8 | 1431.3 | 0.2  |
| 30(1) | 23(1) | 1433.3 | 1411.7 | 0.1  |
| 30(1) | 24(1) | 1368.3 | 1348.1 | 6.2  |
| 30(1) | 25(1) | 1350.1 | 1329.9 | 0.6  |
| 30(1) | 26(1) | 1338.1 | 1315.0 | 1.5  |
| 30(1) | 27(1) | 1292.3 | 1274.1 | 0.4  |

|       |       |        |        |       |
|-------|-------|--------|--------|-------|
| 30(1) | 28(1) | 1233.5 | 1216.2 | 0.3   |
| 30(1) | 29(1) | 1185.2 | 1170.2 | 0.2   |
| 31(1) | 1(1)  | 4337.2 | 4158.1 | 0.0   |
| 31(1) | 2(1)  | 4324.1 | 4131.0 | 0.0   |
| 31(1) | 3(1)  | 3732.4 | 3607.4 | 0.0   |
| 31(1) | 4(1)  | 3708.9 | 3579.3 | 0.1   |
| 31(1) | 5(1)  | 3697.5 | 3568.7 | 0.0   |
| 31(1) | 6(1)  | 2361.5 | 2322.3 | 0.0   |
| 31(1) | 7(1)  | 2186.0 | 2135.9 | 0.3   |
| 31(1) | 8(1)  | 2152.5 | 2105.1 | 0.1   |
| 31(1) | 9(1)  | 2068.4 | 2028.0 | 0.0   |
| 31(1) | 10(1) | 2004.1 | 1965.1 | 0.0   |
| 31(1) | 11(1) | 1886.9 | 1850.9 | 0.1   |
| 31(1) | 12(1) | 1877.7 | 1841.3 | 0.1   |
| 31(1) | 13(1) | 1833.2 | 1789.3 | 166.2 |
| 31(1) | 14(1) | 1808.0 | 1778.8 | 0.2   |
| 31(1) | 15(1) | 1739.5 | 1700.0 | 0.1   |
| 31(1) | 16(1) | 1723.9 | 1691.0 | 0.2   |
| 31(1) | 17(1) | 1711.8 | 1681.5 | 0.9   |
| 31(1) | 18(1) | 1673.7 | 1650.5 | 8.0   |
| 31(1) | 19(1) | 1598.6 | 1570.7 | 0.5   |
| 31(1) | 20(1) | 1518.7 | 1496.3 | 1.1   |
| 31(1) | 21(1) | 1505.8 | 1483.4 | 0.1   |
| 31(1) | 22(1) | 1387.3 | 1375.7 | 0.0   |
| 31(1) | 23(1) | 1374.8 | 1356.3 | 0.1   |
| 31(1) | 24(1) | 1309.8 | 1292.0 | 3.0   |
| 31(1) | 25(1) | 1291.6 | 1274.8 | 5.8   |
| 31(1) | 26(1) | 1279.6 | 1258.8 | 35.6  |
| 31(1) | 27(1) | 1233.8 | 1217.6 | 0.0   |
| 31(1) | 28(1) | 1175.1 | 1160.1 | 0.3   |
| 31(1) | 29(1) | 1126.7 | 1114.8 | 0.1   |
| 31(1) | 30(1) | 1109.6 | 1096.0 | 0.5   |
| 32(1) | 1(1)  | 4309.3 | 4090.4 | 0.0   |
| 32(1) | 2(1)  | 4296.2 | 4053.6 | 1.4   |
| 32(1) | 3(1)  | 3704.5 | 3539.8 | 0.0   |
| 32(1) | 4(1)  | 3681.1 | 3511.7 | 0.0   |
| 32(1) | 5(1)  | 3669.7 | 3500.2 | 0.2   |
| 32(1) | 6(1)  | 2333.6 | 2252.0 | 0.0   |
| 32(1) | 7(1)  | 2158.2 | 2070.1 | 0.0   |
| 32(1) | 8(1)  | 2124.6 | 2038.4 | 0.0   |

|       |       |        |        |      |
|-------|-------|--------|--------|------|
| 32(1) | 9(1)  | 2040.5 | 1961.1 | 0.0  |
| 32(1) | 10(1) | 1976.2 | 1899.5 | 0.0  |
| 32(1) | 11(1) | 1859.1 | 1784.4 | 0.2  |
| 32(1) | 12(1) | 1849.8 | 1774.9 | 0.2  |
| 32(1) | 13(1) | 1805.3 | 1719.2 | 2.0  |
| 32(1) | 14(1) | 1780.2 | 1710.2 | 0.2  |
| 32(1) | 15(1) | 1711.6 | 1634.4 | 0.5  |
| 32(1) | 16(1) | 1696.0 | 1624.9 | 0.1  |
| 32(1) | 17(1) | 1684.0 | 1614.2 | 0.0  |
| 32(1) | 18(1) | 1645.9 | 1583.5 | 0.0  |
| 32(1) | 19(1) | 1570.7 | 1505.4 | 0.2  |
| 32(1) | 20(1) | 1490.9 | 1426.1 | 0.0  |
| 32(1) | 21(1) | 1477.9 | 1414.0 | 27.1 |
| 32(1) | 22(1) | 1359.5 | 1308.1 | 0.1  |
| 32(1) | 23(1) | 1346.9 | 1289.5 | 7.9  |
| 32(1) | 24(1) | 1281.9 | 1223.3 | 0.7  |
| 32(1) | 25(1) | 1263.7 | 1206.9 | 1.4  |
| 32(1) | 26(1) | 1251.8 | 1192.3 | 1.0  |
| 32(1) | 27(1) | 1206.0 | 1144.6 | 20.5 |
| 32(1) | 28(1) | 1147.2 | 1092.5 | 2.3  |
| 32(1) | 29(1) | 1098.8 | 1047.4 | 0.4  |
| 32(1) | 30(1) | 1081.8 | 1027.6 | 0.1  |
| 32(1) | 31(1) | 1023.3 | 972.5  | 0.0  |
| 33(1) | 1(1)  | 4283.6 | 4101.1 | 0.0  |
| 33(1) | 2(1)  | 4270.5 | 4074.1 | 0.0  |
| 33(1) | 3(1)  | 3678.8 | 3550.1 | 0.0  |
| 33(1) | 4(1)  | 3655.4 | 3522.1 | 0.0  |
| 33(1) | 5(1)  | 3644.0 | 3511.1 | 0.0  |
| 33(1) | 6(1)  | 2307.9 | 2263.8 | 0.0  |
| 33(1) | 7(1)  | 2132.5 | 2079.7 | 0.0  |
| 33(1) | 8(1)  | 2098.9 | 2047.8 | 0.0  |
| 33(1) | 9(1)  | 2014.8 | 1970.6 | 0.0  |
| 33(1) | 10(1) | 1950.5 | 1910.5 | 0.0  |
| 33(1) | 11(1) | 1833.4 | 1793.6 | 1.9  |
| 33(1) | 12(1) | 1824.1 | 1784.9 | 0.0  |
| 33(1) | 13(1) | 1779.6 | 1733.9 | 0.1  |
| 33(1) | 14(1) | 1754.5 | 1720.4 | 0.0  |
| 33(1) | 15(1) | 1685.9 | 1643.3 | 0.0  |
| 33(1) | 16(1) | 1670.3 | 1634.1 | 2.7  |
| 33(1) | 17(1) | 1658.3 | 1624.5 | 14.9 |

|       |       |        |        |     |
|-------|-------|--------|--------|-----|
| 33(1) | 18(1) | 1620.2 | 1591.9 | 0.2 |
| 33(1) | 19(1) | 1545.0 | 1514.5 | 5.3 |
| 33(1) | 20(1) | 1465.2 | 1438.5 | 0.4 |
| 33(1) | 21(1) | 1452.2 | 1425.5 | 3.7 |
| 33(1) | 22(1) | 1333.8 | 1318.4 | 2.6 |
| 33(1) | 23(1) | 1321.3 | 1298.7 | 0.4 |
| 33(1) | 24(1) | 1256.2 | 1233.7 | 1.8 |
| 33(1) | 25(1) | 1238.0 | 1217.2 | 0.1 |
| 33(1) | 26(1) | 1226.1 | 1203.3 | 0.1 |
| 33(1) | 27(1) | 1180.3 | 1161.2 | 4.6 |
| 33(1) | 28(1) | 1121.5 | 1102.1 | 0.4 |
| 33(1) | 29(1) | 1073.1 | 1057.3 | 0.0 |
| 33(1) | 30(1) | 1056.1 | 1038.5 | 1.6 |
| 33(1) | 31(1) | 997.6  | 983.3  | 0.6 |
| 33(1) | 32(1) | 969.7  | 913.7  | 0.5 |
| 34(1) | 1(1)  | 4241.8 | 4062.0 | 0.0 |
| 34(1) | 2(1)  | 4228.7 | 4034.6 | 0.0 |
| 34(1) | 3(1)  | 3637.0 | 3511.4 | 0.0 |
| 34(1) | 4(1)  | 3613.5 | 3483.3 | 0.0 |
| 34(1) | 5(1)  | 3602.1 | 3472.6 | 0.0 |
| 34(1) | 6(1)  | 2266.1 | 2223.9 | 0.0 |
| 34(1) | 7(1)  | 2090.6 | 2041.2 | 0.0 |
| 34(1) | 8(1)  | 2057.1 | 2009.6 | 0.0 |
| 34(1) | 9(1)  | 1973.0 | 1932.2 | 0.0 |
| 34(1) | 10(1) | 1908.7 | 1870.5 | 0.2 |
| 34(1) | 11(1) | 1791.5 | 1756.0 | 0.7 |
| 34(1) | 12(1) | 1782.3 | 1745.7 | 0.3 |
| 34(1) | 13(1) | 1737.8 | 1694.6 | 0.9 |
| 34(1) | 14(1) | 1712.6 | 1681.7 | 0.2 |
| 34(1) | 15(1) | 1644.1 | 1604.5 | 0.3 |
| 34(1) | 16(1) | 1628.5 | 1595.2 | 3.3 |
| 34(1) | 17(1) | 1616.4 | 1586.2 | 1.8 |
| 34(1) | 18(1) | 1578.3 | 1553.9 | 0.4 |
| 34(1) | 19(1) | 1503.2 | 1474.7 | 0.1 |
| 34(1) | 20(1) | 1423.3 | 1400.2 | 0.0 |
| 34(1) | 21(1) | 1410.4 | 1387.4 | 0.9 |
| 34(1) | 22(1) | 1291.9 | 1280.0 | 2.6 |
| 34(1) | 23(1) | 1279.4 | 1261.5 | 4.4 |
| 34(1) | 24(1) | 1214.4 | 1196.4 | 0.3 |
| 34(1) | 25(1) | 1196.2 | 1178.7 | 0.7 |

|       |       |        |        |      |
|-------|-------|--------|--------|------|
| 34(1) | 26(1) | 1184.2 | 1162.6 | 87.4 |
| 34(1) | 27(1) | 1138.4 | 1120.5 | 1.0  |
| 34(1) | 28(1) | 1079.7 | 1064.0 | 0.0  |
| 34(1) | 29(1) | 1031.3 | 1018.6 | 0.0  |
| 34(1) | 30(1) | 1014.2 | 1000.1 | 0.1  |
| 34(1) | 31(1) | 955.8  | 944.3  | 0.1  |
| 34(1) | 32(1) | 927.9  | 872.8  | 0.8  |
| 34(1) | 33(1) | 902.2  | 886.2  | 0.0  |
| 35(1) | 1(1)  | 4196.2 | 4026.9 | 1.5  |
| 35(1) | 2(1)  | 4183.1 | 3997.6 | 0.0  |
| 35(1) | 3(1)  | 3591.4 | 3474.4 | 0.0  |
| 35(1) | 4(1)  | 3568.0 | 3449.3 | 0.0  |
| 35(1) | 5(1)  | 3556.6 | 3435.5 | 0.0  |
| 35(1) | 6(1)  | 2220.5 | 2188.3 | 0.0  |
| 35(1) | 7(1)  | 2045.1 | 2004.0 | 0.0  |
| 35(1) | 8(1)  | 2011.6 | 1971.3 | 0.0  |
| 35(1) | 9(1)  | 1927.5 | 1894.9 | 0.0  |
| 35(1) | 10(1) | 1863.2 | 1830.7 | 0.0  |
| 35(1) | 11(1) | 1746.0 | 1719.9 | 0.0  |
| 35(1) | 12(1) | 1736.8 | 1706.4 | 0.0  |
| 35(1) | 13(1) | 1692.3 | 1657.9 | 0.0  |
| 35(1) | 14(1) | 1667.1 | 1644.7 | 0.0  |
| 35(1) | 15(1) | 1598.5 | 1563.8 | 0.0  |
| 35(1) | 16(1) | 1582.9 | 1557.4 | 0.0  |
| 35(1) | 17(1) | 1570.9 | 1553.8 | 0.0  |
| 35(1) | 18(1) | 1532.8 | 1516.4 | 0.0  |
| 35(1) | 19(1) | 1457.6 | 1438.6 | 0.0  |
| 35(1) | 20(1) | 1377.8 | 1363.1 | 0.0  |
| 35(1) | 21(1) | 1364.9 | 1351.1 | 4.8  |
| 35(1) | 22(1) | 1246.4 | 1250.6 | 32.2 |
| 35(1) | 23(1) | 1233.9 | 1225.1 | 3.1  |
| 35(1) | 24(1) | 1168.9 | 1159.9 | 2.9  |
| 35(1) | 25(1) | 1150.7 | 1141.6 | 0.0  |
| 35(1) | 26(1) | 1138.7 | 1120.5 | 0.0  |
| 35(1) | 27(1) | 1092.9 | 1085.8 | 0.6  |
| 35(1) | 28(1) | 1034.1 | 1023.8 | 4.0  |
| 35(1) | 29(1) | 985.8  | 981.8  | 0.0  |
| 35(1) | 30(1) | 968.7  | 962.5  | 0.0  |
| 35(1) | 31(1) | 910.3  | 907.6  | 0.0  |
| 35(1) | 32(1) | 882.4  | 840.1  | 0.0  |

|       |       |        |        |      |
|-------|-------|--------|--------|------|
| 35(1) | 33(1) | 856.7  | 850.5  | 1.4  |
| 35(1) | 34(1) | 814.8  | 811.8  | 0.1  |
| 36(1) | 1(1)  | 4174.5 | 3997.1 | 0.0  |
| 36(1) | 2(1)  | 4161.4 | 3969.7 | 0.0  |
| 36(1) | 3(1)  | 3569.7 | 3446.2 | 0.0  |
| 36(1) | 4(1)  | 3546.3 | 3418.0 | 0.0  |
| 36(1) | 5(1)  | 3534.9 | 3407.5 | 0.0  |
| 36(1) | 6(1)  | 2198.8 | 2159.5 | 0.1  |
| 36(1) | 7(1)  | 2023.4 | 1975.2 | 0.3  |
| 36(1) | 8(1)  | 1989.9 | 1944.3 | 0.0  |
| 36(1) | 9(1)  | 1905.8 | 1866.4 | 0.1  |
| 36(1) | 10(1) | 1841.5 | 1805.3 | 2.8  |
| 36(1) | 11(1) | 1724.3 | 1691.5 | 3.9  |
| 36(1) | 12(1) | 1715.1 | 1679.8 | 0.6  |
| 36(1) | 13(1) | 1670.6 | 1629.4 | 3.2  |
| 36(1) | 14(1) | 1645.4 | 1616.7 | 0.3  |
| 36(1) | 15(1) | 1576.8 | 1539.5 | 0.2  |
| 36(1) | 16(1) | 1561.2 | 1530.4 | 0.6  |
| 36(1) | 17(1) | 1549.2 | 1520.8 | 4.4  |
| 36(1) | 18(1) | 1511.1 | 1488.6 | 0.3  |
| 36(1) | 19(1) | 1435.9 | 1409.7 | 0.1  |
| 36(1) | 20(1) | 1356.1 | 1338.6 | 0.8  |
| 36(1) | 21(1) | 1343.2 | 1322.1 | 0.3  |
| 36(1) | 22(1) | 1224.7 | 1214.7 | 0.2  |
| 36(1) | 23(1) | 1212.2 | 1194.8 | 10.9 |
| 36(1) | 24(1) | 1147.2 | 1130.6 | 6.9  |
| 36(1) | 25(1) | 1129.0 | 1112.9 | 1.7  |
| 36(1) | 26(1) | 1117.0 | 1098.6 | 0.1  |
| 36(1) | 27(1) | 1071.2 | 1056.4 | 0.0  |
| 36(1) | 28(1) | 1012.4 | 999.2  | 0.0  |
| 36(1) | 29(1) | 964.0  | 953.5  | 0.0  |
| 36(1) | 30(1) | 947.0  | 934.4  | 0.0  |
| 36(1) | 31(1) | 888.5  | 879.3  | 0.0  |
| 36(1) | 32(1) | 860.7  | 811.7  | 0.1  |
| 36(1) | 33(1) | 835.0  | 822.1  | 0.0  |
| 36(1) | 34(1) | 793.1  | 783.7  | 0.1  |
| 36(1) | 35(1) | 747.6  | 746.4  | 0.1  |
| 37(1) | 1(1)  | 4119.7 | 3942.1 | 0.0  |
| 37(1) | 2(1)  | 4106.6 | 3914.7 | 0.0  |
| 37(1) | 3(1)  | 3514.9 | 3391.5 | 0.0  |



|       |       |        |        |      |
|-------|-------|--------|--------|------|
| 37(1) | 4(1)  | 3491.5 | 3363.3 | 0.0  |
| 37(1) | 5(1)  | 3480.1 | 3353.0 | 0.0  |
| 37(1) | 6(1)  | 2144.0 | 2105.1 | 0.1  |
| 37(1) | 7(1)  | 1968.6 | 1919.9 | 0.0  |
| 37(1) | 8(1)  | 1935.1 | 1888.4 | 0.0  |
| 37(1) | 9(1)  | 1851.0 | 1813.1 | 3.2  |
| 37(1) | 10(1) | 1786.7 | 1750.1 | 0.2  |
| 37(1) | 11(1) | 1669.5 | 1638.4 | 54.5 |
| 37(1) | 12(1) | 1660.3 | 1627.7 | 0.6  |
| 37(1) | 13(1) | 1615.8 | 1574.5 | 0.8  |
| 37(1) | 14(1) | 1590.6 | 1561.0 | 0.5  |
| 37(1) | 15(1) | 1522.0 | 1483.8 | 1.4  |
| 37(1) | 16(1) | 1506.4 | 1475.6 | 0.0  |
| 37(1) | 17(1) | 1494.4 | 1465.5 | 0.2  |
| 37(1) | 18(1) | 1456.3 | 1433.1 | 0.5  |
| 37(1) | 19(1) | 1381.1 | 1355.2 | 0.5  |
| 37(1) | 20(1) | 1301.3 | 1279.5 | 4.9  |
| 37(1) | 21(1) | 1288.4 | 1267.9 | 4.7  |
| 37(1) | 22(1) | 1169.9 | 1160.0 | 0.0  |
| 37(1) | 23(1) | 1157.4 | 1140.2 | 0.0  |
| 37(1) | 24(1) | 1092.4 | 1076.0 | 0.2  |
| 37(1) | 25(1) | 1074.2 | 1058.5 | 0.2  |
| 37(1) | 26(1) | 1062.2 | 1043.7 | 0.1  |
| 37(1) | 27(1) | 1016.4 | 1001.8 | 0.1  |
| 37(1) | 28(1) | 957.6  | 944.4  | 0.0  |
| 37(1) | 29(1) | 909.3  | 898.7  | 0.0  |
| 37(1) | 30(1) | 892.2  | 879.4  | 0.0  |
| 37(1) | 31(1) | 833.7  | 824.6  | 0.0  |
| 37(1) | 32(1) | 805.9  | 757.5  | 0.2  |
| 37(1) | 33(1) | 780.2  | 766.9  | 0.0  |
| 37(1) | 34(1) | 738.3  | 728.7  | 0.0  |
| 37(1) | 35(1) | 692.8  | 691.7  | 0.0  |
| 37(1) | 36(1) | 671.1  | 662.9  | 0.0  |
| 38(1) | 1(1)  | 4079.5 | 3901.9 | 0.0  |
| 38(1) | 2(1)  | 4066.4 | 3874.6 | 0.1  |
| 38(1) | 3(1)  | 3474.7 | 3351.3 | 0.0  |
| 38(1) | 4(1)  | 3451.3 | 3323.2 | 0.0  |
| 38(1) | 5(1)  | 3439.9 | 3312.7 | 0.0  |
| 38(1) | 6(1)  | 2103.8 | 2065.0 | 0.1  |
| 38(1) | 7(1)  | 1928.4 | 1881.4 | 0.0  |

|       |       |        |        |      |
|-------|-------|--------|--------|------|
| 38(1) | 8(1)  | 1894.9 | 1848.9 | 0.0  |
| 38(1) | 9(1)  | 1810.8 | 1772.4 | 0.1  |
| 38(1) | 10(1) | 1746.4 | 1710.4 | 0.0  |
| 38(1) | 11(1) | 1629.3 | 1596.2 | 16.0 |
| 38(1) | 12(1) | 1620.1 | 1585.4 | 0.4  |
| 38(1) | 13(1) | 1575.5 | 1534.4 | 0.1  |
| 38(1) | 14(1) | 1550.4 | 1522.0 | 0.0  |
| 38(1) | 15(1) | 1481.8 | 1444.1 | 0.2  |
| 38(1) | 16(1) | 1466.2 | 1435.0 | 0.0  |
| 38(1) | 17(1) | 1454.2 | 1425.3 | 0.0  |
| 38(1) | 18(1) | 1416.1 | 1393.0 | 0.1  |
| 38(1) | 19(1) | 1340.9 | 1315.4 | 0.9  |
| 38(1) | 20(1) | 1261.1 | 1239.7 | 0.4  |
| 38(1) | 21(1) | 1248.1 | 1227.3 | 1.8  |
| 38(1) | 22(1) | 1129.7 | 1119.6 | 0.3  |
| 38(1) | 23(1) | 1117.2 | 1099.6 | 0.0  |
| 38(1) | 24(1) | 1052.1 | 1035.3 | 1.3  |
| 38(1) | 25(1) | 1033.9 | 1018.8 | 0.1  |
| 38(1) | 26(1) | 1022.0 | 1004.3 | 0.1  |
| 38(1) | 27(1) | 976.2  | 962.1  | 0.4  |
| 38(1) | 28(1) | 917.4  | 904.4  | 0.2  |
| 38(1) | 29(1) | 869.0  | 858.6  | 0.3  |
| 38(1) | 30(1) | 852.0  | 839.0  | 0.0  |
| 38(1) | 31(1) | 793.5  | 783.7  | 0.3  |
| 38(1) | 32(1) | 765.7  | 718.2  | 0.2  |
| 38(1) | 33(1) | 740.0  | 727.0  | 0.4  |
| 38(1) | 34(1) | 698.1  | 689.0  | 0.0  |
| 38(1) | 35(1) | 652.6  | 651.6  | 0.3  |
| 38(1) | 36(1) | 630.9  | 622.4  | 0.0  |
| 38(1) | 37(1) | 576.1  | 567.5  | 0.0  |
| 39(1) | 1(1)  | 4040.1 | 3862.7 | 0.0  |
| 39(1) | 2(1)  | 4027.0 | 3835.4 | 0.0  |
| 39(1) | 3(1)  | 3435.3 | 3312.0 | 0.0  |
| 39(1) | 4(1)  | 3411.9 | 3283.6 | 0.0  |
| 39(1) | 5(1)  | 3400.5 | 3273.1 | 0.0  |
| 39(1) | 6(1)  | 2064.4 | 2025.2 | 0.0  |
| 39(1) | 7(1)  | 1889.0 | 1841.8 | 0.0  |
| 39(1) | 8(1)  | 1855.5 | 1810.0 | 0.0  |
| 39(1) | 9(1)  | 1771.4 | 1732.9 | 0.0  |
| 39(1) | 10(1) | 1707.1 | 1670.9 | 0.1  |

|       |       |        |        |     |
|-------|-------|--------|--------|-----|
| 39(1) | 11(1) | 1589.9 | 1556.0 | 0.0 |
| 39(1) | 12(1) | 1580.7 | 1545.9 | 0.1 |
| 39(1) | 13(1) | 1536.2 | 1495.0 | 0.0 |
| 39(1) | 14(1) | 1511.0 | 1482.1 | 0.0 |
| 39(1) | 15(1) | 1442.4 | 1404.7 | 0.0 |
| 39(1) | 16(1) | 1426.8 | 1395.5 | 0.0 |
| 39(1) | 17(1) | 1414.8 | 1385.7 | 0.0 |
| 39(1) | 18(1) | 1376.7 | 1353.8 | 0.0 |
| 39(1) | 19(1) | 1301.5 | 1275.3 | 2.2 |
| 39(1) | 20(1) | 1221.7 | 1200.4 | 0.0 |
| 39(1) | 21(1) | 1208.8 | 1187.5 | 1.5 |
| 39(1) | 22(1) | 1090.3 | 1080.5 | 0.0 |
| 39(1) | 23(1) | 1077.8 | 1060.7 | 2.8 |
| 39(1) | 24(1) | 1012.8 | 996.5  | 0.0 |
| 39(1) | 25(1) | 994.6  | 979.2  | 0.0 |
| 39(1) | 26(1) | 982.6  | 964.7  | 0.0 |
| 39(1) | 27(1) | 936.8  | 922.1  | 0.1 |
| 39(1) | 28(1) | 878.0  | 864.2  | 0.0 |
| 39(1) | 29(1) | 829.7  | 819.2  | 0.0 |
| 39(1) | 30(1) | 812.6  | 800.2  | 0.0 |
| 39(1) | 31(1) | 754.1  | 745.9  | 0.0 |
| 39(1) | 32(1) | 726.3  | 677.5  | 0.0 |
| 39(1) | 33(1) | 700.6  | 687.4  | 0.0 |
| 39(1) | 34(1) | 658.7  | 648.5  | 0.1 |
| 39(1) | 35(1) | 613.2  | 612.2  | 0.3 |
| 39(1) | 36(1) | 591.5  | 583.1  | 0.0 |
| 39(1) | 37(1) | 536.7  | 528.2  | 0.0 |
| 39(1) | 38(1) | 496.5  | 488.7  | 0.1 |
| 40(1) | 1(1)  | 3990.9 | 3814.0 | 0.0 |
| 40(1) | 2(1)  | 3977.8 | 3786.0 | 0.0 |
| 40(1) | 3(1)  | 3386.1 | 3263.1 | 0.0 |
| 40(1) | 4(1)  | 3362.7 | 3235.0 | 0.0 |
| 40(1) | 5(1)  | 3351.3 | 3225.1 | 0.0 |
| 40(1) | 6(1)  | 2015.2 | 1976.5 | 0.2 |
| 40(1) | 7(1)  | 1839.8 | 1793.7 | 0.9 |
| 40(1) | 8(1)  | 1806.3 | 1761.4 | 0.5 |
| 40(1) | 9(1)  | 1722.2 | 1684.3 | 0.0 |
| 40(1) | 10(1) | 1657.8 | 1622.9 | 0.0 |
| 40(1) | 11(1) | 1540.7 | 1506.6 | 3.3 |
| 40(1) | 12(1) | 1531.4 | 1497.1 | 0.0 |

|       |       |        |        |     |
|-------|-------|--------|--------|-----|
| 40(1) | 13(1) | 1486.9 | 1445.4 | 0.6 |
| 40(1) | 14(1) | 1461.8 | 1433.1 | 0.3 |
| 40(1) | 15(1) | 1393.2 | 1355.8 | 0.0 |
| 40(1) | 16(1) | 1377.6 | 1347.0 | 0.3 |
| 40(1) | 17(1) | 1365.6 | 1337.0 | 0.1 |
| 40(1) | 18(1) | 1327.5 | 1304.7 | 0.3 |
| 40(1) | 19(1) | 1252.3 | 1226.6 | 1.2 |
| 40(1) | 20(1) | 1172.5 | 1151.7 | 1.0 |
| 40(1) | 21(1) | 1159.5 | 1139.2 | 0.0 |
| 40(1) | 22(1) | 1041.1 | 1031.2 | 0.0 |
| 40(1) | 23(1) | 1028.6 | 1011.8 | 0.0 |
| 40(1) | 24(1) | 963.5  | 947.4  | 0.1 |
| 40(1) | 25(1) | 945.3  | 929.8  | 0.0 |
| 40(1) | 26(1) | 933.4  | 915.3  | 0.0 |
| 40(1) | 27(1) | 887.6  | 873.7  | 0.0 |
| 40(1) | 28(1) | 828.8  | 815.8  | 0.0 |
| 40(1) | 29(1) | 780.4  | 770.4  | 0.3 |
| 40(1) | 30(1) | 763.4  | 750.8  | 0.3 |
| 40(1) | 31(1) | 704.9  | 695.8  | 0.0 |
| 40(1) | 32(1) | 677.1  | 629.3  | 0.4 |
| 40(1) | 33(1) | 651.4  | 638.9  | 0.0 |
| 40(1) | 34(1) | 609.5  | 600.6  | 0.2 |
| 40(1) | 35(1) | 564.0  | 564.0  | 0.0 |
| 40(1) | 36(1) | 542.3  | 534.7  | 0.0 |
| 40(1) | 37(1) | 487.5  | 479.7  | 0.9 |
| 40(1) | 38(1) | 447.3  | 439.0  | 0.0 |
| 40(1) | 39(1) | 407.9  | 399.8  | 0.0 |
| 41(1) | 1(1)  | 3907.0 | 3726.5 | 0.1 |
| 41(1) | 2(1)  | 3893.9 | 3698.0 | 0.0 |
| 41(1) | 3(1)  | 3302.2 | 3174.8 | 0.0 |
| 41(1) | 4(1)  | 3278.7 | 3146.9 | 0.0 |
| 41(1) | 5(1)  | 3267.3 | 3136.0 | 0.0 |
| 41(1) | 6(1)  | 1931.3 | 1887.8 | 0.2 |
| 41(1) | 7(1)  | 1755.8 | 1705.4 | 0.1 |
| 41(1) | 8(1)  | 1722.3 | 1673.1 | 0.0 |
| 41(1) | 9(1)  | 1638.2 | 1596.0 | 0.3 |
| 41(1) | 10(1) | 1573.9 | 1534.1 | 0.0 |
| 41(1) | 11(1) | 1456.7 | 1419.3 | 0.0 |
| 41(1) | 12(1) | 1447.5 | 1409.1 | 0.0 |
| 41(1) | 13(1) | 1403.0 | 1357.7 | 0.4 |

|       |       |        |        |      |
|-------|-------|--------|--------|------|
| 41(1) | 14(1) | 1377.8 | 1345.1 | 0.0  |
| 41(1) | 15(1) | 1309.3 | 1268.0 | 54.3 |
| 41(1) | 16(1) | 1293.7 | 1258.3 | 0.6  |
| 41(1) | 17(1) | 1281.6 | 1248.8 | 0.1  |
| 41(1) | 18(1) | 1243.5 | 1216.6 | 0.0  |
| 41(1) | 19(1) | 1168.4 | 1138.6 | 0.1  |
| 41(1) | 20(1) | 1088.5 | 1063.3 | 0.0  |
| 41(1) | 21(1) | 1075.6 | 1049.9 | 0.0  |
| 41(1) | 22(1) | 957.1  | 943.1  | 0.1  |
| 41(1) | 23(1) | 944.6  | 923.1  | 0.2  |
| 41(1) | 24(1) | 879.6  | 858.7  | 0.1  |
| 41(1) | 25(1) | 861.4  | 842.2  | 0.0  |
| 41(1) | 26(1) | 849.4  | 827.4  | 0.0  |
| 41(1) | 27(1) | 803.6  | 784.4  | 0.0  |
| 41(1) | 28(1) | 744.9  | 727.8  | 0.0  |
| 41(1) | 29(1) | 696.5  | 681.8  | 0.0  |
| 41(1) | 30(1) | 679.4  | 663.2  | 0.0  |
| 41(1) | 31(1) | 621.0  | 607.4  | 0.0  |
| 41(1) | 32(1) | 593.1  | 537.4  | 0.1  |
| 41(1) | 33(1) | 567.4  | 550.1  | 0.1  |
| 41(1) | 34(1) | 525.6  | 511.5  | 0.0  |
| 41(1) | 35(1) | 480.1  | 480.8  | 0.3  |
| 41(1) | 36(1) | 458.3  | 446.1  | 0.0  |
| 41(1) | 37(1) | 403.5  | 391.7  | 0.0  |
| 41(1) | 38(1) | 363.3  | 350.6  | 0.0  |
| 41(1) | 39(1) | 323.9  | 312.1  | 0.0  |
| 41(1) | 40(1) | 274.7  | 261.7  | 0.0  |
| 42(1) | 1(1)  | 3873.8 | 3690.4 | 0.0  |
| 42(1) | 2(1)  | 3860.7 | 3661.9 | 0.1  |
| 42(1) | 3(1)  | 3269.0 | 3138.8 | 0.0  |
| 42(1) | 4(1)  | 3245.5 | 3110.6 | 0.0  |
| 42(1) | 5(1)  | 3234.1 | 3100.0 | 0.0  |
| 42(1) | 6(1)  | 1898.1 | 1851.8 | 1.3  |
| 42(1) | 7(1)  | 1722.6 | 1669.6 | 0.1  |
| 42(1) | 8(1)  | 1689.1 | 1637.3 | 0.1  |
| 42(1) | 9(1)  | 1605.0 | 1560.1 | 0.1  |
| 42(1) | 10(1) | 1540.7 | 1498.0 | 0.0  |
| 42(1) | 11(1) | 1423.6 | 1383.3 | 0.0  |
| 42(1) | 12(1) | 1414.3 | 1373.4 | 0.1  |
| 42(1) | 13(1) | 1369.8 | 1321.7 | 0.9  |

|       |       |        |        |     |
|-------|-------|--------|--------|-----|
| 42(1) | 14(1) | 1344.6 | 1309.0 | 0.3 |
| 42(1) | 15(1) | 1276.1 | 1231.5 | 0.1 |
| 42(1) | 16(1) | 1260.5 | 1222.6 | 0.1 |
| 42(1) | 17(1) | 1248.4 | 1212.6 | 0.1 |
| 42(1) | 18(1) | 1210.3 | 1180.8 | 2.6 |
| 42(1) | 19(1) | 1135.2 | 1102.5 | 0.3 |
| 42(1) | 20(1) | 1055.3 | 1027.1 | 0.0 |
| 42(1) | 21(1) | 1042.4 | 1013.5 | 0.0 |
| 42(1) | 22(1) | 923.9  | 907.3  | 0.0 |
| 42(1) | 23(1) | 911.4  | 887.7  | 0.0 |
| 42(1) | 24(1) | 846.4  | 821.8  | 1.3 |
| 42(1) | 25(1) | 828.2  | 806.0  | 0.0 |
| 42(1) | 26(1) | 816.2  | 791.2  | 0.0 |
| 42(1) | 27(1) | 770.4  | 748.8  | 0.1 |
| 42(1) | 28(1) | 711.7  | 691.0  | 0.0 |
| 42(1) | 29(1) | 663.3  | 646.5  | 0.0 |
| 42(1) | 30(1) | 646.2  | 626.3  | 0.3 |
| 42(1) | 31(1) | 587.8  | 571.3  | 0.0 |
| 42(1) | 32(1) | 559.9  | 498.5  | 1.6 |
| 42(1) | 33(1) | 534.2  | 513.4  | 0.4 |
| 42(1) | 34(1) | 492.4  | 476.5  | 0.4 |
| 42(1) | 35(1) | 446.9  | 445.1  | 0.2 |
| 42(1) | 36(1) | 425.1  | 409.4  | 0.4 |
| 42(1) | 37(1) | 370.4  | 354.4  | 0.1 |
| 42(1) | 38(1) | 330.1  | 315.4  | 0.0 |
| 42(1) | 39(1) | 290.7  | 274.5  | 0.0 |
| 42(1) | 40(1) | 241.5  | 226.5  | 0.0 |
| 42(1) | 41(1) | 157.6  | 130.5  | 0.0 |

**Table S18.** Harmonic and anharmonic vibrational frequencies and their intensities of conformer **D1** as computed at the B3LYP/cc-pVTZ level of theory.

| Mode (quanta) | $\nu_{\text{harm}}$<br>( $\text{cm}^{-1}$ ) | $\nu_{\text{anharm}}$<br>( $\text{cm}^{-1}$ ) | $I_{\text{harm}}$<br>( $\text{km mol}^{-1}$ ) | $I_{\text{anharm}}$<br>( $\text{km mol}^{-1}$ ) |
|---------------|---------------------------------------------|-----------------------------------------------|-----------------------------------------------|-------------------------------------------------|
| 1(1)          | 3809.8                                      | 3626.8                                        | 91.6                                          | 77.4                                            |
| 2(1)          | 3753.4                                      | 3573.8                                        | 118.2                                         | 102.6                                           |
| 3(1)          | 3216.3                                      | 3089.9                                        | 0.4                                           | 1.2                                             |
| 4(1)          | 3207.1                                      | 3074.7                                        | 3.0                                           | 3.9                                             |
| 5(1)          | 3167.2                                      | 3030.1                                        | 8.7                                           | 11.0                                            |
| 6(1)          | 1812.9                                      | 1778.2                                        | 322.8                                         | 256.6                                           |
| 7(1)          | 1663.2                                      | 1619.1                                        | 295.5                                         | 139.9                                           |
| 8(1)          | 1626.2                                      | 1590.5                                        | 40.4                                          | 26.9                                            |
| 9(1)          | 1534.4                                      | 1499.6                                        | 20.7                                          | 16.1                                            |
| 10(1)         | 1486.6                                      | 1451.6                                        | 115.7                                         | 81.1                                            |
| 11(1)         | 1365.7                                      | 1333.0                                        | 93.0                                          | 34.0                                            |
| 12(1)         | 1361.5                                      | 1307.8                                        | 450.2                                         | 790.3                                           |
| 13(1)         | 1331.2                                      | 1298.8                                        | 131.6                                         | 246.6                                           |
| 14(1)         | 1272.5                                      | 1248.8                                        | 38.7                                          | 25.5                                            |
| 15(1)         | 1237.8                                      | 1213.2                                        | 18.4                                          | 9.5                                             |
| 16(1)         | 1205.1                                      | 1182.4                                        | 100.0                                         | 84.5                                            |
| 17(1)         | 1161.2                                      | 1139.6                                        | 32.0                                          | 10.4                                            |
| 18(1)         | 1143.8                                      | 1122.1                                        | 185.5                                         | 97.3                                            |
| 19(1)         | 1089.6                                      | 1060.9                                        | 12.8                                          | 0.0                                             |
| 20(1)         | 1000.8                                      | 983.0                                         | 1.5                                           | 0.7                                             |
| 21(1)         | 983.2                                       | 968.3                                         | 47.9                                          | 18.4                                            |
| 22(1)         | 872.2                                       | 872.4                                         | 37.0                                          | 40.8                                            |
| 23(1)         | 841.7                                       | 832.5                                         | 10.4                                          | 6.3                                             |
| 24(1)         | 774.8                                       | 772.8                                         | 20.1                                          | 14.7                                            |
| 25(1)         | 766.3                                       | 754.4                                         | 11.5                                          | 11.3                                            |
| 26(1)         | 750.5                                       | 739.4                                         | 2.7                                           | 2.3                                             |
| 27(1)         | 693.4                                       | 692.1                                         | 3.5                                           | 8.6                                             |
| 28(1)         | 642.3                                       | 632.5                                         | 21.0                                          | 10.3                                            |
| 29(1)         | 618.4                                       | 612.0                                         | 20.6                                          | 19.6                                            |
| 30(1)         | 591.1                                       | 585.5                                         | 2.3                                           | 2.3                                             |
| 31(1)         | 569.3                                       | 549.4                                         | 77.8                                          | 89.9                                            |
| 32(1)         | 526.6                                       | 521.7                                         | 11.5                                          | 9.5                                             |
| 33(1)         | 472.2                                       | 465.4                                         | 0.8                                           | 1.5                                             |
| 34(1)         | 415.9                                       | 412.6                                         | 1.1                                           | 1.2                                             |
| 35(1)         | 395.1                                       | 368.9                                         | 100.2                                         | 94.3                                            |
| 36(1)         | 364.0                                       | 361.8                                         | 4.7                                           | 2.2                                             |
| 37(1)         | 334.7                                       | 330.7                                         | 0.6                                           | 0.6                                             |

|       |        |        |      |      |
|-------|--------|--------|------|------|
| 38(1) | 294.7  | 294.7  | 1.8  | 1.6  |
| 39(1) | 228.3  | 224.9  | 1.7  | 1.6  |
| 40(1) | 220.9  | 218.3  | 14.2 | 13.4 |
| 41(1) | 100.6  | 100.8  | 3.0  | 2.9  |
| 42(1) | 64.3   | 65.0   | 4.6  | 4.6  |
| 1(2)  | 7619.7 | 7087.1 |      | 6.2  |
| 2(2)  | 7506.8 | 6969.8 |      | 2.2  |
| 3(2)  | 6432.6 | 6075.5 |      | 0.8  |
| 4(2)  | 6414.3 | 6059.0 |      | 0.5  |
| 5(2)  | 6334.3 | 5970.7 |      | 0.7  |
| 6(2)  | 3625.9 | 3538.2 |      | 4.9  |
| 7(2)  | 3326.5 | 3235.3 |      | 0.5  |
| 8(2)  | 3252.3 | 3175.4 |      | 1.1  |
| 9(2)  | 3068.8 | 2993.1 |      | 0.2  |
| 10(2) | 2973.1 | 2901.3 |      | 0.0  |
| 11(2) | 2731.4 | 2662.8 |      | 1.5  |
| 12(2) | 2723.0 | 2633.8 |      | 1.0  |
| 13(2) | 2662.4 | 2593.3 |      | 0.8  |
| 14(2) | 2544.9 | 2489.5 |      | 0.0  |
| 15(2) | 2475.6 | 2423.3 |      | 0.1  |
| 16(2) | 2410.3 | 2352.3 |      | 1.8  |
| 17(2) | 2322.5 | 2272.5 |      | 0.1  |
| 18(2) | 2287.6 | 2239.8 |      | 0.7  |
| 19(2) | 2179.3 | 2120.0 |      | 0.7  |
| 20(2) | 2001.6 | 1962.0 |      | 3.0  |
| 21(2) | 1966.4 | 1935.4 |      | 0.4  |
| 22(2) | 1744.4 | 1749.6 |      | 1.2  |
| 23(2) | 1683.5 | 1665.1 |      | 4.3  |
| 24(2) | 1549.6 | 1547.1 |      | 0.4  |
| 25(2) | 1532.6 | 1511.6 |      | 3.5  |
| 26(2) | 1500.9 | 1478.5 |      | 0.3  |
| 27(2) | 1386.8 | 1386.2 |      | 0.5  |
| 28(2) | 1284.5 | 1265.1 |      | 1.4  |
| 29(2) | 1236.9 | 1224.1 |      | 0.0  |
| 30(2) | 1182.3 | 1170.9 |      | 0.0  |
| 31(2) | 1138.6 | 1077.9 |      | 0.4  |
| 32(2) | 1053.3 | 1043.0 |      | 0.2  |
| 33(2) | 944.5  | 931.1  |      | 0.5  |
| 34(2) | 831.9  | 825.3  |      | 0.1  |
| 35(2) | 790.2  | 715.4  |      | 9.4  |



|       |      |        |        |     |
|-------|------|--------|--------|-----|
| 36(2) |      | 728.1  | 723.5  | 0.0 |
| 37(2) |      | 669.4  | 661.2  | 0.0 |
| 38(2) |      | 589.4  | 589.3  | 0.6 |
| 39(2) |      | 456.7  | 449.6  | 0.3 |
| 40(2) |      | 441.8  | 437.0  | 0.0 |
| 41(2) |      | 201.1  | 201.3  | 0.2 |
| 42(2) |      | 128.6  | 131.5  | 0.0 |
| 2(1)  | 1(1) | 7563.2 | 7200.6 | 0.0 |
| 3(1)  | 1(1) | 7026.1 | 6718.4 | 0.0 |
| 3(1)  | 2(1) | 6969.7 | 6665.5 | 0.0 |
| 4(1)  | 1(1) | 7017.0 | 6708.1 | 0.0 |
| 4(1)  | 2(1) | 6960.5 | 6655.0 | 0.0 |
| 4(1)  | 3(1) | 6423.5 | 6171.0 | 0.0 |
| 5(1)  | 1(1) | 6977.0 | 6665.4 | 0.0 |
| 5(1)  | 2(1) | 6920.6 | 6613.7 | 0.0 |
| 5(1)  | 3(1) | 6383.5 | 6131.4 | 0.0 |
| 5(1)  | 4(1) | 6374.3 | 6111.4 | 0.1 |
| 6(1)  | 1(1) | 5622.8 | 5405.0 | 0.0 |
| 6(1)  | 2(1) | 5566.3 | 5348.8 | 0.1 |
| 6(1)  | 3(1) | 5029.2 | 4869.9 | 0.0 |
| 6(1)  | 4(1) | 5020.1 | 4860.1 | 0.1 |
| 6(1)  | 5(1) | 4980.1 | 4818.1 | 0.0 |
| 7(1)  | 1(1) | 5473.1 | 5245.0 | 0.0 |
| 7(1)  | 2(1) | 5416.6 | 5193.1 | 0.0 |
| 7(1)  | 3(1) | 4879.5 | 4713.2 | 0.0 |
| 7(1)  | 4(1) | 4870.4 | 4702.3 | 0.0 |
| 7(1)  | 5(1) | 4830.4 | 4659.5 | 0.2 |
| 7(1)  | 6(1) | 3476.2 | 3396.7 | 0.1 |
| 8(1)  | 1(1) | 5436.0 | 5215.3 | 0.6 |
| 8(1)  | 2(1) | 5379.6 | 5164.1 | 0.0 |
| 8(1)  | 3(1) | 4842.5 | 4680.6 | 0.2 |
| 8(1)  | 4(1) | 4833.3 | 4672.4 | 0.2 |
| 8(1)  | 5(1) | 4793.3 | 4630.6 | 0.1 |
| 8(1)  | 6(1) | 3439.1 | 3367.9 | 0.0 |
| 8(1)  | 7(1) | 3289.4 | 3208.2 | 0.1 |
| 9(1)  | 1(1) | 5344.2 | 5125.5 | 0.0 |
| 9(1)  | 2(1) | 5287.8 | 5073.9 | 0.0 |
| 9(1)  | 3(1) | 4750.7 | 4592.0 | 0.1 |
| 9(1)  | 4(1) | 4741.5 | 4583.9 | 0.0 |
| 9(1)  | 5(1) | 4701.5 | 4540.9 | 0.1 |

|       |       |        |        |     |
|-------|-------|--------|--------|-----|
| 9(1)  | 6(1)  | 3347.3 | 3278.0 | 0.0 |
| 9(1)  | 7(1)  | 3197.6 | 3127.4 | 0.0 |
| 9(1)  | 8(1)  | 3160.6 | 3085.1 | 0.2 |
| 10(1) | 1(1)  | 5296.4 | 5078.0 | 0.6 |
| 10(1) | 2(1)  | 5240.0 | 5026.1 | 0.0 |
| 10(1) | 3(1)  | 4702.9 | 4549.9 | 0.1 |
| 10(1) | 4(1)  | 4693.7 | 4536.1 | 0.0 |
| 10(1) | 5(1)  | 4653.7 | 4495.2 | 0.0 |
| 10(1) | 6(1)  | 3299.5 | 3230.7 | 0.1 |
| 10(1) | 7(1)  | 3149.8 | 3061.1 | 0.1 |
| 10(1) | 8(1)  | 3112.7 | 3038.8 | 0.3 |
| 10(1) | 9(1)  | 3020.9 | 2948.3 | 0.0 |
| 11(1) | 1(1)  | 5175.5 | 4957.8 | 0.2 |
| 11(1) | 2(1)  | 5119.1 | 4908.0 | 0.4 |
| 11(1) | 3(1)  | 4582.0 | 4425.3 | 0.0 |
| 11(1) | 4(1)  | 4572.8 | 4416.7 | 0.0 |
| 11(1) | 5(1)  | 4532.8 | 4374.5 | 0.0 |
| 11(1) | 6(1)  | 3178.6 | 3109.5 | 0.1 |
| 11(1) | 7(1)  | 3028.9 | 2945.4 | 0.0 |
| 11(1) | 8(1)  | 2991.9 | 2917.9 | 0.2 |
| 11(1) | 9(1)  | 2900.1 | 2829.2 | 0.6 |
| 11(1) | 10(1) | 2852.2 | 2782.8 | 1.0 |
| 12(1) | 1(1)  | 5171.3 | 4947.6 | 0.1 |
| 12(1) | 2(1)  | 5114.9 | 4898.6 | 0.8 |
| 12(1) | 3(1)  | 4577.8 | 4413.2 | 0.0 |
| 12(1) | 4(1)  | 4568.6 | 4402.4 | 0.0 |
| 12(1) | 5(1)  | 4528.6 | 4363.2 | 0.0 |
| 12(1) | 6(1)  | 3174.4 | 3096.9 | 0.1 |
| 12(1) | 7(1)  | 3024.7 | 2936.2 | 0.4 |
| 12(1) | 8(1)  | 2987.7 | 2908.9 | 0.1 |
| 12(1) | 9(1)  | 2895.9 | 2818.6 | 0.3 |
| 12(1) | 10(1) | 2848.0 | 2772.1 | 0.3 |
| 12(1) | 11(1) | 2727.2 | 2645.8 | 0.1 |
| 13(1) | 1(1)  | 5141.0 | 4926.3 | 0.6 |
| 13(1) | 2(1)  | 5084.6 | 4872.5 | 0.1 |
| 13(1) | 3(1)  | 4547.5 | 4389.8 | 0.2 |
| 13(1) | 4(1)  | 4538.3 | 4377.2 | 0.1 |
| 13(1) | 5(1)  | 4498.4 | 4337.9 | 0.1 |
| 13(1) | 6(1)  | 3144.1 | 3076.4 | 0.0 |
| 13(1) | 7(1)  | 2994.4 | 2912.6 | 0.1 |

|       |       |        |        |     |
|-------|-------|--------|--------|-----|
| 13(1) | 8(1)  | 2957.4 | 2887.3 | 0.1 |
| 13(1) | 9(1)  | 2865.6 | 2793.9 | 0.8 |
| 13(1) | 10(1) | 2817.8 | 2748.0 | 0.0 |
| 13(1) | 11(1) | 2696.9 | 2629.0 | 0.0 |
| 13(1) | 12(1) | 2692.7 | 2617.3 | 0.4 |
| 14(1) | 1(1)  | 5082.3 | 4870.3 | 0.1 |
| 14(1) | 2(1)  | 5025.9 | 4817.6 | 0.5 |
| 14(1) | 3(1)  | 4488.8 | 4335.4 | 0.1 |
| 14(1) | 4(1)  | 4479.6 | 4324.0 | 0.1 |
| 14(1) | 5(1)  | 4439.6 | 4285.5 | 0.0 |
| 14(1) | 6(1)  | 3085.4 | 3022.6 | 0.0 |
| 14(1) | 7(1)  | 2935.7 | 2861.1 | 0.3 |
| 14(1) | 8(1)  | 2898.6 | 2834.4 | 0.0 |
| 14(1) | 9(1)  | 2806.9 | 2742.5 | 0.1 |
| 14(1) | 10(1) | 2759.0 | 2695.8 | 0.1 |
| 14(1) | 11(1) | 2638.2 | 2576.2 | 0.7 |
| 14(1) | 12(1) | 2634.0 | 2563.6 | 0.2 |
| 14(1) | 13(1) | 2603.7 | 2541.6 | 0.8 |
| 15(1) | 1(1)  | 5047.6 | 4839.3 | 0.0 |
| 15(1) | 2(1)  | 4991.2 | 4783.9 | 0.8 |
| 15(1) | 3(1)  | 4454.1 | 4302.2 | 0.1 |
| 15(1) | 4(1)  | 4444.9 | 4288.4 | 0.1 |
| 15(1) | 5(1)  | 4404.9 | 4251.5 | 0.0 |
| 15(1) | 6(1)  | 3050.7 | 2986.2 | 0.1 |
| 15(1) | 7(1)  | 2901.0 | 2829.3 | 0.1 |
| 15(1) | 8(1)  | 2864.0 | 2802.3 | 0.0 |
| 15(1) | 9(1)  | 2772.2 | 2710.5 | 0.3 |
| 15(1) | 10(1) | 2724.3 | 2664.3 | 0.0 |
| 15(1) | 11(1) | 2603.5 | 2541.5 | 0.5 |
| 15(1) | 12(1) | 2599.3 | 2527.6 | 1.1 |
| 15(1) | 13(1) | 2569.0 | 2510.0 | 0.1 |
| 15(1) | 14(1) | 2510.3 | 2456.1 | 0.4 |
| 16(1) | 1(1)  | 5015.0 | 4798.3 | 0.9 |
| 16(1) | 2(1)  | 4958.5 | 4751.2 | 0.1 |
| 16(1) | 3(1)  | 4421.5 | 4270.9 | 0.0 |
| 16(1) | 4(1)  | 4412.3 | 4259.4 | 0.0 |
| 16(1) | 5(1)  | 4372.3 | 4216.8 | 0.0 |
| 16(1) | 6(1)  | 3018.1 | 2957.0 | 0.0 |
| 16(1) | 7(1)  | 2868.4 | 2796.4 | 0.1 |
| 16(1) | 8(1)  | 2831.3 | 2764.9 | 0.1 |

|       |       |        |        |     |
|-------|-------|--------|--------|-----|
| 16(1) | 9(1)  | 2739.5 | 2676.2 | 0.1 |
| 16(1) | 10(1) | 2691.7 | 2628.5 | 0.0 |
| 16(1) | 11(1) | 2570.8 | 2508.3 | 0.2 |
| 16(1) | 12(1) | 2566.6 | 2499.0 | 0.8 |
| 16(1) | 13(1) | 2536.4 | 2473.8 | 0.3 |
| 16(1) | 14(1) | 2477.6 | 2422.9 | 1.1 |
| 16(1) | 15(1) | 2442.9 | 2390.9 | 0.7 |
| 17(1) | 1(1)  | 4971.1 | 4763.7 | 0.0 |
| 17(1) | 2(1)  | 4914.6 | 4709.0 | 0.2 |
| 17(1) | 3(1)  | 4377.5 | 4221.4 | 0.1 |
| 17(1) | 4(1)  | 4368.4 | 4213.5 | 0.1 |
| 17(1) | 5(1)  | 4328.4 | 4174.5 | 0.0 |
| 17(1) | 6(1)  | 2974.2 | 2914.6 | 0.0 |
| 17(1) | 7(1)  | 2824.5 | 2752.2 | 0.2 |
| 17(1) | 8(1)  | 2787.4 | 2725.7 | 0.1 |
| 17(1) | 9(1)  | 2695.6 | 2634.4 | 0.4 |
| 17(1) | 10(1) | 2647.8 | 2585.9 | 0.1 |
| 17(1) | 11(1) | 2526.9 | 2468.4 | 0.0 |
| 17(1) | 12(1) | 2522.7 | 2457.0 | 0.3 |
| 17(1) | 13(1) | 2492.4 | 2432.6 | 0.7 |
| 17(1) | 14(1) | 2433.7 | 2380.8 | 0.4 |
| 17(1) | 15(1) | 2399.0 | 2348.8 | 0.5 |
| 17(1) | 16(1) | 2366.4 | 2313.9 | 0.1 |
| 18(1) | 1(1)  | 4953.6 | 4746.7 | 0.3 |
| 18(1) | 2(1)  | 4897.2 | 4693.9 | 0.2 |
| 18(1) | 3(1)  | 4360.1 | 4209.3 | 0.0 |
| 18(1) | 4(1)  | 4350.9 | 4200.5 | 0.0 |
| 18(1) | 5(1)  | 4311.0 | 4155.6 | 0.0 |
| 18(1) | 6(1)  | 2956.7 | 2897.4 | 0.1 |
| 18(1) | 7(1)  | 2807.0 | 2733.7 | 0.4 |
| 18(1) | 8(1)  | 2770.0 | 2708.4 | 0.0 |
| 18(1) | 9(1)  | 2678.2 | 2617.9 | 0.1 |
| 18(1) | 10(1) | 2630.4 | 2571.8 | 0.5 |
| 18(1) | 11(1) | 2509.5 | 2451.4 | 0.4 |
| 18(1) | 12(1) | 2505.3 | 2437.6 | 0.5 |
| 18(1) | 13(1) | 2475.0 | 2417.2 | 0.3 |
| 18(1) | 14(1) | 2416.3 | 2365.0 | 0.9 |
| 18(1) | 15(1) | 2381.6 | 2331.8 | 0.1 |
| 18(1) | 16(1) | 2349.0 | 2297.4 | 0.1 |
| 18(1) | 17(1) | 2305.0 | 2257.1 | 0.0 |

|       |       |        |        |     |
|-------|-------|--------|--------|-----|
| 19(1) | 1(1)  | 4899.5 | 4687.5 | 0.0 |
| 19(1) | 2(1)  | 4843.0 | 4632.6 | 0.2 |
| 19(1) | 3(1)  | 4305.9 | 4151.6 | 0.2 |
| 19(1) | 4(1)  | 4296.8 | 4141.7 | 0.1 |
| 19(1) | 5(1)  | 4256.8 | 4100.3 | 0.1 |
| 19(1) | 6(1)  | 2902.6 | 2837.6 | 0.2 |
| 19(1) | 7(1)  | 2752.9 | 2677.6 | 0.1 |
| 19(1) | 8(1)  | 2715.8 | 2651.1 | 0.0 |
| 19(1) | 9(1)  | 2624.0 | 2559.6 | 0.1 |
| 19(1) | 10(1) | 2576.2 | 2512.0 | 0.4 |
| 19(1) | 11(1) | 2455.3 | 2391.8 | 0.6 |
| 19(1) | 12(1) | 2451.1 | 2379.5 | 1.0 |
| 19(1) | 13(1) | 2420.8 | 2358.3 | 0.5 |
| 19(1) | 14(1) | 2362.1 | 2305.6 | 0.4 |
| 19(1) | 15(1) | 2327.4 | 2271.0 | 0.3 |
| 19(1) | 16(1) | 2294.8 | 2238.7 | 0.1 |
| 19(1) | 17(1) | 2250.9 | 2196.7 | 0.1 |
| 19(1) | 18(1) | 2233.4 | 2179.0 | 0.2 |
| 20(1) | 1(1)  | 4810.6 | 4609.5 | 0.0 |
| 20(1) | 2(1)  | 4754.2 | 4556.9 | 0.0 |
| 20(1) | 3(1)  | 4217.1 | 4074.3 | 0.0 |
| 20(1) | 4(1)  | 4207.9 | 4050.5 | 0.1 |
| 20(1) | 5(1)  | 4167.9 | 4018.2 | 0.0 |
| 20(1) | 6(1)  | 2813.7 | 2761.3 | 0.0 |
| 20(1) | 7(1)  | 2664.0 | 2600.4 | 0.0 |
| 20(1) | 8(1)  | 2627.0 | 2572.3 | 0.0 |
| 20(1) | 9(1)  | 2535.2 | 2482.3 | 0.0 |
| 20(1) | 10(1) | 2487.3 | 2436.4 | 0.0 |
| 20(1) | 11(1) | 2366.5 | 2315.1 | 0.0 |
| 20(1) | 12(1) | 2362.3 | 2303.6 | 0.0 |
| 20(1) | 13(1) | 2332.0 | 2282.1 | 0.0 |
| 20(1) | 14(1) | 2273.3 | 2227.7 | 0.0 |
| 20(1) | 15(1) | 2238.6 | 2195.1 | 0.0 |
| 20(1) | 16(1) | 2205.9 | 2162.0 | 0.0 |
| 20(1) | 17(1) | 2162.0 | 2119.6 | 0.0 |
| 20(1) | 18(1) | 2144.6 | 2102.6 | 0.0 |
| 20(1) | 19(1) | 2090.4 | 2043.3 | 0.0 |
| 21(1) | 1(1)  | 4793.0 | 4595.1 | 0.0 |
| 21(1) | 2(1)  | 4736.6 | 4541.4 | 0.0 |
| 21(1) | 3(1)  | 4199.5 | 4057.8 | 0.0 |

|       |       |        |        |     |
|-------|-------|--------|--------|-----|
| 21(1) | 4(1)  | 4190.3 | 4048.0 | 0.0 |
| 21(1) | 5(1)  | 4150.4 | 4006.9 | 0.3 |
| 21(1) | 6(1)  | 2796.1 | 2746.3 | 0.0 |
| 21(1) | 7(1)  | 2646.4 | 2585.2 | 0.1 |
| 21(1) | 8(1)  | 2609.4 | 2554.8 | 0.0 |
| 21(1) | 9(1)  | 2517.6 | 2466.2 | 0.6 |
| 21(1) | 10(1) | 2469.8 | 2419.2 | 0.1 |
| 21(1) | 11(1) | 2348.9 | 2300.8 | 0.2 |
| 21(1) | 12(1) | 2344.7 | 2289.6 | 0.1 |
| 21(1) | 13(1) | 2314.4 | 2264.9 | 0.9 |
| 21(1) | 14(1) | 2255.7 | 2213.3 | 0.3 |
| 21(1) | 15(1) | 2221.0 | 2180.6 | 0.0 |
| 21(1) | 16(1) | 2188.4 | 2145.9 | 0.1 |
| 21(1) | 17(1) | 2144.4 | 2104.2 | 0.2 |
| 21(1) | 18(1) | 2127.0 | 2088.3 | 0.2 |
| 21(1) | 19(1) | 2072.8 | 2028.4 | 0.4 |
| 21(1) | 20(1) | 1984.0 | 1951.3 | 0.0 |
| 22(1) | 1(1)  | 4682.0 | 4498.9 | 0.0 |
| 22(1) | 2(1)  | 4625.6 | 4445.8 | 0.0 |
| 22(1) | 3(1)  | 4088.5 | 3949.5 | 0.0 |
| 22(1) | 4(1)  | 4079.3 | 3953.5 | 0.0 |
| 22(1) | 5(1)  | 4039.3 | 3911.7 | 0.0 |
| 22(1) | 6(1)  | 2685.1 | 2650.6 | 0.0 |
| 22(1) | 7(1)  | 2535.4 | 2489.3 | 0.0 |
| 22(1) | 8(1)  | 2498.4 | 2460.8 | 0.0 |
| 22(1) | 9(1)  | 2406.6 | 2373.7 | 0.0 |
| 22(1) | 10(1) | 2358.7 | 2322.6 | 0.0 |
| 22(1) | 11(1) | 2237.9 | 2205.5 | 0.0 |
| 22(1) | 12(1) | 2233.7 | 2193.6 | 0.0 |
| 22(1) | 13(1) | 2203.4 | 2170.4 | 0.0 |
| 22(1) | 14(1) | 2144.7 | 2118.8 | 0.0 |
| 22(1) | 15(1) | 2110.0 | 2085.0 | 0.0 |
| 22(1) | 16(1) | 2077.3 | 2049.7 | 0.0 |
| 22(1) | 17(1) | 2033.4 | 2008.8 | 0.0 |
| 22(1) | 18(1) | 2016.0 | 1992.7 | 0.0 |
| 22(1) | 19(1) | 1961.8 | 1932.7 | 0.0 |
| 22(1) | 20(1) | 1873.0 | 1857.8 | 0.4 |
| 22(1) | 21(1) | 1855.4 | 1840.2 | 0.0 |
| 23(1) | 1(1)  | 4651.6 | 4458.4 | 0.0 |
| 23(1) | 2(1)  | 4595.1 | 4406.5 | 0.0 |

|       |       |        |        |     |
|-------|-------|--------|--------|-----|
| 23(1) | 3(1)  | 4058.0 | 3923.7 | 0.0 |
| 23(1) | 4(1)  | 4048.9 | 3911.9 | 0.0 |
| 23(1) | 5(1)  | 4008.9 | 3862.3 | 0.0 |
| 23(1) | 6(1)  | 2654.7 | 2610.1 | 0.0 |
| 23(1) | 7(1)  | 2505.0 | 2449.0 | 0.0 |
| 23(1) | 8(1)  | 2467.9 | 2421.7 | 0.0 |
| 23(1) | 9(1)  | 2376.1 | 2331.3 | 0.0 |
| 23(1) | 10(1) | 2328.3 | 2284.9 | 0.0 |
| 23(1) | 11(1) | 2207.4 | 2164.6 | 0.0 |
| 23(1) | 12(1) | 2203.2 | 2152.7 | 0.0 |
| 23(1) | 13(1) | 2172.9 | 2132.6 | 0.0 |
| 23(1) | 14(1) | 2114.2 | 2078.1 | 0.0 |
| 23(1) | 15(1) | 2079.5 | 2044.5 | 0.0 |
| 23(1) | 16(1) | 2046.9 | 2009.0 | 0.0 |
| 23(1) | 17(1) | 2003.0 | 1969.3 | 0.0 |
| 23(1) | 18(1) | 1985.5 | 1953.5 | 0.0 |
| 23(1) | 19(1) | 1931.4 | 1892.9 | 0.0 |
| 23(1) | 20(1) | 1842.5 | 1814.5 | 1.2 |
| 23(1) | 21(1) | 1824.9 | 1800.2 | 0.0 |
| 23(1) | 22(1) | 1713.9 | 1706.5 | 1.1 |
| 24(1) | 1(1)  | 4584.6 | 4399.4 | 0.0 |
| 24(1) | 2(1)  | 4528.2 | 4346.6 | 0.0 |
| 24(1) | 3(1)  | 3991.1 | 3863.7 | 0.0 |
| 24(1) | 4(1)  | 3981.9 | 3852.7 | 0.0 |
| 24(1) | 5(1)  | 3942.0 | 3810.8 | 0.0 |
| 24(1) | 6(1)  | 2587.7 | 2548.9 | 0.0 |
| 24(1) | 7(1)  | 2438.0 | 2391.1 | 0.0 |
| 24(1) | 8(1)  | 2401.0 | 2362.3 | 0.0 |
| 24(1) | 9(1)  | 2309.2 | 2272.2 | 0.0 |
| 24(1) | 10(1) | 2261.4 | 2225.9 | 0.0 |
| 24(1) | 11(1) | 2140.5 | 2108.0 | 0.0 |
| 24(1) | 12(1) | 2136.3 | 2092.6 | 0.0 |
| 24(1) | 13(1) | 2106.0 | 2070.3 | 0.0 |
| 24(1) | 14(1) | 2047.3 | 2018.2 | 0.0 |
| 24(1) | 15(1) | 2012.6 | 1981.6 | 0.0 |
| 24(1) | 16(1) | 1980.0 | 1953.0 | 0.0 |
| 24(1) | 17(1) | 1936.0 | 1909.3 | 0.0 |
| 24(1) | 18(1) | 1918.6 | 1892.5 | 0.0 |
| 24(1) | 19(1) | 1864.4 | 1832.8 | 0.0 |
| 24(1) | 20(1) | 1775.6 | 1756.0 | 0.9 |

|       |       |        |        |     |
|-------|-------|--------|--------|-----|
| 24(1) | 21(1) | 1758.0 | 1740.9 | 0.0 |
| 24(1) | 22(1) | 1647.0 | 1647.4 | 0.3 |
| 24(1) | 23(1) | 1616.5 | 1606.4 | 2.7 |
| 25(1) | 1(1)  | 4576.2 | 4383.0 | 0.0 |
| 25(1) | 2(1)  | 4519.7 | 4327.9 | 0.5 |
| 25(1) | 3(1)  | 3982.6 | 3847.5 | 0.1 |
| 25(1) | 4(1)  | 3973.5 | 3837.5 | 0.0 |
| 25(1) | 5(1)  | 3933.5 | 3796.0 | 0.0 |
| 25(1) | 6(1)  | 2579.3 | 2530.6 | 0.1 |
| 25(1) | 7(1)  | 2429.6 | 2374.6 | 0.2 |
| 25(1) | 8(1)  | 2392.5 | 2346.0 | 0.0 |
| 25(1) | 9(1)  | 2300.7 | 2256.0 | 0.2 |
| 25(1) | 10(1) | 2252.9 | 2208.8 | 0.1 |
| 25(1) | 11(1) | 2132.0 | 2088.0 | 0.5 |
| 25(1) | 12(1) | 2127.8 | 2074.5 | 0.6 |
| 25(1) | 13(1) | 2097.5 | 2054.6 | 0.1 |
| 25(1) | 14(1) | 2038.8 | 2001.8 | 0.4 |
| 25(1) | 15(1) | 2004.1 | 1968.3 | 1.7 |
| 25(1) | 16(1) | 1971.5 | 1935.3 | 0.5 |
| 25(1) | 17(1) | 1927.5 | 1893.3 | 1.2 |
| 25(1) | 18(1) | 1910.1 | 1875.7 | 0.9 |
| 25(1) | 19(1) | 1855.9 | 1814.9 | 0.3 |
| 25(1) | 20(1) | 1767.1 | 1739.0 | 0.0 |
| 25(1) | 21(1) | 1749.5 | 1724.2 | 0.1 |
| 25(1) | 22(1) | 1638.5 | 1628.6 | 0.0 |
| 25(1) | 23(1) | 1608.1 | 1588.3 | 0.0 |
| 25(1) | 24(1) | 1541.1 | 1528.4 | 0.0 |
| 26(1) | 1(1)  | 4560.3 | 4366.3 | 0.0 |
| 26(1) | 2(1)  | 4503.9 | 4313.0 | 0.0 |
| 26(1) | 3(1)  | 3966.8 | 3831.2 | 0.0 |
| 26(1) | 4(1)  | 3957.6 | 3819.9 | 0.2 |
| 26(1) | 5(1)  | 3917.6 | 3779.5 | 0.1 |
| 26(1) | 6(1)  | 2563.4 | 2517.5 | 0.0 |
| 26(1) | 7(1)  | 2413.7 | 2357.1 | 0.8 |
| 26(1) | 8(1)  | 2376.6 | 2328.6 | 0.4 |
| 26(1) | 9(1)  | 2284.8 | 2237.9 | 0.1 |
| 26(1) | 10(1) | 2237.0 | 2191.3 | 0.1 |
| 26(1) | 11(1) | 2116.1 | 2069.4 | 0.1 |
| 26(1) | 12(1) | 2111.9 | 2060.0 | 0.1 |
| 26(1) | 13(1) | 2081.7 | 2036.6 | 0.7 |



|       |       |        |        |     |
|-------|-------|--------|--------|-----|
| 26(1) | 14(1) | 2022.9 | 1983.6 | 0.2 |
| 26(1) | 15(1) | 1988.2 | 1951.5 | 0.0 |
| 26(1) | 16(1) | 1955.6 | 1918.1 | 0.1 |
| 26(1) | 17(1) | 1911.7 | 1875.8 | 0.4 |
| 26(1) | 18(1) | 1894.3 | 1859.3 | 0.2 |
| 26(1) | 19(1) | 1840.1 | 1799.9 | 1.0 |
| 26(1) | 20(1) | 1751.2 | 1722.0 | 0.0 |
| 26(1) | 21(1) | 1733.7 | 1707.4 | 0.2 |
| 26(1) | 22(1) | 1622.6 | 1611.8 | 0.0 |
| 26(1) | 23(1) | 1592.2 | 1571.4 | 0.0 |
| 26(1) | 24(1) | 1525.3 | 1511.9 | 0.0 |
| 26(1) | 25(1) | 1516.8 | 1495.4 | 0.2 |
| 27(1) | 1(1)  | 4503.3 | 4318.7 | 0.0 |
| 27(1) | 2(1)  | 4446.8 | 4265.5 | 0.0 |
| 27(1) | 3(1)  | 3909.7 | 3781.8 | 0.0 |
| 27(1) | 4(1)  | 3900.6 | 3773.0 | 0.0 |
| 27(1) | 5(1)  | 3860.6 | 3730.7 | 0.0 |
| 27(1) | 6(1)  | 2506.4 | 2469.2 | 0.0 |
| 27(1) | 7(1)  | 2356.7 | 2309.5 | 0.0 |
| 27(1) | 8(1)  | 2319.6 | 2280.9 | 0.0 |
| 27(1) | 9(1)  | 2227.8 | 2191.1 | 0.0 |
| 27(1) | 10(1) | 2180.0 | 2144.7 | 0.0 |
| 27(1) | 11(1) | 2059.1 | 2023.5 | 0.0 |
| 27(1) | 12(1) | 2054.9 | 2012.4 | 0.0 |
| 27(1) | 13(1) | 2024.6 | 1990.1 | 0.0 |
| 27(1) | 14(1) | 1965.9 | 1937.7 | 0.0 |
| 27(1) | 15(1) | 1931.2 | 1903.5 | 0.0 |
| 27(1) | 16(1) | 1898.6 | 1871.2 | 0.0 |
| 27(1) | 17(1) | 1854.6 | 1828.4 | 0.0 |
| 27(1) | 18(1) | 1837.2 | 1810.5 | 0.0 |
| 27(1) | 19(1) | 1783.0 | 1753.1 | 0.0 |
| 27(1) | 20(1) | 1694.2 | 1676.7 | 0.2 |
| 27(1) | 21(1) | 1676.6 | 1659.0 | 0.0 |
| 27(1) | 22(1) | 1565.6 | 1567.3 | 0.6 |
| 27(1) | 23(1) | 1535.2 | 1525.3 | 0.3 |
| 27(1) | 24(1) | 1468.2 | 1467.2 | 6.1 |
| 27(1) | 25(1) | 1459.7 | 1448.1 | 0.0 |
| 27(1) | 26(1) | 1443.9 | 1431.0 | 0.0 |
| 28(1) | 1(1)  | 4452.1 | 4259.3 | 0.0 |
| 28(1) | 2(1)  | 4395.7 | 4206.3 | 0.1 |

|       |       |        |        |      |
|-------|-------|--------|--------|------|
| 28(1) | 3(1)  | 3858.6 | 3723.7 | 0.0  |
| 28(1) | 4(1)  | 3849.4 | 3713.7 | 0.0  |
| 28(1) | 5(1)  | 3809.4 | 3671.2 | 0.0  |
| 28(1) | 6(1)  | 2455.2 | 2410.4 | 0.0  |
| 28(1) | 7(1)  | 2305.5 | 2250.8 | 0.0  |
| 28(1) | 8(1)  | 2268.4 | 2221.3 | 0.0  |
| 28(1) | 9(1)  | 2176.7 | 2133.8 | 0.0  |
| 28(1) | 10(1) | 2128.8 | 2083.0 | 0.0  |
| 28(1) | 11(1) | 2008.0 | 1964.0 | 0.0  |
| 28(1) | 12(1) | 2003.8 | 1953.2 | 0.0  |
| 28(1) | 13(1) | 1973.5 | 1930.0 | 0.0  |
| 28(1) | 14(1) | 1914.7 | 1878.7 | 0.0  |
| 28(1) | 15(1) | 1880.1 | 1847.2 | 0.0  |
| 28(1) | 16(1) | 1847.4 | 1812.1 | 0.0  |
| 28(1) | 17(1) | 1803.5 | 1767.9 | 0.0  |
| 28(1) | 18(1) | 1786.1 | 1753.0 | 0.0  |
| 28(1) | 19(1) | 1731.9 | 1692.1 | 0.0  |
| 28(1) | 20(1) | 1643.1 | 1615.3 | 9.6  |
| 28(1) | 21(1) | 1625.5 | 1599.8 | 0.0  |
| 28(1) | 22(1) | 1514.5 | 1505.8 | 1.0  |
| 28(1) | 23(1) | 1484.0 | 1466.6 | 0.9  |
| 28(1) | 24(1) | 1417.1 | 1407.2 | 3.3  |
| 28(1) | 25(1) | 1408.6 | 1388.5 | 0.0  |
| 28(1) | 26(1) | 1392.7 | 1371.7 | 0.0  |
| 28(1) | 27(1) | 1335.7 | 1325.7 | 12.3 |
| 29(1) | 1(1)  | 4428.3 | 4238.6 | 0.0  |
| 29(1) | 2(1)  | 4371.8 | 4185.3 | 0.1  |
| 29(1) | 3(1)  | 3834.7 | 3703.3 | 0.1  |
| 29(1) | 4(1)  | 3825.6 | 3693.3 | 0.0  |
| 29(1) | 5(1)  | 3785.6 | 3651.8 | 0.0  |
| 29(1) | 6(1)  | 2431.4 | 2388.0 | 0.0  |
| 29(1) | 7(1)  | 2281.7 | 2229.9 | 0.0  |
| 29(1) | 8(1)  | 2244.6 | 2201.4 | 0.0  |
| 29(1) | 9(1)  | 2152.8 | 2110.7 | 0.0  |
| 29(1) | 10(1) | 2105.0 | 2064.6 | 0.0  |
| 29(1) | 11(1) | 1984.1 | 1942.8 | 0.0  |
| 29(1) | 12(1) | 1979.9 | 1931.4 | 0.0  |
| 29(1) | 13(1) | 1949.6 | 1909.9 | 0.0  |
| 29(1) | 14(1) | 1890.9 | 1857.7 | 0.1  |
| 29(1) | 15(1) | 1856.2 | 1824.2 | 0.0  |

|       |       |        |        |      |
|-------|-------|--------|--------|------|
| 29(1) | 16(1) | 1823.6 | 1790.9 | 0.7  |
| 29(1) | 17(1) | 1779.7 | 1749.0 | 0.9  |
| 29(1) | 18(1) | 1762.2 | 1731.7 | 0.3  |
| 29(1) | 19(1) | 1708.1 | 1672.2 | 0.2  |
| 29(1) | 20(1) | 1619.2 | 1594.8 | 0.0  |
| 29(1) | 21(1) | 1601.6 | 1581.1 | 0.0  |
| 29(1) | 22(1) | 1490.6 | 1484.6 | 0.0  |
| 29(1) | 23(1) | 1460.2 | 1444.4 | 0.0  |
| 29(1) | 24(1) | 1393.2 | 1384.9 | 0.0  |
| 29(1) | 25(1) | 1384.8 | 1369.9 | 40.8 |
| 29(1) | 26(1) | 1368.9 | 1353.5 | 47.4 |
| 29(1) | 27(1) | 1311.9 | 1304.5 | 0.0  |
| 29(1) | 28(1) | 1260.7 | 1244.3 | 0.0  |
| 30(1) | 1(1)  | 4401.0 | 4212.5 | 0.0  |
| 30(1) | 2(1)  | 4344.5 | 4158.5 | 0.4  |
| 30(1) | 3(1)  | 3807.4 | 3677.1 | 0.0  |
| 30(1) | 4(1)  | 3798.3 | 3666.9 | 0.0  |
| 30(1) | 5(1)  | 3758.3 | 3625.3 | 0.0  |
| 30(1) | 6(1)  | 2404.1 | 2361.8 | 0.0  |
| 30(1) | 7(1)  | 2254.4 | 2203.2 | 0.0  |
| 30(1) | 8(1)  | 2217.3 | 2175.0 | 0.0  |
| 30(1) | 9(1)  | 2125.5 | 2084.0 | 0.1  |
| 30(1) | 10(1) | 2077.7 | 2038.0 | 0.0  |
| 30(1) | 11(1) | 1956.8 | 1917.7 | 0.1  |
| 30(1) | 12(1) | 1952.6 | 1906.1 | 0.4  |
| 30(1) | 13(1) | 1922.3 | 1883.5 | 0.1  |
| 30(1) | 14(1) | 1863.6 | 1831.3 | 1.1  |
| 30(1) | 15(1) | 1828.9 | 1799.5 | 35.2 |
| 30(1) | 16(1) | 1796.3 | 1764.4 | 1.2  |
| 30(1) | 17(1) | 1752.4 | 1722.3 | 0.5  |
| 30(1) | 18(1) | 1734.9 | 1706.1 | 0.7  |
| 30(1) | 19(1) | 1680.8 | 1645.9 | 3.4  |
| 30(1) | 20(1) | 1591.9 | 1568.3 | 0.0  |
| 30(1) | 21(1) | 1574.3 | 1553.2 | 0.9  |
| 30(1) | 22(1) | 1463.3 | 1458.0 | 0.0  |
| 30(1) | 23(1) | 1432.9 | 1417.8 | 0.0  |
| 30(1) | 24(1) | 1365.9 | 1358.2 | 0.0  |
| 30(1) | 25(1) | 1357.5 | 1342.7 | 0.1  |
| 30(1) | 26(1) | 1341.6 | 1324.7 | 5.4  |
| 30(1) | 27(1) | 1284.6 | 1277.5 | 0.0  |

|       |       |        |        |      |
|-------|-------|--------|--------|------|
| 30(1) | 28(1) | 1233.4 | 1217.8 | 0.0  |
| 30(1) | 29(1) | 1209.6 | 1197.5 | 0.7  |
| 31(1) | 1(1)  | 4379.1 | 4176.1 | 0.0  |
| 31(1) | 2(1)  | 4322.7 | 4128.9 | 0.7  |
| 31(1) | 3(1)  | 3785.6 | 3640.8 | 0.0  |
| 31(1) | 4(1)  | 3776.4 | 3630.8 | 0.0  |
| 31(1) | 5(1)  | 3736.4 | 3589.2 | 0.0  |
| 31(1) | 6(1)  | 2382.2 | 2327.5 | 0.0  |
| 31(1) | 7(1)  | 2232.5 | 2167.9 | 0.0  |
| 31(1) | 8(1)  | 2195.5 | 2139.7 | 0.0  |
| 31(1) | 9(1)  | 2103.7 | 2049.2 | 0.0  |
| 31(1) | 10(1) | 2055.8 | 2002.8 | 0.0  |
| 31(1) | 11(1) | 1935.0 | 1883.8 | 0.1  |
| 31(1) | 12(1) | 1930.8 | 1865.4 | 0.2  |
| 31(1) | 13(1) | 1900.5 | 1846.3 | 0.0  |
| 31(1) | 14(1) | 1841.7 | 1799.2 | 0.0  |
| 31(1) | 15(1) | 1807.1 | 1768.5 | 0.0  |
| 31(1) | 16(1) | 1774.4 | 1733.7 | 0.0  |
| 31(1) | 17(1) | 1730.5 | 1685.8 | 0.0  |
| 31(1) | 18(1) | 1713.1 | 1667.9 | 0.0  |
| 31(1) | 19(1) | 1658.9 | 1595.7 | 0.0  |
| 31(1) | 20(1) | 1570.1 | 1532.6 | 0.2  |
| 31(1) | 21(1) | 1552.5 | 1517.9 | 0.0  |
| 31(1) | 22(1) | 1441.5 | 1424.4 | 0.4  |
| 31(1) | 23(1) | 1411.0 | 1384.3 | 12.5 |
| 31(1) | 24(1) | 1344.1 | 1335.6 | 7.0  |
| 31(1) | 25(1) | 1335.6 | 1305.5 | 0.0  |
| 31(1) | 26(1) | 1319.7 | 1289.0 | 0.0  |
| 31(1) | 27(1) | 1262.7 | 1240.8 | 2.0  |
| 31(1) | 28(1) | 1211.6 | 1172.3 | 0.1  |
| 31(1) | 29(1) | 1187.7 | 1161.3 | 0.0  |
| 31(1) | 30(1) | 1160.4 | 1134.3 | 0.0  |
| 32(1) | 1(1)  | 4336.5 | 4148.4 | 0.0  |
| 32(1) | 2(1)  | 4280.0 | 4095.1 | 0.1  |
| 32(1) | 3(1)  | 3742.9 | 3613.4 | 0.0  |
| 32(1) | 4(1)  | 3733.8 | 3603.0 | 0.0  |
| 32(1) | 5(1)  | 3693.8 | 3561.4 | 0.0  |
| 32(1) | 6(1)  | 2339.6 | 2299.6 | 0.0  |
| 32(1) | 7(1)  | 2189.9 | 2136.5 | 0.3  |
| 32(1) | 8(1)  | 2152.8 | 2112.7 | 0.0  |

|       |       |        |        |       |
|-------|-------|--------|--------|-------|
| 32(1) | 9(1)  | 2061.0 | 2021.1 | 0.0   |
| 32(1) | 10(1) | 2013.2 | 1972.4 | 0.1   |
| 32(1) | 11(1) | 1892.3 | 1854.2 | 0.0   |
| 32(1) | 12(1) | 1888.1 | 1842.9 | 0.0   |
| 32(1) | 13(1) | 1857.8 | 1820.1 | 0.1   |
| 32(1) | 14(1) | 1799.1 | 1766.5 | 0.2   |
| 32(1) | 15(1) | 1764.4 | 1734.0 | 0.6   |
| 32(1) | 16(1) | 1731.8 | 1700.6 | 0.7   |
| 32(1) | 17(1) | 1687.9 | 1658.6 | 1.6   |
| 32(1) | 18(1) | 1670.4 | 1644.9 | 101.5 |
| 32(1) | 19(1) | 1616.3 | 1581.2 | 4.8   |
| 32(1) | 20(1) | 1527.4 | 1504.6 | 0.0   |
| 32(1) | 21(1) | 1509.8 | 1490.2 | 8.9   |
| 32(1) | 22(1) | 1398.8 | 1393.9 | 0.0   |
| 32(1) | 23(1) | 1368.4 | 1354.0 | 0.0   |
| 32(1) | 24(1) | 1301.4 | 1294.3 | 0.0   |
| 32(1) | 25(1) | 1293.0 | 1277.8 | 1.6   |
| 32(1) | 26(1) | 1277.1 | 1262.0 | 4.7   |
| 32(1) | 27(1) | 1220.0 | 1213.4 | 0.0   |
| 32(1) | 28(1) | 1168.9 | 1153.9 | 0.0   |
| 32(1) | 29(1) | 1145.1 | 1134.2 | 67.4  |
| 32(1) | 30(1) | 1117.8 | 1107.2 | 0.4   |
| 32(1) | 31(1) | 1095.9 | 1071.2 | 0.0   |
| 33(1) | 1(1)  | 4282.1 | 4092.1 | 0.0   |
| 33(1) | 2(1)  | 4225.6 | 4039.1 | 0.0   |
| 33(1) | 3(1)  | 3688.5 | 3556.8 | 0.0   |
| 33(1) | 4(1)  | 3679.4 | 3546.0 | 0.0   |
| 33(1) | 5(1)  | 3639.4 | 3505.0 | 0.0   |
| 33(1) | 6(1)  | 2285.2 | 2243.4 | 0.0   |
| 33(1) | 7(1)  | 2135.5 | 2083.1 | 0.0   |
| 33(1) | 8(1)  | 2098.4 | 2054.8 | 0.0   |
| 33(1) | 9(1)  | 2006.6 | 1964.7 | 0.0   |
| 33(1) | 10(1) | 1958.8 | 1919.3 | 0.0   |
| 33(1) | 11(1) | 1837.9 | 1797.2 | 0.0   |
| 33(1) | 12(1) | 1833.7 | 1786.4 | 0.0   |
| 33(1) | 13(1) | 1803.4 | 1765.3 | 0.0   |
| 33(1) | 14(1) | 1744.7 | 1711.1 | 0.0   |
| 33(1) | 15(1) | 1710.0 | 1675.2 | 0.0   |
| 33(1) | 16(1) | 1677.4 | 1644.4 | 0.0   |
| 33(1) | 17(1) | 1633.5 | 1602.0 | 0.0   |

|       |       |        |        |      |
|-------|-------|--------|--------|------|
| 33(1) | 18(1) | 1616.0 | 1584.6 | 0.0  |
| 33(1) | 19(1) | 1561.9 | 1525.5 | 0.0  |
| 33(1) | 20(1) | 1473.0 | 1446.4 | 11.1 |
| 33(1) | 21(1) | 1455.4 | 1433.6 | 0.0  |
| 33(1) | 22(1) | 1344.4 | 1337.5 | 1.6  |
| 33(1) | 23(1) | 1314.0 | 1296.2 | 6.2  |
| 33(1) | 24(1) | 1247.0 | 1240.3 | 12.4 |
| 33(1) | 25(1) | 1238.6 | 1221.4 | 0.0  |
| 33(1) | 26(1) | 1222.7 | 1204.5 | 0.0  |
| 33(1) | 27(1) | 1165.6 | 1159.8 | 15.7 |
| 33(1) | 28(1) | 1114.5 | 1096.9 | 6.0  |
| 33(1) | 29(1) | 1090.7 | 1077.5 | 0.0  |
| 33(1) | 30(1) | 1063.4 | 1050.8 | 0.0  |
| 33(1) | 31(1) | 1041.5 | 1015.0 | 0.3  |
| 33(1) | 32(1) | 998.9  | 987.1  | 0.0  |
| 34(1) | 1(1)  | 4225.8 | 4039.3 | 0.0  |
| 34(1) | 2(1)  | 4169.3 | 3987.0 | 0.2  |
| 34(1) | 3(1)  | 3632.3 | 3504.3 | 0.0  |
| 34(1) | 4(1)  | 3623.1 | 3494.0 | 0.0  |
| 34(1) | 5(1)  | 3583.1 | 3452.4 | 0.0  |
| 34(1) | 6(1)  | 2228.9 | 2190.6 | 0.0  |
| 34(1) | 7(1)  | 2079.2 | 2030.6 | 0.0  |
| 34(1) | 8(1)  | 2042.1 | 2002.8 | 0.0  |
| 34(1) | 9(1)  | 1950.3 | 1912.1 | 0.0  |
| 34(1) | 10(1) | 1902.5 | 1865.1 | 0.1  |
| 34(1) | 11(1) | 1781.6 | 1745.4 | 6.8  |
| 34(1) | 12(1) | 1777.4 | 1733.2 | 2.1  |
| 34(1) | 13(1) | 1747.1 | 1710.7 | 0.6  |
| 34(1) | 14(1) | 1688.4 | 1658.3 | 0.7  |
| 34(1) | 15(1) | 1653.7 | 1624.6 | 0.3  |
| 34(1) | 16(1) | 1621.1 | 1591.2 | 6.8  |
| 34(1) | 17(1) | 1577.2 | 1549.5 | 0.1  |
| 34(1) | 18(1) | 1559.7 | 1533.0 | 0.1  |
| 34(1) | 19(1) | 1505.6 | 1473.1 | 0.0  |
| 34(1) | 20(1) | 1416.7 | 1395.3 | 0.0  |
| 34(1) | 21(1) | 1399.1 | 1380.8 | 0.7  |
| 34(1) | 22(1) | 1288.1 | 1285.1 | 0.0  |
| 34(1) | 23(1) | 1257.7 | 1245.0 | 0.0  |
| 34(1) | 24(1) | 1190.7 | 1185.2 | 0.0  |
| 34(1) | 25(1) | 1182.3 | 1168.3 | 0.7  |

|       |       |        |        |      |
|-------|-------|--------|--------|------|
| 34(1) | 26(1) | 1166.4 | 1151.9 | 3.0  |
| 34(1) | 27(1) | 1109.4 | 1104.3 | 0.0  |
| 34(1) | 28(1) | 1058.2 | 1045.0 | 0.0  |
| 34(1) | 29(1) | 1034.4 | 1024.3 | 0.0  |
| 34(1) | 30(1) | 1007.1 | 998.1  | 0.0  |
| 34(1) | 31(1) | 985.2  | 960.4  | 0.0  |
| 34(1) | 32(1) | 942.6  | 934.4  | 0.0  |
| 34(1) | 33(1) | 888.2  | 877.0  | 0.1  |
| 35(1) | 1(1)  | 4204.9 | 3987.3 | 1.4  |
| 35(1) | 2(1)  | 4148.5 | 3942.4 | 0.0  |
| 35(1) | 3(1)  | 3611.4 | 3460.7 | 0.0  |
| 35(1) | 4(1)  | 3602.2 | 3450.3 | 0.0  |
| 35(1) | 5(1)  | 3562.2 | 3412.3 | 0.0  |
| 35(1) | 6(1)  | 2208.0 | 2147.6 | 0.0  |
| 35(1) | 7(1)  | 2058.3 | 1987.4 | 0.0  |
| 35(1) | 8(1)  | 2021.3 | 1957.6 | 0.0  |
| 35(1) | 9(1)  | 1929.5 | 1868.3 | 0.0  |
| 35(1) | 10(1) | 1881.6 | 1819.2 | 0.0  |
| 35(1) | 11(1) | 1760.8 | 1702.2 | 0.0  |
| 35(1) | 12(1) | 1756.6 | 1690.0 | 0.0  |
| 35(1) | 13(1) | 1726.3 | 1662.9 | 0.0  |
| 35(1) | 14(1) | 1667.6 | 1616.3 | 0.0  |
| 35(1) | 15(1) | 1632.9 | 1581.3 | 0.0  |
| 35(1) | 16(1) | 1600.2 | 1552.2 | 0.0  |
| 35(1) | 17(1) | 1556.3 | 1504.9 | 0.0  |
| 35(1) | 18(1) | 1538.9 | 1488.0 | 0.0  |
| 35(1) | 19(1) | 1484.7 | 1430.7 | 0.0  |
| 35(1) | 20(1) | 1395.9 | 1353.4 | 0.1  |
| 35(1) | 21(1) | 1378.3 | 1337.0 | 0.0  |
| 35(1) | 22(1) | 1267.3 | 1241.7 | 0.7  |
| 35(1) | 23(1) | 1236.8 | 1206.1 | 12.7 |
| 35(1) | 24(1) | 1169.9 | 1141.4 | 4.8  |
| 35(1) | 25(1) | 1161.4 | 1124.9 | 0.0  |
| 35(1) | 26(1) | 1145.5 | 1106.1 | 0.0  |
| 35(1) | 27(1) | 1088.5 | 1059.6 | 20.3 |
| 35(1) | 28(1) | 1037.4 | 999.5  | 2.2  |
| 35(1) | 29(1) | 1013.5 | 980.7  | 0.0  |
| 35(1) | 30(1) | 986.2  | 953.7  | 0.0  |
| 35(1) | 31(1) | 964.4  | 917.7  | 0.3  |
| 35(1) | 32(1) | 921.7  | 890.4  | 0.1  |

|       |       |        |        |      |
|-------|-------|--------|--------|------|
| 35(1) | 33(1) | 867.3  | 833.5  | 0.5  |
| 35(1) | 34(1) | 811.0  | 781.0  | 0.0  |
| 36(1) | 1(1)  | 4173.9 | 3988.5 | 0.0  |
| 36(1) | 2(1)  | 4117.4 | 3935.9 | 0.1  |
| 36(1) | 3(1)  | 3580.3 | 3453.5 | 0.0  |
| 36(1) | 4(1)  | 3571.2 | 3443.1 | 0.0  |
| 36(1) | 5(1)  | 3531.2 | 3401.7 | 0.0  |
| 36(1) | 6(1)  | 2177.0 | 2140.1 | 0.0  |
| 36(1) | 7(1)  | 2027.3 | 1980.0 | 0.3  |
| 36(1) | 8(1)  | 1990.2 | 1951.8 | 0.0  |
| 36(1) | 9(1)  | 1898.4 | 1861.3 | 0.1  |
| 36(1) | 10(1) | 1850.6 | 1814.2 | 0.2  |
| 36(1) | 11(1) | 1729.7 | 1694.5 | 1.5  |
| 36(1) | 12(1) | 1725.5 | 1682.6 | 0.9  |
| 36(1) | 13(1) | 1695.2 | 1659.9 | 1.5  |
| 36(1) | 14(1) | 1636.5 | 1607.4 | 0.7  |
| 36(1) | 15(1) | 1601.8 | 1574.2 | 0.9  |
| 36(1) | 16(1) | 1569.2 | 1540.7 | 0.2  |
| 36(1) | 17(1) | 1525.3 | 1498.9 | 0.1  |
| 36(1) | 18(1) | 1507.8 | 1482.3 | 0.7  |
| 36(1) | 19(1) | 1453.7 | 1422.2 | 1.2  |
| 36(1) | 20(1) | 1364.8 | 1344.7 | 0.0  |
| 36(1) | 21(1) | 1347.2 | 1330.5 | 2.4  |
| 36(1) | 22(1) | 1236.2 | 1234.2 | 0.0  |
| 36(1) | 23(1) | 1205.8 | 1194.2 | 0.0  |
| 36(1) | 24(1) | 1138.8 | 1134.5 | 0.0  |
| 36(1) | 25(1) | 1130.3 | 1117.3 | 0.4  |
| 36(1) | 26(1) | 1114.5 | 1101.0 | 0.1  |
| 36(1) | 27(1) | 1057.4 | 1053.6 | 0.0  |
| 36(1) | 28(1) | 1006.3 | 994.2  | 0.0  |
| 36(1) | 29(1) | 982.5  | 973.1  | 36.0 |
| 36(1) | 30(1) | 955.2  | 947.1  | 0.0  |
| 36(1) | 31(1) | 933.3  | 910.0  | 0.0  |
| 36(1) | 32(1) | 890.7  | 883.5  | 0.0  |
| 36(1) | 33(1) | 836.3  | 827.1  | 0.0  |
| 36(1) | 34(1) | 780.0  | 774.7  | 0.0  |
| 36(1) | 35(1) | 759.1  | 730.8  | 0.0  |
| 37(1) | 1(1)  | 4144.5 | 3957.6 | 0.0  |
| 37(1) | 2(1)  | 4088.1 | 3905.5 | 0.8  |
| 37(1) | 3(1)  | 3551.0 | 3422.3 | 0.0  |



|       |       |        |        |      |
|-------|-------|--------|--------|------|
| 37(1) | 4(1)  | 3541.8 | 3412.2 | 0.0  |
| 37(1) | 5(1)  | 3501.9 | 3370.6 | 0.0  |
| 37(1) | 6(1)  | 2147.6 | 2108.5 | 0.0  |
| 37(1) | 7(1)  | 1997.9 | 1948.4 | 0.0  |
| 37(1) | 8(1)  | 1960.9 | 1920.5 | 0.0  |
| 37(1) | 9(1)  | 1869.1 | 1829.4 | 0.2  |
| 37(1) | 10(1) | 1821.3 | 1783.0 | 0.4  |
| 37(1) | 11(1) | 1700.4 | 1664.2 | 2.7  |
| 37(1) | 12(1) | 1696.2 | 1652.1 | 5.7  |
| 37(1) | 13(1) | 1665.9 | 1629.1 | 11.6 |
| 37(1) | 14(1) | 1607.2 | 1575.8 | 0.3  |
| 37(1) | 15(1) | 1572.5 | 1543.1 | 0.1  |
| 37(1) | 16(1) | 1539.8 | 1510.5 | 1.7  |
| 37(1) | 17(1) | 1495.9 | 1467.9 | 4.8  |
| 37(1) | 18(1) | 1478.5 | 1450.8 | 7.1  |
| 37(1) | 19(1) | 1424.3 | 1391.0 | 0.1  |
| 37(1) | 20(1) | 1335.5 | 1313.7 | 0.0  |
| 37(1) | 21(1) | 1317.9 | 1298.5 | 0.4  |
| 37(1) | 22(1) | 1206.9 | 1203.1 | 0.0  |
| 37(1) | 23(1) | 1176.4 | 1162.9 | 0.0  |
| 37(1) | 24(1) | 1109.5 | 1103.3 | 0.0  |
| 37(1) | 25(1) | 1101.0 | 1087.0 | 0.3  |
| 37(1) | 26(1) | 1085.1 | 1069.9 | 0.2  |
| 37(1) | 27(1) | 1028.1 | 1022.5 | 0.0  |
| 37(1) | 28(1) | 977.0  | 963.1  | 0.0  |
| 37(1) | 29(1) | 953.1  | 942.6  | 0.0  |
| 37(1) | 30(1) | 925.8  | 916.4  | 0.0  |
| 37(1) | 31(1) | 904.0  | 878.4  | 0.0  |
| 37(1) | 32(1) | 861.3  | 852.1  | 0.0  |
| 37(1) | 33(1) | 806.9  | 796.1  | 0.0  |
| 37(1) | 34(1) | 750.6  | 743.2  | 0.2  |
| 37(1) | 35(1) | 729.8  | 699.6  | 0.0  |
| 37(1) | 36(1) | 698.7  | 692.2  | 0.0  |
| 38(1) | 1(1)  | 4104.6 | 3921.4 | 0.0  |
| 38(1) | 2(1)  | 4048.1 | 3868.8 | 0.0  |
| 38(1) | 3(1)  | 3511.0 | 3386.3 | 0.0  |
| 38(1) | 4(1)  | 3501.9 | 3376.0 | 0.0  |
| 38(1) | 5(1)  | 3461.9 | 3334.5 | 0.0  |
| 38(1) | 6(1)  | 2107.7 | 2072.6 | 0.0  |
| 38(1) | 7(1)  | 1958.0 | 1913.2 | 0.0  |

|       |       |        |        |      |
|-------|-------|--------|--------|------|
| 38(1) | 8(1)  | 1920.9 | 1884.6 | 0.0  |
| 38(1) | 9(1)  | 1829.1 | 1794.2 | 0.0  |
| 38(1) | 10(1) | 1781.3 | 1747.3 | 0.0  |
| 38(1) | 11(1) | 1660.4 | 1627.4 | 0.0  |
| 38(1) | 12(1) | 1656.2 | 1615.8 | 0.0  |
| 38(1) | 13(1) | 1625.9 | 1593.5 | 0.0  |
| 38(1) | 14(1) | 1567.2 | 1539.6 | 0.0  |
| 38(1) | 15(1) | 1532.5 | 1507.1 | 0.0  |
| 38(1) | 16(1) | 1499.9 | 1474.0 | 0.0  |
| 38(1) | 17(1) | 1455.9 | 1430.1 | 0.0  |
| 38(1) | 18(1) | 1438.5 | 1415.4 | 0.0  |
| 38(1) | 19(1) | 1384.3 | 1355.7 | 0.0  |
| 38(1) | 20(1) | 1295.5 | 1278.7 | 2.8  |
| 38(1) | 21(1) | 1277.9 | 1262.8 | 0.0  |
| 38(1) | 22(1) | 1166.9 | 1168.2 | 13.9 |
| 38(1) | 23(1) | 1136.5 | 1126.1 | 26.7 |
| 38(1) | 24(1) | 1069.5 | 1067.8 | 0.4  |
| 38(1) | 25(1) | 1061.0 | 1050.8 | 0.0  |
| 38(1) | 26(1) | 1045.2 | 1034.1 | 0.0  |
| 38(1) | 27(1) | 988.1  | 986.8  | 0.9  |
| 38(1) | 28(1) | 937.0  | 927.5  | 0.5  |
| 38(1) | 29(1) | 913.2  | 906.6  | 0.0  |
| 38(1) | 30(1) | 885.9  | 881.9  | 0.0  |
| 38(1) | 31(1) | 864.0  | 845.1  | 0.9  |
| 38(1) | 32(1) | 821.4  | 816.1  | 0.0  |
| 38(1) | 33(1) | 767.0  | 762.1  | 0.0  |
| 38(1) | 34(1) | 710.7  | 708.9  | 0.0  |
| 38(1) | 35(1) | 689.8  | 665.2  | 0.3  |
| 38(1) | 36(1) | 658.7  | 658.0  | 0.0  |
| 38(1) | 37(1) | 629.4  | 625.3  | 0.0  |
| 39(1) | 1(1)  | 4038.2 | 3851.6 | 0.1  |
| 39(1) | 2(1)  | 3981.7 | 3798.8 | 0.0  |
| 39(1) | 3(1)  | 3444.7 | 3316.4 | 0.0  |
| 39(1) | 4(1)  | 3435.5 | 3306.2 | 0.0  |
| 39(1) | 5(1)  | 3395.5 | 3264.8 | 0.0  |
| 39(1) | 6(1)  | 2041.3 | 2003.1 | 0.0  |
| 39(1) | 7(1)  | 1891.6 | 1843.4 | 0.0  |
| 39(1) | 8(1)  | 1854.5 | 1815.1 | 0.0  |
| 39(1) | 9(1)  | 1762.7 | 1724.7 | 0.0  |
| 39(1) | 10(1) | 1714.9 | 1677.6 | 0.0  |

|       |       |        |        |     |
|-------|-------|--------|--------|-----|
| 39(1) | 11(1) | 1594.0 | 1557.7 | 0.0 |
| 39(1) | 12(1) | 1589.8 | 1545.9 | 0.0 |
| 39(1) | 13(1) | 1559.5 | 1523.4 | 0.2 |
| 39(1) | 14(1) | 1500.8 | 1470.7 | 0.0 |
| 39(1) | 15(1) | 1466.1 | 1437.3 | 0.0 |
| 39(1) | 16(1) | 1433.5 | 1403.8 | 0.1 |
| 39(1) | 17(1) | 1389.6 | 1361.6 | 0.0 |
| 39(1) | 18(1) | 1372.1 | 1345.3 | 0.0 |
| 39(1) | 19(1) | 1318.0 | 1285.6 | 0.0 |
| 39(1) | 20(1) | 1229.1 | 1207.8 | 0.4 |
| 39(1) | 21(1) | 1211.5 | 1193.1 | 0.0 |
| 39(1) | 22(1) | 1100.5 | 1098.0 | 0.0 |
| 39(1) | 23(1) | 1070.1 | 1057.0 | 0.1 |
| 39(1) | 24(1) | 1003.1 | 997.8  | 0.0 |
| 39(1) | 25(1) | 994.7  | 981.0  | 0.0 |
| 39(1) | 26(1) | 978.8  | 964.8  | 0.0 |
| 39(1) | 27(1) | 921.8  | 916.8  | 0.1 |
| 39(1) | 28(1) | 870.6  | 857.1  | 0.0 |
| 39(1) | 29(1) | 846.8  | 837.1  | 0.4 |
| 39(1) | 30(1) | 819.5  | 811.0  | 0.0 |
| 39(1) | 31(1) | 797.6  | 774.3  | 0.0 |
| 39(1) | 32(1) | 755.0  | 748.2  | 0.0 |
| 39(1) | 33(1) | 700.6  | 689.9  | 0.0 |
| 39(1) | 34(1) | 644.3  | 637.3  | 0.0 |
| 39(1) | 35(1) | 623.4  | 594.5  | 0.3 |
| 39(1) | 36(1) | 592.4  | 586.3  | 0.0 |
| 39(1) | 37(1) | 563.0  | 555.4  | 0.0 |
| 39(1) | 38(1) | 523.1  | 519.1  | 0.5 |
| 40(1) | 1(1)  | 4030.7 | 3845.2 | 0.0 |
| 40(1) | 2(1)  | 3974.3 | 3792.8 | 1.2 |
| 40(1) | 3(1)  | 3437.2 | 3309.9 | 0.0 |
| 40(1) | 4(1)  | 3428.0 | 3300.1 | 0.0 |
| 40(1) | 5(1)  | 3388.0 | 3258.2 | 0.0 |
| 40(1) | 6(1)  | 2033.8 | 1996.0 | 0.2 |
| 40(1) | 7(1)  | 1884.1 | 1837.5 | 0.0 |
| 40(1) | 8(1)  | 1847.1 | 1808.5 | 0.2 |
| 40(1) | 9(1)  | 1755.3 | 1718.0 | 0.3 |
| 40(1) | 10(1) | 1707.4 | 1671.3 | 3.0 |
| 40(1) | 11(1) | 1586.6 | 1550.5 | 2.7 |
| 40(1) | 12(1) | 1582.4 | 1537.3 | 0.6 |

|       |       |        |        |       |
|-------|-------|--------|--------|-------|
| 40(1) | 13(1) | 1552.1 | 1517.0 | 0.1   |
| 40(1) | 14(1) | 1493.3 | 1463.8 | 0.1   |
| 40(1) | 15(1) | 1458.7 | 1431.0 | 0.5   |
| 40(1) | 16(1) | 1426.0 | 1397.3 | 0.6   |
| 40(1) | 17(1) | 1382.1 | 1355.3 | 0.3   |
| 40(1) | 18(1) | 1364.7 | 1339.6 | 372.6 |
| 40(1) | 19(1) | 1310.5 | 1279.1 | 0.2   |
| 40(1) | 20(1) | 1221.7 | 1201.4 | 0.0   |
| 40(1) | 21(1) | 1204.1 | 1187.0 | 0.4   |
| 40(1) | 22(1) | 1093.1 | 1090.7 | 0.0   |
| 40(1) | 23(1) | 1062.6 | 1050.6 | 0.0   |
| 40(1) | 24(1) | 995.7  | 990.8  | 0.0   |
| 40(1) | 25(1) | 987.2  | 974.6  | 1.4   |
| 40(1) | 26(1) | 971.3  | 957.6  | 0.1   |
| 40(1) | 27(1) | 914.3  | 910.2  | 0.0   |
| 40(1) | 28(1) | 863.2  | 850.6  | 0.0   |
| 40(1) | 29(1) | 839.3  | 830.1  | 0.0   |
| 40(1) | 30(1) | 812.0  | 804.3  | 0.0   |
| 40(1) | 31(1) | 790.2  | 765.7  | 0.1   |
| 40(1) | 32(1) | 747.5  | 739.8  | 0.0   |
| 40(1) | 33(1) | 693.1  | 683.2  | 0.0   |
| 40(1) | 34(1) | 636.8  | 631.2  | 0.4   |
| 40(1) | 35(1) | 616.0  | 587.8  | 0.0   |
| 40(1) | 36(1) | 584.9  | 580.0  | 0.0   |
| 40(1) | 37(1) | 555.6  | 548.9  | 0.5   |
| 40(1) | 38(1) | 515.6  | 513.3  | 0.0   |
| 40(1) | 39(1) | 449.2  | 442.7  | 0.0   |
| 41(1) | 1(1)  | 3910.4 | 3727.7 | 0.0   |
| 41(1) | 2(1)  | 3854.0 | 3674.8 | 0.1   |
| 41(1) | 3(1)  | 3316.9 | 3192.5 | 0.0   |
| 41(1) | 4(1)  | 3307.7 | 3182.1 | 0.0   |
| 41(1) | 5(1)  | 3267.7 | 3140.8 | 0.0   |
| 41(1) | 6(1)  | 1913.5 | 1878.9 | 0.2   |
| 41(1) | 7(1)  | 1763.8 | 1719.7 | 0.1   |
| 41(1) | 8(1)  | 1726.7 | 1691.1 | 0.0   |
| 41(1) | 9(1)  | 1635.0 | 1600.8 | 0.1   |
| 41(1) | 10(1) | 1587.1 | 1553.7 | 0.0   |
| 41(1) | 11(1) | 1466.3 | 1433.7 | 0.0   |
| 41(1) | 12(1) | 1462.1 | 1422.1 | 0.0   |
| 41(1) | 13(1) | 1431.8 | 1399.6 | 0.1   |

|       |       |        |        |     |
|-------|-------|--------|--------|-----|
| 41(1) | 14(1) | 1373.0 | 1346.8 | 0.0 |
| 41(1) | 15(1) | 1338.4 | 1313.4 | 0.0 |
| 41(1) | 16(1) | 1305.7 | 1279.9 | 0.0 |
| 41(1) | 17(1) | 1261.8 | 1237.8 | 0.0 |
| 41(1) | 18(1) | 1244.4 | 1221.2 | 0.0 |
| 41(1) | 19(1) | 1190.2 | 1161.6 | 0.0 |
| 41(1) | 20(1) | 1101.4 | 1083.4 | 0.0 |
| 41(1) | 21(1) | 1083.8 | 1069.1 | 0.0 |
| 41(1) | 22(1) | 972.8  | 972.9  | 0.1 |
| 41(1) | 23(1) | 942.3  | 933.1  | 0.1 |
| 41(1) | 24(1) | 875.4  | 873.8  | 0.1 |
| 41(1) | 25(1) | 866.9  | 857.2  | 0.0 |
| 41(1) | 26(1) | 851.0  | 840.4  | 0.0 |
| 41(1) | 27(1) | 794.0  | 792.4  | 0.1 |
| 41(1) | 28(1) | 742.8  | 733.0  | 0.0 |
| 41(1) | 29(1) | 719.0  | 713.6  | 0.0 |
| 41(1) | 30(1) | 691.7  | 686.7  | 0.0 |
| 41(1) | 31(1) | 669.8  | 650.1  | 0.3 |
| 41(1) | 32(1) | 627.2  | 622.7  | 0.0 |
| 41(1) | 33(1) | 572.8  | 565.8  | 0.1 |
| 41(1) | 34(1) | 516.5  | 514.3  | 0.0 |
| 41(1) | 35(1) | 495.7  | 470.6  | 0.3 |
| 41(1) | 36(1) | 464.6  | 462.7  | 0.0 |
| 41(1) | 37(1) | 435.3  | 431.8  | 0.0 |
| 41(1) | 38(1) | 395.3  | 395.3  | 0.4 |
| 41(1) | 39(1) | 328.9  | 325.5  | 0.0 |
| 41(1) | 40(1) | 321.4  | 319.2  | 0.0 |
| 42(1) | 1(1)  | 3874.1 | 3691.6 | 0.0 |
| 42(1) | 2(1)  | 3817.7 | 3641.2 | 0.0 |
| 42(1) | 3(1)  | 3280.6 | 3156.8 | 0.0 |
| 42(1) | 4(1)  | 3271.4 | 3146.3 | 0.0 |
| 42(1) | 5(1)  | 3231.5 | 3104.9 | 0.0 |
| 42(1) | 6(1)  | 1877.2 | 1843.6 | 0.8 |
| 42(1) | 7(1)  | 1727.5 | 1684.3 | 0.0 |
| 42(1) | 8(1)  | 1690.5 | 1656.0 | 0.0 |
| 42(1) | 9(1)  | 1598.7 | 1565.3 | 0.0 |
| 42(1) | 10(1) | 1550.9 | 1518.2 | 0.0 |
| 42(1) | 11(1) | 1430.0 | 1397.8 | 0.5 |
| 42(1) | 12(1) | 1425.8 | 1385.4 | 0.8 |
| 42(1) | 13(1) | 1395.5 | 1363.8 | 0.0 |

|       |       |        |        |     |
|-------|-------|--------|--------|-----|
| 42(1) | 14(1) | 1336.8 | 1311.3 | 0.0 |
| 42(1) | 15(1) | 1302.1 | 1277.5 | 0.0 |
| 42(1) | 16(1) | 1269.4 | 1244.4 | 0.0 |
| 42(1) | 17(1) | 1225.5 | 1202.1 | 0.0 |
| 42(1) | 18(1) | 1208.1 | 1185.4 | 0.0 |
| 42(1) | 19(1) | 1153.9 | 1126.2 | 0.2 |
| 42(1) | 20(1) | 1065.1 | 1046.6 | 0.0 |
| 42(1) | 21(1) | 1047.5 | 1034.0 | 0.0 |
| 42(1) | 22(1) | 936.5  | 937.4  | 0.0 |
| 42(1) | 23(1) | 906.0  | 897.4  | 0.0 |
| 42(1) | 24(1) | 839.1  | 838.7  | 0.1 |
| 42(1) | 25(1) | 830.6  | 821.6  | 0.0 |
| 42(1) | 26(1) | 814.7  | 804.9  | 0.0 |
| 42(1) | 27(1) | 757.7  | 758.2  | 0.1 |
| 42(1) | 28(1) | 706.6  | 697.1  | 0.0 |
| 42(1) | 29(1) | 682.7  | 676.1  | 1.0 |
| 42(1) | 30(1) | 655.4  | 650.3  | 0.3 |
| 42(1) | 31(1) | 633.6  | 615.7  | 0.3 |
| 42(1) | 32(1) | 590.9  | 586.8  | 0.0 |
| 42(1) | 33(1) | 536.5  | 529.6  | 0.3 |
| 42(1) | 34(1) | 480.2  | 478.8  | 0.2 |
| 42(1) | 35(1) | 459.4  | 431.6  | 0.0 |
| 42(1) | 36(1) | 428.3  | 429.3  | 0.0 |
| 42(1) | 37(1) | 399.0  | 394.4  | 0.0 |
| 42(1) | 38(1) | 359.0  | 356.2  | 2.5 |
| 42(1) | 39(1) | 292.6  | 287.6  | 0.0 |
| 42(1) | 40(1) | 285.2  | 282.0  | 0.0 |
| 42(1) | 41(1) | 164.9  | 165.9  | 0.0 |

**Table S19.** Harmonic and anharmonic vibrational frequencies and their intensities of conformer **D2** as computed at the B3LYP/cc-pVTZ level of theory.

| Mode (quanta) | $\nu_{\text{harm}}$<br>( $\text{cm}^{-1}$ ) | $\nu_{\text{anharm}}$<br>( $\text{cm}^{-1}$ ) | $I_{\text{harm}}$<br>( $\text{km mol}^{-1}$ ) | $I_{\text{anharm}}$<br>( $\text{km mol}^{-1}$ ) |
|---------------|---------------------------------------------|-----------------------------------------------|-----------------------------------------------|-------------------------------------------------|
| 1(1)          | 3811.9                                      | 3636.2                                        | 87.4                                          | 72.6                                            |
| 2(1)          | 3798.7                                      | 3611.4                                        | 31.0                                          | 26.1                                            |
| 3(1)          | 3214.5                                      | 3084.8                                        | 0.3                                           | 0.1                                             |
| 4(1)          | 3180.0                                      | 3043.2                                        | 4.4                                           | 5.5                                             |
| 5(1)          | 3164.4                                      | 3037.4                                        | 8.1                                           | 6.3                                             |
| 6(1)          | 1837.4                                      | 1804.5                                        | 357.5                                         | 272.8                                           |
| 7(1)          | 1661.8                                      | 1615.7                                        | 220.6                                         | 71.0                                            |
| 8(1)          | 1623.6                                      | 1586.7                                        | 96.7                                          | 65.1                                            |
| 9(1)          | 1537.9                                      | 1499.2                                        | 44.1                                          | 30.8                                            |
| 10(1)         | 1490.1                                      | 1454.9                                        | 54.5                                          | 15.5                                            |
| 11(1)         | 1360.8                                      | 1328.4                                        | 21.7                                          | 0.7                                             |
| 12(1)         | 1341.8                                      | 1311.1                                        | 40.9                                          | 19.2                                            |
| 13(1)         | 1302.0                                      | 1267.7                                        | 587.6                                         | 214.0                                           |
| 14(1)         | 1282.6                                      | 1260.2                                        | 15.4                                          | 23.7                                            |
| 15(1)         | 1228.1                                      | 1211.2                                        | 26.1                                          | 31.6                                            |
| 16(1)         | 1202.4                                      | 1176.5                                        | 27.4                                          | 20.0                                            |
| 17(1)         | 1178.2                                      | 1156.7                                        | 42.5                                          | 16.4                                            |
| 18(1)         | 1150.4                                      | 1127.7                                        | 201.0                                         | 103.9                                           |
| 19(1)         | 1071.1                                      | 1049.5                                        | 49.6                                          | 47.3                                            |
| 20(1)         | 991.5                                       | 975.1                                         | 36.2                                          | 38.8                                            |
| 21(1)         | 965.9                                       | 952.9                                         | 2.7                                           | 1.4                                             |
| 22(1)         | 885.2                                       | 881.2                                         | 29.9                                          | 34.2                                            |
| 23(1)         | 828.5                                       | 820.0                                         | 12.1                                          | 10.0                                            |
| 24(1)         | 781.4                                       | 774.1                                         | 20.9                                          | 13.5                                            |
| 25(1)         | 763.9                                       | 751.8                                         | 8.7                                           | 8.5                                             |
| 26(1)         | 752.1                                       | 739.7                                         | 10.4                                          | 4.3                                             |
| 27(1)         | 710.1                                       | 705.3                                         | 8.5                                           | 11.9                                            |
| 28(1)         | 650.1                                       | 641.5                                         | 8.7                                           | 8.2                                             |
| 29(1)         | 600.6                                       | 594.2                                         | 16.4                                          | 16.4                                            |
| 30(1)         | 584.0                                       | 576.2                                         | 1.9                                           | 3.1                                             |
| 31(1)         | 525.5                                       | 520.0                                         | 4.3                                           | 4.1                                             |
| 32(1)         | 498.4                                       | 454.7                                         | 92.2                                          | 81.9                                            |
| 33(1)         | 473.8                                       | 466.9                                         | 0.9                                           | 1.5                                             |
| 34(1)         | 431.0                                       | 425.7                                         | 13.4                                          | 16.5                                            |
| 35(1)         | 385.2                                       | 375.5                                         | 97.8                                          | 92.1                                            |
| 36(1)         | 362.6                                       | 361.3                                         | 3.0                                           | 2.8                                             |
| 37(1)         | 308.6                                       | 305.1                                         | 1.7                                           | 1.5                                             |

|       |        |        |     |      |
|-------|--------|--------|-----|------|
| 38(1) | 267.3  | 264.7  | 5.0 | 4.8  |
| 39(1) | 227.6  | 225.9  | 1.2 | 0.9  |
| 40(1) | 178.4  | 177.0  | 3.0 | 2.8  |
| 41(1) | 95.2   | 93.2   | 1.8 | 1.6  |
| 42(1) | 62.3   | 60.9   | 3.4 | 3.8  |
| 1(2)  | 7623.8 | 7107.5 |     | 6.1  |
| 2(2)  | 7597.3 | 7054.7 |     | 3.1  |
| 3(2)  | 6429.0 | 6070.1 |     | 0.7  |
| 4(2)  | 6360.0 | 6054.7 |     | 0.3  |
| 5(2)  | 6328.7 | 6030.5 |     | 0.8  |
| 6(2)  | 3674.7 | 3587.9 |     | 5.1  |
| 7(2)  | 3323.6 | 3234.7 |     | 0.5  |
| 8(2)  | 3247.3 | 3168.2 |     | 0.7  |
| 9(2)  | 3075.9 | 2996.4 |     | 0.1  |
| 10(2) | 2980.2 | 2908.4 |     | 0.1  |
| 11(2) | 2721.6 | 2662.0 |     | 1.8  |
| 12(2) | 2683.5 | 2618.2 |     | 0.8  |
| 13(2) | 2604.1 | 2519.6 |     | 0.1  |
| 14(2) | 2565.3 | 2516.6 |     | 0.2  |
| 15(2) | 2456.2 | 2400.5 |     | 1.8  |
| 16(2) | 2404.8 | 2336.9 |     | 0.8  |
| 17(2) | 2356.4 | 2312.1 |     | 0.2  |
| 18(2) | 2300.9 | 2255.0 |     | 0.2  |
| 19(2) | 2142.3 | 2094.3 |     | 1.5  |
| 20(2) | 1983.1 | 1949.0 |     | 0.3  |
| 21(2) | 1931.7 | 1905.5 |     | 3.7  |
| 22(2) | 1770.4 | 1764.7 |     | 1.1  |
| 23(2) | 1657.0 | 1641.0 |     | 2.3  |
| 24(2) | 1562.8 | 1548.6 |     | 0.9  |
| 25(2) | 1527.8 | 1502.6 |     | 1.1  |
| 26(2) | 1504.2 | 1479.2 |     | 0.5  |
| 27(2) | 1420.1 | 1406.6 |     | 0.1  |
| 28(2) | 1300.2 | 1282.7 |     | 89.1 |
| 29(2) | 1201.2 | 1187.6 |     | 14.1 |
| 30(2) | 1168.1 | 1151.6 |     | 0.4  |
| 31(2) | 1050.9 | 1039.8 |     | 0.1  |
| 32(2) | 996.9  | 873.2  |     | 1.2  |
| 33(2) | 947.7  | 934.1  |     | 0.1  |
| 34(2) | 862.0  | 850.6  |     | 0.1  |
| 35(2) | 770.3  | 739.1  |     | 14.9 |



|       |      |        |        |     |
|-------|------|--------|--------|-----|
| 36(2) |      | 725.2  | 717.3  | 0.1 |
| 37(2) |      | 617.2  | 610.0  | 0.1 |
| 38(2) |      | 534.6  | 529.2  | 0.3 |
| 39(2) |      | 455.3  | 451.4  | 0.3 |
| 40(2) |      | 356.8  | 354.1  | 0.1 |
| 41(2) |      | 190.4  | 186.5  | 0.0 |
| 42(2) |      | 124.6  | 120.3  | 0.0 |
| 2(1)  | 1(1) | 7610.6 | 7247.3 | 0.0 |
| 3(1)  | 1(1) | 7026.4 | 6725.4 | 0.0 |
| 3(1)  | 2(1) | 7013.1 | 6700.7 | 0.0 |
| 4(1)  | 1(1) | 6991.9 | 6693.2 | 0.0 |
| 4(1)  | 2(1) | 6978.7 | 6668.6 | 0.0 |
| 4(1)  | 3(1) | 6394.5 | 6146.7 | 0.0 |
| 5(1)  | 1(1) | 6976.3 | 6680.7 | 0.0 |
| 5(1)  | 2(1) | 6963.0 | 6656.7 | 0.0 |
| 5(1)  | 3(1) | 6378.8 | 6134.7 | 0.0 |
| 5(1)  | 4(1) | 6344.4 | 5999.4 | 0.2 |
| 6(1)  | 1(1) | 5649.3 | 5439.7 | 0.0 |
| 6(1)  | 2(1) | 5636.0 | 5411.8 | 0.1 |
| 6(1)  | 3(1) | 5051.8 | 4892.9 | 0.0 |
| 6(1)  | 4(1) | 5017.4 | 4861.2 | 0.0 |
| 6(1)  | 5(1) | 5001.7 | 4849.0 | 0.0 |
| 7(1)  | 1(1) | 5473.7 | 5253.4 | 0.0 |
| 7(1)  | 2(1) | 5460.5 | 5229.9 | 0.0 |
| 7(1)  | 3(1) | 4876.3 | 4710.1 | 0.0 |
| 7(1)  | 4(1) | 4841.8 | 4676.3 | 0.1 |
| 7(1)  | 5(1) | 4826.2 | 4667.1 | 0.2 |
| 7(1)  | 6(1) | 3499.2 | 3421.8 | 0.1 |
| 8(1)  | 1(1) | 5435.6 | 5221.5 | 0.6 |
| 8(1)  | 2(1) | 5422.3 | 5198.1 | 0.0 |
| 8(1)  | 3(1) | 4838.1 | 4674.2 | 0.2 |
| 8(1)  | 4(1) | 4803.7 | 4643.4 | 0.1 |
| 8(1)  | 5(1) | 4788.0 | 4633.6 | 0.2 |
| 8(1)  | 6(1) | 3461.0 | 3389.7 | 0.0 |
| 8(1)  | 7(1) | 3285.5 | 3203.7 | 0.5 |
| 9(1)  | 1(1) | 5349.9 | 5137.5 | 0.0 |
| 9(1)  | 2(1) | 5336.6 | 5113.7 | 0.0 |
| 9(1)  | 3(1) | 4752.4 | 4591.7 | 0.0 |
| 9(1)  | 4(1) | 4718.0 | 4566.0 | 0.0 |
| 9(1)  | 5(1) | 4702.3 | 4548.6 | 0.1 |

|       |       |        |        |     |
|-------|-------|--------|--------|-----|
| 9(1)  | 6(1)  | 3375.3 | 3305.5 | 0.0 |
| 9(1)  | 7(1)  | 3199.8 | 3129.6 | 0.0 |
| 9(1)  | 8(1)  | 3161.6 | 3090.3 | 0.0 |
| 10(1) | 1(1)  | 5302.0 | 5090.1 | 0.6 |
| 10(1) | 2(1)  | 5288.7 | 5067.7 | 0.0 |
| 10(1) | 3(1)  | 4704.6 | 4549.8 | 0.1 |
| 10(1) | 4(1)  | 4670.1 | 4513.8 | 0.0 |
| 10(1) | 5(1)  | 4654.4 | 4508.7 | 0.0 |
| 10(1) | 6(1)  | 3327.4 | 3259.7 | 0.0 |
| 10(1) | 7(1)  | 3151.9 | 3067.8 | 1.9 |
| 10(1) | 8(1)  | 3113.7 | 3036.8 | 0.4 |
| 10(1) | 9(1)  | 3028.0 | 2954.5 | 0.0 |
| 11(1) | 1(1)  | 5172.7 | 4966.3 | 0.3 |
| 11(1) | 2(1)  | 5159.5 | 4943.1 | 0.0 |
| 11(1) | 3(1)  | 4575.3 | 4422.5 | 0.0 |
| 11(1) | 4(1)  | 4540.8 | 4393.1 | 0.0 |
| 11(1) | 5(1)  | 4525.2 | 4380.1 | 0.0 |
| 11(1) | 6(1)  | 3198.2 | 3135.3 | 0.0 |
| 11(1) | 7(1)  | 3022.6 | 2940.4 | 0.0 |
| 11(1) | 8(1)  | 2984.4 | 2909.9 | 0.3 |
| 11(1) | 9(1)  | 2898.8 | 2828.0 | 0.6 |
| 11(1) | 10(1) | 2850.9 | 2783.6 | 1.3 |
| 12(1) | 1(1)  | 5153.7 | 4947.8 | 0.4 |
| 12(1) | 2(1)  | 5140.4 | 4922.3 | 0.0 |
| 12(1) | 3(1)  | 4556.2 | 4400.2 | 0.3 |
| 12(1) | 4(1)  | 4521.8 | 4367.4 | 0.1 |
| 12(1) | 5(1)  | 4506.1 | 4357.0 | 0.1 |
| 12(1) | 6(1)  | 3179.1 | 3114.4 | 0.8 |
| 12(1) | 7(1)  | 3003.6 | 2925.0 | 0.0 |
| 12(1) | 8(1)  | 2965.4 | 2895.7 | 0.0 |
| 12(1) | 9(1)  | 2879.7 | 2809.4 | 0.7 |
| 12(1) | 10(1) | 2831.8 | 2763.1 | 0.0 |
| 12(1) | 11(1) | 2702.6 | 2639.6 | 0.1 |
| 13(1) | 1(1)  | 5113.9 | 4900.9 | 0.1 |
| 13(1) | 2(1)  | 5100.7 | 4873.2 | 1.0 |
| 13(1) | 3(1)  | 4516.5 | 4352.8 | 0.0 |
| 13(1) | 4(1)  | 4482.0 | 4322.6 | 0.0 |
| 13(1) | 5(1)  | 4466.4 | 4310.4 | 0.0 |
| 13(1) | 6(1)  | 3139.4 | 3065.8 | 0.2 |
| 13(1) | 7(1)  | 2963.8 | 2880.9 | 0.2 |

|       |       |        |        |     |
|-------|-------|--------|--------|-----|
| 13(1) | 8(1)  | 2925.7 | 2850.7 | 0.0 |
| 13(1) | 9(1)  | 2840.0 | 2765.6 | 0.0 |
| 13(1) | 10(1) | 2792.1 | 2720.3 | 0.1 |
| 13(1) | 11(1) | 2662.8 | 2595.2 | 0.1 |
| 13(1) | 12(1) | 2643.8 | 2574.1 | 0.3 |
| 14(1) | 1(1)  | 5094.6 | 4895.7 | 0.0 |
| 14(1) | 2(1)  | 5081.3 | 4871.1 | 0.0 |
| 14(1) | 3(1)  | 4497.1 | 4347.0 | 0.1 |
| 14(1) | 4(1)  | 4462.7 | 4313.5 | 0.0 |
| 14(1) | 5(1)  | 4447.0 | 4303.1 | 0.0 |
| 14(1) | 6(1)  | 3120.0 | 3063.2 | 0.0 |
| 14(1) | 7(1)  | 2944.5 | 2873.8 | 0.1 |
| 14(1) | 8(1)  | 2906.3 | 2845.0 | 0.1 |
| 14(1) | 9(1)  | 2820.6 | 2758.2 | 0.1 |
| 14(1) | 10(1) | 2772.7 | 2714.2 | 0.0 |
| 14(1) | 11(1) | 2643.4 | 2589.6 | 0.3 |
| 14(1) | 12(1) | 2624.4 | 2569.6 | 0.1 |
| 14(1) | 13(1) | 2584.7 | 2524.1 | 0.1 |
| 15(1) | 1(1)  | 5040.0 | 4830.5 | 0.7 |
| 15(1) | 2(1)  | 5026.7 | 4813.6 | 0.0 |
| 15(1) | 3(1)  | 4442.6 | 4292.0 | 0.0 |
| 15(1) | 4(1)  | 4408.1 | 4259.2 | 0.0 |
| 15(1) | 5(1)  | 4392.4 | 4247.6 | 0.0 |
| 15(1) | 6(1)  | 3065.4 | 3006.3 | 0.0 |
| 15(1) | 7(1)  | 2889.9 | 2818.3 | 0.1 |
| 15(1) | 8(1)  | 2851.7 | 2785.7 | 0.1 |
| 15(1) | 9(1)  | 2766.0 | 2702.9 | 0.0 |
| 15(1) | 10(1) | 2718.2 | 2654.7 | 0.0 |
| 15(1) | 11(1) | 2588.9 | 2531.1 | 0.6 |
| 15(1) | 12(1) | 2569.8 | 2509.7 | 1.2 |
| 15(1) | 13(1) | 2530.1 | 2466.5 | 0.0 |
| 15(1) | 14(1) | 2510.7 | 2461.1 | 0.2 |
| 16(1) | 1(1)  | 5014.3 | 4807.5 | 0.0 |
| 16(1) | 2(1)  | 5001.1 | 4772.0 | 0.9 |
| 16(1) | 3(1)  | 4416.9 | 4259.4 | 0.0 |
| 16(1) | 4(1)  | 4382.4 | 4228.6 | 0.0 |
| 16(1) | 5(1)  | 4366.8 | 4216.1 | 0.0 |
| 16(1) | 6(1)  | 3039.8 | 2971.2 | 0.0 |
| 16(1) | 7(1)  | 2864.2 | 2787.8 | 0.0 |
| 16(1) | 8(1)  | 2826.1 | 2757.2 | 0.0 |

|       |       |        |        |     |
|-------|-------|--------|--------|-----|
| 16(1) | 9(1)  | 2740.4 | 2672.1 | 0.2 |
| 16(1) | 10(1) | 2692.5 | 2626.8 | 0.0 |
| 16(1) | 11(1) | 2563.2 | 2501.2 | 0.2 |
| 16(1) | 12(1) | 2544.2 | 2481.3 | 0.0 |
| 16(1) | 13(1) | 2504.4 | 2423.5 | 1.3 |
| 16(1) | 14(1) | 2485.1 | 2431.0 | 0.1 |
| 16(1) | 15(1) | 2430.5 | 2373.4 | 0.2 |
| 17(1) | 1(1)  | 4990.1 | 4791.5 | 0.2 |
| 17(1) | 2(1)  | 4976.9 | 4767.4 | 0.0 |
| 17(1) | 3(1)  | 4392.7 | 4240.9 | 0.0 |
| 17(1) | 4(1)  | 4358.2 | 4211.5 | 0.0 |
| 17(1) | 5(1)  | 4342.6 | 4198.2 | 0.0 |
| 17(1) | 6(1)  | 3015.6 | 2960.2 | 0.0 |
| 17(1) | 7(1)  | 2840.0 | 2772.1 | 0.1 |
| 17(1) | 8(1)  | 2801.8 | 2741.0 | 0.1 |
| 17(1) | 9(1)  | 2716.2 | 2656.5 | 0.4 |
| 17(1) | 10(1) | 2668.3 | 2610.1 | 0.1 |
| 17(1) | 11(1) | 2539.0 | 2486.5 | 0.2 |
| 17(1) | 12(1) | 2520.0 | 2464.1 | 0.7 |
| 17(1) | 13(1) | 2480.2 | 2420.6 | 0.3 |
| 17(1) | 14(1) | 2460.8 | 2416.5 | 0.3 |
| 17(1) | 15(1) | 2406.3 | 2355.4 | 0.9 |
| 17(1) | 16(1) | 2380.6 | 2327.4 | 0.0 |
| 18(1) | 1(1)  | 4962.4 | 4763.5 | 0.4 |
| 18(1) | 2(1)  | 4949.1 | 4737.9 | 0.1 |
| 18(1) | 3(1)  | 4364.9 | 4212.9 | 0.1 |
| 18(1) | 4(1)  | 4330.5 | 4184.3 | 0.0 |
| 18(1) | 5(1)  | 4314.8 | 4171.5 | 0.0 |
| 18(1) | 6(1)  | 2987.8 | 2930.8 | 0.0 |
| 18(1) | 7(1)  | 2812.3 | 2742.0 | 0.6 |
| 18(1) | 8(1)  | 2774.1 | 2712.4 | 0.1 |
| 18(1) | 9(1)  | 2688.4 | 2628.0 | 0.2 |
| 18(1) | 10(1) | 2640.5 | 2581.5 | 1.2 |
| 18(1) | 11(1) | 2511.2 | 2457.7 | 0.0 |
| 18(1) | 12(1) | 2492.2 | 2435.7 | 0.8 |
| 18(1) | 13(1) | 2452.5 | 2391.0 | 0.5 |
| 18(1) | 14(1) | 2433.1 | 2387.2 | 0.9 |
| 18(1) | 15(1) | 2378.5 | 2327.3 | 0.2 |
| 18(1) | 16(1) | 2352.9 | 2298.2 | 0.4 |
| 18(1) | 17(1) | 2328.6 | 2283.0 | 0.0 |

|       |       |        |        |     |
|-------|-------|--------|--------|-----|
| 19(1) | 1(1)  | 4883.1 | 4685.3 | 0.0 |
| 19(1) | 2(1)  | 4869.8 | 4658.9 | 0.2 |
| 19(1) | 3(1)  | 4285.6 | 4138.1 | 0.1 |
| 19(1) | 4(1)  | 4251.2 | 4106.9 | 0.1 |
| 19(1) | 5(1)  | 4235.5 | 4094.7 | 0.2 |
| 19(1) | 6(1)  | 2908.5 | 2851.0 | 0.2 |
| 19(1) | 7(1)  | 2733.0 | 2666.1 | 0.0 |
| 19(1) | 8(1)  | 2694.8 | 2634.4 | 0.0 |
| 19(1) | 9(1)  | 2609.1 | 2550.9 | 0.0 |
| 19(1) | 10(1) | 2561.2 | 2505.3 | 0.2 |
| 19(1) | 11(1) | 2432.0 | 2379.0 | 0.1 |
| 19(1) | 12(1) | 2412.9 | 2360.0 | 0.2 |
| 19(1) | 13(1) | 2373.2 | 2308.6 | 2.4 |
| 19(1) | 14(1) | 2353.8 | 2309.0 | 0.0 |
| 19(1) | 15(1) | 2299.2 | 2251.6 | 0.1 |
| 19(1) | 16(1) | 2273.6 | 2217.8 | 0.1 |
| 19(1) | 17(1) | 2249.4 | 2205.8 | 0.0 |
| 19(1) | 18(1) | 2221.6 | 2175.7 | 0.6 |
| 20(1) | 1(1)  | 4803.5 | 4611.3 | 0.0 |
| 20(1) | 2(1)  | 4790.2 | 4586.3 | 0.0 |
| 20(1) | 3(1)  | 4206.0 | 4061.6 | 0.1 |
| 20(1) | 4(1)  | 4171.6 | 4031.5 | 0.1 |
| 20(1) | 5(1)  | 4155.9 | 4019.2 | 0.3 |
| 20(1) | 6(1)  | 2828.9 | 2778.7 | 0.0 |
| 20(1) | 7(1)  | 2653.4 | 2591.3 | 0.0 |
| 20(1) | 8(1)  | 2615.2 | 2557.8 | 0.0 |
| 20(1) | 9(1)  | 2529.5 | 2475.5 | 0.4 |
| 20(1) | 10(1) | 2481.6 | 2429.4 | 0.2 |
| 20(1) | 11(1) | 2352.3 | 2305.6 | 0.3 |
| 20(1) | 12(1) | 2333.3 | 2284.4 | 0.7 |
| 20(1) | 13(1) | 2293.6 | 2239.9 | 0.2 |
| 20(1) | 14(1) | 2274.2 | 2234.5 | 0.2 |
| 20(1) | 15(1) | 2219.6 | 2176.0 | 0.1 |
| 20(1) | 16(1) | 2194.0 | 2146.0 | 0.0 |
| 20(1) | 17(1) | 2169.7 | 2131.2 | 0.1 |
| 20(1) | 18(1) | 2142.0 | 2102.3 | 0.6 |
| 20(1) | 19(1) | 2062.7 | 2024.1 | 0.3 |
| 21(1) | 1(1)  | 4777.8 | 4588.7 | 0.0 |
| 21(1) | 2(1)  | 4764.5 | 4564.6 | 0.0 |
| 21(1) | 3(1)  | 4180.3 | 4041.8 | 0.0 |

|       |       |        |        |     |
|-------|-------|--------|--------|-----|
| 21(1) | 4(1)  | 4145.9 | 4000.4 | 0.0 |
| 21(1) | 5(1)  | 4130.2 | 3991.1 | 0.0 |
| 21(1) | 6(1)  | 2803.2 | 2756.1 | 0.0 |
| 21(1) | 7(1)  | 2627.7 | 2569.6 | 0.0 |
| 21(1) | 8(1)  | 2589.5 | 2539.0 | 0.0 |
| 21(1) | 9(1)  | 2503.8 | 2454.6 | 0.0 |
| 21(1) | 10(1) | 2455.9 | 2409.0 | 0.0 |
| 21(1) | 11(1) | 2326.7 | 2284.3 | 0.0 |
| 21(1) | 12(1) | 2307.6 | 2263.7 | 0.0 |
| 21(1) | 13(1) | 2267.9 | 2217.7 | 0.0 |
| 21(1) | 14(1) | 2248.5 | 2213.6 | 0.0 |
| 21(1) | 15(1) | 2193.9 | 2155.5 | 0.0 |
| 21(1) | 16(1) | 2168.3 | 2123.6 | 0.0 |
| 21(1) | 17(1) | 2144.1 | 2108.8 | 0.0 |
| 21(1) | 18(1) | 2116.3 | 2080.6 | 0.0 |
| 21(1) | 19(1) | 2037.0 | 2002.6 | 0.1 |
| 21(1) | 20(1) | 1957.4 | 1928.1 | 0.1 |
| 22(1) | 1(1)  | 4697.1 | 4517.1 | 0.0 |
| 22(1) | 2(1)  | 4683.9 | 4492.6 | 0.0 |
| 22(1) | 3(1)  | 4099.7 | 3956.4 | 0.0 |
| 22(1) | 4(1)  | 4065.2 | 3938.4 | 0.0 |
| 22(1) | 5(1)  | 4049.6 | 3926.3 | 0.0 |
| 22(1) | 6(1)  | 2722.6 | 2684.8 | 0.0 |
| 22(1) | 7(1)  | 2547.0 | 2497.2 | 0.0 |
| 22(1) | 8(1)  | 2508.9 | 2466.4 | 0.0 |
| 22(1) | 9(1)  | 2423.2 | 2382.9 | 0.0 |
| 22(1) | 10(1) | 2375.3 | 2335.9 | 0.0 |
| 22(1) | 11(1) | 2246.0 | 2212.6 | 0.0 |
| 22(1) | 12(1) | 2227.0 | 2191.7 | 0.0 |
| 22(1) | 13(1) | 2187.2 | 2145.6 | 0.0 |
| 22(1) | 14(1) | 2167.9 | 2142.0 | 0.0 |
| 22(1) | 15(1) | 2113.3 | 2082.4 | 0.0 |
| 22(1) | 16(1) | 2087.6 | 2052.2 | 0.0 |
| 22(1) | 17(1) | 2063.4 | 2038.4 | 0.0 |
| 22(1) | 18(1) | 2035.7 | 2009.4 | 0.0 |
| 22(1) | 19(1) | 1956.4 | 1930.1 | 0.0 |
| 22(1) | 20(1) | 1876.7 | 1856.0 | 0.0 |
| 22(1) | 21(1) | 1851.1 | 1836.4 | 0.8 |
| 23(1) | 1(1)  | 4640.4 | 4455.2 | 0.0 |
| 23(1) | 2(1)  | 4627.1 | 4431.1 | 0.0 |

|       |       |        |        |     |
|-------|-------|--------|--------|-----|
| 23(1) | 3(1)  | 4043.0 | 3909.0 | 0.0 |
| 23(1) | 4(1)  | 4008.5 | 3873.4 | 0.0 |
| 23(1) | 5(1)  | 3992.8 | 3859.8 | 0.0 |
| 23(1) | 6(1)  | 2665.8 | 2622.6 | 0.0 |
| 23(1) | 7(1)  | 2490.3 | 2437.3 | 0.0 |
| 23(1) | 8(1)  | 2452.1 | 2405.4 | 0.0 |
| 23(1) | 9(1)  | 2366.4 | 2321.2 | 0.0 |
| 23(1) | 10(1) | 2318.6 | 2276.7 | 0.0 |
| 23(1) | 11(1) | 2189.3 | 2151.5 | 0.0 |
| 23(1) | 12(1) | 2170.2 | 2131.5 | 0.0 |
| 23(1) | 13(1) | 2130.5 | 2080.8 | 0.0 |
| 23(1) | 14(1) | 2111.1 | 2078.8 | 0.0 |
| 23(1) | 15(1) | 2056.6 | 2022.0 | 0.0 |
| 23(1) | 16(1) | 2030.9 | 1989.4 | 0.0 |
| 23(1) | 17(1) | 2006.7 | 1976.2 | 0.0 |
| 23(1) | 18(1) | 1978.9 | 1947.5 | 0.0 |
| 23(1) | 19(1) | 1899.6 | 1868.8 | 0.2 |
| 23(1) | 20(1) | 1820.0 | 1794.4 | 0.0 |
| 23(1) | 21(1) | 1794.3 | 1772.8 | 0.5 |
| 23(1) | 22(1) | 1713.7 | 1702.4 | 0.4 |
| 24(1) | 1(1)  | 4593.3 | 4410.0 | 0.0 |
| 24(1) | 2(1)  | 4580.1 | 4385.5 | 0.0 |
| 24(1) | 3(1)  | 3995.9 | 3862.5 | 0.0 |
| 24(1) | 4(1)  | 3961.4 | 3829.7 | 0.0 |
| 24(1) | 5(1)  | 3945.8 | 3817.5 | 0.0 |
| 24(1) | 6(1)  | 2618.8 | 2575.8 | 0.1 |
| 24(1) | 7(1)  | 2443.2 | 2391.9 | 0.1 |
| 24(1) | 8(1)  | 2405.0 | 2359.9 | 0.0 |
| 24(1) | 9(1)  | 2319.4 | 2276.0 | 0.0 |
| 24(1) | 10(1) | 2271.5 | 2229.6 | 0.0 |
| 24(1) | 11(1) | 2142.2 | 2104.9 | 0.0 |
| 24(1) | 12(1) | 2123.2 | 2085.5 | 0.0 |
| 24(1) | 13(1) | 2083.4 | 2037.4 | 0.1 |
| 24(1) | 14(1) | 2064.0 | 2035.6 | 0.0 |
| 24(1) | 15(1) | 2009.5 | 1977.7 | 0.0 |
| 24(1) | 16(1) | 1983.8 | 1941.9 | 0.2 |
| 24(1) | 17(1) | 1959.6 | 1932.1 | 0.0 |
| 24(1) | 18(1) | 1931.8 | 1901.1 | 0.0 |
| 24(1) | 19(1) | 1852.6 | 1822.3 | 0.3 |
| 24(1) | 20(1) | 1772.9 | 1748.9 | 0.1 |

|       |       |        |        |     |
|-------|-------|--------|--------|-----|
| 24(1) | 21(1) | 1747.3 | 1727.2 | 0.9 |
| 24(1) | 22(1) | 1666.6 | 1656.2 | 1.2 |
| 24(1) | 23(1) | 1609.9 | 1594.2 | 3.0 |
| 25(1) | 1(1)  | 4575.8 | 4387.9 | 0.0 |
| 25(1) | 2(1)  | 4562.6 | 4362.4 | 0.1 |
| 25(1) | 3(1)  | 3978.4 | 3840.7 | 0.1 |
| 25(1) | 4(1)  | 3943.9 | 3809.0 | 0.1 |
| 25(1) | 5(1)  | 3928.2 | 3797.1 | 0.0 |
| 25(1) | 6(1)  | 2601.3 | 2553.6 | 0.1 |
| 25(1) | 7(1)  | 2425.7 | 2369.6 | 0.5 |
| 25(1) | 8(1)  | 2387.5 | 2337.4 | 0.3 |
| 25(1) | 9(1)  | 2301.8 | 2253.9 | 0.1 |
| 25(1) | 10(1) | 2254.0 | 2207.7 | 0.1 |
| 25(1) | 11(1) | 2124.7 | 2082.5 | 0.2 |
| 25(1) | 12(1) | 2105.7 | 2061.9 | 0.1 |
| 25(1) | 13(1) | 2065.9 | 2015.3 | 0.7 |
| 25(1) | 14(1) | 2046.5 | 2011.2 | 0.1 |
| 25(1) | 15(1) | 1992.0 | 1954.1 | 0.1 |
| 25(1) | 16(1) | 1966.3 | 1923.4 | 1.9 |
| 25(1) | 17(1) | 1942.1 | 1908.4 | 0.1 |
| 25(1) | 18(1) | 1914.3 | 1880.1 | 1.8 |
| 25(1) | 19(1) | 1835.0 | 1798.7 | 0.2 |
| 25(1) | 20(1) | 1755.4 | 1726.6 | 0.1 |
| 25(1) | 21(1) | 1729.7 | 1704.7 | 0.0 |
| 25(1) | 22(1) | 1649.1 | 1633.0 | 0.0 |
| 25(1) | 23(1) | 1592.4 | 1571.3 | 0.2 |
| 25(1) | 24(1) | 1545.3 | 1525.6 | 0.0 |
| 26(1) | 1(1)  | 4564.0 | 4375.9 | 0.0 |
| 26(1) | 2(1)  | 4550.8 | 4350.2 | 0.0 |
| 26(1) | 3(1)  | 3966.6 | 3829.0 | 0.0 |
| 26(1) | 4(1)  | 3932.1 | 3796.9 | 0.1 |
| 26(1) | 5(1)  | 3916.5 | 3785.1 | 0.2 |
| 26(1) | 6(1)  | 2589.5 | 2541.6 | 0.0 |
| 26(1) | 7(1)  | 2413.9 | 2357.2 | 0.3 |
| 26(1) | 8(1)  | 2375.8 | 2325.2 | 0.3 |
| 26(1) | 9(1)  | 2290.1 | 2241.0 | 0.2 |
| 26(1) | 10(1) | 2242.2 | 2195.3 | 0.1 |
| 26(1) | 11(1) | 2112.9 | 2070.4 | 0.2 |
| 26(1) | 12(1) | 2093.9 | 2049.7 | 0.7 |
| 26(1) | 13(1) | 2054.1 | 2003.0 | 0.3 |



|       |       |        |        |      |
|-------|-------|--------|--------|------|
| 26(1) | 14(1) | 2034.8 | 1999.9 | 0.1  |
| 26(1) | 15(1) | 1980.2 | 1942.0 | 0.4  |
| 26(1) | 16(1) | 1954.5 | 1910.9 | 1.4  |
| 26(1) | 17(1) | 1930.3 | 1895.7 | 0.5  |
| 26(1) | 18(1) | 1902.6 | 1867.1 | 0.0  |
| 26(1) | 19(1) | 1823.3 | 1787.4 | 7.0  |
| 26(1) | 20(1) | 1743.7 | 1714.6 | 0.0  |
| 26(1) | 21(1) | 1718.0 | 1692.5 | 0.0  |
| 26(1) | 22(1) | 1637.3 | 1620.9 | 0.0  |
| 26(1) | 23(1) | 1580.6 | 1559.2 | 0.0  |
| 26(1) | 24(1) | 1533.5 | 1513.4 | 0.2  |
| 26(1) | 25(1) | 1516.0 | 1490.9 | 0.3  |
| 27(1) | 1(1)  | 4522.0 | 4339.4 | 0.0  |
| 27(1) | 2(1)  | 4508.7 | 4314.9 | 0.0  |
| 27(1) | 3(1)  | 3924.5 | 3791.4 | 0.0  |
| 27(1) | 4(1)  | 3890.1 | 3760.4 | 0.0  |
| 27(1) | 5(1)  | 3874.4 | 3748.3 | 0.0  |
| 27(1) | 6(1)  | 2547.4 | 2505.5 | 0.0  |
| 27(1) | 7(1)  | 2371.9 | 2320.5 | 0.0  |
| 27(1) | 8(1)  | 2333.7 | 2288.7 | 0.0  |
| 27(1) | 9(1)  | 2248.0 | 2205.0 | 0.0  |
| 27(1) | 10(1) | 2200.1 | 2158.6 | 0.0  |
| 27(1) | 11(1) | 2070.9 | 2034.2 | 0.0  |
| 27(1) | 12(1) | 2051.8 | 2014.1 | 0.0  |
| 27(1) | 13(1) | 2012.1 | 1968.4 | 0.0  |
| 27(1) | 14(1) | 1992.7 | 1963.2 | 0.0  |
| 27(1) | 15(1) | 1938.1 | 1906.1 | 0.0  |
| 27(1) | 16(1) | 1912.5 | 1873.6 | 0.3  |
| 27(1) | 17(1) | 1888.3 | 1858.2 | 0.0  |
| 27(1) | 18(1) | 1860.5 | 1830.6 | 0.2  |
| 27(1) | 19(1) | 1781.2 | 1751.2 | 1.2  |
| 27(1) | 20(1) | 1701.6 | 1678.1 | 0.3  |
| 27(1) | 21(1) | 1675.9 | 1657.5 | 0.0  |
| 27(1) | 22(1) | 1595.3 | 1585.7 | 1.1  |
| 27(1) | 23(1) | 1538.5 | 1523.4 | 0.2  |
| 27(1) | 24(1) | 1491.5 | 1478.8 | 34.1 |
| 27(1) | 25(1) | 1473.9 | 1454.5 | 1.0  |
| 27(1) | 26(1) | 1462.2 | 1442.8 | 0.2  |
| 28(1) | 1(1)  | 4462.0 | 4277.4 | 0.0  |
| 28(1) | 2(1)  | 4448.8 | 4252.8 | 0.0  |

|       |       |        |        |      |
|-------|-------|--------|--------|------|
| 28(1) | 3(1)  | 3864.6 | 3730.2 | 0.0  |
| 28(1) | 4(1)  | 3830.1 | 3698.1 | 0.0  |
| 28(1) | 5(1)  | 3814.5 | 3685.7 | 0.0  |
| 28(1) | 6(1)  | 2487.5 | 2444.8 | 0.0  |
| 28(1) | 7(1)  | 2311.9 | 2259.1 | 0.0  |
| 28(1) | 8(1)  | 2273.7 | 2227.1 | 0.0  |
| 28(1) | 9(1)  | 2188.1 | 2142.7 | 0.0  |
| 28(1) | 10(1) | 2140.2 | 2097.4 | 0.0  |
| 28(1) | 11(1) | 2010.9 | 1973.0 | 0.0  |
| 28(1) | 12(1) | 1991.9 | 1951.3 | 0.0  |
| 28(1) | 13(1) | 1952.1 | 1906.5 | 0.0  |
| 28(1) | 14(1) | 1932.7 | 1901.3 | 0.0  |
| 28(1) | 15(1) | 1878.2 | 1844.2 | 0.0  |
| 28(1) | 16(1) | 1852.5 | 1813.0 | 2.4  |
| 28(1) | 17(1) | 1828.3 | 1798.4 | 0.2  |
| 28(1) | 18(1) | 1800.5 | 1769.7 | 0.1  |
| 28(1) | 19(1) | 1721.3 | 1690.5 | 0.1  |
| 28(1) | 20(1) | 1641.6 | 1615.1 | 0.1  |
| 28(1) | 21(1) | 1616.0 | 1593.4 | 4.9  |
| 28(1) | 22(1) | 1535.3 | 1526.8 | 0.2  |
| 28(1) | 23(1) | 1478.6 | 1460.1 | 6.4  |
| 28(1) | 24(1) | 1431.5 | 1415.9 | 0.3  |
| 28(1) | 25(1) | 1414.0 | 1393.1 | 0.2  |
| 28(1) | 26(1) | 1402.2 | 1381.0 | 0.2  |
| 28(1) | 27(1) | 1360.2 | 1344.6 | 28.7 |
| 29(1) | 1(1)  | 4412.5 | 4230.3 | 0.0  |
| 29(1) | 2(1)  | 4399.3 | 4204.4 | 0.1  |
| 29(1) | 3(1)  | 3815.1 | 3683.2 | 0.0  |
| 29(1) | 4(1)  | 3780.6 | 3651.6 | 0.0  |
| 29(1) | 5(1)  | 3764.9 | 3639.5 | 0.0  |
| 29(1) | 6(1)  | 2437.9 | 2395.8 | 0.0  |
| 29(1) | 7(1)  | 2262.4 | 2211.4 | 0.0  |
| 29(1) | 8(1)  | 2224.2 | 2179.7 | 0.0  |
| 29(1) | 9(1)  | 2138.5 | 2095.6 | 0.1  |
| 29(1) | 10(1) | 2090.7 | 2050.2 | 0.0  |
| 29(1) | 11(1) | 1961.4 | 1925.3 | 0.1  |
| 29(1) | 12(1) | 1942.4 | 1903.7 | 0.1  |
| 29(1) | 13(1) | 1902.6 | 1857.9 | 0.1  |
| 29(1) | 14(1) | 1883.2 | 1854.0 | 0.0  |
| 29(1) | 15(1) | 1828.7 | 1796.7 | 3.0  |

|       |       |        |        |      |
|-------|-------|--------|--------|------|
| 29(1) | 16(1) | 1803.0 | 1766.8 | 2.7  |
| 29(1) | 17(1) | 1778.8 | 1750.6 | 0.3  |
| 29(1) | 18(1) | 1751.0 | 1721.7 | 0.3  |
| 29(1) | 19(1) | 1671.7 | 1642.9 | 7.6  |
| 29(1) | 20(1) | 1592.1 | 1569.0 | 1.1  |
| 29(1) | 21(1) | 1566.4 | 1546.9 | 0.1  |
| 29(1) | 22(1) | 1485.8 | 1475.2 | 2.7  |
| 29(1) | 23(1) | 1429.1 | 1413.9 | 0.0  |
| 29(1) | 24(1) | 1382.0 | 1368.4 | 0.3  |
| 29(1) | 25(1) | 1364.5 | 1346.4 | 1.7  |
| 29(1) | 26(1) | 1352.7 | 1334.6 | 13.8 |
| 29(1) | 27(1) | 1310.6 | 1297.4 | 2.2  |
| 29(1) | 28(1) | 1250.7 | 1235.5 | 0.0  |
| 30(1) | 1(1)  | 4396.0 | 4212.3 | 0.0  |
| 30(1) | 2(1)  | 4382.7 | 4186.8 | 0.0  |
| 30(1) | 3(1)  | 3798.5 | 3665.2 | 0.0  |
| 30(1) | 4(1)  | 3764.1 | 3633.8 | 0.0  |
| 30(1) | 5(1)  | 3748.4 | 3621.7 | 0.0  |
| 30(1) | 6(1)  | 2421.4 | 2379.9 | 0.0  |
| 30(1) | 7(1)  | 2245.9 | 2193.6 | 0.0  |
| 30(1) | 8(1)  | 2207.7 | 2162.3 | 0.0  |
| 30(1) | 9(1)  | 2122.0 | 2077.2 | 0.0  |
| 30(1) | 10(1) | 2074.1 | 2032.2 | 0.0  |
| 30(1) | 11(1) | 1944.8 | 1907.1 | 0.0  |
| 30(1) | 12(1) | 1925.8 | 1886.8 | 0.1  |
| 30(1) | 13(1) | 1886.1 | 1839.9 | 0.0  |
| 30(1) | 14(1) | 1866.7 | 1835.8 | 0.0  |
| 30(1) | 15(1) | 1812.1 | 1778.2 | 0.6  |
| 30(1) | 16(1) | 1786.5 | 1746.9 | 1.8  |
| 30(1) | 17(1) | 1762.2 | 1732.4 | 0.1  |
| 30(1) | 18(1) | 1734.5 | 1703.6 | 0.1  |
| 30(1) | 19(1) | 1655.2 | 1625.4 | 0.4  |
| 30(1) | 20(1) | 1575.6 | 1550.7 | 1.3  |
| 30(1) | 21(1) | 1549.9 | 1529.0 | 0.0  |
| 30(1) | 22(1) | 1469.2 | 1457.3 | 1.3  |
| 30(1) | 23(1) | 1412.5 | 1396.0 | 0.1  |
| 30(1) | 24(1) | 1365.4 | 1351.0 | 3.6  |
| 30(1) | 25(1) | 1347.9 | 1327.4 | 3.3  |
| 30(1) | 26(1) | 1336.2 | 1314.7 | 8.1  |
| 30(1) | 27(1) | 1294.1 | 1280.4 | 0.0  |

|       |       |        |        |      |
|-------|-------|--------|--------|------|
| 30(1) | 28(1) | 1234.1 | 1217.6 | 0.2  |
| 30(1) | 29(1) | 1184.6 | 1170.2 | 3.1  |
| 31(1) | 1(1)  | 4337.4 | 4155.9 | 0.0  |
| 31(1) | 2(1)  | 4324.1 | 4131.3 | 0.0  |
| 31(1) | 3(1)  | 3739.9 | 3609.2 | 0.0  |
| 31(1) | 4(1)  | 3705.5 | 3577.4 | 0.0  |
| 31(1) | 5(1)  | 3689.8 | 3565.3 | 0.0  |
| 31(1) | 6(1)  | 2362.8 | 2323.8 | 0.0  |
| 31(1) | 7(1)  | 2187.3 | 2135.4 | 0.2  |
| 31(1) | 8(1)  | 2149.1 | 2106.0 | 0.0  |
| 31(1) | 9(1)  | 2063.4 | 2021.8 | 0.0  |
| 31(1) | 10(1) | 2015.5 | 1974.2 | 0.1  |
| 31(1) | 11(1) | 1886.3 | 1850.9 | 0.1  |
| 31(1) | 12(1) | 1867.2 | 1830.6 | 0.2  |
| 31(1) | 13(1) | 1827.5 | 1784.0 | 12.4 |
| 31(1) | 14(1) | 1808.1 | 1780.1 | 0.1  |
| 31(1) | 15(1) | 1753.5 | 1721.9 | 0.3  |
| 31(1) | 16(1) | 1727.9 | 1691.1 | 0.3  |
| 31(1) | 17(1) | 1703.7 | 1677.2 | 0.8  |
| 31(1) | 18(1) | 1675.9 | 1649.9 | 21.9 |
| 31(1) | 19(1) | 1596.6 | 1568.7 | 0.6  |
| 31(1) | 20(1) | 1517.0 | 1495.5 | 4.7  |
| 31(1) | 21(1) | 1491.3 | 1472.8 | 0.0  |
| 31(1) | 22(1) | 1410.7 | 1401.1 | 0.0  |
| 31(1) | 23(1) | 1353.9 | 1339.6 | 0.1  |
| 31(1) | 24(1) | 1306.9 | 1294.0 | 0.1  |
| 31(1) | 25(1) | 1289.4 | 1271.9 | 5.5  |
| 31(1) | 26(1) | 1277.6 | 1258.8 | 4.7  |
| 31(1) | 27(1) | 1235.5 | 1223.3 | 0.1  |
| 31(1) | 28(1) | 1175.6 | 1160.8 | 4.8  |
| 31(1) | 29(1) | 1126.1 | 1114.2 | 0.0  |
| 31(1) | 30(1) | 1109.5 | 1096.3 | 0.5  |
| 32(1) | 1(1)  | 4310.3 | 4090.7 | 0.0  |
| 32(1) | 2(1)  | 4297.1 | 4056.6 | 1.4  |
| 32(1) | 3(1)  | 3712.9 | 3544.0 | 0.0  |
| 32(1) | 4(1)  | 3678.4 | 3511.7 | 0.1  |
| 32(1) | 5(1)  | 3662.8 | 3499.8 | 0.1  |
| 32(1) | 6(1)  | 2335.8 | 2256.9 | 0.0  |
| 32(1) | 7(1)  | 2160.2 | 2073.3 | 0.0  |
| 32(1) | 8(1)  | 2122.1 | 2041.1 | 0.0  |

|       |       |        |        |      |
|-------|-------|--------|--------|------|
| 32(1) | 9(1)  | 2036.4 | 1957.2 | 0.0  |
| 32(1) | 10(1) | 1988.5 | 1910.9 | 0.0  |
| 32(1) | 11(1) | 1859.2 | 1786.5 | 0.2  |
| 32(1) | 12(1) | 1840.2 | 1766.0 | 4.7  |
| 32(1) | 13(1) | 1800.5 | 1714.4 | 1.8  |
| 32(1) | 14(1) | 1781.1 | 1715.6 | 0.1  |
| 32(1) | 15(1) | 1726.5 | 1657.7 | 0.1  |
| 32(1) | 16(1) | 1700.8 | 1629.7 | 0.3  |
| 32(1) | 17(1) | 1676.6 | 1612.1 | 0.1  |
| 32(1) | 18(1) | 1648.9 | 1584.1 | 0.7  |
| 32(1) | 19(1) | 1569.6 | 1506.1 | 0.3  |
| 32(1) | 20(1) | 1490.0 | 1429.0 | 0.1  |
| 32(1) | 21(1) | 1464.3 | 1405.5 | 0.3  |
| 32(1) | 22(1) | 1383.6 | 1335.9 | 0.0  |
| 32(1) | 23(1) | 1326.9 | 1278.4 | 66.5 |
| 32(1) | 24(1) | 1279.8 | 1226.2 | 5.1  |
| 32(1) | 25(1) | 1262.3 | 1206.3 | 2.2  |
| 32(1) | 26(1) | 1250.5 | 1194.3 | 0.7  |
| 32(1) | 27(1) | 1208.5 | 1149.9 | 9.2  |
| 32(1) | 28(1) | 1148.5 | 1095.9 | 1.7  |
| 32(1) | 29(1) | 1099.0 | 1049.3 | 0.4  |
| 32(1) | 30(1) | 1082.5 | 1030.2 | 0.1  |
| 32(1) | 31(1) | 1023.9 | 974.4  | 0.0  |
| 33(1) | 1(1)  | 4285.8 | 4103.0 | 0.0  |
| 33(1) | 2(1)  | 4272.5 | 4078.5 | 0.0  |
| 33(1) | 3(1)  | 3688.3 | 3556.0 | 0.0  |
| 33(1) | 4(1)  | 3653.9 | 3524.0 | 0.0  |
| 33(1) | 5(1)  | 3638.2 | 3512.0 | 0.0  |
| 33(1) | 6(1)  | 2311.2 | 2270.3 | 0.0  |
| 33(1) | 7(1)  | 2135.7 | 2084.3 | 0.0  |
| 33(1) | 8(1)  | 2097.5 | 2052.6 | 0.0  |
| 33(1) | 9(1)  | 2011.8 | 1968.6 | 0.0  |
| 33(1) | 10(1) | 1963.9 | 1923.3 | 0.0  |
| 33(1) | 11(1) | 1834.6 | 1797.3 | 0.0  |
| 33(1) | 12(1) | 1815.6 | 1778.2 | 0.0  |
| 33(1) | 13(1) | 1775.9 | 1731.7 | 0.1  |
| 33(1) | 14(1) | 1756.5 | 1726.0 | 0.0  |
| 33(1) | 15(1) | 1701.9 | 1669.4 | 0.0  |
| 33(1) | 16(1) | 1676.3 | 1638.4 | 0.6  |
| 33(1) | 17(1) | 1652.1 | 1621.7 | 1.5  |

|       |       |        |        |     |
|-------|-------|--------|--------|-----|
| 33(1) | 18(1) | 1624.3 | 1594.7 | 0.0 |
| 33(1) | 19(1) | 1545.0 | 1516.4 | 0.3 |
| 33(1) | 20(1) | 1465.4 | 1441.6 | 0.1 |
| 33(1) | 21(1) | 1439.7 | 1418.9 | 0.9 |
| 33(1) | 22(1) | 1359.1 | 1347.8 | 1.0 |
| 33(1) | 23(1) | 1302.3 | 1287.1 | 1.5 |
| 33(1) | 24(1) | 1255.2 | 1240.1 | 0.7 |
| 33(1) | 25(1) | 1237.7 | 1218.4 | 0.0 |
| 33(1) | 26(1) | 1226.0 | 1206.9 | 0.2 |
| 33(1) | 27(1) | 1183.9 | 1172.5 | 3.4 |
| 33(1) | 28(1) | 1123.9 | 1107.2 | 3.6 |
| 33(1) | 29(1) | 1074.4 | 1060.9 | 3.1 |
| 33(1) | 30(1) | 1057.9 | 1043.0 | 1.9 |
| 33(1) | 31(1) | 999.3  | 986.9  | 0.6 |
| 33(1) | 32(1) | 972.3  | 921.4  | 0.1 |
| 34(1) | 1(1)  | 4242.9 | 4061.8 | 0.0 |
| 34(1) | 2(1)  | 4229.7 | 4036.8 | 0.0 |
| 34(1) | 3(1)  | 3645.5 | 3515.0 | 0.0 |
| 34(1) | 4(1)  | 3611.0 | 3483.1 | 0.0 |
| 34(1) | 5(1)  | 3595.4 | 3471.1 | 0.0 |
| 34(1) | 6(1)  | 2268.4 | 2228.2 | 0.0 |
| 34(1) | 7(1)  | 2092.8 | 2043.7 | 0.0 |
| 34(1) | 8(1)  | 2054.7 | 2011.7 | 0.0 |
| 34(1) | 9(1)  | 1969.0 | 1927.7 | 0.0 |
| 34(1) | 10(1) | 1921.1 | 1881.6 | 0.1 |
| 34(1) | 11(1) | 1791.8 | 1757.7 | 0.9 |
| 34(1) | 12(1) | 1772.8 | 1736.5 | 0.1 |
| 34(1) | 13(1) | 1733.0 | 1690.2 | 1.1 |
| 34(1) | 14(1) | 1713.7 | 1685.7 | 0.1 |
| 34(1) | 15(1) | 1659.1 | 1628.5 | 0.1 |
| 34(1) | 16(1) | 1633.4 | 1597.1 | 0.2 |
| 34(1) | 17(1) | 1609.2 | 1582.1 | 2.7 |
| 34(1) | 18(1) | 1581.5 | 1553.9 | 0.0 |
| 34(1) | 19(1) | 1502.2 | 1474.8 | 0.9 |
| 34(1) | 20(1) | 1422.6 | 1400.9 | 0.2 |
| 34(1) | 21(1) | 1396.9 | 1378.8 | 0.8 |
| 34(1) | 22(1) | 1316.2 | 1307.1 | 0.1 |
| 34(1) | 23(1) | 1259.5 | 1245.5 | 2.3 |
| 34(1) | 24(1) | 1212.4 | 1199.6 | 1.0 |
| 34(1) | 25(1) | 1194.9 | 1177.0 | 0.2 |

|       |       |        |        |       |
|-------|-------|--------|--------|-------|
| 34(1) | 26(1) | 1183.1 | 1165.4 | 5.5   |
| 34(1) | 27(1) | 1141.1 | 1128.0 | 2.5   |
| 34(1) | 28(1) | 1081.1 | 1067.0 | 0.1   |
| 34(1) | 29(1) | 1031.6 | 1019.9 | 0.0   |
| 34(1) | 30(1) | 1015.1 | 1002.2 | 0.1   |
| 34(1) | 31(1) | 956.5  | 945.7  | 0.1   |
| 34(1) | 32(1) | 929.4  | 876.9  | 0.9   |
| 34(1) | 33(1) | 904.9  | 891.8  | 0.1   |
| 35(1) | 1(1)  | 4197.1 | 4013.1 | 1.4   |
| 35(1) | 2(1)  | 4183.8 | 3986.7 | 0.0   |
| 35(1) | 3(1)  | 3599.7 | 3465.0 | 0.0   |
| 35(1) | 4(1)  | 3565.2 | 3434.2 | 0.0   |
| 35(1) | 5(1)  | 3549.5 | 3423.2 | 0.0   |
| 35(1) | 6(1)  | 2222.5 | 2179.5 | 0.0   |
| 35(1) | 7(1)  | 2047.0 | 1993.3 | 0.0   |
| 35(1) | 8(1)  | 2008.8 | 1960.9 | 0.0   |
| 35(1) | 9(1)  | 1923.1 | 1877.6 | 0.0   |
| 35(1) | 10(1) | 1875.3 | 1829.4 | 0.0   |
| 35(1) | 11(1) | 1746.0 | 1707.8 | 0.0   |
| 35(1) | 12(1) | 1726.9 | 1682.2 | 0.0   |
| 35(1) | 13(1) | 1687.2 | 1639.9 | 0.0   |
| 35(1) | 14(1) | 1667.8 | 1635.9 | 0.2   |
| 35(1) | 15(1) | 1613.3 | 1585.1 | 0.0   |
| 35(1) | 16(1) | 1587.6 | 1546.2 | 0.0   |
| 35(1) | 17(1) | 1563.4 | 1534.3 | 0.0   |
| 35(1) | 18(1) | 1535.6 | 1502.4 | 0.0   |
| 35(1) | 19(1) | 1456.3 | 1425.5 | 0.0   |
| 35(1) | 20(1) | 1376.7 | 1350.6 | 0.0   |
| 35(1) | 21(1) | 1351.0 | 1330.2 | 2.4   |
| 35(1) | 22(1) | 1270.4 | 1260.0 | 0.5   |
| 35(1) | 23(1) | 1213.7 | 1191.2 | 3.0   |
| 35(1) | 24(1) | 1166.6 | 1149.4 | 2.7   |
| 35(1) | 25(1) | 1149.1 | 1124.6 | 111.7 |
| 35(1) | 26(1) | 1137.3 | 1111.3 | 0.0   |
| 35(1) | 27(1) | 1095.2 | 1078.9 | 0.8   |
| 35(1) | 28(1) | 1035.3 | 1014.5 | 2.2   |
| 35(1) | 29(1) | 985.8  | 969.7  | 0.2   |
| 35(1) | 30(1) | 969.2  | 951.4  | 0.1   |
| 35(1) | 31(1) | 910.6  | 895.1  | 0.1   |
| 35(1) | 32(1) | 883.6  | 829.1  | 0.0   |

|       |       |        |        |      |
|-------|-------|--------|--------|------|
| 35(1) | 33(1) | 859.0  | 841.7  | 0.3  |
| 35(1) | 34(1) | 816.2  | 800.7  | 0.2  |
| 36(1) | 1(1)  | 4174.5 | 3994.6 | 0.0  |
| 36(1) | 2(1)  | 4161.3 | 3970.0 | 0.0  |
| 36(1) | 3(1)  | 3577.1 | 3448.1 | 0.0  |
| 36(1) | 4(1)  | 3542.6 | 3416.2 | 0.0  |
| 36(1) | 5(1)  | 3527.0 | 3404.1 | 0.0  |
| 36(1) | 6(1)  | 2200.0 | 2162.0 | 0.1  |
| 36(1) | 7(1)  | 2024.4 | 1974.9 | 0.2  |
| 36(1) | 8(1)  | 1986.2 | 1945.0 | 0.0  |
| 36(1) | 9(1)  | 1900.6 | 1860.4 | 0.1  |
| 36(1) | 10(1) | 1852.7 | 1814.8 | 0.2  |
| 36(1) | 11(1) | 1723.4 | 1691.1 | 3.9  |
| 36(1) | 12(1) | 1704.4 | 1669.0 | 0.1  |
| 36(1) | 13(1) | 1664.6 | 1624.0 | 69.1 |
| 36(1) | 14(1) | 1645.2 | 1618.8 | 0.4  |
| 36(1) | 15(1) | 1590.7 | 1560.8 | 0.9  |
| 36(1) | 16(1) | 1565.0 | 1530.6 | 0.4  |
| 36(1) | 17(1) | 1540.8 | 1515.5 | 0.1  |
| 36(1) | 18(1) | 1513.0 | 1487.0 | 0.8  |
| 36(1) | 19(1) | 1433.8 | 1407.8 | 0.4  |
| 36(1) | 20(1) | 1354.1 | 1337.3 | 1.9  |
| 36(1) | 21(1) | 1328.5 | 1311.5 | 0.0  |
| 36(1) | 22(1) | 1247.8 | 1240.1 | 0.0  |
| 36(1) | 23(1) | 1191.1 | 1178.5 | 0.1  |
| 36(1) | 24(1) | 1144.0 | 1132.5 | 0.8  |
| 36(1) | 25(1) | 1126.5 | 1109.9 | 1.7  |
| 36(1) | 26(1) | 1114.7 | 1098.2 | 0.2  |
| 36(1) | 27(1) | 1072.7 | 1061.9 | 0.0  |
| 36(1) | 28(1) | 1012.7 | 1000.1 | 0.0  |
| 36(1) | 29(1) | 963.2  | 952.8  | 0.0  |
| 36(1) | 30(1) | 946.6  | 934.8  | 0.0  |
| 36(1) | 31(1) | 888.1  | 878.8  | 0.0  |
| 36(1) | 32(1) | 861.0  | 813.6  | 0.1  |
| 36(1) | 33(1) | 836.4  | 825.7  | 0.0  |
| 36(1) | 34(1) | 793.6  | 785.0  | 0.0  |
| 36(1) | 35(1) | 747.8  | 734.3  | 0.0  |
| 37(1) | 1(1)  | 4120.5 | 3941.3 | 0.0  |
| 37(1) | 2(1)  | 4107.2 | 3916.1 | 0.0  |
| 37(1) | 3(1)  | 3523.1 | 3394.4 | 0.0  |



|       |       |        |        |       |
|-------|-------|--------|--------|-------|
| 37(1) | 4(1)  | 3488.6 | 3362.8 | 0.0   |
| 37(1) | 5(1)  | 3472.9 | 3350.7 | 0.0   |
| 37(1) | 6(1)  | 2145.9 | 2108.6 | 0.1   |
| 37(1) | 7(1)  | 1970.4 | 1924.1 | 0.0   |
| 37(1) | 8(1)  | 1932.2 | 1891.2 | 0.1   |
| 37(1) | 9(1)  | 1846.5 | 1807.6 | 9.9   |
| 37(1) | 10(1) | 1798.7 | 1761.0 | 0.1   |
| 37(1) | 11(1) | 1669.4 | 1638.5 | 1.3   |
| 37(1) | 12(1) | 1650.3 | 1615.2 | 12.7  |
| 37(1) | 13(1) | 1610.6 | 1570.1 | 0.4   |
| 37(1) | 14(1) | 1591.2 | 1565.1 | 0.3   |
| 37(1) | 15(1) | 1536.7 | 1507.9 | 0.1   |
| 37(1) | 16(1) | 1511.0 | 1476.3 | 0.9   |
| 37(1) | 17(1) | 1486.8 | 1463.3 | 0.1   |
| 37(1) | 18(1) | 1459.0 | 1432.9 | 0.1   |
| 37(1) | 19(1) | 1379.7 | 1354.5 | 0.1   |
| 37(1) | 20(1) | 1300.1 | 1279.2 | 187.8 |
| 37(1) | 21(1) | 1274.4 | 1257.8 | 1.4   |
| 37(1) | 22(1) | 1193.8 | 1186.5 | 0.1   |
| 37(1) | 23(1) | 1137.1 | 1124.8 | 0.1   |
| 37(1) | 24(1) | 1090.0 | 1079.0 | 0.2   |
| 37(1) | 25(1) | 1072.5 | 1056.6 | 0.2   |
| 37(1) | 26(1) | 1060.7 | 1044.5 | 0.0   |
| 37(1) | 27(1) | 1018.6 | 1008.6 | 0.0   |
| 37(1) | 28(1) | 958.7  | 946.3  | 0.0   |
| 37(1) | 29(1) | 909.2  | 899.1  | 0.0   |
| 37(1) | 30(1) | 892.6  | 881.0  | 0.0   |
| 37(1) | 31(1) | 834.0  | 825.2  | 0.0   |
| 37(1) | 32(1) | 807.0  | 760.6  | 0.1   |
| 37(1) | 33(1) | 782.4  | 772.0  | 0.0   |
| 37(1) | 34(1) | 739.6  | 731.2  | 0.0   |
| 37(1) | 35(1) | 693.8  | 680.3  | 0.0   |
| 37(1) | 36(1) | 671.2  | 663.6  | 0.0   |
| 38(1) | 1(1)  | 4079.2 | 3900.8 | 0.0   |
| 38(1) | 2(1)  | 4065.9 | 3875.8 | 0.1   |
| 38(1) | 3(1)  | 3481.8 | 3353.9 | 0.0   |
| 38(1) | 4(1)  | 3447.3 | 3322.2 | 0.0   |
| 38(1) | 5(1)  | 3431.6 | 3310.2 | 0.0   |
| 38(1) | 6(1)  | 2104.6 | 2068.4 | 0.1   |
| 38(1) | 7(1)  | 1929.1 | 1882.9 | 0.0   |

|       |       |        |        |      |
|-------|-------|--------|--------|------|
| 38(1) | 8(1)  | 1890.9 | 1850.4 | 0.0  |
| 38(1) | 9(1)  | 1805.2 | 1766.8 | 0.1  |
| 38(1) | 10(1) | 1757.4 | 1720.8 | 0.0  |
| 38(1) | 11(1) | 1628.1 | 1596.6 | 11.1 |
| 38(1) | 12(1) | 1609.1 | 1575.5 | 0.0  |
| 38(1) | 13(1) | 1569.3 | 1529.4 | 0.1  |
| 38(1) | 14(1) | 1549.9 | 1524.9 | 0.0  |
| 38(1) | 15(1) | 1495.4 | 1466.9 | 0.1  |
| 38(1) | 16(1) | 1469.7 | 1436.1 | 0.1  |
| 38(1) | 17(1) | 1445.5 | 1421.1 | 0.1  |
| 38(1) | 18(1) | 1417.7 | 1392.3 | 0.1  |
| 38(1) | 19(1) | 1338.4 | 1314.4 | 0.4  |
| 38(1) | 20(1) | 1258.8 | 1239.5 | 0.2  |
| 38(1) | 21(1) | 1233.1 | 1218.1 | 1.0  |
| 38(1) | 22(1) | 1152.5 | 1145.8 | 0.3  |
| 38(1) | 23(1) | 1095.8 | 1084.2 | 0.3  |
| 38(1) | 24(1) | 1048.7 | 1038.4 | 0.6  |
| 38(1) | 25(1) | 1031.2 | 1016.6 | 0.1  |
| 38(1) | 26(1) | 1019.4 | 1004.9 | 0.1  |
| 38(1) | 27(1) | 977.3  | 968.7  | 0.7  |
| 38(1) | 28(1) | 917.4  | 906.3  | 0.2  |
| 38(1) | 29(1) | 867.9  | 858.6  | 0.0  |
| 38(1) | 30(1) | 851.3  | 840.0  | 0.0  |
| 38(1) | 31(1) | 792.8  | 783.8  | 0.3  |
| 38(1) | 32(1) | 765.7  | 721.2  | 0.9  |
| 38(1) | 33(1) | 741.1  | 731.4  | 0.5  |
| 38(1) | 34(1) | 698.3  | 691.3  | 0.0  |
| 38(1) | 35(1) | 652.5  | 641.3  | 0.3  |
| 38(1) | 36(1) | 629.9  | 623.1  | 0.0  |
| 38(1) | 37(1) | 575.9  | 569.1  | 0.0  |
| 39(1) | 1(1)  | 4039.6 | 3862.1 | 0.1  |
| 39(1) | 2(1)  | 4026.3 | 3837.2 | 0.0  |
| 39(1) | 3(1)  | 3442.1 | 3315.0 | 0.0  |
| 39(1) | 4(1)  | 3407.7 | 3283.4 | 0.0  |
| 39(1) | 5(1)  | 3392.0 | 3271.4 | 0.0  |
| 39(1) | 6(1)  | 2065.0 | 2029.3 | 0.0  |
| 39(1) | 7(1)  | 1889.5 | 1843.7 | 0.0  |
| 39(1) | 8(1)  | 1851.3 | 1812.2 | 0.0  |
| 39(1) | 9(1)  | 1765.6 | 1728.1 | 0.0  |
| 39(1) | 10(1) | 1717.7 | 1681.9 | 0.1  |

|       |       |        |        |      |
|-------|-------|--------|--------|------|
| 39(1) | 11(1) | 1588.4 | 1557.4 | 0.0  |
| 39(1) | 12(1) | 1569.4 | 1536.6 | 0.1  |
| 39(1) | 13(1) | 1529.7 | 1490.5 | 0.0  |
| 39(1) | 14(1) | 1510.3 | 1485.8 | 0.0  |
| 39(1) | 15(1) | 1455.7 | 1428.2 | 0.1  |
| 39(1) | 16(1) | 1430.1 | 1397.0 | 0.0  |
| 39(1) | 17(1) | 1405.8 | 1382.6 | 0.0  |
| 39(1) | 18(1) | 1378.1 | 1353.7 | 0.0  |
| 39(1) | 19(1) | 1298.8 | 1275.1 | 9.3  |
| 39(1) | 20(1) | 1219.2 | 1200.8 | 0.0  |
| 39(1) | 21(1) | 1193.5 | 1178.7 | 0.1  |
| 39(1) | 22(1) | 1112.9 | 1107.7 | 0.1  |
| 39(1) | 23(1) | 1056.1 | 1045.5 | 0.1  |
| 39(1) | 24(1) | 1009.0 | 1000.1 | 0.0  |
| 39(1) | 25(1) | 991.5  | 977.7  | 0.0  |
| 39(1) | 26(1) | 979.8  | 965.6  | 0.0  |
| 39(1) | 27(1) | 937.7  | 929.5  | 0.0  |
| 39(1) | 28(1) | 877.7  | 866.8  | 0.0  |
| 39(1) | 29(1) | 828.2  | 820.1  | 0.0  |
| 39(1) | 30(1) | 811.7  | 802.3  | 0.0  |
| 39(1) | 31(1) | 753.1  | 747.2  | 2.4  |
| 39(1) | 32(1) | 726.1  | 680.8  | 0.0  |
| 39(1) | 33(1) | 701.5  | 692.6  | 0.0  |
| 39(1) | 34(1) | 658.7  | 651.6  | 0.2  |
| 39(1) | 35(1) | 612.8  | 601.1  | 0.4  |
| 39(1) | 36(1) | 590.2  | 584.0  | 0.0  |
| 39(1) | 37(1) | 536.2  | 530.7  | 0.0  |
| 39(1) | 38(1) | 494.9  | 490.7  | 0.0  |
| 40(1) | 1(1)  | 3990.3 | 3813.2 | 0.0  |
| 40(1) | 2(1)  | 3977.0 | 3787.7 | 0.0  |
| 40(1) | 3(1)  | 3392.9 | 3266.3 | 0.0  |
| 40(1) | 4(1)  | 3358.4 | 3235.0 | 0.0  |
| 40(1) | 5(1)  | 3342.7 | 3222.7 | 0.0  |
| 40(1) | 6(1)  | 2015.7 | 1980.4 | 0.2  |
| 40(1) | 7(1)  | 1840.2 | 1794.6 | 12.1 |
| 40(1) | 8(1)  | 1802.0 | 1763.5 | 0.2  |
| 40(1) | 9(1)  | 1716.3 | 1679.0 | 0.0  |
| 40(1) | 10(1) | 1668.5 | 1634.2 | 39.0 |
| 40(1) | 11(1) | 1539.2 | 1508.4 | 9.6  |
| 40(1) | 12(1) | 1520.1 | 1487.7 | 0.4  |

|       |       |        |        |     |
|-------|-------|--------|--------|-----|
| 40(1) | 13(1) | 1480.4 | 1440.9 | 1.5 |
| 40(1) | 14(1) | 1461.0 | 1436.8 | 0.0 |
| 40(1) | 15(1) | 1406.5 | 1379.5 | 0.0 |
| 40(1) | 16(1) | 1380.8 | 1348.3 | 0.4 |
| 40(1) | 17(1) | 1356.6 | 1333.9 | 1.6 |
| 40(1) | 18(1) | 1328.8 | 1304.8 | 0.6 |
| 40(1) | 19(1) | 1249.5 | 1226.2 | 0.8 |
| 40(1) | 20(1) | 1169.9 | 1151.9 | 3.1 |
| 40(1) | 21(1) | 1144.2 | 1130.3 | 0.4 |
| 40(1) | 22(1) | 1063.6 | 1058.3 | 0.0 |
| 40(1) | 23(1) | 1006.9 | 996.7  | 0.0 |
| 40(1) | 24(1) | 959.8  | 951.0  | 0.0 |
| 40(1) | 25(1) | 942.3  | 928.4  | 0.0 |
| 40(1) | 26(1) | 930.5  | 916.4  | 0.0 |
| 40(1) | 27(1) | 888.4  | 880.9  | 0.0 |
| 40(1) | 28(1) | 828.5  | 818.0  | 0.0 |
| 40(1) | 29(1) | 779.0  | 771.1  | 1.3 |
| 40(1) | 30(1) | 762.4  | 752.6  | 0.2 |
| 40(1) | 31(1) | 703.8  | 697.1  | 0.0 |
| 40(1) | 32(1) | 676.8  | 632.8  | 0.5 |
| 40(1) | 33(1) | 652.2  | 644.0  | 0.0 |
| 40(1) | 34(1) | 609.4  | 603.5  | 0.0 |
| 40(1) | 35(1) | 563.6  | 553.0  | 0.0 |
| 40(1) | 36(1) | 541.0  | 535.6  | 0.0 |
| 40(1) | 37(1) | 487.0  | 481.9  | 0.8 |
| 40(1) | 38(1) | 445.7  | 440.9  | 0.0 |
| 40(1) | 39(1) | 406.0  | 402.2  | 0.0 |
| 41(1) | 1(1)  | 3907.1 | 3729.5 | 0.0 |
| 41(1) | 2(1)  | 3893.9 | 3704.6 | 0.0 |
| 41(1) | 3(1)  | 3309.7 | 3182.6 | 0.0 |
| 41(1) | 4(1)  | 3275.2 | 3150.7 | 0.0 |
| 41(1) | 5(1)  | 3259.6 | 3138.7 | 0.0 |
| 41(1) | 6(1)  | 1932.6 | 1896.4 | 0.2 |
| 41(1) | 7(1)  | 1757.0 | 1711.6 | 0.1 |
| 41(1) | 8(1)  | 1718.8 | 1679.8 | 0.0 |
| 41(1) | 9(1)  | 1633.2 | 1595.5 | 0.2 |
| 41(1) | 10(1) | 1585.3 | 1549.6 | 0.0 |
| 41(1) | 11(1) | 1456.0 | 1425.0 | 0.1 |
| 41(1) | 12(1) | 1437.0 | 1404.2 | 0.2 |
| 41(1) | 13(1) | 1397.2 | 1357.9 | 0.3 |

|       |       |        |        |      |
|-------|-------|--------|--------|------|
| 41(1) | 14(1) | 1377.8 | 1353.2 | 0.0  |
| 41(1) | 15(1) | 1323.3 | 1295.8 | 0.0  |
| 41(1) | 16(1) | 1297.6 | 1264.0 | 24.3 |
| 41(1) | 17(1) | 1273.4 | 1249.8 | 0.1  |
| 41(1) | 18(1) | 1245.6 | 1221.1 | 0.1  |
| 41(1) | 19(1) | 1166.4 | 1142.6 | 0.1  |
| 41(1) | 20(1) | 1086.7 | 1068.3 | 0.0  |
| 41(1) | 21(1) | 1061.1 | 1045.6 | 0.0  |
| 41(1) | 22(1) | 980.4  | 974.4  | 0.0  |
| 41(1) | 23(1) | 923.7  | 912.9  | 0.2  |
| 41(1) | 24(1) | 876.6  | 867.1  | 0.1  |
| 41(1) | 25(1) | 859.1  | 844.9  | 0.0  |
| 41(1) | 26(1) | 847.3  | 833.0  | 0.0  |
| 41(1) | 27(1) | 805.3  | 796.5  | 0.0  |
| 41(1) | 28(1) | 745.3  | 734.4  | 0.1  |
| 41(1) | 29(1) | 695.8  | 687.1  | 0.0  |
| 41(1) | 30(1) | 679.2  | 669.5  | 0.0  |
| 41(1) | 31(1) | 620.7  | 612.9  | 0.0  |
| 41(1) | 32(1) | 593.6  | 548.7  | 0.1  |
| 41(1) | 33(1) | 569.1  | 559.7  | 0.1  |
| 41(1) | 34(1) | 526.2  | 519.1  | 0.0  |
| 41(1) | 35(1) | 480.4  | 467.8  | 0.2  |
| 41(1) | 36(1) | 457.8  | 452.0  | 0.0  |
| 41(1) | 37(1) | 403.8  | 398.4  | 0.0  |
| 41(1) | 38(1) | 362.5  | 355.5  | 0.0  |
| 41(1) | 39(1) | 322.8  | 318.9  | 0.0  |
| 41(1) | 40(1) | 273.6  | 270.5  | 0.0  |
| 42(1) | 1(1)  | 3874.2 | 3697.8 | 0.0  |
| 42(1) | 2(1)  | 3861.0 | 3672.0 | 0.1  |
| 42(1) | 3(1)  | 3276.8 | 3150.1 | 0.0  |
| 42(1) | 4(1)  | 3242.3 | 3118.4 | 0.0  |
| 42(1) | 5(1)  | 3226.7 | 3106.4 | 0.0  |
| 42(1) | 6(1)  | 1899.7 | 1864.3 | 1.3  |
| 42(1) | 7(1)  | 1724.1 | 1679.7 | 0.0  |
| 42(1) | 8(1)  | 1685.9 | 1647.6 | 0.1  |
| 42(1) | 9(1)  | 1600.2 | 1563.6 | 0.2  |
| 42(1) | 10(1) | 1552.4 | 1517.0 | 0.1  |
| 42(1) | 11(1) | 1423.1 | 1392.5 | 0.1  |
| 42(1) | 12(1) | 1404.1 | 1372.3 | 0.2  |
| 42(1) | 13(1) | 1364.3 | 1325.5 | 1.1  |

|       |       |        |        |     |
|-------|-------|--------|--------|-----|
| 42(1) | 14(1) | 1344.9 | 1321.6 | 0.5 |
| 42(1) | 15(1) | 1290.4 | 1263.6 | 1.5 |
| 42(1) | 16(1) | 1264.7 | 1231.8 | 0.1 |
| 42(1) | 17(1) | 1240.5 | 1217.7 | 0.2 |
| 42(1) | 18(1) | 1212.7 | 1189.1 | 0.1 |
| 42(1) | 19(1) | 1133.5 | 1110.3 | 0.5 |
| 42(1) | 20(1) | 1053.8 | 1035.9 | 0.0 |
| 42(1) | 21(1) | 1028.2 | 1013.2 | 0.0 |
| 42(1) | 22(1) | 947.5  | 942.5  | 0.0 |
| 42(1) | 23(1) | 890.8  | 880.5  | 0.0 |
| 42(1) | 24(1) | 843.7  | 835.3  | 0.0 |
| 42(1) | 25(1) | 826.2  | 812.6  | 0.0 |
| 42(1) | 26(1) | 814.4  | 800.4  | 0.0 |
| 42(1) | 27(1) | 772.4  | 765.0  | 0.7 |
| 42(1) | 28(1) | 712.4  | 700.6  | 0.0 |
| 42(1) | 29(1) | 662.9  | 655.5  | 0.0 |
| 42(1) | 30(1) | 646.3  | 636.7  | 0.1 |
| 42(1) | 31(1) | 587.8  | 580.5  | 0.0 |
| 42(1) | 32(1) | 560.7  | 510.5  | 1.5 |
| 42(1) | 33(1) | 536.1  | 527.5  | 0.1 |
| 42(1) | 34(1) | 493.3  | 487.6  | 0.3 |
| 42(1) | 35(1) | 447.5  | 441.3  | 0.0 |
| 42(1) | 36(1) | 424.9  | 418.7  | 0.8 |
| 42(1) | 37(1) | 370.9  | 364.7  | 0.0 |
| 42(1) | 38(1) | 329.6  | 325.7  | 0.0 |
| 42(1) | 39(1) | 289.9  | 287.5  | 0.0 |
| 42(1) | 40(1) | 240.7  | 237.6  | 0.0 |
| 42(1) | 41(1) | 157.5  | 154.5  | 0.0 |

**Table S20.** Harmonic and anharmonic vibrational frequencies and their intensities of conformer **D2**<sup>\*</sup> as computed at the B3LYP/cc-pVTZ level of theory.

| Mode (quanta) | $\nu_{\text{harm}}$<br>(cm <sup>-1</sup> ) | $\nu_{\text{anharm}}$<br>(cm <sup>-1</sup> ) | $I_{\text{harm}}$<br>(km mol <sup>-1</sup> ) | $I_{\text{anharm}}$<br>(km mol <sup>-1</sup> ) |
|---------------|--------------------------------------------|----------------------------------------------|----------------------------------------------|------------------------------------------------|
| 1(1)          | 3811.9                                     | 3637.1                                       | 87.4                                         | 72.9                                           |
| 2(1)          | 3798.7                                     | 3610.6                                       | 31.0                                         | 25.6                                           |
| 3(1)          | 3214.5                                     | 3085.1                                       | 0.3                                          | 0.1                                            |
| 4(1)          | 3180.0                                     | 3043.4                                       | 4.4                                          | 6.0                                            |
| 5(1)          | 3164.4                                     | 3037.6                                       | 8.1                                          | 6.4                                            |
| 6(1)          | 1837.4                                     | 1806.0                                       | 357.5                                        | 279.4                                          |
| 7(1)          | 1661.8                                     | 1616.1                                       | 220.6                                        | 72.4                                           |
| 8(1)          | 1623.6                                     | 1587.0                                       | 96.7                                         | 63.7                                           |
| 9(1)          | 1537.9                                     | 1499.6                                       | 44.1                                         | 30.8                                           |
| 10(1)         | 1490.1                                     | 1455.2                                       | 54.5                                         | 15.4                                           |
| 11(1)         | 1360.8                                     | 1328.1                                       | 21.7                                         | 0.9                                            |
| 12(1)         | 1341.8                                     | 1312.0                                       | 40.9                                         | 18.5                                           |
| 13(1)         | 1302.0                                     | 1267.9                                       | 587.6                                        | 214.2                                          |
| 14(1)         | 1282.6                                     | 1260.7                                       | 15.4                                         | 23.2                                           |
| 15(1)         | 1228.1                                     | 1194.6                                       | 26.1                                         | 30.9                                           |
| 16(1)         | 1202.4                                     | 1176.2                                       | 27.4                                         | 19.0                                           |
| 17(1)         | 1178.2                                     | 1157.0                                       | 42.5                                         | 15.2                                           |
| 18(1)         | 1150.4                                     | 1128.0                                       | 201.0                                        | 104.6                                          |
| 19(1)         | 1071.1                                     | 1049.5                                       | 49.6                                         | 49.4                                           |
| 20(1)         | 991.5                                      | 975.2                                        | 36.2                                         | 38.3                                           |
| 21(1)         | 965.9                                      | 953.8                                        | 2.7                                          | 1.6                                            |
| 22(1)         | 885.2                                      | 879.5                                        | 29.9                                         | 34.2                                           |
| 23(1)         | 828.5                                      | 819.8                                        | 12.1                                         | 10.5                                           |
| 24(1)         | 781.4                                      | 774.2                                        | 20.9                                         | 13.9                                           |
| 25(1)         | 763.9                                      | 751.9                                        | 8.7                                          | 9.4                                            |
| 26(1)         | 752.1                                      | 740.2                                        | 10.4                                         | 4.7                                            |
| 27(1)         | 710.1                                      | 705.0                                        | 8.5                                          | 11.1                                           |
| 28(1)         | 650.1                                      | 640.8                                        | 8.7                                          | 8.4                                            |
| 29(1)         | 600.6                                      | 594.4                                        | 16.4                                         | 16.7                                           |
| 30(1)         | 584.0                                      | 576.0                                        | 1.9                                          | 3.4                                            |
| 31(1)         | 525.5                                      | 520.2                                        | 4.3                                          | 5.0                                            |
| 32(1)         | 498.4                                      | 445.3                                        | 92.2                                         | 82.0                                           |
| 33(1)         | 473.8                                      | 467.1                                        | 0.9                                          | 1.8                                            |
| 34(1)         | 431.0                                      | 425.5                                        | 13.4                                         | 20.1                                           |
| 35(1)         | 385.2                                      | 382.2                                        | 97.8                                         | 91.3                                           |
| 36(1)         | 362.6                                      | 360.9                                        | 3.0                                          | 2.7                                            |
| 37(1)         | 308.6                                      | 305.2                                        | 1.7                                          | 1.7                                            |

|       |        |        |     |      |
|-------|--------|--------|-----|------|
| 38(1) | 267.3  | 264.5  | 5.0 | 5.2  |
| 39(1) | 227.6  | 226.0  | 1.2 | 0.7  |
| 40(1) | 178.4  | 175.9  | 3.0 | 3.2  |
| 41(1) | 95.2   | 92.1   | 1.8 | 1.9  |
| 42(1) | 62.3   | 61.5   | 3.4 | 4.1  |
| 1(2)  | 7623.8 | 7109.4 |     | 6.1  |
| 2(2)  | 7597.3 | 7053.1 |     | 3.1  |
| 3(2)  | 6429.0 | 6070.4 |     | 0.7  |
| 4(2)  | 6360.0 | 6054.5 |     | 0.3  |
| 5(2)  | 6328.7 | 6030.6 |     | 0.8  |
| 6(2)  | 3674.7 | 3591.4 |     | 5.1  |
| 7(2)  | 3323.6 | 3235.7 |     | 0.5  |
| 8(2)  | 3247.3 | 3168.7 |     | 0.7  |
| 9(2)  | 3075.9 | 2997.9 |     | 0.1  |
| 10(2) | 2980.2 | 2908.9 |     | 0.1  |
| 11(2) | 2721.6 | 2660.8 |     | 1.8  |
| 12(2) | 2683.5 | 2620.0 |     | 0.8  |
| 13(2) | 2604.0 | 2521.2 |     | 0.1  |
| 14(2) | 2565.3 | 2517.6 |     | 0.2  |
| 15(2) | 2456.2 | 2400.8 |     | 1.8  |
| 16(2) | 2404.8 | 2339.6 |     | 0.8  |
| 17(2) | 2356.4 | 2312.7 |     | 0.2  |
| 18(2) | 2300.9 | 2255.6 |     | 0.2  |
| 19(2) | 2142.3 | 2094.5 |     | 1.5  |
| 20(2) | 1983.1 | 1949.2 |     | 0.3  |
| 21(2) | 1931.7 | 1907.3 |     | 3.7  |
| 22(2) | 1770.4 | 1761.3 |     | 1.1  |
| 23(2) | 1657.0 | 1640.8 |     | 2.3  |
| 24(2) | 1562.8 | 1548.8 |     | 0.9  |
| 25(2) | 1527.8 | 1502.7 |     | 1.1  |
| 26(2) | 1504.2 | 1480.1 |     | 0.5  |
| 27(2) | 1420.1 | 1405.7 |     | 0.1  |
| 28(2) | 1300.2 | 1281.5 |     | 89.3 |
| 29(2) | 1201.2 | 1188.1 |     | 14.1 |
| 30(2) | 1168.1 | 1151.2 |     | 0.4  |
| 31(2) | 1050.9 | 1040.2 |     | 0.1  |
| 32(2) | 996.9  | 854.1  |     | 1.2  |
| 33(2) | 947.7  | 934.5  |     | 0.1  |
| 34(2) | 862.0  | 850.2  |     | 0.1  |
| 35(2) | 770.4  | 752.8  |     | 15.2 |



|       |      |        |        |     |
|-------|------|--------|--------|-----|
| 36(2) |      | 725.2  | 717.9  | 0.1 |
| 37(2) |      | 617.2  | 610.3  | 0.1 |
| 38(2) |      | 534.6  | 528.6  | 0.3 |
| 39(2) |      | 455.3  | 451.7  | 0.3 |
| 40(2) |      | 356.8  | 352.0  | 0.1 |
| 41(2) |      | 190.4  | 184.2  | 0.0 |
| 42(2) |      | 124.6  | 121.5  | 0.0 |
| 2(1)  | 1(1) | 7610.6 | 7247.4 | 0.0 |
| 3(1)  | 1(1) | 7026.4 | 6726.5 | 0.0 |
| 3(1)  | 2(1) | 7013.1 | 6700.0 | 0.0 |
| 4(1)  | 1(1) | 6991.9 | 6694.1 | 0.0 |
| 4(1)  | 2(1) | 6978.7 | 6667.7 | 0.0 |
| 4(1)  | 3(1) | 6394.5 | 6146.8 | 0.0 |
| 5(1)  | 1(1) | 6976.3 | 6681.7 | 0.0 |
| 5(1)  | 2(1) | 6963.0 | 6655.9 | 0.0 |
| 5(1)  | 3(1) | 6378.8 | 6134.9 | 0.0 |
| 5(1)  | 4(1) | 6344.4 | 5999.3 | 0.2 |
| 6(1)  | 1(1) | 5649.3 | 5442.4 | 0.0 |
| 6(1)  | 2(1) | 5636.0 | 5412.7 | 0.1 |
| 6(1)  | 3(1) | 5051.8 | 4894.8 | 0.0 |
| 6(1)  | 4(1) | 5017.4 | 4862.9 | 0.0 |
| 6(1)  | 5(1) | 5001.7 | 4850.8 | 0.0 |
| 7(1)  | 1(1) | 5473.7 | 5254.9 | 0.0 |
| 7(1)  | 2(1) | 5460.5 | 5229.5 | 0.0 |
| 7(1)  | 3(1) | 4876.3 | 4710.7 | 0.0 |
| 7(1)  | 4(1) | 4841.8 | 4676.7 | 0.1 |
| 7(1)  | 5(1) | 4826.2 | 4667.6 | 0.2 |
| 7(1)  | 6(1) | 3499.2 | 3424.1 | 0.1 |
| 8(1)  | 1(1) | 5435.6 | 5222.7 | 0.6 |
| 8(1)  | 2(1) | 5422.3 | 5197.5 | 0.0 |
| 8(1)  | 3(1) | 4838.1 | 4674.6 | 0.2 |
| 8(1)  | 4(1) | 4803.7 | 4643.5 | 0.1 |
| 8(1)  | 5(1) | 4788.0 | 4633.9 | 0.2 |
| 8(1)  | 6(1) | 3461.0 | 3391.7 | 0.0 |
| 8(1)  | 7(1) | 3285.5 | 3204.4 | 0.5 |
| 9(1)  | 1(1) | 5349.9 | 5139.2 | 0.0 |
| 9(1)  | 2(1) | 5336.6 | 5113.5 | 0.0 |
| 9(1)  | 3(1) | 4752.4 | 4592.6 | 0.0 |
| 9(1)  | 4(1) | 4718.0 | 4566.6 | 0.0 |
| 9(1)  | 5(1) | 4702.3 | 4549.4 | 0.1 |

|       |       |        |        |     |
|-------|-------|--------|--------|-----|
| 9(1)  | 6(1)  | 3375.3 | 3308.0 | 0.0 |
| 9(1)  | 7(1)  | 3199.8 | 3130.7 | 0.0 |
| 9(1)  | 8(1)  | 3161.6 | 3091.0 | 0.0 |
| 10(1) | 1(1)  | 5302.0 | 5091.3 | 0.6 |
| 10(1) | 2(1)  | 5288.7 | 5067.1 | 0.0 |
| 10(1) | 3(1)  | 4704.6 | 4550.2 | 0.1 |
| 10(1) | 4(1)  | 4670.1 | 4513.9 | 0.0 |
| 10(1) | 5(1)  | 4654.4 | 4508.9 | 0.0 |
| 10(1) | 6(1)  | 3327.4 | 3261.7 | 0.0 |
| 10(1) | 7(1)  | 3151.9 | 3068.4 | 1.9 |
| 10(1) | 8(1)  | 3113.7 | 3037.2 | 0.4 |
| 10(1) | 9(1)  | 3028.0 | 2955.4 | 0.0 |
| 11(1) | 1(1)  | 5172.7 | 4966.7 | 0.3 |
| 11(1) | 2(1)  | 5159.5 | 4941.7 | 0.0 |
| 11(1) | 3(1)  | 4575.3 | 4422.1 | 0.0 |
| 11(1) | 4(1)  | 4540.8 | 4392.4 | 0.0 |
| 11(1) | 5(1)  | 4525.2 | 4379.5 | 0.0 |
| 11(1) | 6(1)  | 3198.2 | 3136.5 | 0.0 |
| 11(1) | 7(1)  | 3022.6 | 2940.4 | 0.0 |
| 11(1) | 8(1)  | 2984.4 | 2909.5 | 0.3 |
| 11(1) | 9(1)  | 2898.8 | 2828.1 | 0.6 |
| 11(1) | 10(1) | 2850.9 | 2783.3 | 1.3 |
| 12(1) | 1(1)  | 5153.7 | 4949.6 | 0.4 |
| 12(1) | 2(1)  | 5140.4 | 4922.3 | 0.0 |
| 12(1) | 3(1)  | 4556.2 | 4401.2 | 0.3 |
| 12(1) | 4(1)  | 4521.8 | 4368.2 | 0.1 |
| 12(1) | 5(1)  | 4506.1 | 4357.9 | 0.1 |
| 12(1) | 6(1)  | 3179.1 | 3117.1 | 0.8 |
| 12(1) | 7(1)  | 3003.6 | 2926.4 | 0.0 |
| 12(1) | 8(1)  | 2965.4 | 2896.8 | 0.0 |
| 12(1) | 9(1)  | 2879.7 | 2811.0 | 0.7 |
| 12(1) | 10(1) | 2831.8 | 2764.3 | 0.0 |
| 12(1) | 11(1) | 2702.6 | 2639.9 | 0.1 |
| 13(1) | 1(1)  | 5113.9 | 4902.6 | 0.1 |
| 13(1) | 2(1)  | 5100.7 | 4873.2 | 1.0 |
| 13(1) | 3(1)  | 4516.5 | 4353.8 | 0.0 |
| 13(1) | 4(1)  | 4482.0 | 4323.3 | 0.0 |
| 13(1) | 5(1)  | 4466.4 | 4311.2 | 0.0 |
| 13(1) | 6(1)  | 3139.4 | 3068.3 | 0.2 |
| 13(1) | 7(1)  | 2963.8 | 2882.3 | 0.2 |

|       |       |        |        |     |
|-------|-------|--------|--------|-----|
| 13(1) | 8(1)  | 2925.7 | 2851.7 | 0.0 |
| 13(1) | 9(1)  | 2840.0 | 2767.2 | 0.0 |
| 13(1) | 10(1) | 2792.1 | 2721.3 | 0.1 |
| 13(1) | 11(1) | 2662.8 | 2595.4 | 0.1 |
| 13(1) | 12(1) | 2643.8 | 2575.8 | 0.3 |
| 14(1) | 1(1)  | 5094.6 | 4897.2 | 0.0 |
| 14(1) | 2(1)  | 5081.3 | 4870.8 | 0.0 |
| 14(1) | 3(1)  | 4497.1 | 4347.7 | 0.1 |
| 14(1) | 4(1)  | 4462.7 | 4313.9 | 0.0 |
| 14(1) | 5(1)  | 4447.0 | 4303.7 | 0.0 |
| 14(1) | 6(1)  | 3120.0 | 3065.4 | 0.0 |
| 14(1) | 7(1)  | 2944.5 | 2874.8 | 0.1 |
| 14(1) | 8(1)  | 2906.3 | 2845.7 | 0.1 |
| 14(1) | 9(1)  | 2820.6 | 2759.4 | 0.1 |
| 14(1) | 10(1) | 2772.7 | 2714.9 | 0.0 |
| 14(1) | 11(1) | 2643.4 | 2589.5 | 0.3 |
| 14(1) | 12(1) | 2624.4 | 2571.0 | 0.1 |
| 14(1) | 13(1) | 2584.7 | 2525.4 | 0.1 |
| 15(1) | 1(1)  | 5040.0 | 4831.6 | 0.7 |
| 15(1) | 2(1)  | 5026.7 | 4812.9 | 0.0 |
| 15(1) | 3(1)  | 4442.6 | 4292.2 | 0.0 |
| 15(1) | 4(1)  | 4408.1 | 4259.3 | 0.0 |
| 15(1) | 5(1)  | 4392.4 | 4247.8 | 0.0 |
| 15(1) | 6(1)  | 3065.4 | 3008.1 | 0.0 |
| 15(1) | 7(1)  | 2889.9 | 2819.0 | 0.1 |
| 15(1) | 8(1)  | 2851.7 | 2786.1 | 0.1 |
| 15(1) | 9(1)  | 2766.0 | 2703.8 | 0.0 |
| 15(1) | 10(1) | 2718.2 | 2655.0 | 0.0 |
| 15(1) | 11(1) | 2588.9 | 2530.7 | 0.6 |
| 15(1) | 12(1) | 2569.8 | 2510.7 | 1.2 |
| 15(1) | 13(1) | 2530.1 | 2467.4 | 0.0 |
| 15(1) | 14(1) | 2510.7 | 2461.7 | 0.2 |
| 16(1) | 1(1)  | 5014.3 | 4809.8 | 0.0 |
| 16(1) | 2(1)  | 5001.1 | 4772.5 | 0.9 |
| 16(1) | 3(1)  | 4416.9 | 4260.8 | 0.0 |
| 16(1) | 4(1)  | 4382.4 | 4229.9 | 0.0 |
| 16(1) | 5(1)  | 4366.8 | 4217.5 | 0.0 |
| 16(1) | 6(1)  | 3039.8 | 2974.3 | 0.0 |
| 16(1) | 7(1)  | 2864.2 | 2789.6 | 0.0 |
| 16(1) | 8(1)  | 2826.1 | 2758.8 | 0.0 |

|       |       |        |        |     |
|-------|-------|--------|--------|-----|
| 16(1) | 9(1)  | 2740.4 | 2674.2 | 0.2 |
| 16(1) | 10(1) | 2692.5 | 2628.3 | 0.0 |
| 16(1) | 11(1) | 2563.2 | 2501.9 | 0.2 |
| 16(1) | 12(1) | 2544.2 | 2483.6 | 0.0 |
| 16(1) | 13(1) | 2504.4 | 2425.7 | 1.3 |
| 16(1) | 14(1) | 2485.1 | 2432.8 | 0.1 |
| 16(1) | 15(1) | 2430.5 | 2374.9 | 0.2 |
| 17(1) | 1(1)  | 4990.1 | 4792.8 | 0.2 |
| 17(1) | 2(1)  | 4976.9 | 4766.9 | 0.0 |
| 17(1) | 3(1)  | 4392.7 | 4241.3 | 0.0 |
| 17(1) | 4(1)  | 4358.2 | 4211.7 | 0.0 |
| 17(1) | 5(1)  | 4342.6 | 4198.6 | 0.0 |
| 17(1) | 6(1)  | 3015.6 | 2962.2 | 0.0 |
| 17(1) | 7(1)  | 2840.0 | 2773.0 | 0.1 |
| 17(1) | 8(1)  | 2801.8 | 2741.5 | 0.1 |
| 17(1) | 9(1)  | 2716.2 | 2657.5 | 0.4 |
| 17(1) | 10(1) | 2668.3 | 2610.6 | 0.1 |
| 17(1) | 11(1) | 2539.0 | 2486.2 | 0.2 |
| 17(1) | 12(1) | 2520.0 | 2465.3 | 0.7 |
| 17(1) | 13(1) | 2480.2 | 2421.7 | 0.3 |
| 17(1) | 14(1) | 2460.8 | 2417.3 | 0.3 |
| 17(1) | 15(1) | 2406.3 | 2355.9 | 0.9 |
| 17(1) | 16(1) | 2380.6 | 2329.0 | 0.0 |
| 18(1) | 1(1)  | 4962.3 | 4764.8 | 0.4 |
| 18(1) | 2(1)  | 4949.1 | 4737.4 | 0.1 |
| 18(1) | 3(1)  | 4364.9 | 4213.3 | 0.1 |
| 18(1) | 4(1)  | 4330.5 | 4184.6 | 0.0 |
| 18(1) | 5(1)  | 4314.8 | 4171.8 | 0.0 |
| 18(1) | 6(1)  | 2987.8 | 2932.9 | 0.0 |
| 18(1) | 7(1)  | 2812.3 | 2742.9 | 0.6 |
| 18(1) | 8(1)  | 2774.1 | 2713.0 | 0.1 |
| 18(1) | 9(1)  | 2688.4 | 2629.1 | 0.2 |
| 18(1) | 10(1) | 2640.5 | 2582.0 | 1.2 |
| 18(1) | 11(1) | 2511.2 | 2457.4 | 0.0 |
| 18(1) | 12(1) | 2492.2 | 2436.9 | 0.8 |
| 18(1) | 13(1) | 2452.5 | 2392.1 | 0.5 |
| 18(1) | 14(1) | 2433.1 | 2388.1 | 0.9 |
| 18(1) | 15(1) | 2378.5 | 2327.8 | 0.2 |
| 18(1) | 16(1) | 2352.9 | 2299.9 | 0.4 |
| 18(1) | 17(1) | 2328.6 | 2283.6 | 0.0 |

|       |       |        |        |     |
|-------|-------|--------|--------|-----|
| 19(1) | 1(1)  | 4883.1 | 4686.4 | 0.0 |
| 19(1) | 2(1)  | 4869.8 | 4658.1 | 0.2 |
| 19(1) | 3(1)  | 4285.6 | 4138.3 | 0.1 |
| 19(1) | 4(1)  | 4251.2 | 4106.8 | 0.1 |
| 19(1) | 5(1)  | 4235.5 | 4094.8 | 0.2 |
| 19(1) | 6(1)  | 2908.5 | 2852.9 | 0.2 |
| 19(1) | 7(1)  | 2733.0 | 2666.7 | 0.0 |
| 19(1) | 8(1)  | 2694.8 | 2634.7 | 0.0 |
| 19(1) | 9(1)  | 2609.1 | 2551.7 | 0.0 |
| 19(1) | 10(1) | 2561.2 | 2505.6 | 0.2 |
| 19(1) | 11(1) | 2432.0 | 2378.5 | 0.1 |
| 19(1) | 12(1) | 2412.9 | 2361.0 | 0.2 |
| 19(1) | 13(1) | 2373.2 | 2309.5 | 2.4 |
| 19(1) | 14(1) | 2353.8 | 2309.6 | 0.0 |
| 19(1) | 15(1) | 2299.2 | 2251.8 | 0.1 |
| 19(1) | 16(1) | 2273.6 | 2219.3 | 0.1 |
| 19(1) | 17(1) | 2249.4 | 2206.2 | 0.0 |
| 19(1) | 18(1) | 2221.6 | 2176.1 | 0.6 |
| 20(1) | 1(1)  | 4803.4 | 4612.3 | 0.0 |
| 20(1) | 2(1)  | 4790.2 | 4585.5 | 0.0 |
| 20(1) | 3(1)  | 4206.0 | 4061.9 | 0.1 |
| 20(1) | 4(1)  | 4171.6 | 4031.5 | 0.1 |
| 20(1) | 5(1)  | 4155.9 | 4019.3 | 0.3 |
| 20(1) | 6(1)  | 2828.9 | 2780.5 | 0.0 |
| 20(1) | 7(1)  | 2653.4 | 2591.9 | 0.0 |
| 20(1) | 8(1)  | 2615.2 | 2558.2 | 0.0 |
| 20(1) | 9(1)  | 2529.5 | 2476.3 | 0.4 |
| 20(1) | 10(1) | 2481.6 | 2429.7 | 0.2 |
| 20(1) | 11(1) | 2352.3 | 2305.1 | 0.3 |
| 20(1) | 12(1) | 2333.3 | 2285.4 | 0.7 |
| 20(1) | 13(1) | 2293.6 | 2240.9 | 0.2 |
| 20(1) | 14(1) | 2274.2 | 2235.1 | 0.2 |
| 20(1) | 15(1) | 2219.6 | 2176.2 | 0.1 |
| 20(1) | 16(1) | 2194.0 | 2147.5 | 0.0 |
| 20(1) | 17(1) | 2169.7 | 2131.6 | 0.1 |
| 20(1) | 18(1) | 2142.0 | 2102.7 | 0.6 |
| 20(1) | 19(1) | 2062.7 | 2024.3 | 0.3 |
| 21(1) | 1(1)  | 4777.8 | 4590.6 | 0.0 |
| 21(1) | 2(1)  | 4764.5 | 4564.7 | 0.0 |
| 21(1) | 3(1)  | 4180.3 | 4042.8 | 0.0 |

|       |       |        |        |     |
|-------|-------|--------|--------|-----|
| 21(1) | 4(1)  | 4145.9 | 4001.2 | 0.0 |
| 21(1) | 5(1)  | 4130.2 | 3992.1 | 0.0 |
| 21(1) | 6(1)  | 2803.2 | 2758.8 | 0.0 |
| 21(1) | 7(1)  | 2627.7 | 2571.0 | 0.0 |
| 21(1) | 8(1)  | 2589.5 | 2540.2 | 0.0 |
| 21(1) | 9(1)  | 2503.8 | 2456.2 | 0.0 |
| 21(1) | 10(1) | 2455.9 | 2410.1 | 0.0 |
| 21(1) | 11(1) | 2326.7 | 2284.6 | 0.0 |
| 21(1) | 12(1) | 2307.6 | 2265.6 | 0.0 |
| 21(1) | 13(1) | 2267.9 | 2219.4 | 0.0 |
| 21(1) | 14(1) | 2248.5 | 2215.0 | 0.0 |
| 21(1) | 15(1) | 2193.9 | 2156.5 | 0.0 |
| 21(1) | 16(1) | 2168.3 | 2125.9 | 0.0 |
| 21(1) | 17(1) | 2144.1 | 2110.0 | 0.0 |
| 21(1) | 18(1) | 2116.3 | 2081.9 | 0.0 |
| 21(1) | 19(1) | 2037.0 | 2003.6 | 0.1 |
| 21(1) | 20(1) | 1957.4 | 1929.1 | 0.1 |
| 22(1) | 1(1)  | 4697.1 | 4516.3 | 0.0 |
| 22(1) | 2(1)  | 4683.9 | 4490.1 | 0.0 |
| 22(1) | 3(1)  | 4099.7 | 3954.8 | 0.0 |
| 22(1) | 4(1)  | 4065.2 | 3936.6 | 0.0 |
| 22(1) | 5(1)  | 4049.6 | 3924.7 | 0.0 |
| 22(1) | 6(1)  | 2722.6 | 2684.9 | 0.0 |
| 22(1) | 7(1)  | 2547.0 | 2496.0 | 0.0 |
| 22(1) | 8(1)  | 2508.9 | 2464.9 | 0.0 |
| 22(1) | 9(1)  | 2423.2 | 2381.9 | 0.0 |
| 22(1) | 10(1) | 2375.3 | 2334.4 | 0.0 |
| 22(1) | 11(1) | 2246.0 | 2210.2 | 0.0 |
| 22(1) | 12(1) | 2227.0 | 2190.9 | 0.0 |
| 22(1) | 13(1) | 2187.2 | 2144.7 | 0.0 |
| 22(1) | 14(1) | 2167.9 | 2140.7 | 0.0 |
| 22(1) | 15(1) | 2113.3 | 2080.8 | 0.0 |
| 22(1) | 16(1) | 2087.6 | 2051.9 | 0.0 |
| 22(1) | 17(1) | 2063.4 | 2037.0 | 0.0 |
| 22(1) | 18(1) | 2035.7 | 2008.0 | 0.0 |
| 22(1) | 19(1) | 1956.4 | 1928.5 | 0.0 |
| 22(1) | 20(1) | 1876.8 | 1854.4 | 0.0 |
| 22(1) | 21(1) | 1851.1 | 1835.6 | 0.8 |
| 23(1) | 1(1)  | 4640.4 | 4456.1 | 0.0 |
| 23(1) | 2(1)  | 4627.1 | 4430.2 | 0.0 |

|       |       |        |        |     |
|-------|-------|--------|--------|-----|
| 23(1) | 3(1)  | 4043.0 | 3909.0 | 0.0 |
| 23(1) | 4(1)  | 4008.5 | 3873.2 | 0.0 |
| 23(1) | 5(1)  | 3992.8 | 3859.8 | 0.0 |
| 23(1) | 6(1)  | 2665.8 | 2624.3 | 0.0 |
| 23(1) | 7(1)  | 2490.3 | 2437.7 | 0.0 |
| 23(1) | 8(1)  | 2452.1 | 2405.5 | 0.0 |
| 23(1) | 9(1)  | 2366.4 | 2321.8 | 0.0 |
| 23(1) | 10(1) | 2318.6 | 2276.8 | 0.0 |
| 23(1) | 11(1) | 2189.3 | 2150.8 | 0.0 |
| 23(1) | 12(1) | 2170.2 | 2132.3 | 0.0 |
| 23(1) | 13(1) | 2130.5 | 2081.5 | 0.0 |
| 23(1) | 14(1) | 2111.1 | 2079.2 | 0.0 |
| 23(1) | 15(1) | 2056.6 | 2022.0 | 0.0 |
| 23(1) | 16(1) | 2030.9 | 1990.6 | 0.0 |
| 23(1) | 17(1) | 2006.7 | 1976.4 | 0.0 |
| 23(1) | 18(1) | 1978.9 | 1947.7 | 0.0 |
| 23(1) | 19(1) | 1899.6 | 1868.8 | 0.2 |
| 23(1) | 20(1) | 1820.0 | 1794.4 | 0.0 |
| 23(1) | 21(1) | 1794.3 | 1773.6 | 0.5 |
| 23(1) | 22(1) | 1713.7 | 1700.6 | 0.4 |
| 24(1) | 1(1)  | 4593.3 | 4411.1 | 0.0 |
| 24(1) | 2(1)  | 4580.1 | 4384.8 | 0.0 |
| 24(1) | 3(1)  | 3995.9 | 3862.8 | 0.0 |
| 24(1) | 4(1)  | 3961.4 | 3829.7 | 0.0 |
| 24(1) | 5(1)  | 3945.8 | 3817.6 | 0.0 |
| 24(1) | 6(1)  | 2618.8 | 2577.7 | 0.1 |
| 24(1) | 7(1)  | 2443.2 | 2392.5 | 0.1 |
| 24(1) | 8(1)  | 2405.0 | 2360.2 | 0.0 |
| 24(1) | 9(1)  | 2319.4 | 2276.9 | 0.0 |
| 24(1) | 10(1) | 2271.5 | 2229.9 | 0.0 |
| 24(1) | 11(1) | 2142.2 | 2104.3 | 0.0 |
| 24(1) | 12(1) | 2123.2 | 2086.5 | 0.0 |
| 24(1) | 13(1) | 2083.4 | 2038.3 | 0.1 |
| 24(1) | 14(1) | 2064.0 | 2036.2 | 0.0 |
| 24(1) | 15(1) | 2009.5 | 1977.9 | 0.0 |
| 24(1) | 16(1) | 1983.8 | 1943.3 | 0.2 |
| 24(1) | 17(1) | 1959.6 | 1932.6 | 0.0 |
| 24(1) | 18(1) | 1931.8 | 1901.6 | 0.0 |
| 24(1) | 19(1) | 1852.6 | 1822.5 | 0.3 |
| 24(1) | 20(1) | 1772.9 | 1749.1 | 0.1 |

|       |       |        |        |     |
|-------|-------|--------|--------|-----|
| 24(1) | 21(1) | 1747.3 | 1728.3 | 0.9 |
| 24(1) | 22(1) | 1666.6 | 1654.6 | 1.2 |
| 24(1) | 23(1) | 1609.9 | 1594.2 | 3.0 |
| 25(1) | 1(1)  | 4575.8 | 4389.0 | 0.0 |
| 25(1) | 2(1)  | 4562.6 | 4361.6 | 0.1 |
| 25(1) | 3(1)  | 3978.4 | 3840.9 | 0.1 |
| 25(1) | 4(1)  | 3943.9 | 3809.0 | 0.1 |
| 25(1) | 5(1)  | 3928.2 | 3797.2 | 0.0 |
| 25(1) | 6(1)  | 2601.2 | 2555.5 | 0.1 |
| 25(1) | 7(1)  | 2425.7 | 2370.2 | 0.5 |
| 25(1) | 8(1)  | 2387.5 | 2337.7 | 0.3 |
| 25(1) | 9(1)  | 2301.8 | 2254.7 | 0.1 |
| 25(1) | 10(1) | 2254.0 | 2207.9 | 0.1 |
| 25(1) | 11(1) | 2124.7 | 2081.9 | 0.2 |
| 25(1) | 12(1) | 2105.7 | 2062.9 | 0.1 |
| 25(1) | 13(1) | 2065.9 | 2016.2 | 0.7 |
| 25(1) | 14(1) | 2046.5 | 2011.7 | 0.1 |
| 25(1) | 15(1) | 1992.0 | 1954.3 | 0.1 |
| 25(1) | 16(1) | 1966.3 | 1924.8 | 1.9 |
| 25(1) | 17(1) | 1942.1 | 1908.7 | 0.1 |
| 25(1) | 18(1) | 1914.3 | 1880.5 | 1.8 |
| 25(1) | 19(1) | 1835.0 | 1799.1 | 0.2 |
| 25(1) | 20(1) | 1755.4 | 1726.8 | 0.1 |
| 25(1) | 21(1) | 1729.7 | 1705.7 | 0.0 |
| 25(1) | 22(1) | 1649.1 | 1631.3 | 0.0 |
| 25(1) | 23(1) | 1592.4 | 1571.3 | 0.2 |
| 25(1) | 24(1) | 1545.3 | 1525.8 | 0.0 |
| 26(1) | 1(1)  | 4564.0 | 4377.3 | 0.0 |
| 26(1) | 2(1)  | 4550.8 | 4349.8 | 0.0 |
| 26(1) | 3(1)  | 3966.6 | 3829.6 | 0.0 |
| 26(1) | 4(1)  | 3932.1 | 3797.2 | 0.1 |
| 26(1) | 5(1)  | 3916.5 | 3785.5 | 0.2 |
| 26(1) | 6(1)  | 2589.5 | 2543.8 | 0.0 |
| 26(1) | 7(1)  | 2413.9 | 2358.2 | 0.3 |
| 26(1) | 8(1)  | 2375.8 | 2325.9 | 0.3 |
| 26(1) | 9(1)  | 2290.1 | 2242.2 | 0.2 |
| 26(1) | 10(1) | 2242.2 | 2196.0 | 0.1 |
| 26(1) | 11(1) | 2112.9 | 2070.3 | 0.2 |
| 26(1) | 12(1) | 2093.9 | 2051.0 | 0.7 |
| 26(1) | 13(1) | 2054.1 | 2004.3 | 0.3 |



|       |       |        |        |      |
|-------|-------|--------|--------|------|
| 26(1) | 14(1) | 2034.8 | 2000.8 | 0.1  |
| 26(1) | 15(1) | 1980.2 | 1942.6 | 0.4  |
| 26(1) | 16(1) | 1954.5 | 1912.8 | 1.4  |
| 26(1) | 17(1) | 1930.3 | 1896.5 | 0.5  |
| 26(1) | 18(1) | 1902.6 | 1867.9 | 0.0  |
| 26(1) | 19(1) | 1823.3 | 1787.9 | 7.0  |
| 26(1) | 20(1) | 1743.7 | 1715.1 | 0.0  |
| 26(1) | 21(1) | 1718.0 | 1693.8 | 0.0  |
| 26(1) | 22(1) | 1637.3 | 1619.6 | 0.0  |
| 26(1) | 23(1) | 1580.6 | 1559.5 | 0.0  |
| 26(1) | 24(1) | 1533.5 | 1514.0 | 0.2  |
| 26(1) | 25(1) | 1516.0 | 1491.4 | 0.3  |
| 27(1) | 1(1)  | 4522.0 | 4340.0 | 0.0  |
| 27(1) | 2(1)  | 4508.7 | 4313.6 | 0.0  |
| 27(1) | 3(1)  | 3924.5 | 3791.1 | 0.0  |
| 27(1) | 4(1)  | 3890.1 | 3759.9 | 0.0  |
| 27(1) | 5(1)  | 3874.4 | 3747.9 | 0.0  |
| 27(1) | 6(1)  | 2547.4 | 2506.9 | 0.0  |
| 27(1) | 7(1)  | 2371.9 | 2320.6 | 0.0  |
| 27(1) | 8(1)  | 2333.7 | 2288.5 | 0.0  |
| 27(1) | 9(1)  | 2248.0 | 2205.3 | 0.0  |
| 27(1) | 10(1) | 2200.1 | 2158.4 | 0.0  |
| 27(1) | 11(1) | 2070.9 | 2033.1 | 0.0  |
| 27(1) | 12(1) | 2051.8 | 2014.6 | 0.0  |
| 27(1) | 13(1) | 2012.1 | 1968.8 | 0.0  |
| 27(1) | 14(1) | 1992.7 | 1963.3 | 0.0  |
| 27(1) | 15(1) | 1938.1 | 1905.8 | 0.0  |
| 27(1) | 16(1) | 1912.5 | 1874.5 | 0.3  |
| 27(1) | 17(1) | 1888.3 | 1858.0 | 0.0  |
| 27(1) | 18(1) | 1860.5 | 1830.5 | 0.2  |
| 27(1) | 19(1) | 1781.2 | 1750.8 | 1.2  |
| 27(1) | 20(1) | 1701.6 | 1677.8 | 0.3  |
| 27(1) | 21(1) | 1675.9 | 1658.0 | 0.0  |
| 27(1) | 22(1) | 1595.3 | 1583.5 | 1.0  |
| 27(1) | 23(1) | 1538.5 | 1522.5 | 0.2  |
| 27(1) | 24(1) | 1491.5 | 1478.5 | 34.1 |
| 27(1) | 25(1) | 1473.9 | 1454.1 | 1.0  |
| 27(1) | 26(1) | 1462.2 | 1442.8 | 0.2  |
| 28(1) | 1(1)  | 4462.0 | 4277.8 | 0.0  |
| 28(1) | 2(1)  | 4448.8 | 4251.3 | 0.0  |

|       |       |        |        |      |
|-------|-------|--------|--------|------|
| 28(1) | 3(1)  | 3864.6 | 3729.7 | 0.0  |
| 28(1) | 4(1)  | 3830.1 | 3697.3 | 0.0  |
| 28(1) | 5(1)  | 3814.5 | 3685.1 | 0.0  |
| 28(1) | 6(1)  | 2487.5 | 2446.0 | 0.0  |
| 28(1) | 7(1)  | 2311.9 | 2259.0 | 0.0  |
| 28(1) | 8(1)  | 2273.7 | 2226.7 | 0.0  |
| 28(1) | 9(1)  | 2188.1 | 2142.8 | 0.0  |
| 28(1) | 10(1) | 2140.2 | 2097.0 | 0.0  |
| 28(1) | 11(1) | 2010.9 | 1971.7 | 0.0  |
| 28(1) | 12(1) | 1991.9 | 1951.6 | 0.0  |
| 28(1) | 13(1) | 1952.1 | 1906.7 | 0.0  |
| 28(1) | 14(1) | 1932.7 | 1901.2 | 0.0  |
| 28(1) | 15(1) | 1878.2 | 1843.7 | 0.0  |
| 28(1) | 16(1) | 1852.5 | 1813.7 | 2.4  |
| 28(1) | 17(1) | 1828.3 | 1798.1 | 0.2  |
| 28(1) | 18(1) | 1800.5 | 1769.4 | 0.1  |
| 28(1) | 19(1) | 1721.3 | 1690.0 | 0.1  |
| 28(1) | 20(1) | 1641.6 | 1614.5 | 0.1  |
| 28(1) | 21(1) | 1616.0 | 1593.7 | 4.9  |
| 28(1) | 22(1) | 1535.3 | 1525.1 | 0.2  |
| 28(1) | 23(1) | 1478.6 | 1459.3 | 6.4  |
| 28(1) | 24(1) | 1431.5 | 1415.4 | 0.3  |
| 28(1) | 25(1) | 1414.0 | 1392.5 | 0.2  |
| 28(1) | 26(1) | 1402.2 | 1380.8 | 0.2  |
| 28(1) | 27(1) | 1360.2 | 1343.5 | 28.5 |
| 29(1) | 1(1)  | 4412.5 | 4231.5 | 0.0  |
| 29(1) | 2(1)  | 4399.3 | 4203.8 | 0.1  |
| 29(1) | 3(1)  | 3815.1 | 3683.6 | 0.0  |
| 29(1) | 4(1)  | 3780.6 | 3651.8 | 0.0  |
| 29(1) | 5(1)  | 3764.9 | 3639.8 | 0.0  |
| 29(1) | 6(1)  | 2437.9 | 2397.9 | 0.0  |
| 29(1) | 7(1)  | 2262.4 | 2212.2 | 0.0  |
| 29(1) | 8(1)  | 2224.2 | 2180.2 | 0.0  |
| 29(1) | 9(1)  | 2138.5 | 2096.6 | 0.1  |
| 29(1) | 10(1) | 2090.7 | 2050.6 | 0.0  |
| 29(1) | 11(1) | 1961.4 | 1924.9 | 0.1  |
| 29(1) | 12(1) | 1942.4 | 1904.9 | 0.1  |
| 29(1) | 13(1) | 1902.6 | 1859.0 | 0.1  |
| 29(1) | 14(1) | 1883.2 | 1854.8 | 0.0  |
| 29(1) | 15(1) | 1828.7 | 1797.1 | 3.0  |

|       |       |        |        |      |
|-------|-------|--------|--------|------|
| 29(1) | 16(1) | 1803.0 | 1768.5 | 2.7  |
| 29(1) | 17(1) | 1778.8 | 1751.1 | 0.3  |
| 29(1) | 18(1) | 1751.0 | 1722.3 | 0.3  |
| 29(1) | 19(1) | 1671.7 | 1643.3 | 7.6  |
| 29(1) | 20(1) | 1592.1 | 1569.3 | 1.1  |
| 29(1) | 21(1) | 1566.4 | 1548.1 | 0.1  |
| 29(1) | 22(1) | 1485.8 | 1473.7 | 2.7  |
| 29(1) | 23(1) | 1429.1 | 1414.0 | 0.0  |
| 29(1) | 24(1) | 1382.0 | 1368.7 | 0.3  |
| 29(1) | 25(1) | 1364.5 | 1346.7 | 1.7  |
| 29(1) | 26(1) | 1352.7 | 1335.3 | 13.8 |
| 29(1) | 27(1) | 1310.6 | 1297.2 | 2.2  |
| 29(1) | 28(1) | 1250.7 | 1235.0 | 0.0  |
| 30(1) | 1(1)  | 4395.9 | 4213.1 | 0.0  |
| 30(1) | 2(1)  | 4382.7 | 4185.8 | 0.0  |
| 30(1) | 3(1)  | 3798.5 | 3665.2 | 0.0  |
| 30(1) | 4(1)  | 3764.1 | 3633.5 | 0.0  |
| 30(1) | 5(1)  | 3748.4 | 3621.5 | 0.0  |
| 30(1) | 6(1)  | 2421.4 | 2381.5 | 0.0  |
| 30(1) | 7(1)  | 2245.9 | 2193.9 | 0.0  |
| 30(1) | 8(1)  | 2207.7 | 2162.3 | 0.0  |
| 30(1) | 9(1)  | 2122.0 | 2077.8 | 0.0  |
| 30(1) | 10(1) | 2074.1 | 2032.2 | 0.0  |
| 30(1) | 11(1) | 1944.8 | 1906.3 | 0.0  |
| 30(1) | 12(1) | 1925.8 | 1887.5 | 0.1  |
| 30(1) | 13(1) | 1886.1 | 1840.5 | 0.0  |
| 30(1) | 14(1) | 1866.7 | 1836.1 | 0.0  |
| 30(1) | 15(1) | 1812.1 | 1778.1 | 0.6  |
| 30(1) | 16(1) | 1786.5 | 1748.1 | 1.8  |
| 30(1) | 17(1) | 1762.2 | 1732.5 | 0.1  |
| 30(1) | 18(1) | 1734.5 | 1703.7 | 0.1  |
| 30(1) | 19(1) | 1655.2 | 1625.3 | 0.4  |
| 30(1) | 20(1) | 1575.6 | 1550.6 | 1.3  |
| 30(1) | 21(1) | 1549.9 | 1529.8 | 0.0  |
| 30(1) | 22(1) | 1469.3 | 1455.4 | 1.3  |
| 30(1) | 23(1) | 1412.5 | 1395.6 | 0.1  |
| 30(1) | 24(1) | 1365.4 | 1350.9 | 3.6  |
| 30(1) | 25(1) | 1347.9 | 1327.2 | 3.3  |
| 30(1) | 26(1) | 1336.2 | 1315.0 | 8.1  |
| 30(1) | 27(1) | 1294.1 | 1279.8 | 0.0  |

|       |       |        |        |      |
|-------|-------|--------|--------|------|
| 30(1) | 28(1) | 1234.1 | 1216.7 | 0.2  |
| 30(1) | 29(1) | 1184.6 | 1170.2 | 3.1  |
| 31(1) | 1(1)  | 4337.4 | 4157.1 | 0.0  |
| 31(1) | 2(1)  | 4324.1 | 4130.6 | 0.0  |
| 31(1) | 3(1)  | 3739.9 | 3609.6 | 0.0  |
| 31(1) | 4(1)  | 3705.5 | 3577.5 | 0.0  |
| 31(1) | 5(1)  | 3689.8 | 3565.5 | 0.0  |
| 31(1) | 6(1)  | 2362.8 | 2325.7 | 0.0  |
| 31(1) | 7(1)  | 2187.3 | 2136.1 | 0.2  |
| 31(1) | 8(1)  | 2149.1 | 2106.4 | 0.0  |
| 31(1) | 9(1)  | 2063.4 | 2022.7 | 0.0  |
| 31(1) | 10(1) | 2015.5 | 1974.6 | 0.1  |
| 31(1) | 11(1) | 1886.3 | 1850.5 | 0.1  |
| 31(1) | 12(1) | 1867.2 | 1831.7 | 0.2  |
| 31(1) | 13(1) | 1827.5 | 1785.0 | 12.4 |
| 31(1) | 14(1) | 1808.1 | 1780.8 | 0.1  |
| 31(1) | 15(1) | 1753.5 | 1722.3 | 0.3  |
| 31(1) | 16(1) | 1727.9 | 1692.7 | 0.3  |
| 31(1) | 17(1) | 1703.7 | 1677.7 | 0.8  |
| 31(1) | 18(1) | 1675.9 | 1650.4 | 21.9 |
| 31(1) | 19(1) | 1596.6 | 1568.9 | 0.6  |
| 31(1) | 20(1) | 1517.0 | 1495.7 | 4.7  |
| 31(1) | 21(1) | 1491.3 | 1473.9 | 0.0  |
| 31(1) | 22(1) | 1410.7 | 1399.5 | 0.0  |
| 31(1) | 23(1) | 1353.9 | 1339.7 | 0.1  |
| 31(1) | 24(1) | 1306.9 | 1294.3 | 0.1  |
| 31(1) | 25(1) | 1289.4 | 1272.1 | 5.5  |
| 31(1) | 26(1) | 1277.6 | 1259.4 | 4.7  |
| 31(1) | 27(1) | 1235.5 | 1223.0 | 0.1  |
| 31(1) | 28(1) | 1175.6 | 1160.2 | 4.8  |
| 31(1) | 29(1) | 1126.1 | 1114.6 | 0.0  |
| 31(1) | 30(1) | 1109.5 | 1096.3 | 0.5  |
| 32(1) | 1(1)  | 4310.3 | 4082.3 | 0.0  |
| 32(1) | 2(1)  | 4297.1 | 4046.3 | 1.4  |
| 32(1) | 3(1)  | 3712.9 | 3534.8 | 0.0  |
| 32(1) | 4(1)  | 3678.4 | 3502.1 | 0.1  |
| 32(1) | 5(1)  | 3662.8 | 3490.4 | 0.1  |
| 32(1) | 6(1)  | 2335.8 | 2249.2 | 0.0  |
| 32(1) | 7(1)  | 2160.2 | 2064.4 | 0.0  |
| 32(1) | 8(1)  | 2122.1 | 2031.9 | 0.0  |

|       |       |        |        |      |
|-------|-------|--------|--------|------|
| 32(1) | 9(1)  | 2036.4 | 1948.4 | 0.0  |
| 32(1) | 10(1) | 1988.5 | 1901.7 | 0.0  |
| 32(1) | 11(1) | 1859.2 | 1776.4 | 0.2  |
| 32(1) | 12(1) | 1840.2 | 1757.4 | 4.6  |
| 32(1) | 13(1) | 1800.5 | 1705.8 | 1.8  |
| 32(1) | 14(1) | 1781.1 | 1706.6 | 0.1  |
| 32(1) | 15(1) | 1726.5 | 1648.3 | 0.1  |
| 32(1) | 16(1) | 1700.8 | 1621.5 | 0.3  |
| 32(1) | 17(1) | 1676.6 | 1602.9 | 0.1  |
| 32(1) | 18(1) | 1648.9 | 1574.9 | 0.7  |
| 32(1) | 19(1) | 1569.6 | 1496.7 | 0.3  |
| 32(1) | 20(1) | 1490.0 | 1419.5 | 0.1  |
| 32(1) | 21(1) | 1464.3 | 1396.9 | 0.3  |
| 32(1) | 22(1) | 1383.6 | 1324.5 | 0.0  |
| 32(1) | 23(1) | 1326.9 | 1268.7 | 66.0 |
| 32(1) | 24(1) | 1279.8 | 1217.3 | 5.0  |
| 32(1) | 25(1) | 1262.3 | 1196.7 | 2.2  |
| 32(1) | 26(1) | 1250.5 | 1185.1 | 0.6  |
| 32(1) | 27(1) | 1208.5 | 1141.4 | 9.1  |
| 32(1) | 28(1) | 1148.5 | 1085.6 | 1.6  |
| 32(1) | 29(1) | 1099.0 | 1039.8 | 0.4  |
| 32(1) | 30(1) | 1082.5 | 1020.2 | 0.1  |
| 32(1) | 31(1) | 1023.9 | 964.8  | 0.0  |
| 33(1) | 1(1)  | 4285.8 | 4104.1 | 0.0  |
| 33(1) | 2(1)  | 4272.5 | 4077.8 | 0.0  |
| 33(1) | 3(1)  | 3688.3 | 3556.4 | 0.0  |
| 33(1) | 4(1)  | 3653.9 | 3524.1 | 0.0  |
| 33(1) | 5(1)  | 3638.2 | 3512.3 | 0.0  |
| 33(1) | 6(1)  | 2311.2 | 2272.3 | 0.0  |
| 33(1) | 7(1)  | 2135.7 | 2085.0 | 0.0  |
| 33(1) | 8(1)  | 2097.5 | 2053.0 | 0.0  |
| 33(1) | 9(1)  | 2011.8 | 1969.5 | 0.0  |
| 33(1) | 10(1) | 1963.9 | 1923.7 | 0.0  |
| 33(1) | 11(1) | 1834.6 | 1796.8 | 0.0  |
| 33(1) | 12(1) | 1815.6 | 1779.3 | 0.0  |
| 33(1) | 13(1) | 1775.9 | 1732.8 | 0.1  |
| 33(1) | 14(1) | 1756.5 | 1726.7 | 0.0  |
| 33(1) | 15(1) | 1701.9 | 1669.7 | 0.0  |
| 33(1) | 16(1) | 1676.3 | 1640.0 | 0.6  |
| 33(1) | 17(1) | 1652.1 | 1622.2 | 1.5  |

|       |       |        |        |     |
|-------|-------|--------|--------|-----|
| 33(1) | 18(1) | 1624.3 | 1595.2 | 0.0 |
| 33(1) | 19(1) | 1545.0 | 1516.6 | 0.3 |
| 33(1) | 20(1) | 1465.4 | 1441.9 | 0.1 |
| 33(1) | 21(1) | 1439.7 | 1420.0 | 0.9 |
| 33(1) | 22(1) | 1359.1 | 1346.2 | 1.0 |
| 33(1) | 23(1) | 1302.3 | 1287.1 | 1.5 |
| 33(1) | 24(1) | 1255.2 | 1240.4 | 0.7 |
| 33(1) | 25(1) | 1237.7 | 1218.6 | 0.0 |
| 33(1) | 26(1) | 1226.0 | 1207.6 | 0.2 |
| 33(1) | 27(1) | 1183.9 | 1172.2 | 3.4 |
| 33(1) | 28(1) | 1123.9 | 1106.7 | 3.6 |
| 33(1) | 29(1) | 1074.4 | 1061.5 | 3.1 |
| 33(1) | 30(1) | 1057.9 | 1042.9 | 1.9 |
| 33(1) | 31(1) | 999.3  | 987.3  | 0.6 |
| 33(1) | 32(1) | 972.3  | 911.7  | 0.1 |
| 34(1) | 1(1)  | 4242.9 | 4062.6 | 0.0 |
| 34(1) | 2(1)  | 4229.7 | 4035.7 | 0.0 |
| 34(1) | 3(1)  | 3645.5 | 3515.0 | 0.0 |
| 34(1) | 4(1)  | 3611.0 | 3482.8 | 0.0 |
| 34(1) | 5(1)  | 3595.4 | 3470.9 | 0.0 |
| 34(1) | 6(1)  | 2268.4 | 2229.8 | 0.0 |
| 34(1) | 7(1)  | 2092.8 | 2044.0 | 0.0 |
| 34(1) | 8(1)  | 2054.7 | 2011.8 | 0.0 |
| 34(1) | 9(1)  | 1969.0 | 1928.2 | 0.0 |
| 34(1) | 10(1) | 1921.1 | 1881.6 | 0.1 |
| 34(1) | 11(1) | 1791.8 | 1756.8 | 0.9 |
| 34(1) | 12(1) | 1772.8 | 1737.2 | 0.1 |
| 34(1) | 13(1) | 1733.0 | 1690.8 | 1.1 |
| 34(1) | 14(1) | 1713.7 | 1686.0 | 0.1 |
| 34(1) | 15(1) | 1659.1 | 1628.4 | 0.1 |
| 34(1) | 16(1) | 1633.4 | 1598.3 | 0.2 |
| 34(1) | 17(1) | 1609.2 | 1582.2 | 2.7 |
| 34(1) | 18(1) | 1581.5 | 1554.0 | 0.0 |
| 34(1) | 19(1) | 1502.2 | 1474.7 | 0.9 |
| 34(1) | 20(1) | 1422.6 | 1400.8 | 0.2 |
| 34(1) | 21(1) | 1396.9 | 1379.5 | 0.8 |
| 34(1) | 22(1) | 1316.2 | 1305.1 | 0.1 |
| 34(1) | 23(1) | 1259.5 | 1245.2 | 2.3 |
| 34(1) | 24(1) | 1212.4 | 1199.5 | 1.0 |
| 34(1) | 25(1) | 1194.9 | 1176.8 | 0.2 |

|       |       |        |        |       |
|-------|-------|--------|--------|-------|
| 34(1) | 26(1) | 1183.1 | 1165.7 | 5.5   |
| 34(1) | 27(1) | 1141.1 | 1127.3 | 2.5   |
| 34(1) | 28(1) | 1081.1 | 1066.2 | 0.1   |
| 34(1) | 29(1) | 1031.6 | 1020.0 | 0.0   |
| 34(1) | 30(1) | 1015.1 | 1001.8 | 0.1   |
| 34(1) | 31(1) | 956.5  | 945.7  | 0.1   |
| 34(1) | 32(1) | 929.4  | 866.8  | 0.9   |
| 34(1) | 33(1) | 904.9  | 891.8  | 0.1   |
| 35(1) | 1(1)  | 4197.1 | 4020.8 | 1.4   |
| 35(1) | 2(1)  | 4183.8 | 3992.5 | 0.0   |
| 35(1) | 3(1)  | 3599.7 | 3471.9 | 0.0   |
| 35(1) | 4(1)  | 3565.2 | 3440.8 | 0.0   |
| 35(1) | 5(1)  | 3549.5 | 3429.9 | 0.0   |
| 35(1) | 6(1)  | 2222.5 | 2188.1 | 0.0   |
| 35(1) | 7(1)  | 2047.0 | 2000.6 | 0.0   |
| 35(1) | 8(1)  | 2008.8 | 1967.9 | 0.0   |
| 35(1) | 9(1)  | 1923.1 | 1885.1 | 0.0   |
| 35(1) | 10(1) | 1875.3 | 1836.4 | 0.0   |
| 35(1) | 11(1) | 1746.0 | 1713.9 | 0.0   |
| 35(1) | 12(1) | 1727.0 | 1690.0 | 0.0   |
| 35(1) | 13(1) | 1687.2 | 1647.5 | 0.0   |
| 35(1) | 14(1) | 1667.8 | 1643.2 | 0.2   |
| 35(1) | 15(1) | 1613.3 | 1592.0 | 0.0   |
| 35(1) | 16(1) | 1587.6 | 1554.4 | 0.0   |
| 35(1) | 17(1) | 1563.4 | 1541.4 | 0.0   |
| 35(1) | 18(1) | 1535.6 | 1509.5 | 0.0   |
| 35(1) | 19(1) | 1456.3 | 1432.3 | 0.0   |
| 35(1) | 20(1) | 1376.7 | 1357.5 | 0.0   |
| 35(1) | 21(1) | 1351.0 | 1337.9 | 2.4   |
| 35(1) | 22(1) | 1270.4 | 1265.1 | 0.5   |
| 35(1) | 23(1) | 1213.7 | 1214.7 | 3.0   |
| 35(1) | 24(1) | 1166.6 | 1156.4 | 2.7   |
| 35(1) | 25(1) | 1149.1 | 1131.5 | 113.4 |
| 35(1) | 26(1) | 1137.3 | 1118.7 | 0.0   |
| 35(1) | 27(1) | 1095.2 | 1085.3 | 0.8   |
| 35(1) | 28(1) | 1035.3 | 1020.7 | 2.2   |
| 35(1) | 29(1) | 985.8  | 976.9  | 0.2   |
| 35(1) | 30(1) | 969.2  | 958.1  | 0.1   |
| 35(1) | 31(1) | 910.6  | 902.2  | 0.1   |
| 35(1) | 32(1) | 883.6  | 826.1  | 0.0   |

|       |       |        |        |      |
|-------|-------|--------|--------|------|
| 35(1) | 33(1) | 859.0  | 848.8  | 0.3  |
| 35(1) | 34(1) | 816.2  | 807.5  | 0.2  |
| 36(1) | 1(1)  | 4174.5 | 3995.9 | 0.0  |
| 36(1) | 2(1)  | 4161.3 | 3969.3 | 0.0  |
| 36(1) | 3(1)  | 3577.1 | 3448.5 | 0.0  |
| 36(1) | 4(1)  | 3542.6 | 3416.4 | 0.0  |
| 36(1) | 5(1)  | 3527.0 | 3404.4 | 0.0  |
| 36(1) | 6(1)  | 2200.0 | 2164.1 | 0.1  |
| 36(1) | 7(1)  | 2024.4 | 1975.7 | 0.2  |
| 36(1) | 8(1)  | 1986.2 | 1945.5 | 0.0  |
| 36(1) | 9(1)  | 1900.6 | 1861.4 | 0.1  |
| 36(1) | 10(1) | 1852.7 | 1815.3 | 0.2  |
| 36(1) | 11(1) | 1723.4 | 1690.8 | 3.9  |
| 36(1) | 12(1) | 1704.4 | 1670.2 | 0.1  |
| 36(1) | 13(1) | 1664.6 | 1625.1 | 69.3 |
| 36(1) | 14(1) | 1645.2 | 1619.6 | 0.4  |
| 36(1) | 15(1) | 1590.7 | 1561.2 | 0.9  |
| 36(1) | 16(1) | 1565.0 | 1532.2 | 0.4  |
| 36(1) | 17(1) | 1540.8 | 1516.1 | 0.1  |
| 36(1) | 18(1) | 1513.0 | 1487.6 | 0.8  |
| 36(1) | 19(1) | 1433.8 | 1408.1 | 0.4  |
| 36(1) | 20(1) | 1354.1 | 1337.4 | 1.9  |
| 36(1) | 21(1) | 1328.5 | 1312.8 | 0.0  |
| 36(1) | 22(1) | 1247.8 | 1238.6 | 0.0  |
| 36(1) | 23(1) | 1191.1 | 1178.6 | 0.1  |
| 36(1) | 24(1) | 1144.0 | 1132.9 | 0.8  |
| 36(1) | 25(1) | 1126.5 | 1110.3 | 1.7  |
| 36(1) | 26(1) | 1114.7 | 1098.9 | 0.2  |
| 36(1) | 27(1) | 1072.7 | 1061.7 | 0.0  |
| 36(1) | 28(1) | 1012.7 | 999.7  | 0.0  |
| 36(1) | 29(1) | 963.2  | 953.4  | 0.0  |
| 36(1) | 30(1) | 946.6  | 934.8  | 0.0  |
| 36(1) | 31(1) | 888.1  | 879.2  | 0.0  |
| 36(1) | 32(1) | 861.0  | 803.9  | 0.1  |
| 36(1) | 33(1) | 836.5  | 826.2  | 0.0  |
| 36(1) | 34(1) | 793.6  | 785.0  | 0.0  |
| 36(1) | 35(1) | 747.8  | 741.6  | 0.0  |
| 37(1) | 1(1)  | 4120.5 | 3942.4 | 0.0  |
| 37(1) | 2(1)  | 4107.2 | 3915.3 | 0.0  |
| 37(1) | 3(1)  | 3523.1 | 3394.6 | 0.0  |



|       |       |        |        |       |
|-------|-------|--------|--------|-------|
| 37(1) | 4(1)  | 3488.6 | 3362.8 | 0.0   |
| 37(1) | 5(1)  | 3472.9 | 3350.8 | 0.0   |
| 37(1) | 6(1)  | 2145.9 | 2110.6 | 0.1   |
| 37(1) | 7(1)  | 1970.4 | 1924.7 | 0.0   |
| 37(1) | 8(1)  | 1932.2 | 1891.6 | 0.1   |
| 37(1) | 9(1)  | 1846.5 | 1808.5 | 9.9   |
| 37(1) | 10(1) | 1798.7 | 1761.4 | 0.1   |
| 37(1) | 11(1) | 1669.4 | 1638.1 | 1.3   |
| 37(1) | 12(1) | 1650.3 | 1616.2 | 12.7  |
| 37(1) | 13(1) | 1610.6 | 1571.0 | 0.4   |
| 37(1) | 14(1) | 1591.2 | 1565.7 | 0.3   |
| 37(1) | 15(1) | 1536.7 | 1508.1 | 0.1   |
| 37(1) | 16(1) | 1511.0 | 1477.9 | 0.9   |
| 37(1) | 17(1) | 1486.8 | 1463.7 | 0.1   |
| 37(1) | 18(1) | 1459.0 | 1433.4 | 0.1   |
| 37(1) | 19(1) | 1379.7 | 1354.7 | 0.1   |
| 37(1) | 20(1) | 1300.1 | 1279.4 | 188.3 |
| 37(1) | 21(1) | 1274.4 | 1258.9 | 1.4   |
| 37(1) | 22(1) | 1193.8 | 1184.8 | 0.1   |
| 37(1) | 23(1) | 1137.1 | 1124.8 | 0.1   |
| 37(1) | 24(1) | 1090.0 | 1079.3 | 0.2   |
| 37(1) | 25(1) | 1072.5 | 1056.8 | 0.2   |
| 37(1) | 26(1) | 1060.7 | 1045.0 | 0.0   |
| 37(1) | 27(1) | 1018.6 | 1008.3 | 0.0   |
| 37(1) | 28(1) | 958.7  | 945.8  | 0.0   |
| 37(1) | 29(1) | 909.2  | 899.5  | 0.0   |
| 37(1) | 30(1) | 892.6  | 880.9  | 0.0   |
| 37(1) | 31(1) | 834.0  | 825.5  | 0.0   |
| 37(1) | 32(1) | 807.0  | 750.6  | 0.1   |
| 37(1) | 33(1) | 782.4  | 772.3  | 0.0   |
| 37(1) | 34(1) | 739.6  | 731.1  | 0.0   |
| 37(1) | 35(1) | 693.8  | 687.6  | 0.0   |
| 37(1) | 36(1) | 671.2  | 664.0  | 0.0   |
| 38(1) | 1(1)  | 4079.2 | 3901.6 | 0.0   |
| 38(1) | 2(1)  | 4065.9 | 3874.7 | 0.1   |
| 38(1) | 3(1)  | 3481.8 | 3353.8 | 0.0   |
| 38(1) | 4(1)  | 3447.3 | 3321.9 | 0.0   |
| 38(1) | 5(1)  | 3431.6 | 3310.0 | 0.0   |
| 38(1) | 6(1)  | 2104.6 | 2070.0 | 0.1   |
| 38(1) | 7(1)  | 1929.1 | 1883.2 | 0.0   |

|       |       |        |        |      |
|-------|-------|--------|--------|------|
| 38(1) | 8(1)  | 1890.9 | 1850.4 | 0.0  |
| 38(1) | 9(1)  | 1805.2 | 1767.4 | 0.1  |
| 38(1) | 10(1) | 1757.4 | 1720.8 | 0.0  |
| 38(1) | 11(1) | 1628.1 | 1595.7 | 11.1 |
| 38(1) | 12(1) | 1609.1 | 1576.2 | 0.0  |
| 38(1) | 13(1) | 1569.3 | 1530.0 | 0.1  |
| 38(1) | 14(1) | 1549.9 | 1525.2 | 0.0  |
| 38(1) | 15(1) | 1495.4 | 1466.8 | 0.1  |
| 38(1) | 16(1) | 1469.7 | 1437.3 | 0.1  |
| 38(1) | 17(1) | 1445.5 | 1421.2 | 0.1  |
| 38(1) | 18(1) | 1417.7 | 1392.4 | 0.1  |
| 38(1) | 19(1) | 1338.4 | 1314.2 | 0.4  |
| 38(1) | 20(1) | 1258.8 | 1239.4 | 0.2  |
| 38(1) | 21(1) | 1233.1 | 1218.8 | 1.0  |
| 38(1) | 22(1) | 1152.5 | 1143.8 | 0.3  |
| 38(1) | 23(1) | 1095.8 | 1083.8 | 0.3  |
| 38(1) | 24(1) | 1048.7 | 1038.2 | 0.6  |
| 38(1) | 25(1) | 1031.2 | 1016.4 | 0.1  |
| 38(1) | 26(1) | 1019.4 | 1005.1 | 0.1  |
| 38(1) | 27(1) | 977.3  | 967.9  | 0.7  |
| 38(1) | 28(1) | 917.4  | 905.3  | 0.2  |
| 38(1) | 29(1) | 867.9  | 858.6  | 0.0  |
| 38(1) | 30(1) | 851.3  | 839.6  | 0.0  |
| 38(1) | 31(1) | 792.8  | 783.7  | 0.3  |
| 38(1) | 32(1) | 765.7  | 710.8  | 0.9  |
| 38(1) | 33(1) | 741.1  | 731.3  | 0.5  |
| 38(1) | 34(1) | 698.3  | 690.8  | 0.0  |
| 38(1) | 35(1) | 652.5  | 648.3  | 0.3  |
| 38(1) | 36(1) | 629.9  | 623.1  | 0.0  |
| 38(1) | 37(1) | 575.9  | 569.0  | 0.0  |
| 39(1) | 1(1)  | 4039.6 | 3863.3 | 0.1  |
| 39(1) | 2(1)  | 4026.3 | 3836.5 | 0.0  |
| 39(1) | 3(1)  | 3442.1 | 3315.3 | 0.0  |
| 39(1) | 4(1)  | 3407.7 | 3283.5 | 0.0  |
| 39(1) | 5(1)  | 3392.0 | 3271.6 | 0.0  |
| 39(1) | 6(1)  | 2065.0 | 2031.4 | 0.0  |
| 39(1) | 7(1)  | 1889.5 | 1844.5 | 0.0  |
| 39(1) | 8(1)  | 1851.3 | 1812.7 | 0.0  |
| 39(1) | 9(1)  | 1765.6 | 1729.0 | 0.0  |
| 39(1) | 10(1) | 1717.7 | 1682.3 | 0.1  |

|       |       |        |        |      |
|-------|-------|--------|--------|------|
| 39(1) | 11(1) | 1588.4 | 1556.9 | 0.0  |
| 39(1) | 12(1) | 1569.4 | 1537.7 | 0.1  |
| 39(1) | 13(1) | 1529.7 | 1491.5 | 0.0  |
| 39(1) | 14(1) | 1510.3 | 1486.6 | 0.0  |
| 39(1) | 15(1) | 1455.7 | 1428.5 | 0.1  |
| 39(1) | 16(1) | 1430.1 | 1398.6 | 0.0  |
| 39(1) | 17(1) | 1405.8 | 1383.0 | 0.0  |
| 39(1) | 18(1) | 1378.1 | 1354.2 | 0.0  |
| 39(1) | 19(1) | 1298.8 | 1275.4 | 9.3  |
| 39(1) | 20(1) | 1219.2 | 1201.1 | 0.0  |
| 39(1) | 21(1) | 1193.5 | 1179.8 | 0.1  |
| 39(1) | 22(1) | 1112.9 | 1106.0 | 0.1  |
| 39(1) | 23(1) | 1056.1 | 1045.5 | 0.1  |
| 39(1) | 24(1) | 1009.0 | 1000.4 | 0.0  |
| 39(1) | 25(1) | 991.5  | 978.0  | 0.0  |
| 39(1) | 26(1) | 979.8  | 966.3  | 0.0  |
| 39(1) | 27(1) | 937.7  | 929.2  | 0.0  |
| 39(1) | 28(1) | 877.7  | 866.3  | 0.0  |
| 39(1) | 29(1) | 828.2  | 820.5  | 0.0  |
| 39(1) | 30(1) | 811.7  | 802.2  | 0.0  |
| 39(1) | 31(1) | 753.1  | 747.5  | 2.4  |
| 39(1) | 32(1) | 726.1  | 670.6  | 0.0  |
| 39(1) | 33(1) | 701.5  | 693.0  | 0.0  |
| 39(1) | 34(1) | 658.7  | 651.6  | 0.2  |
| 39(1) | 35(1) | 612.8  | 608.6  | 0.4  |
| 39(1) | 36(1) | 590.2  | 584.5  | 0.0  |
| 39(1) | 37(1) | 536.2  | 531.0  | 0.0  |
| 39(1) | 38(1) | 494.9  | 490.6  | 0.0  |
| 40(1) | 1(1)  | 3990.3 | 3813.2 | 0.0  |
| 40(1) | 2(1)  | 3977.0 | 3785.7 | 0.0  |
| 40(1) | 3(1)  | 3392.9 | 3265.4 | 0.0  |
| 40(1) | 4(1)  | 3358.4 | 3233.8 | 0.0  |
| 40(1) | 5(1)  | 3342.7 | 3221.7 | 0.0  |
| 40(1) | 6(1)  | 2015.7 | 1981.3 | 0.2  |
| 40(1) | 7(1)  | 1840.2 | 1794.1 | 12.1 |
| 40(1) | 8(1)  | 1802.0 | 1762.7 | 0.2  |
| 40(1) | 9(1)  | 1716.3 | 1678.8 | 0.0  |
| 40(1) | 10(1) | 1668.5 | 1633.4 | 39.0 |
| 40(1) | 11(1) | 1539.2 | 1506.5 | 9.5  |
| 40(1) | 12(1) | 1520.1 | 1487.7 | 0.4  |

|       |       |        |        |     |
|-------|-------|--------|--------|-----|
| 40(1) | 13(1) | 1480.4 | 1440.7 | 1.5 |
| 40(1) | 14(1) | 1461.0 | 1436.3 | 0.0 |
| 40(1) | 15(1) | 1406.5 | 1378.6 | 0.0 |
| 40(1) | 16(1) | 1380.8 | 1348.7 | 0.4 |
| 40(1) | 17(1) | 1356.6 | 1333.2 | 1.6 |
| 40(1) | 18(1) | 1328.8 | 1304.1 | 0.6 |
| 40(1) | 19(1) | 1249.5 | 1225.2 | 0.8 |
| 40(1) | 20(1) | 1169.9 | 1150.9 | 3.1 |
| 40(1) | 21(1) | 1144.2 | 1130.3 | 0.4 |
| 40(1) | 22(1) | 1063.6 | 1055.1 | 0.0 |
| 40(1) | 23(1) | 1006.9 | 995.5  | 0.0 |
| 40(1) | 24(1) | 959.8  | 950.1  | 0.0 |
| 40(1) | 25(1) | 942.3  | 927.4  | 0.0 |
| 40(1) | 26(1) | 930.5  | 915.8  | 0.0 |
| 40(1) | 27(1) | 888.4  | 879.4  | 0.0 |
| 40(1) | 28(1) | 828.5  | 816.4  | 0.0 |
| 40(1) | 29(1) | 779.0  | 770.3  | 1.3 |
| 40(1) | 30(1) | 762.4  | 751.3  | 0.2 |
| 40(1) | 31(1) | 703.8  | 696.2  | 0.0 |
| 40(1) | 32(1) | 676.8  | 621.2  | 0.5 |
| 40(1) | 33(1) | 652.2  | 643.1  | 0.0 |
| 40(1) | 34(1) | 609.4  | 602.2  | 0.0 |
| 40(1) | 35(1) | 563.6  | 559.5  | 0.0 |
| 40(1) | 36(1) | 541.0  | 534.9  | 0.0 |
| 40(1) | 37(1) | 487.0  | 481.0  | 0.7 |
| 40(1) | 38(1) | 445.7  | 439.6  | 0.0 |
| 40(1) | 39(1) | 406.0  | 401.3  | 0.0 |
| 41(1) | 1(1)  | 3907.1 | 3729.5 | 0.0 |
| 41(1) | 2(1)  | 3893.9 | 3702.4 | 0.0 |
| 41(1) | 3(1)  | 3309.7 | 3181.7 | 0.0 |
| 41(1) | 4(1)  | 3275.2 | 3149.5 | 0.0 |
| 41(1) | 5(1)  | 3259.6 | 3137.6 | 0.0 |
| 41(1) | 6(1)  | 1932.6 | 1897.5 | 0.2 |
| 41(1) | 7(1)  | 1757.0 | 1711.1 | 0.1 |
| 41(1) | 8(1)  | 1718.8 | 1678.9 | 0.0 |
| 41(1) | 9(1)  | 1633.2 | 1595.3 | 0.2 |
| 41(1) | 10(1) | 1585.3 | 1548.7 | 0.0 |
| 41(1) | 11(1) | 1456.0 | 1423.1 | 0.1 |
| 41(1) | 12(1) | 1437.0 | 1404.1 | 0.2 |
| 41(1) | 13(1) | 1397.2 | 1357.8 | 0.3 |

|       |       |        |        |      |
|-------|-------|--------|--------|------|
| 41(1) | 14(1) | 1377.8 | 1352.8 | 0.0  |
| 41(1) | 15(1) | 1323.3 | 1294.8 | 0.0  |
| 41(1) | 16(1) | 1297.6 | 1264.5 | 24.4 |
| 41(1) | 17(1) | 1273.4 | 1249.0 | 0.1  |
| 41(1) | 18(1) | 1245.6 | 1220.4 | 0.1  |
| 41(1) | 19(1) | 1166.4 | 1141.6 | 0.1  |
| 41(1) | 20(1) | 1086.7 | 1067.3 | 0.0  |
| 41(1) | 21(1) | 1061.1 | 1045.6 | 0.0  |
| 41(1) | 22(1) | 980.4  | 971.2  | 0.0  |
| 41(1) | 23(1) | 923.7  | 911.6  | 0.2  |
| 41(1) | 24(1) | 876.6  | 866.1  | 0.1  |
| 41(1) | 25(1) | 859.1  | 843.9  | 0.0  |
| 41(1) | 26(1) | 847.3  | 832.4  | 0.0  |
| 41(1) | 27(1) | 805.3  | 794.9  | 0.0  |
| 41(1) | 28(1) | 745.3  | 732.5  | 0.1  |
| 41(1) | 29(1) | 695.8  | 686.3  | 0.0  |
| 41(1) | 30(1) | 679.2  | 668.2  | 0.0  |
| 41(1) | 31(1) | 620.7  | 612.0  | 0.0  |
| 41(1) | 32(1) | 593.6  | 535.9  | 0.1  |
| 41(1) | 33(1) | 569.1  | 558.8  | 0.1  |
| 41(1) | 34(1) | 526.2  | 517.7  | 0.0  |
| 41(1) | 35(1) | 480.4  | 474.9  | 0.2  |
| 41(1) | 36(1) | 457.8  | 451.2  | 0.0  |
| 41(1) | 37(1) | 403.8  | 397.5  | 0.0  |
| 41(1) | 38(1) | 362.5  | 354.7  | 0.0  |
| 41(1) | 39(1) | 322.9  | 317.9  | 0.0  |
| 41(1) | 40(1) | 273.6  | 266.4  | 0.0  |
| 42(1) | 1(1)  | 3874.2 | 3699.9 | 0.0  |
| 42(1) | 2(1)  | 3861.0 | 3671.5 | 0.1  |
| 42(1) | 3(1)  | 3276.8 | 3150.9 | 0.0  |
| 42(1) | 4(1)  | 3242.3 | 3118.9 | 0.0  |
| 42(1) | 5(1)  | 3226.7 | 3107.1 | 0.0  |
| 42(1) | 6(1)  | 1899.7 | 1867.4 | 1.3  |
| 42(1) | 7(1)  | 1724.1 | 1681.3 | 0.0  |
| 42(1) | 8(1)  | 1685.9 | 1648.5 | 0.1  |
| 42(1) | 9(1)  | 1600.2 | 1565.5 | 0.2  |
| 42(1) | 10(1) | 1552.4 | 1518.0 | 0.1  |
| 42(1) | 11(1) | 1423.1 | 1392.4 | 0.1  |
| 42(1) | 12(1) | 1404.1 | 1374.4 | 0.2  |
| 42(1) | 13(1) | 1364.3 | 1327.3 | 1.1  |

|       |       |        |        |     |
|-------|-------|--------|--------|-----|
| 42(1) | 14(1) | 1344.9 | 1322.7 | 0.5 |
| 42(1) | 15(1) | 1290.4 | 1264.4 | 1.5 |
| 42(1) | 16(1) | 1264.7 | 1234.4 | 0.1 |
| 42(1) | 17(1) | 1240.5 | 1218.6 | 0.2 |
| 42(1) | 18(1) | 1212.7 | 1190.2 | 0.1 |
| 42(1) | 19(1) | 1133.4 | 1111.0 | 0.5 |
| 42(1) | 20(1) | 1053.8 | 1036.6 | 0.0 |
| 42(1) | 21(1) | 1028.2 | 1015.1 | 0.0 |
| 42(1) | 22(1) | 947.5  | 940.8  | 0.0 |
| 42(1) | 23(1) | 890.8  | 881.0  | 0.0 |
| 42(1) | 24(1) | 843.7  | 836.0  | 0.0 |
| 42(1) | 25(1) | 826.2  | 813.3  | 0.0 |
| 42(1) | 26(1) | 814.4  | 801.7  | 0.0 |
| 42(1) | 27(1) | 772.4  | 765.0  | 0.7 |
| 42(1) | 28(1) | 712.4  | 700.3  | 0.0 |
| 42(1) | 29(1) | 662.9  | 656.4  | 0.0 |
| 42(1) | 30(1) | 646.3  | 637.0  | 0.1 |
| 42(1) | 31(1) | 587.8  | 581.4  | 0.0 |
| 42(1) | 32(1) | 560.7  | 498.1  | 1.4 |
| 42(1) | 33(1) | 536.1  | 528.3  | 0.1 |
| 42(1) | 34(1) | 493.3  | 488.0  | 0.3 |
| 42(1) | 35(1) | 447.5  | 451.8  | 0.0 |
| 42(1) | 36(1) | 424.9  | 419.6  | 0.8 |
| 42(1) | 37(1) | 370.9  | 365.5  | 0.0 |
| 42(1) | 38(1) | 329.6  | 325.9  | 0.0 |
| 42(1) | 39(1) | 289.9  | 288.4  | 0.0 |
| 42(1) | 40(1) | 240.7  | 237.1  | 0.0 |
| 42(1) | 41(1) | 157.5  | 154.0  | 0.0 |

**Table S21.** Geometry of TS **A1–A2** in Cartesian coordinates in Å as obtained at the B3LYP/cc-pVTZ level of theory.

|   |           |           |           |
|---|-----------|-----------|-----------|
| C | 2.196291  | −0.124674 | 0.008547  |
| C | 1.445429  | 1.047817  | 0.020588  |
| C | 0.069659  | 0.948268  | −0.002596 |
| C | −0.598301 | −0.268371 | −0.038656 |
| C | 0.173310  | −1.426207 | −0.046135 |
| C | 1.558954  | −1.364130 | −0.024666 |
| H | 1.926817  | 2.013701  | 0.048038  |
| H | −0.316228 | −2.389951 | −0.073768 |
| H | 2.142733  | −2.275901 | −0.034042 |
| C | −2.092854 | −0.322375 | −0.112459 |
| O | −2.734488 | −0.295556 | −1.128042 |
| O | −2.655054 | −0.425820 | 1.112026  |
| H | −3.615474 | −0.451704 | 0.978497  |
| F | −0.655822 | 2.082256  | 0.012858  |
| O | 3.550557  | 0.006985  | 0.031077  |
| H | 3.961509  | −0.863299 | 0.017320  |

**Table S22.** Geometry of TS (**A1–A2**)\* in Cartesian coordinates in Å as obtained at the B3LYP/cc-pVTZ level of theory.

|   |           |           |           |
|---|-----------|-----------|-----------|
| C | −2.196291 | −0.124674 | 0.008547  |
| C | −1.445429 | 1.047817  | 0.020588  |
| C | −0.069659 | 0.948268  | −0.002596 |
| C | 0.598301  | −0.268371 | −0.038656 |
| C | −0.173310 | −1.426207 | −0.046135 |
| C | −1.558954 | −1.364130 | −0.024666 |
| H | −1.926817 | 2.013701  | 0.048038  |
| H | 0.316228  | −2.389951 | −0.073768 |
| H | −2.142733 | −2.275901 | −0.034042 |
| C | 2.092854  | −0.322375 | −0.112459 |
| O | 2.734488  | −0.295556 | −1.128042 |
| O | 2.655054  | −0.425820 | 1.112026  |
| H | 3.615474  | −0.451704 | 0.978497  |
| F | 0.655822  | 2.082256  | 0.012858  |
| O | −3.550557 | 0.006985  | 0.031077  |
| H | −3.961509 | −0.863299 | 0.017320  |

**Table S23.** Geometry of TS **A1–B1** in Cartesian coordinates in Å as obtained at the B3LYP/cc-pVTZ level of theory.

|   |           |           |           |
|---|-----------|-----------|-----------|
| C | 2.189857  | −0.140984 | −0.010942 |
| C | 1.449159  | 1.033274  | −0.009805 |
| C | 0.066452  | 0.962295  | −0.004096 |
| C | −0.613892 | −0.258359 | −0.000448 |
| C | 0.165924  | −1.421867 | −0.007698 |
| C | 1.546571  | −1.376905 | −0.014151 |
| H | 1.937981  | 1.996149  | −0.025820 |
| H | −0.356343 | −2.367471 | −0.009645 |
| H | 2.136553  | −2.281806 | −0.032396 |
| C | −2.088966 | −0.436822 | 0.006045  |
| O | −2.630250 | −1.517409 | 0.010702  |
| O | −2.791208 | 0.714818  | 0.007250  |
| H | −3.724713 | 0.456536  | 0.010843  |
| F | −0.598046 | 2.125032  | −0.003005 |
| O | 3.565985  | −0.077104 | −0.077647 |
| H | 3.942084  | −0.054926 | 0.808196  |

**Table S24.** Geometry of TS (**A1–B1**)<sup>\*</sup> in Cartesian coordinates in Å as obtained at the B3LYP/cc-pVTZ level of theory.

|   |           |           |           |
|---|-----------|-----------|-----------|
| C | −2.189857 | −0.140984 | −0.010942 |
| C | −1.449159 | 1.033274  | −0.009805 |
| C | −0.066452 | 0.962295  | −0.004096 |
| C | 0.613892  | −0.258359 | −0.000448 |
| C | −0.165924 | −1.421867 | −0.007698 |
| C | −1.546571 | −1.376905 | −0.014151 |
| H | −1.937981 | 1.996149  | −0.025820 |
| H | 0.356343  | −2.367471 | −0.009645 |
| H | −2.136553 | −2.281806 | −0.032396 |
| C | 2.088966  | −0.436822 | 0.006045  |
| O | 2.630250  | −1.517409 | 0.010702  |
| O | 2.791208  | 0.714818  | 0.007250  |
| H | 3.724713  | 0.456536  | 0.010843  |
| F | 0.598046  | 2.125032  | −0.003005 |
| O | −3.565985 | −0.077104 | −0.077647 |
| H | −3.942084 | −0.054926 | 0.808196  |



**Table S25.** Geometry of TS **A1–D1** in Cartesian coordinates in Å as obtained at the B3LYP/cc-pVTZ level of theory.

|   |           |           |           |
|---|-----------|-----------|-----------|
| C | −2.191591 | −0.103588 | −0.018805 |
| C | −1.424365 | 1.055892  | 0.034943  |
| C | −0.048505 | 0.947442  | 0.044633  |
| C | 0.615120  | −0.283299 | 0.004976  |
| C | −0.191950 | −1.428079 | −0.027296 |
| C | −1.569435 | −1.354733 | −0.046937 |
| H | −1.894264 | 2.026912  | 0.075891  |
| H | 0.306215  | −2.386662 | −0.044735 |
| H | −2.165323 | −2.257999 | −0.084855 |
| C | 2.087151  | −0.468795 | 0.003413  |
| O | 2.611857  | −1.526595 | 0.221271  |
| O | 2.824352  | 0.634358  | −0.369060 |
| H | 3.085530  | 1.162594  | 0.392718  |
| F | 0.643992  | 2.095658  | 0.134709  |
| O | −3.539132 | 0.045231  | −0.034091 |
| H | −3.963251 | −0.818761 | −0.065913 |

**Table S26.** Geometry of TS (**A1–D1**)\* in Cartesian coordinates in Å as obtained at the B3LYP/cc-pVTZ level of theory.

|   |           |           |           |
|---|-----------|-----------|-----------|
| C | 2.191591  | −0.103588 | −0.018805 |
| C | 1.424365  | 1.055892  | 0.034943  |
| C | 0.048505  | 0.947442  | 0.044633  |
| C | −0.615120 | −0.283299 | 0.004976  |
| C | 0.191950  | −1.428079 | −0.027296 |
| C | 1.569435  | −1.354733 | −0.046937 |
| H | 1.894264  | 2.026912  | 0.075891  |
| H | −0.306215 | −2.386662 | −0.044735 |
| H | 2.165323  | −2.257999 | −0.084855 |
| C | −2.087151 | −0.468795 | 0.003413  |
| O | −2.611857 | −1.526595 | 0.221271  |
| O | −2.824352 | 0.634358  | −0.369060 |
| H | −3.085530 | 1.162594  | 0.392718  |
| F | −0.643992 | 2.095658  | 0.134708  |
| O | 3.539132  | 0.045231  | −0.034091 |
| H | 3.963251  | −0.818761 | −0.065913 |

**Table S27.** Geometry of TS **A2–B2** in Cartesian coordinates in Å as obtained at the B3LYP/cc-pVTZ level of theory.

|   |           |           |           |
|---|-----------|-----------|-----------|
| C | 2.180567  | −0.186414 | −0.010218 |
| C | 1.484872  | 1.015324  | −0.012417 |
| C | 0.101101  | 0.996032  | −0.006370 |
| C | −0.626440 | −0.199286 | −0.000071 |
| C | 0.108480  | −1.392296 | −0.004934 |
| C | 1.491357  | −1.396431 | −0.010546 |
| H | 2.009238  | 1.959226  | −0.030816 |
| H | −0.431281 | −2.326389 | −0.005544 |
| H | 2.047127  | −2.322807 | −0.026629 |
| C | −2.109048 | −0.207627 | 0.007838  |
| O | −2.829511 | 0.757376  | 0.023472  |
| O | −2.610661 | −1.473192 | −0.002977 |
| H | −3.573201 | −1.374692 | 0.003769  |
| F | −0.523960 | 2.175995  | −0.008858 |
| O | 3.558136  | −0.174764 | −0.076737 |
| H | 3.934717  | −0.170462 | 0.809177  |

**Table S28.** Geometry of TS (**A2–B2**)<sup>\*</sup> in Cartesian coordinates in Å as obtained at the B3LYP/cc-pVTZ level of theory.

|   |           |           |           |
|---|-----------|-----------|-----------|
| C | −2.180567 | −0.186414 | −0.010218 |
| C | −1.484872 | 1.015324  | −0.012417 |
| C | −0.101101 | 0.996032  | −0.006370 |
| C | 0.626440  | −0.199286 | −0.000071 |
| C | −0.108480 | −1.392296 | −0.004934 |
| C | −1.491357 | −1.396431 | −0.010546 |
| H | −2.009238 | 1.959226  | −0.030816 |
| H | 0.431281  | −2.326389 | −0.005544 |
| H | −2.047127 | −2.322807 | −0.026629 |
| C | 2.109048  | −0.207627 | 0.007838  |
| O | 2.829511  | 0.757376  | 0.023472  |
| O | 2.610661  | −1.473192 | −0.002977 |
| H | 3.573201  | −1.374692 | 0.003769  |
| F | 0.523960  | 2.175995  | −0.008858 |
| O | −3.558136 | −0.174764 | −0.076737 |
| H | −3.934717 | −0.170462 | 0.809177  |

**Table S29.** Geometry of TS **A2–D2** in Cartesian coordinates in Å as obtained at the B3LYP/cc-pVTZ level of theory.

|   |           |           |           |
|---|-----------|-----------|-----------|
| C | 2.179539  | −0.172012 | −0.006687 |
| C | 1.479918  | 1.030419  | 0.045793  |
| C | 0.100688  | 1.005527  | 0.034828  |
| C | −0.634733 | −0.188928 | −0.015634 |
| C | 0.105279  | −1.377217 | −0.061749 |
| C | 1.487014  | −1.383002 | −0.061885 |
| H | 2.005198  | 1.972346  | 0.093845  |
| H | −0.434832 | −2.309862 | −0.116223 |
| H | 2.029420  | −2.318878 | −0.109207 |
| C | −2.115159 | −0.201136 | −0.043456 |
| O | −2.815100 | 0.751763  | −0.226467 |
| O | −2.669869 | −1.473216 | 0.094340  |
| H | −2.765613 | −1.697074 | 1.026540  |
| F | −0.527150 | 2.181719  | 0.095408  |
| O | 3.533310  | −0.100692 | −0.000220 |
| H | 3.908179  | −0.986742 | −0.042099 |

**Table S30.** Geometry of TS (**A2–D2**)<sup>\*</sup> in Cartesian coordinates in Å as obtained at the B3LYP/cc-pVTZ level of theory.

|   |           |           |           |
|---|-----------|-----------|-----------|
| C | −2.179539 | −0.172012 | −0.006687 |
| C | −1.479918 | 1.030419  | 0.045793  |
| C | −0.100688 | 1.005527  | 0.034828  |
| C | 0.634733  | −0.188928 | −0.015634 |
| C | −0.105279 | −1.377217 | −0.061749 |
| C | −1.487014 | −1.383002 | −0.061885 |
| H | −2.005198 | 1.972346  | 0.093845  |
| H | 0.434832  | −2.309862 | −0.116223 |
| H | −2.029420 | −2.318878 | −0.109207 |
| C | 2.115159  | −0.201136 | −0.043456 |
| O | 2.815100  | 0.751763  | −0.226467 |
| O | 2.669869  | −1.473216 | 0.094340  |
| H | 2.765613  | −1.697074 | 1.026540  |
| F | 0.527150  | 2.181719  | 0.095408  |
| O | −3.533310 | −0.100692 | −0.000220 |
| H | −3.908179 | −0.986742 | −0.042099 |

**Table S31.** Geometry of TS **B1–B2** in Cartesian coordinates in Å as obtained at the B3LYP/cc-pVTZ level of theory.

|   |           |           |           |
|---|-----------|-----------|-----------|
| C | 2.195572  | −0.159192 | 0.008400  |
| C | 1.456837  | 1.021100  | 0.018295  |
| C | 0.076630  | 0.939049  | −0.004498 |
| C | −0.601699 | −0.267793 | −0.038409 |
| C | 0.161148  | −1.435468 | −0.044034 |
| C | 1.544561  | −1.391754 | −0.022536 |
| H | 1.930216  | 1.993565  | 0.044024  |
| H | −0.340101 | −2.393252 | −0.070275 |
| H | 2.133009  | −2.297341 | −0.029975 |
| C | −2.096671 | −0.307935 | −0.111759 |
| O | −2.738206 | −0.282176 | −1.127457 |
| O | −2.659649 | −0.397609 | 1.113428  |
| H | −3.620214 | −0.418196 | 0.980017  |
| F | −0.630964 | 2.085145  | 0.009175  |
| O | 3.556234  | −0.167030 | 0.028509  |
| H | 3.890464  | 0.735397  | 0.045034  |

**Table S32.** Geometry of TS (**B1–B2**)\* in Cartesian coordinates in Å as obtained at the B3LYP/cc-pVTZ level of theory.

|   |           |           |           |
|---|-----------|-----------|-----------|
| C | −2.195572 | −0.159192 | 0.008400  |
| C | −1.456837 | 1.021100  | 0.018295  |
| C | −0.076630 | 0.939049  | −0.004498 |
| C | 0.601699  | −0.267793 | −0.038409 |
| C | −0.161148 | −1.435468 | −0.044034 |
| C | −1.544561 | −1.391754 | −0.022536 |
| H | −1.930216 | 1.993565  | 0.044024  |
| H | 0.340101  | −2.393252 | −0.070275 |
| H | −2.133009 | −2.297341 | −0.029975 |
| C | 2.096671  | −0.307935 | −0.111759 |
| O | 2.738206  | −0.282176 | −1.127457 |
| O | 2.659649  | −0.397609 | 1.113428  |
| H | 3.620214  | −0.418196 | 0.980017  |
| F | 0.630964  | 2.085145  | 0.009175  |
| O | −3.556234 | −0.167030 | 0.028509  |
| H | −3.890464 | 0.735397  | 0.045034  |

**Table S33.** Geometry of TS **B1–C1** in Cartesian coordinates in Å as obtained at the B3LYP/cc-pVTZ level of theory.

|   |           |           |           |
|---|-----------|-----------|-----------|
| C | –2.191183 | –0.140837 | –0.018538 |
| C | –1.436434 | 1.027451  | 0.032562  |
| C | –0.056265 | 0.937721  | 0.042017  |
| C | 0.618868  | –0.283196 | 0.004713  |
| C | –0.178780 | –1.438513 | –0.025329 |
| C | –1.554876 | –1.384688 | –0.044248 |
| H | –1.899418 | 2.004419  | 0.072723  |
| H | 0.331444  | –2.390740 | –0.041735 |
| H | –2.154370 | –2.282340 | –0.079777 |
| C | 2.092682  | –0.452129 | 0.002806  |
| O | 2.629109  | –1.506239 | 0.208319  |
| O | 2.818997  | 0.664257  | –0.353846 |
| H | 3.067912  | 1.187437  | 0.415455  |
| F | 0.616864  | 2.098300  | 0.128407  |
| O | –3.546733 | –0.129837 | –0.037419 |
| H | –3.872405 | 0.776225  | –0.022642 |

**Table S34.** Geometry of TS (**B1–C1**)<sup>\*</sup> in Cartesian coordinates in Å as obtained at the B3LYP/cc-pVTZ level of theory.

|   |           |           |           |
|---|-----------|-----------|-----------|
| C | 2.191183  | –0.140837 | –0.018538 |
| C | 1.436434  | 1.027451  | 0.032562  |
| C | 0.056265  | 0.937721  | 0.042017  |
| C | –0.618868 | –0.283196 | 0.004713  |
| C | 0.178780  | –1.438513 | –0.025329 |
| C | 1.554876  | –1.384688 | –0.044248 |
| H | 1.899418  | 2.004419  | 0.072723  |
| H | –0.331444 | –2.390740 | –0.041735 |
| H | 2.154370  | –2.282340 | –0.079777 |
| C | –2.092682 | –0.452129 | 0.002806  |
| O | –2.629109 | –1.506239 | 0.208319  |
| O | –2.818997 | 0.664257  | –0.353846 |
| H | –3.067912 | 1.187437  | 0.415455  |
| F | –0.616864 | 2.098300  | 0.128407  |
| O | 3.546733  | –0.129837 | –0.037419 |
| H | 3.872405  | 0.776225  | –0.022642 |

**Table S35.** Geometry of TS **B2–C2** in Cartesian coordinates in Å as obtained at the B3LYP/cc-pVTZ level of theory.

|   |           |           |           |
|---|-----------|-----------|-----------|
| C | 2.177649  | −0.209692 | −0.006883 |
| C | 1.491057  | 1.000907  | 0.042386  |
| C | 0.108831  | 0.994968  | 0.031511  |
| C | −0.637760 | −0.188819 | −0.016606 |
| C | 0.092049  | −1.387023 | −0.060766 |
| C | 1.471247  | −1.412403 | −0.059925 |
| H | 2.009871  | 1.949184  | 0.089270  |
| H | −0.459734 | −2.312896 | −0.114200 |
| H | 2.017379  | −2.343070 | −0.104227 |
| C | −2.118239 | −0.182845 | −0.040549 |
| O | −2.806675 | 0.781283  | −0.209885 |
| O | −2.687935 | −1.448790 | 0.083789  |
| H | −2.786515 | −1.682726 | 1.013215  |
| F | −0.499331 | 2.182214  | 0.089146  |
| O | 3.531614  | −0.276309 | −0.004841 |
| H | 3.907950  | 0.609547  | 0.026104  |

**Table S36.** Geometry of TS (**B2–C2**)\* in Cartesian coordinates in Å as obtained at the B3LYP/cc-pVTZ level of theory.

|   |           |           |           |
|---|-----------|-----------|-----------|
| C | −2.177649 | −0.209692 | −0.006883 |
| C | −1.491057 | 1.000907  | 0.042386  |
| C | −0.108831 | 0.994968  | 0.031511  |
| C | 0.637760  | −0.188819 | −0.016606 |
| C | −0.092049 | −1.387023 | −0.060766 |
| C | −1.471247 | −1.412403 | −0.059925 |
| H | −2.009871 | 1.949184  | 0.089270  |
| H | 0.459734  | −2.312896 | −0.114200 |
| H | −2.017379 | −2.343070 | −0.104227 |
| C | 2.118239  | −0.182845 | −0.040549 |
| O | 2.806675  | 0.781283  | −0.209885 |
| O | 2.687935  | −1.448790 | 0.083789  |
| H | 2.786515  | −1.682726 | 1.013215  |
| F | 0.499331  | 2.182214  | 0.089146  |
| O | −3.531614 | −0.276309 | −0.004841 |
| H | −3.907950 | 0.609547  | 0.026104  |

**Table S37.** Geometry of TS **C1–C2** in Cartesian coordinates in Å as obtained at the B3LYP/cc-pVTZ level of theory.

|   |           |           |           |
|---|-----------|-----------|-----------|
| C | 2.184661  | −0.159373 | 0.001864  |
| C | 1.447751  | 1.022302  | 0.022149  |
| C | 0.067244  | 0.943696  | −0.000912 |
| C | −0.616111 | −0.262038 | −0.041547 |
| C | 0.147622  | −1.431694 | −0.059389 |
| C | 1.530968  | −1.390858 | −0.037761 |
| H | 1.923287  | 1.993589  | 0.053190  |
| H | −0.354852 | −2.388544 | −0.105104 |
| H | 2.117932  | −2.297236 | −0.058009 |
| C | −2.118223 | −0.305666 | −0.125579 |
| O | −2.738370 | −0.255056 | −1.145975 |
| O | −2.755223 | −0.438228 | 1.066091  |
| H | −2.107723 | −0.445843 | 1.781370  |
| F | −0.636469 | 2.091284  | 0.024329  |
| O | 3.544029  | −0.170719 | 0.020472  |
| H | 3.882624  | 0.730294  | 0.031928  |

**Table S38.** Geometry of TS (**C1–C2**)<sup>\*</sup> (or alternatively **C1–C2**<sup>\*</sup>) in Cartesian coordinates in Å as obtained at the B3LYP/cc-pVTZ level of theory.

|   |           |           |           |
|---|-----------|-----------|-----------|
| C | −2.184661 | −0.159373 | 0.001864  |
| C | −1.447751 | 1.022302  | 0.022149  |
| C | −0.067244 | 0.943696  | −0.000912 |
| C | 0.616111  | −0.262038 | −0.041547 |
| C | −0.147622 | −1.431694 | −0.059389 |
| C | −1.530968 | −1.390858 | −0.037761 |
| H | −1.923287 | 1.993589  | 0.053190  |
| H | 0.354852  | −2.388544 | −0.105104 |
| H | −2.117932 | −2.297236 | −0.058009 |
| C | 2.118223  | −0.305666 | −0.125579 |
| O | 2.738370  | −0.255056 | −1.145975 |
| O | 2.755223  | −0.438228 | 1.066091  |
| H | 2.107723  | −0.445843 | 1.781370  |
| F | 0.636469  | 2.091284  | 0.024329  |
| O | −3.544029 | −0.170719 | 0.020472  |
| H | −3.882624 | 0.730294  | 0.031928  |

**Table S39.** Geometry of TS **C1–D1** in Cartesian coordinates in Å as obtained at the B3LYP/cc-pVTZ level of theory.

|   |           |           |           |
|---|-----------|-----------|-----------|
| C | 2.186148  | −0.134145 | −0.010351 |
| C | 1.437720  | 1.037357  | −0.007834 |
| C | 0.061473  | 0.938886  | −0.002913 |
| C | −0.622993 | −0.273106 | −0.000861 |
| C | 0.165658  | −1.429279 | −0.009465 |
| C | 1.547038  | −1.371974 | −0.015811 |
| H | 1.916730  | 2.005004  | −0.023033 |
| H | −0.352006 | −2.377493 | −0.012248 |
| H | 2.142909  | −2.273085 | −0.035082 |
| C | −2.114359 | −0.454980 | 0.006540  |
| O | −2.619458 | −1.545399 | 0.015848  |
| O | −2.885214 | 0.649813  | 0.003412  |
| H | −2.344391 | 1.450503  | −0.005193 |
| F | −0.634623 | 2.112638  | −0.001559 |
| O | 3.560314  | −0.062517 | −0.078318 |
| H | 3.939118  | −0.030408 | 0.806226  |

**Table S40.** Geometry of TS **(C1–D1)\*** in Cartesian coordinates in Å as obtained at the B3LYP/cc-pVTZ level of theory.

|   |           |           |           |
|---|-----------|-----------|-----------|
| C | −2.186148 | −0.134145 | −0.010351 |
| C | −1.437720 | 1.037357  | −0.007834 |
| C | −0.061473 | 0.938886  | −0.002913 |
| C | 0.622993  | −0.273106 | −0.000861 |
| C | −0.165658 | −1.429279 | −0.009465 |
| C | −1.547038 | −1.371974 | −0.015811 |
| H | −1.916730 | 2.005004  | −0.023033 |
| H | 0.352006  | −2.377493 | −0.012248 |
| H | −2.142909 | −2.273085 | −0.035082 |
| C | 2.114359  | −0.454980 | 0.006540  |
| O | 2.619458  | −1.545399 | 0.015848  |
| O | 2.885214  | 0.649813  | 0.003412  |
| H | 2.344391  | 1.450503  | −0.005193 |
| F | 0.634623  | 2.112638  | −0.001559 |
| O | −3.560314 | −0.062517 | −0.078318 |
| H | −3.939118 | −0.030408 | 0.806226  |



**Table S41.** Geometry of TS **C2–C2\*** in Cartesian coordinates in Å as obtained at the B3LYP/cc-pVTZ level of theory.

|   |           |           |           |
|---|-----------|-----------|-----------|
| C | 2.185548  | −0.191196 | 0.000002  |
| C | 1.475356  | 1.003862  | −0.000002 |
| C | 0.091606  | 0.976847  | −0.000002 |
| C | −0.643407 | −0.216600 | 0.000000  |
| C | 0.116966  | −1.396320 | 0.000005  |
| C | 1.496816  | −1.404239 | 0.000005  |
| H | 1.974354  | 1.963847  | −0.000005 |
| H | −0.370593 | −2.362825 | 0.000008  |
| H | 2.053174  | −2.329642 | 0.000009  |
| C | −2.137842 | −0.195693 | 0.000000  |
| O | −2.800753 | 0.803228  | 0.000008  |
| O | −2.769470 | −1.402599 | −0.000009 |
| H | −2.145549 | −2.134396 | −0.000018 |
| F | −0.520409 | 2.160637  | −0.000007 |
| O | 3.540017  | −0.237715 | 0.000003  |
| H | 3.903687  | 0.653999  | 0.000000  |

**Table S42.** Geometry of TS **(C2–D2)<sub>1</sub>** in Cartesian coordinates in Å as obtained at the B3LYP/cc-pVTZ level of theory.

|   |           |           |           |
|---|-----------|-----------|-----------|
| C | 2.173149  | −0.169988 | 0.011735  |
| C | 1.462884  | 1.017443  | −0.121211 |
| C | 0.080479  | 0.981613  | −0.099250 |
| C | −0.631438 | −0.211648 | 0.030691  |
| C | 0.112948  | −1.389938 | 0.148284  |
| C | 1.498640  | −1.379680 | 0.146040  |
| H | 1.977496  | 1.957857  | −0.252525 |
| H | −0.405417 | −2.330772 | 0.280759  |
| H | 2.064362  | −2.295095 | 0.241883  |
| C | −2.126089 | −0.218376 | 0.104224  |
| O | −2.779876 | 0.602842  | 0.678419  |
| O | −2.733527 | −1.269299 | −0.513919 |
| H | −2.096256 | −1.760120 | −1.045493 |
| F | −0.576310 | 2.137129  | −0.244168 |
| O | 3.550145  | −0.149463 | −0.060680 |
| H | 3.929233  | −0.055223 | 0.819255  |

**Table S43.** Geometry of TS (C2–D2)<sub>2</sub> in Cartesian coordinates in Å as obtained at the B3LYP/cc-pVTZ level of theory.

|   |           |           |           |
|---|-----------|-----------|-----------|
| C | –2.173373 | –0.167147 | –0.032572 |
| C | –1.462925 | 1.020256  | 0.098734  |
| C | –0.080313 | 0.983049  | 0.089816  |
| C | 0.631949  | –0.211422 | –0.029967 |
| C | –0.113213 | –1.388235 | –0.158872 |
| C | –1.498799 | –1.376636 | –0.168748 |
| H | –1.977277 | 1.965001  | 0.195705  |
| H | 0.404581  | –2.328762 | –0.295880 |
| H | –2.064491 | –2.287663 | –0.299766 |
| C | 2.127200  | –0.219520 | –0.089521 |
| O | 2.788962  | 0.611681  | –0.639465 |
| O | 2.726971  | –1.283488 | 0.514663  |
| H | 2.083088  | –1.785775 | 1.026977  |
| F | 0.575123  | 2.139018  | 0.234885  |
| O | –3.550401 | –0.132054 | –0.097308 |
| H | –3.929436 | –0.225150 | 0.782654  |

**Table S44.** Geometry of TS (C2\*–D2\*)<sub>1</sub> (or alternatively (C2–D2)<sub>1</sub>\*) in Cartesian coordinates in Å as obtained at the B3LYP/cc-pVTZ level of theory.

|   |           |           |           |
|---|-----------|-----------|-----------|
| C | –2.173149 | –0.169991 | 0.011750  |
| C | –1.462887 | 1.017462  | –0.121010 |
| C | –0.080482 | 0.981629  | –0.099084 |
| C | 0.631438  | –0.211654 | 0.030644  |
| C | –0.112945 | –1.389963 | 0.148056  |
| C | –1.498637 | –1.379705 | 0.145842  |
| H | –1.977502 | 1.957898  | –0.252158 |
| H | 0.405423  | –2.330819 | 0.280363  |
| H | –2.064358 | –2.295135 | 0.241544  |
| C | 2.126091  | –0.218393 | 0.104144  |
| O | 2.779889  | 0.602731  | 0.678461  |
| O | 2.733516  | –1.269213 | –0.514186 |
| H | 2.096233  | –1.759948 | –1.045825 |
| F | 0.576305  | 2.137170  | –0.243821 |
| O | –3.550142 | –0.149454 | –0.060639 |
| H | –3.929218 | –0.055340 | 0.819315  |

**Table S45.** Geometry of TS (**C2**<sup>\*</sup>–**D2**<sup>\*</sup>)<sub>2</sub> (or alternatively (**C2**–**D2**)<sub>2</sub><sup>\*</sup>) in Cartesian coordinates in Å as obtained at the B3LYP/cc-pVTZ level of theory.

|   |           |           |           |
|---|-----------|-----------|-----------|
| C | 2.173373  | –0.167147 | –0.032571 |
| C | 1.462925  | 1.020256  | 0.098736  |
| C | 0.080313  | 0.983048  | 0.089817  |
| C | –0.631949 | –0.211422 | –0.029967 |
| C | 0.113214  | –1.388235 | –0.158873 |
| C | 1.498799  | –1.376636 | –0.168748 |
| H | 1.977277  | 1.965000  | 0.195708  |
| H | –0.404581 | –2.328762 | –0.295882 |
| H | 2.064492  | –2.287663 | –0.299767 |
| C | –2.127200 | –0.219520 | –0.089522 |
| O | –2.788961 | 0.611676  | –0.639475 |
| O | –2.726971 | –1.283482 | 0.514670  |
| H | –2.083088 | –1.785766 | 1.026987  |
| F | –0.575124 | 2.139017  | 0.234887  |
| O | 3.550399  | –0.132054 | –0.097309 |
| H | 3.929436  | –0.225144 | 0.782652  |

**Table S46.** Geometry of TS **D1**–**D2** in Cartesian coordinates in Å as obtained at the B3LYP/cc-pVTZ level of theory.

|   |           |           |           |
|---|-----------|-----------|-----------|
| C | –2.185266 | –0.126106 | 0.001505  |
| C | –1.437056 | 1.048321  | 0.028583  |
| C | –0.060896 | 0.953737  | 0.004665  |
| C | 0.613061  | –0.261197 | –0.042312 |
| C | –0.158581 | –1.421516 | –0.065973 |
| C | –1.544326 | –1.363756 | –0.044893 |
| H | –1.921640 | 2.012401  | 0.064575  |
| H | 0.332986  | –2.383765 | –0.116341 |
| H | –2.125590 | –2.276782 | –0.070650 |
| C | 2.114653  | –0.318061 | –0.127368 |
| O | 2.735471  | –0.250605 | –1.146339 |
| O | 2.749982  | –0.485083 | 1.060988  |
| H | 2.102808  | –0.495161 | 1.776523  |
| F | 0.659602  | 2.089713  | 0.035992  |
| O | –3.538538 | 0.002507  | 0.023667  |
| H | –3.949840 | –0.867207 | –0.009809 |

**Table S47.** Geometry of TS (**D1–D2**)<sup>\*</sup> (or alternatively **D1–D2**<sup>\*</sup>) in Cartesian coordinates in Å as obtained at the B3LYP/cc-pVTZ level of theory.

|   |           |           |           |
|---|-----------|-----------|-----------|
| C | 2.185266  | −0.126106 | 0.001505  |
| C | 1.437056  | 1.048321  | 0.028583  |
| C | 0.060896  | 0.953737  | 0.004665  |
| C | −0.613061 | −0.261197 | −0.042312 |
| C | 0.158581  | −1.421516 | −0.065973 |
| C | 1.544326  | −1.363756 | −0.044893 |
| H | 1.921640  | 2.012401  | 0.064575  |
| H | −0.332986 | −2.383765 | −0.116341 |
| H | 2.125590  | −2.276782 | −0.070650 |
| C | −2.114653 | −0.318061 | −0.127368 |
| O | −2.735471 | −0.250605 | −1.146339 |
| O | −2.749982 | −0.485083 | 1.060988  |
| H | −2.102808 | −0.495161 | 1.776523  |
| F | −0.659602 | 2.089713  | 0.035992  |
| O | 3.538538  | 0.002507  | 0.023667  |
| H | 3.949840  | −0.867207 | −0.009809 |

**Table S48.** Geometry of TS **D2–D2**<sup>\*</sup> in Cartesian coordinates in Å as obtained at the B3LYP/cc-pVTZ level of theory.

|   |           |           |           |
|---|-----------|-----------|-----------|
| C | −2.187387 | −0.154869 | 0.000000  |
| C | −1.464271 | 1.032113  | 0.000002  |
| C | −0.083921 | 0.986862  | 0.000001  |
| C | 0.640374  | −0.217270 | −0.000002 |
| C | −0.129972 | −1.386765 | −0.000003 |
| C | −1.512460 | −1.375754 | −0.000003 |
| H | −1.970054 | 1.985909  | 0.000004  |
| H | 0.345011  | −2.359396 | −0.000006 |
| H | −2.064376 | −2.306829 | −0.000005 |
| C | 2.135222  | −0.213503 | −0.000001 |
| O | 2.809693  | 0.777298  | −0.000007 |
| O | 2.753846  | −1.427811 | 0.000007  |
| H | 2.122270  | −2.152819 | 0.000009  |
| F | 0.546797  | 2.160046  | 0.000002  |
| O | −3.539559 | −0.060939 | 0.000000  |
| H | −3.931365 | −0.940552 | 0.000005  |

**Table S49.** Torsional angles (in degrees) and harmonic zero-point energy corrected relative energy values (in kJ mol<sup>-1</sup>) of the 2-F-4-OH-benzoic acid TSs.

| TS                                           | Torsional angles <sup>a</sup> |             |             | $\Delta E_{\text{harm}, \rightarrow}^b$ | $\Delta E_{\text{harm}, \leftarrow}^b$ |
|----------------------------------------------|-------------------------------|-------------|-------------|-----------------------------------------|----------------------------------------|
|                                              | $\varphi_1$                   | $\varphi_2$ | $\varphi_3$ |                                         |                                        |
| A1A2                                         | -179.83157                    | 87.13487    | 179.80905   | 22.0                                    | 18.7                                   |
| (A1A2)*                                      | 179.83157                     | -87.13487   | -179.80905  | 22.0                                    | 18.7                                   |
| A1B1                                         | 91.21986                      | -179.90381  | 179.95462   | 18.1                                    | 17.4                                   |
| (A1B1)*                                      | -91.21986                     | 179.90381   | -179.95462  | 18.1                                    | 17.4                                   |
| A1D1                                         | -179.62300                    | 165.52406   | 92.73905    | 44.0                                    | 36.7                                   |
| (A1D1)*                                      | 179.62300                     | -165.52406  | -92.73905   | 44.0                                    | 36.7                                   |
| A2B2                                         | 91.60152                      | -0.81339    | 179.96917   | 17.8                                    | 17.6                                   |
| (A2B2)*                                      | -91.60152                     | 0.81339     | -179.96917  | 17.9                                    | 17.6                                   |
| A2D2                                         | -179.81865                    | 11.81146    | 86.19866    | 44.8                                    | 17.9                                   |
| (A2D2)*                                      | 179.81865                     | -11.81146   | -86.19866   | 44.8                                    | 17.9                                   |
| B1B2                                         | -0.27988                      | 87.45222    | 179.99565   | 21.8                                    | 19.0                                   |
| (B1B2)*                                      | 0.27988                       | -87.45222   | -179.99565  | 21.8                                    | 19.0                                   |
| B1C1                                         | 0.75461                       | 166.35334   | 92.35919    | 44.2                                    | 36.0                                   |
| (B1C1)*                                      | -0.75461                      | -166.35334  | -92.35919   | 44.2                                    | 36.0                                   |
| B2C2                                         | -0.52450                      | 11.08327    | 86.33061    | 44.7                                    | 18.3                                   |
| (B2C2)*                                      | 0.52450                       | -11.08327   | -86.33061   | 44.7                                    | 18.3                                   |
| C1C2                                         | -1.04758                      | 86.03680    | 2.30296     | 28.0                                    | 6.9                                    |
| C1C2*=(C1C2)*                                | 1.04758                       | -86.03680   | -2.30296    | 28.0                                    | 6.9                                    |
| C1D1                                         | 90.70146                      | -179.54965  | 0.10544     | 16.5                                    | 18.1                                   |
| (C1D1)*                                      | -90.70146                     | 179.54965   | -0.10544    | 16.4                                    | 18.1                                   |
| C2C2*                                        | 0.00000                       | -0.00056    | 0.00000     | 5.2                                     | 5.2                                    |
| (C2D2) <sub>1</sub>                          | 92.40716                      | -37.85138   | -10.56429   | 16.4                                    | 16.2                                   |
| (C2D2) <sub>2</sub>                          | -91.82766                     | -36.46006   | -10.26111   | 17.1                                    | 16.9                                   |
| (C2*D2*) <sub>1</sub> =(C2D2) <sub>1</sub> * | -92.40586                     | 37.85135    | 10.56408    | 16.4                                    | 16.2                                   |
| (C2*D2*) <sub>2</sub> =(C2D2) <sub>2</sub> * | 91.82729                      | 36.46067    | 10.26098    | 17.2                                    | 16.9                                   |
| D1D2                                         | 179.27192                     | -85.01465   | -2.79718    | 29.1                                    | 6.2                                    |
| D1D2*=(D1D2)*                                | -179.27192                    | 85.01465    | 2.79718     | 29.1                                    | 6.2                                    |
| D2D2*                                        | -179.99959                    | -0.00054    | 0.00000     | 4.3                                     | 4.3                                    |

<sup>a</sup> The torsional angles are defined in Scheme 1.

<sup>b</sup> with respect to the lower-energy conformer

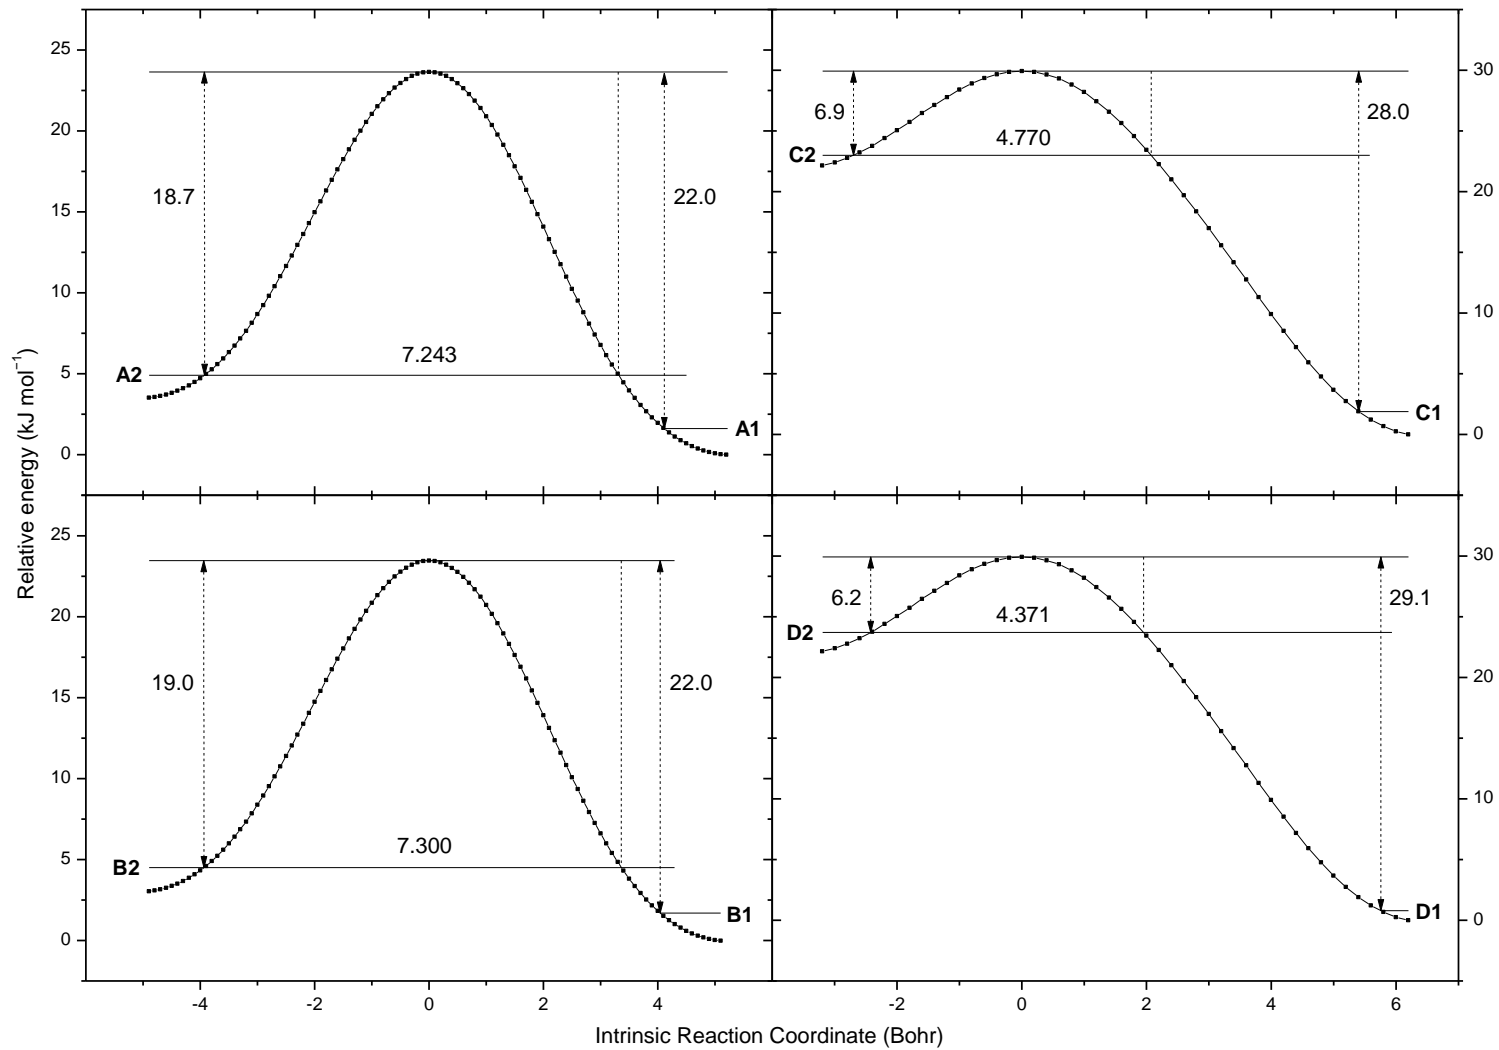

**Figure S1.** IRC profiles of the processes involving the rotation of the COOH group as obtained at the B3LYP/cc-pVTZ level of theory.

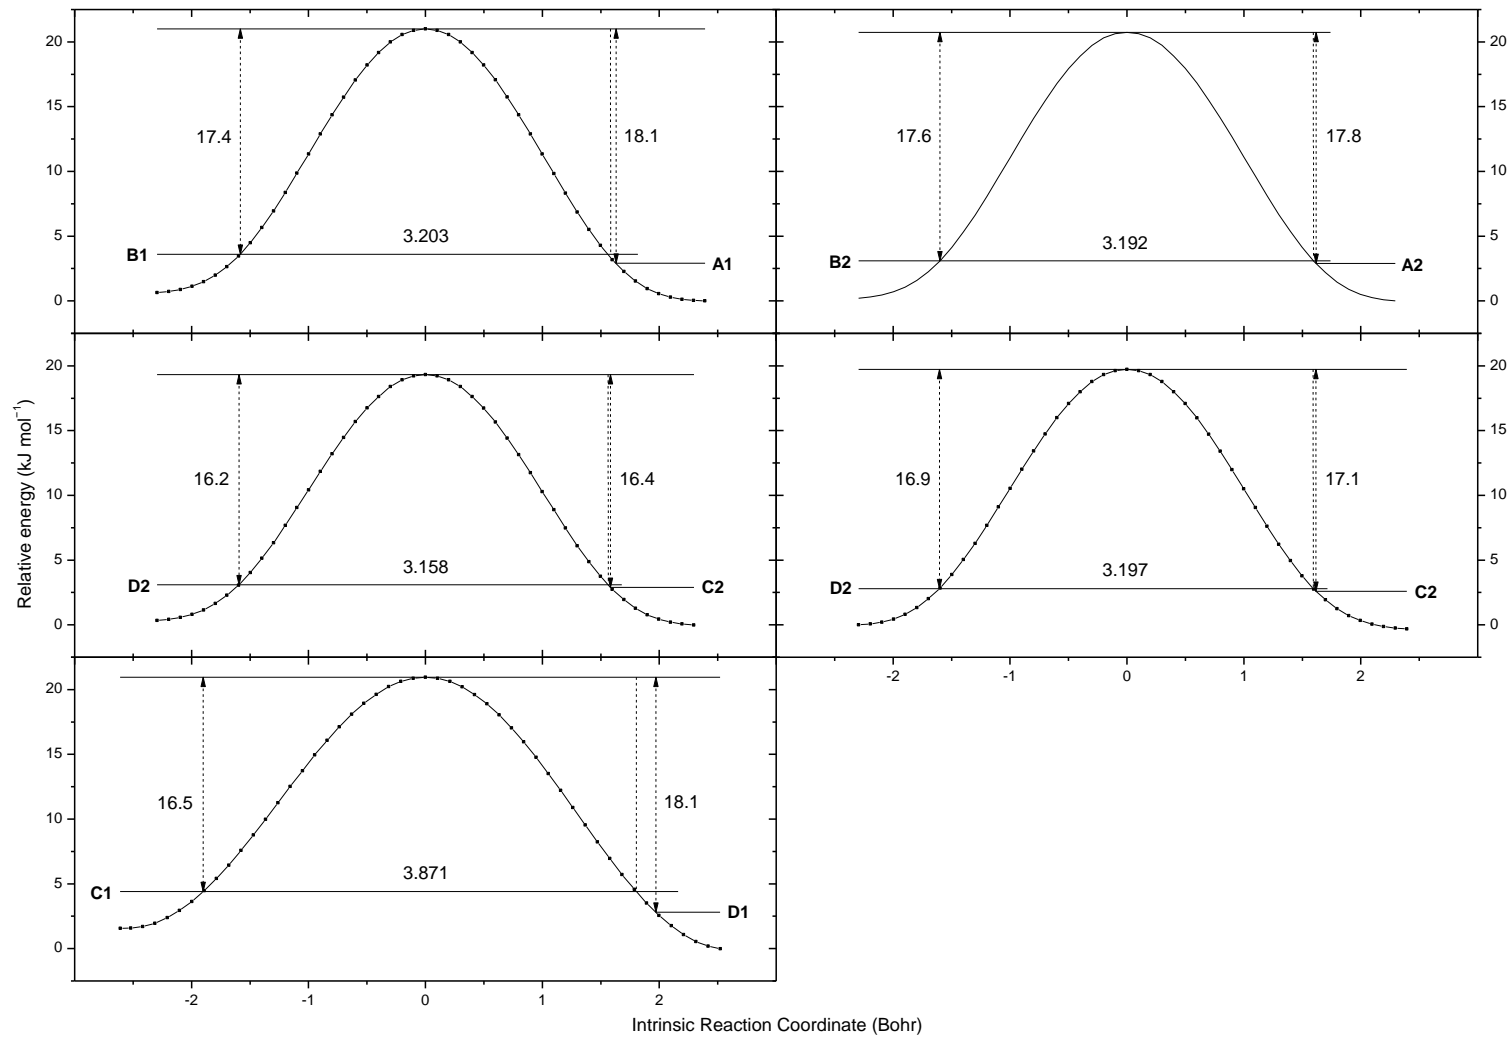

**Figure S2.** IRC profiles of the processes involving the rotation of the 4-OH group as obtained at the B3LYP/cc-pVTZ level of theory.

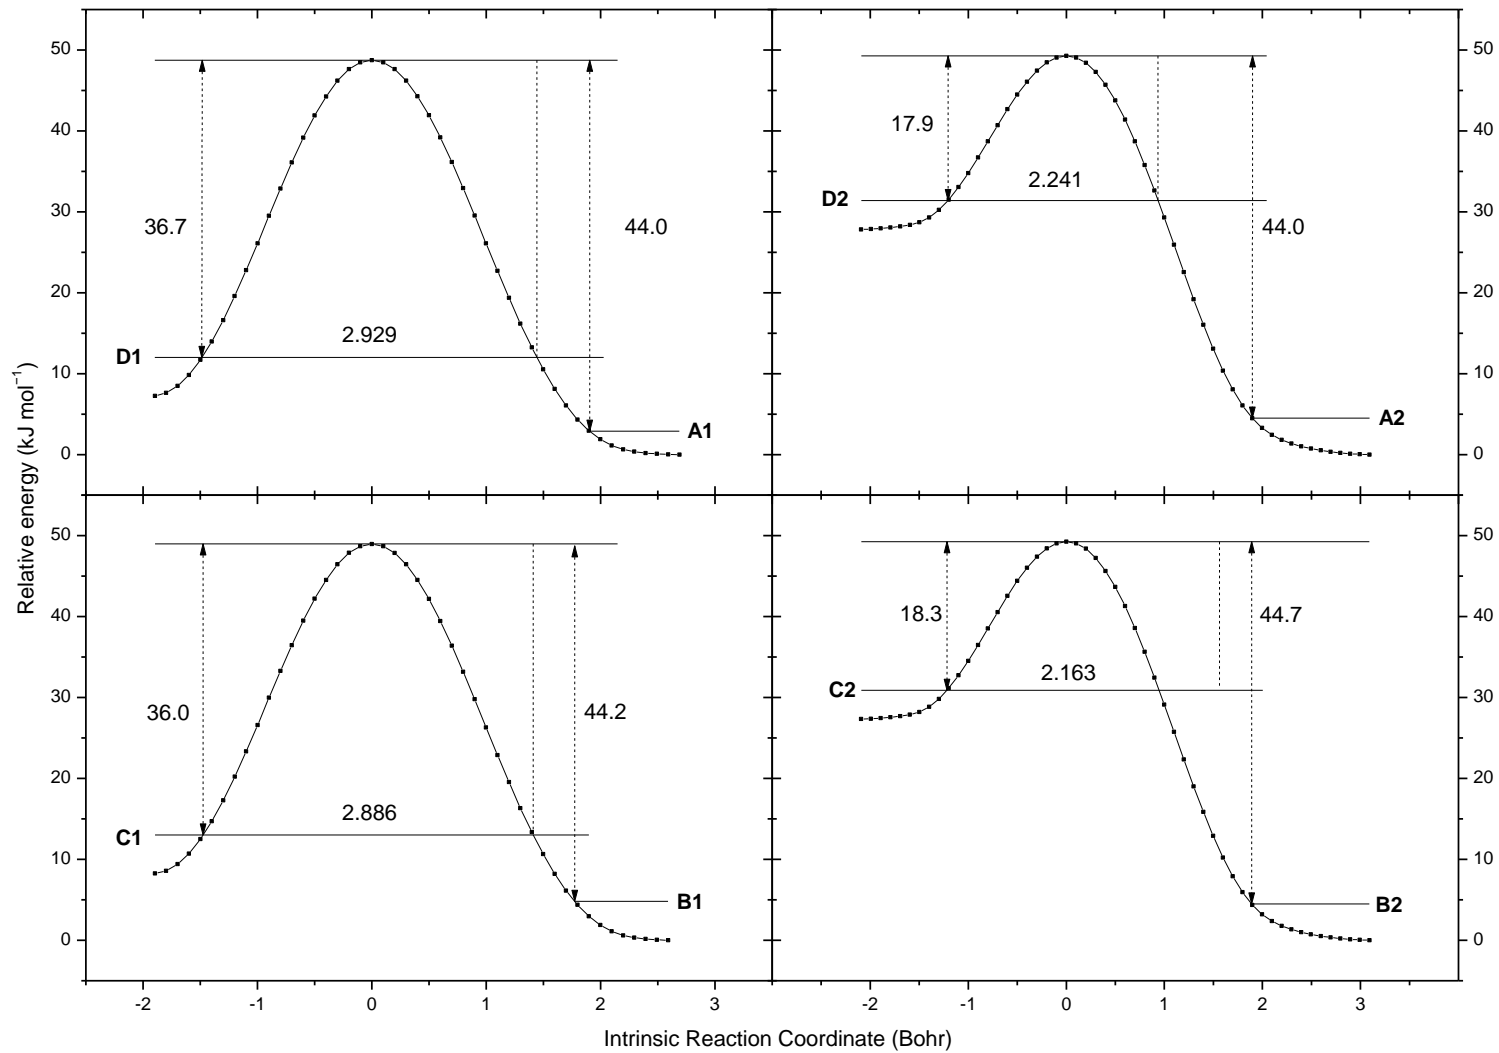

**Figure S3.** IRC profiles of the processes involving the rotation of the OH group in the COOH moiety as obtained at the B3LYP/cc-pVTZ level of theory.



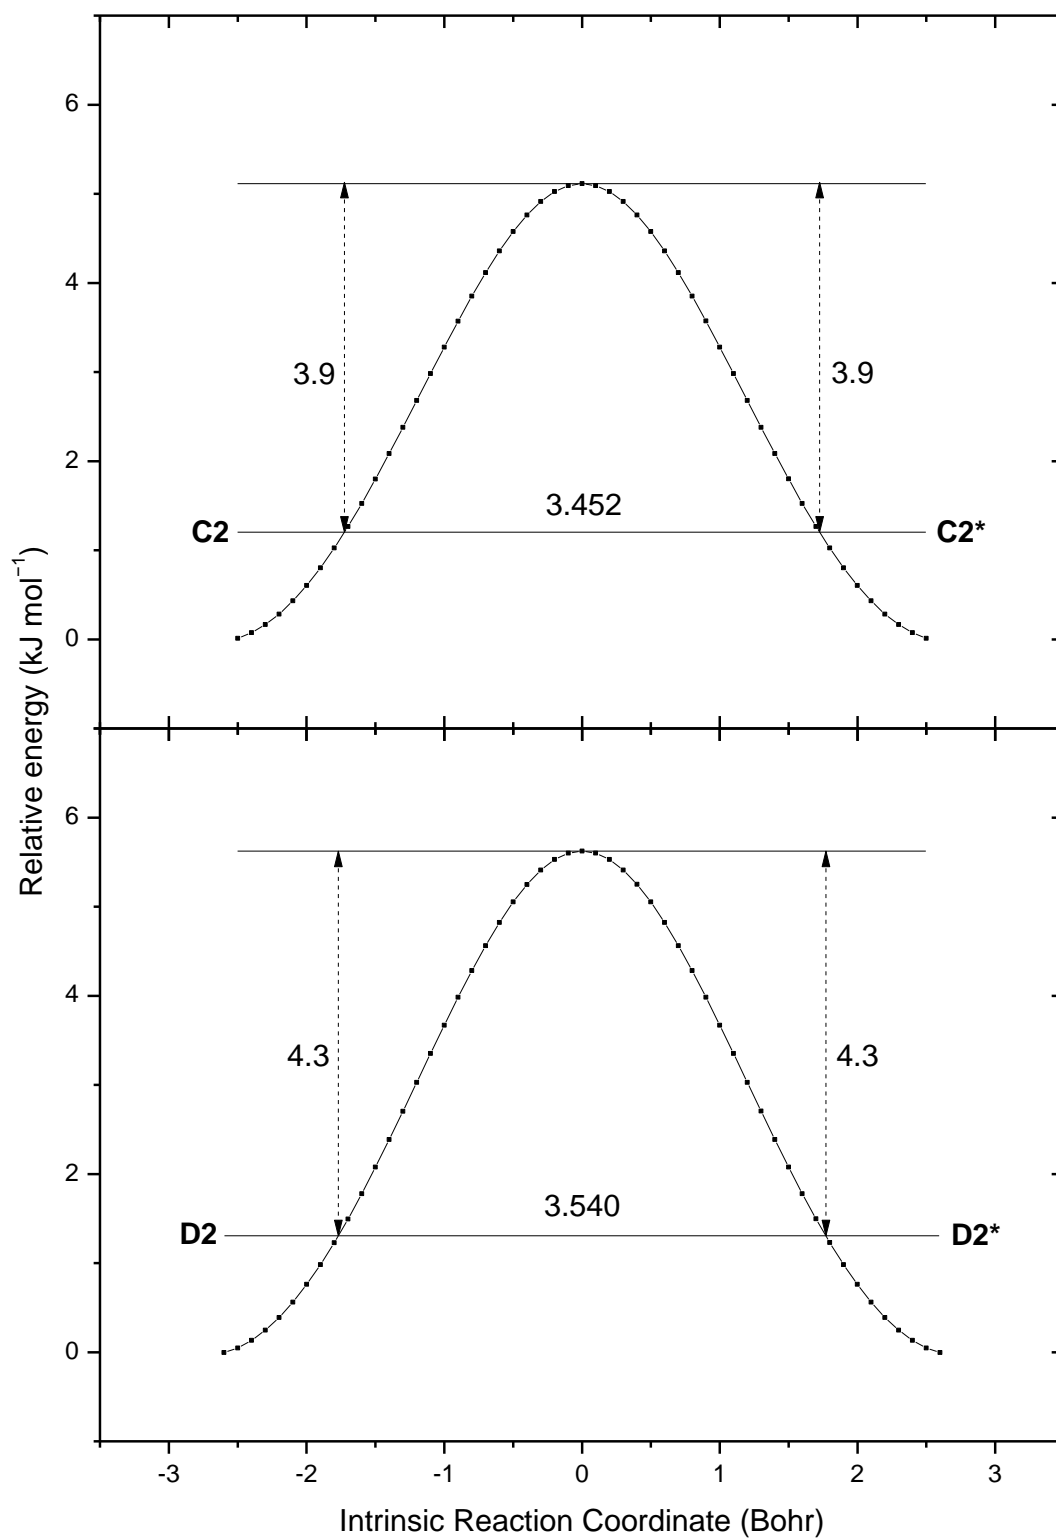

**Figure S4.** IRC profiles of the inversion processes as obtained at the B3LYP/cc-pVTZ level of theory.
